# Supplementary material for: Prenatal exposure to maternal disadvantage-related inflammatory biomarkers: associations with neonatal white matter microstructure
Source: PubMed Central journal article supplement (PMC10837200; doi:10.1038/s41398-024-02782-6), 2024-02-02
Supplement: 41398_2024_2782_MOESM1_ESM.pdf [file 41398_2024_2782_MOESM1_ESM.pdf]

## Supplementary Information

**Table S1.** Within SES group means and standard deviations of maternal cytokine levels and neonatal white matter dMRI parameters.

|                                      |                                | Very Low SES |           | Lower-to-Higher SES |           |
|--------------------------------------|--------------------------------|--------------|-----------|---------------------|-----------|
|                                      |                                | <i>M</i>     | <i>SD</i> | <i>M</i>            | <i>SD</i> |
| Maternal Cytokine Levels             | <i>IL-6</i>                    | 0.13         | 0.86      | -0.19               | 0.83      |
|                                      | <i>IL-8</i>                    | -0.06        | 0.80      | -0.01               | 0.86      |
|                                      | <i>IL-10</i>                   | 0.01         | 0.79      | -0.05               | 0.86      |
|                                      | <i>TNF-<math>\alpha</math></i> | -0.06        | 0.78      | 0.01                | 0.83      |
| Corpus Callosum                      | <i>FA</i>                      | 0.34         | 0.03      | 0.35                | 0.03      |
|                                      | <i>MD</i>                      | 1.01         | 0.03      | 1.00                | 0.03      |
|                                      | <i>AD</i>                      | 1.40         | 0.03      | 1.40                | 0.03      |
|                                      | <i>RD</i>                      | 0.81         | 0.04      | 0.80                | 0.04      |
| Superior Cingulum Bundle             | <i>FA</i>                      | 0.23         | 0.03      | 0.22                | 0.02      |
|                                      | <i>MD</i>                      | 1.10         | 0.04      | 1.11                | 0.04      |
|                                      | <i>AD</i>                      | 1.36         | 0.05      | 1.36                | 0.04      |
|                                      | <i>RD</i>                      | 0.97         | 0.05      | 0.98                | 0.05      |
| Corticospinal Tract                  | <i>FA</i>                      | 0.27         | 0.03      | 0.27                | 0.03      |
|                                      | <i>MD</i>                      | 0.98         | 0.05      | 0.98                | 0.04      |
|                                      | <i>AD</i>                      | 1.26         | 0.04      | 1.27                | 0.03      |
|                                      | <i>RD</i>                      | 0.84         | 0.06      | 0.83                | 0.05      |
| Optic Radiation                      | <i>FA</i>                      | 0.21         | 0.03      | 0.22                | 0.03      |
|                                      | <i>MD</i>                      | 1.07         | 0.05      | 1.08                | 0.05      |
|                                      | <i>AD</i>                      | 1.31         | 0.05      | 1.33                | 0.04      |
|                                      | <i>RD</i>                      | 0.95         | 0.06      | 0.95                | 0.06      |
| Uncinate Fasciculus                  | <i>FA</i>                      | 0.23         | 0.03      | 0.23                | 0.03      |
|                                      | <i>MD</i>                      | 1.05         | 0.04      | 1.05                | 0.04      |
|                                      | <i>AD</i>                      | 1.31         | 0.05      | 1.32                | 0.04      |
|                                      | <i>RD</i>                      | 0.91         | 0.05      | 0.92                | 0.04      |
| Inferior Fronto-Occipital Fasciculus | <i>FA</i>                      | 0.23         | 0.03      | 0.24                | 0.03      |
|                                      | <i>MD</i>                      | 1.09         | 0.06      | 1.09                | 0.05      |
|                                      | <i>AD</i>                      | 1.35         | 0.04      | 1.37                | 0.03      |
|                                      | <i>RD</i>                      | 0.96         | 0.07      | 0.96                | 0.06      |
| Anterior Limb of Internal Capsule    | <i>FA</i>                      | 0.17         | 0.03      | 0.18                | 0.02      |
|                                      | <i>MD</i>                      | 1.12         | 0.06      | 1.13                | 0.06      |
|                                      | <i>AD</i>                      | 1.32         | 0.05      | 1.33                | 0.04      |
|                                      | <i>RD</i>                      | 1.02         | 0.07      | 1.02                | 0.07      |
| Inferior Cingulum Bundle             | <i>FA</i>                      | 0.21         | 0.02      | 0.21                | 0.02      |
|                                      | <i>MD</i>                      | 0.96         | 0.03      | 0.97                | 0.02      |
|                                      | <i>AD</i>                      | 1.18         | 0.03      | 1.19                | 0.03      |
|                                      | <i>RD</i>                      | 0.86         | 0.03      | 0.86                | 0.03      |
| Fornix                               | <i>FA</i>                      | 0.23         | 0.02      | 0.23                | 0.01      |
|                                      | <i>MD</i>                      | 0.95         | 0.03      | 0.95                | 0.03      |
|                                      | <i>AD</i>                      | 1.19         | 0.04      | 1.19                | 0.04      |
|                                      | <i>RD</i>                      | 0.83         | 0.03      | 0.83                | 0.03      |

Cytokine levels are  $\log_{10}$  transformed values; *M*, mean; *SD*, standard deviation; *FA*, fractional anisotropy; *MD*, mean diffusivity; *AD*, axial diffusivity; *RD*, radial diffusivity; *SES*, socioeconomic status.

**Table S2.** Pearson correlation matrix of average maternal cytokine levels during pregnancy.

|                                              | <b>Maternal Avg. IL-6</b> | <b>Maternal Avg. IL-8</b> | <b>Maternal Avg. IL-10</b> | <b>Maternal Avg. TNF-<math>\alpha</math></b> |
|----------------------------------------------|---------------------------|---------------------------|----------------------------|----------------------------------------------|
| <b>Maternal Avg. IL-6</b>                    | 1.00                      |                           |                            |                                              |
| <b>Maternal Avg. IL-8</b>                    | 0.18                      | 1.00                      |                            |                                              |
| <b>Maternal Avg. IL-10</b>                   | 0.37                      | 0.25                      | 1.00                       |                                              |
| <b>Maternal Avg. TNF-<math>\alpha</math></b> | 0.39                      | 0.33                      | 0.36                       | 1.00                                         |

Values represent Pearson correlation coefficients. All  $p$  values < 0.001. IL, interleukin; TNF- $\alpha$ , tumor necrosis factor alpha; Avg., average.

**Table S3.** Multiple linear regression results of the moderating role of family socioeconomic status group in the relationship between average maternal cytokine concentration and neonatal dMRI parameters.

|                                 | FA      |       |          |                  | MD      |       |          |                  | AD      |       |          |                  | RD      |       |          |                  |
|---------------------------------|---------|-------|----------|------------------|---------|-------|----------|------------------|---------|-------|----------|------------------|---------|-------|----------|------------------|
|                                 | $\beta$ | SE    | <i>p</i> | <i>q</i>         | $\beta$ | SE    | <i>p</i> | <i>q</i>         | $\beta$ | SE    | <i>p</i> | <i>q</i>         | $\beta$ | SE    | <i>p</i> | <i>q</i>         |
| <b>IL-6</b>                     |         |       |          |                  |         |       |          |                  |         |       |          |                  |         |       |          |                  |
| <b>Corpus Callosum</b>          |         |       |          |                  |         |       |          |                  |         |       |          |                  |         |       |          |                  |
| IL-6                            | -0.008  | 0.002 | 0.89     | 0.92             | -0.016  | 0.003 | 0.83     | 0.92             | -0.097  | 0.002 | 0.19     | 0.39             | -0.032  | 0.003 | 0.59     | 0.73             |
| SES group                       | 0.073   | 0.003 | 0.16     | 0.33             | -0.027  | 0.004 | 0.65     | 0.79             | 0.116   | 0.004 | 0.05     | 0.18             | -0.042  | 0.005 | 0.39     | 0.59             |
| Sex                             | -0.092  | 0.003 | 0.07     | 0.27             | -0.072  | 0.004 | 0.21     | 0.48             | -0.078  | 0.003 | 0.17     | 0.41             | 0.041   | 0.004 | 0.39     | 0.77             |
| NICU stay                       | -0.107  | 0.007 | 0.09     | 0.73             | -0.054  | 0.009 | 0.46     | 0.47             | 0.009   | 0.008 | 0.90     | 0.73             | 0.030   | 0.010 | 0.62     | 0.73             |
| GA at delivery                  | 0.006   | 0.001 | 0.93     | 0.95             | 0.023   | 0.001 | 0.77     | 0.92             | 0.115   | 0.001 | 0.15     | 0.82             | -0.022  | 0.002 | 0.74     | 0.92             |
| PMA at scan                     | 0.451   | 0.001 | <0.001   | <b>&lt;0.001</b> | -0.153  | 0.001 | 0.02     | <b>0.02</b>      | -0.244  | 0.001 | <0.001   | <b>&lt;0.001</b> | -0.559  | 0.002 | <0.001   | <b>&lt;0.001</b> |
| Maternal BMI                    | 0.053   | 0.000 | 0.30     | 0.64             | 0.080   | 0.000 | 0.18     | 0.63             | 0.034   | 0.000 | 0.56     | 0.83             | -0.044  | 0.000 | 0.37     | 0.64             |
| IL-6:SES group                  | -0.091  | 0.004 | 0.15     | 0.46             | 0.182   | 0.005 | 0.01     | 0.35             | 0.014   | 0.004 | 0.85     | 0.88             | 0.099   | 0.005 | 0.10     | 0.35             |
| <b>Superior Cingulum Bundle</b> |         |       |          |                  |         |       |          |                  |         |       |          |                  |         |       |          |                  |
| IL-6                            | 0.004   | 0.002 | 0.96     | 0.96             | -0.133  | 0.004 | 0.07     | 0.26             | -0.099  | 0.004 | 0.14     | 0.36             | -0.077  | 0.004 | 0.22     | 0.41             |
| SES group                       | -0.122  | 0.003 | 0.03     | 0.14             | -0.003  | 0.006 | 0.96     | 0.96             | 0.054   | 0.005 | 0.33     | 0.55             | 0.153   | 0.005 | <0.001   | <b>0.03</b>      |
| Sex                             | -0.106  | 0.003 | 0.05     | 0.27             | 0.008   | 0.005 | 0.89     | 0.98             | -0.119  | 0.005 | 0.03     | 0.27             | 0.017   | 0.005 | 0.73     | 0.98             |
| NICU stay                       | -0.051  | 0.006 | 0.47     | 0.73             | -0.150  | 0.012 | 0.04     | 0.73             | 0.052   | 0.011 | 0.45     | 0.73             | 0.086   | 0.011 | 0.18     | 0.73             |
| GA at delivery                  | 0.039   | 0.001 | 0.61     | 0.92             | -0.031  | 0.002 | 0.69     | 0.92             | 0.072   | 0.002 | 0.33     | 0.92             | 0.025   | 0.002 | 0.72     | 0.92             |
| PMA at scan                     | 0.356   | 0.001 | <0.001   | <b>&lt;0.001</b> | -0.131  | 0.002 | 0.04     | <b>0.04</b>      | -0.418  | 0.002 | <0.001   | <b>&lt;0.001</b> | -0.523  | 0.002 | <0.001   | <b>&lt;0.001</b> |
| Maternal BMI                    | -0.037  | 0.000 | 0.51     | 0.80             | 0.052   | 0.000 | 0.39     | 0.64             | -0.048  | 0.000 | 0.38     | 0.64             | -0.006  | 0.000 | 0.90     | 0.92             |
| IL-6:SES group                  | 0.060   | 0.003 | 0.38     | 0.73             | 0.150   | 0.006 | 0.04     | 0.35             | 0.129   | 0.006 | 0.05     | 0.35             | 0.042   | 0.006 | 0.50     | 0.73             |
| <b>Corticospinal Tract</b>      |         |       |          |                  |         |       |          |                  |         |       |          |                  |         |       |          |                  |
| IL-6                            | -0.186  | 0.002 | <0.01    | 0.07             | 0.033   | 0.004 | 0.64     | 0.77             | -0.094  | 0.002 | 0.09     | 0.27             | 0.082   | 0.003 | 0.13     | 0.36             |
| SES group                       | 0.027   | 0.003 | 0.59     | 0.75             | -0.033  | 0.006 | 0.58     | 0.75             | 0.202   | 0.004 | <0.001   | <b>&lt;0.001</b> | 0.066   | 0.005 | 0.14     | 0.31             |
| Sex                             | -0.002  | 0.003 | 0.96     | 0.98             | 0.007   | 0.005 | 0.90     | 0.98             | -0.071  | 0.003 | 0.10     | 0.29             | -0.028  | 0.005 | 0.51     | 0.93             |
| NICU stay                       | 0.005   | 0.006 | 0.93     | 0.96             | -0.061  | 0.012 | 0.40     | 0.73             | 0.043   | 0.007 | 0.45     | 0.96             | -0.003  | 0.011 | 0.96     | 0.96             |
| GA at delivery                  | 0.049   | 0.001 | 0.46     | 0.92             | 0.041   | 0.002 | 0.60     | 0.92             | 0.018   | 0.001 | 0.76     | 0.92             | -0.019  | 0.002 | 0.74     | 0.92             |
| PMA at scan                     | 0.515   | 0.001 | <0.001   | <b>&lt;0.001</b> | -0.210  | 0.002 | <0.001   | <b>&lt;0.001</b> | -0.662  | 0.001 | <0.001   | <b>&lt;0.001</b> | -0.671  | 0.002 | <0.001   | <b>&lt;0.001</b> |
| Maternal BMI                    | 0.053   | 0.000 | 0.28     | 0.64             | 0.053   | 0.000 | 0.38     | 0.64             | -0.015  | 0.000 | 0.73     | 0.85             | -0.044  | 0.000 | 0.32     | 0.64             |
| IL-6:SES group                  | -0.033  | 0.003 | 0.57     | 0.76             | 0.099   | 0.007 | 0.16     | 0.46             | 0.014   | 0.004 | 0.80     | 0.88             | 0.045   | 0.006 | 0.40     | 0.73             |
| <b>Optic Radiation</b>          |         |       |          |                  |         |       |          |                  |         |       |          |                  |         |       |          |                  |
| IL-6                            | -0.127  | 0.002 | 0.03     | 0.21             | -0.047  | 0.004 | 0.52     | 0.72             | -0.111  | 0.003 | 0.09     | 0.27             | 0.031   | 0.004 | 0.58     | 0.73             |
| SES group                       | 0.074   | 0.003 | 0.14     | 0.31             | 0.014   | 0.007 | 0.82     | 0.90             | 0.237   | 0.005 | <0.001   | <b>&lt;0.001</b> | 0.075   | 0.006 | 0.10     | 0.28             |
| Sex                             | -0.023  | 0.003 | 0.63     | 0.94             | -0.024  | 0.006 | 0.69     | 0.98             | -0.200  | 0.005 | <0.001   | <b>&lt;0.001</b> | -0.078  | 0.005 | 0.08     | 0.27             |
| NICU stay                       | -0.160  | 0.007 | 0.01     | 0.32             | -0.072  | 0.014 | 0.32     | 0.96             | -0.007  | 0.010 | 0.91     | 0.73             | 0.119   | 0.012 | 0.04     | 0.47             |
| GA at delivery                  | -0.034  | 0.001 | 0.61     | 0.92             | 0.026   | 0.002 | 0.74     | 0.92             | -0.074  | 0.002 | 0.30     | 0.90             | -0.031  | 0.002 | 0.61     | 0.92             |
| PMA at scan                     | 0.532   | 0.001 | <0.001   | <b>&lt;0.001</b> | -0.176  | 0.002 | 0.01     | <b>0.01</b>      | -0.349  | 0.002 | <0.001   | <b>&lt;0.001</b> | -0.624  | 0.002 | <0.001   | <b>&lt;0.001</b> |
| Maternal BMI                    | 0.012   | 0.000 | 0.80     | 0.85             | 0.132   | 0.000 | 0.03     | 0.40             | 0.138   | 0.000 | 0.01     | 0.34             | 0.068   | 0.000 | 0.13     | 0.53             |
| IL-6:SES group                  | 0.044   | 0.004 | 0.45     | 0.73             | 0.078   | 0.008 | 0.28     | 0.71             | 0.000   | 0.006 | 1.00     | 1.00             | -0.034  | 0.007 | 0.54     | 0.74             |
| <b>Uncinate Fasciculus</b>      |         |       |          |                  |         |       |          |                  |         |       |          |                  |         |       |          |                  |
| IL-6                            | -0.123  | 0.002 | 0.04     | 0.21             | -0.104  | 0.003 | 0.15     | 0.37             | -0.160  | 0.003 | 0.02     | 0.18             | -0.023  | 0.003 | 0.69     | 0.80             |

|                |        |       |        |                  |        |       |      |      |        |       |        |                  |        |       |        |                  |
|----------------|--------|-------|--------|------------------|--------|-------|------|------|--------|-------|--------|------------------|--------|-------|--------|------------------|
| SES group      | -0.041 | 0.003 | 0.41   | 0.59             | 0.019  | 0.005 | 0.76 | 0.86 | 0.088  | 0.005 | 0.12   | 0.30             | 0.093  | 0.005 | 0.05   | 0.18             |
| Sex            | -0.086 | 0.002 | 0.07   | 0.27             | 0.003  | 0.005 | 0.96 | 0.98 | -0.116 | 0.005 | 0.03   | 0.27             | -0.009 | 0.004 | 0.85   | 0.98             |
| NICU stay      | -0.059 | 0.006 | 0.34   | 0.73             | -0.004 | 0.011 | 0.96 | 0.73 | -0.072 | 0.011 | 0.30   | 0.87             | 0.007  | 0.010 | 0.91   | 0.96             |
| GA at delivery | 0.080  | 0.001 | 0.23   | 0.82             | 0.084  | 0.002 | 0.29 | 0.90 | 0.127  | 0.002 | 0.09   | 0.82             | 0.020  | 0.002 | 0.75   | 0.92             |
| PMA at scan    | 0.504  | 0.001 | <0.001 | <b>&lt;0.001</b> | -0.102 | 0.002 | 0.11 | 0.11 | -0.318 | 0.002 | <0.001 | <b>&lt;0.001</b> | -0.641 | 0.002 | <0.001 | <b>&lt;0.001</b> |
| Maternal BMI   | 0.047  | 0.000 | 0.34   | 0.64             | 0.093  | 0.000 | 0.13 | 0.53 | 0.059  | 0.000 | 0.29   | 0.64             | 0.019  | 0.000 | 0.68   | 0.85             |
| IL-6:SES group | -0.015 | 0.003 | 0.80   | 0.88             | 0.075  | 0.006 | 0.30 | 0.72 | -0.093 | 0.006 | 0.17   | 0.46             | -0.051 | 0.005 | 0.37   | 0.73             |

**Inferior Fronto-Occipital Fasciculus**

|                |        |       |        |                  |        |       |      |      |        |       |        |                  |        |       |        |                  |
|----------------|--------|-------|--------|------------------|--------|-------|------|------|--------|-------|--------|------------------|--------|-------|--------|------------------|
| IL-6           | -0.038 | 0.002 | 0.48   | 0.70             | -0.078 | 0.004 | 0.28 | 0.48 | -0.148 | 0.002 | 0.02   | 0.18             | -0.032 | 0.004 | 0.55   | 0.73             |
| SES group      | 0.014  | 0.003 | 0.76   | 0.86             | -0.003 | 0.007 | 0.96 | 0.96 | 0.194  | 0.004 | <0.001 | <b>&lt;0.001</b> | 0.064  | 0.006 | 0.15   | 0.31             |
| Sex            | 0.001  | 0.003 | 0.98   | 0.98             | -0.020 | 0.006 | 0.74 | 0.98 | -0.165 | 0.003 | <0.001 | <b>0.02</b>      | -0.070 | 0.006 | 0.10   | 0.29             |
| NICU stay      | -0.078 | 0.007 | 0.16   | 0.73             | -0.056 | 0.014 | 0.44 | 0.73 | 0.036  | 0.008 | 0.58   | 0.73             | 0.069  | 0.013 | 0.21   | 0.73             |
| GA at delivery | 0.077  | 0.001 | 0.20   | 0.82             | -0.011 | 0.002 | 0.89 | 0.95 | 0.090  | 0.001 | 0.20   | 0.82             | -0.040 | 0.002 | 0.49   | 0.92             |
| PMA at scan    | 0.614  | 0.001 | <0.001 | <b>&lt;0.001</b> | -0.125 | 0.002 | 0.05 | 0.05 | -0.485 | 0.001 | <0.001 | <b>&lt;0.001</b> | -0.675 | 0.002 | <0.001 | <b>&lt;0.001</b> |
| Maternal BMI   | 0.022  | 0.000 | 0.62   | 0.83             | 0.119  | 0.000 | 0.05 | 0.45 | 0.078  | 0.000 | 0.13   | 0.53             | 0.016  | 0.000 | 0.71   | 0.85             |
| IL-6:SES group | -0.026 | 0.004 | 0.64   | 0.82             | 0.119  | 0.008 | 0.10 | 0.35 | 0.051  | 0.004 | 0.42   | 0.73             | 0.036  | 0.007 | 0.49   | 0.73             |

**Anterior Limb of Internal Capsule**

|                |        |       |        |                  |        |       |      |      |        |       |        |                  |        |       |        |                  |
|----------------|--------|-------|--------|------------------|--------|-------|------|------|--------|-------|--------|------------------|--------|-------|--------|------------------|
| IL-6           | -0.008 | 0.002 | 0.88   | 0.92             | -0.070 | 0.005 | 0.33 | 0.52 | -0.124 | 0.003 | 0.06   | 0.26             | -0.062 | 0.004 | 0.28   | 0.48             |
| SES group      | 0.030  | 0.003 | 0.51   | 0.70             | 0.029  | 0.008 | 0.64 | 0.79 | 0.139  | 0.005 | 0.01   | 0.06             | 0.059  | 0.007 | 0.21   | 0.39             |
| Sex            | -0.022 | 0.002 | 0.61   | 0.94             | -0.038 | 0.007 | 0.52 | 0.93 | -0.054 | 0.005 | 0.31   | 0.65             | -0.025 | 0.006 | 0.58   | 0.94             |
| NICU stay      | -0.043 | 0.006 | 0.44   | 0.73             | -0.073 | 0.016 | 0.32 | 0.96 | 0.061  | 0.011 | 0.37   | 0.88             | 0.064  | 0.014 | 0.27   | 0.73             |
| GA at delivery | 0.130  | 0.001 | 0.03   | 0.82             | -0.020 | 0.003 | 0.79 | 0.92 | 0.098  | 0.002 | 0.18   | 0.82             | -0.038 | 0.002 | 0.54   | 0.92             |
| PMA at scan    | 0.593  | 0.001 | <0.001 | <b>&lt;0.001</b> | -0.101 | 0.003 | 0.11 | 0.11 | -0.472 | 0.002 | <0.001 | <b>&lt;0.001</b> | -0.625 | 0.002 | <0.001 | <b>&lt;0.001</b> |
| Maternal BMI   | 0.021  | 0.000 | 0.64   | 0.83             | 0.129  | 0.000 | 0.03 | 0.40 | -0.013 | 0.000 | 0.81   | 0.85             | -0.004 | 0.000 | 0.92   | 0.92             |
| IL-6:SES group | 0.018  | 0.003 | 0.75   | 0.87             | 0.122  | 0.009 | 0.09 | 0.35 | 0.046  | 0.006 | 0.48   | 0.73             | 0.012  | 0.008 | 0.84   | 0.88             |

**Inferior Cingulum Bundle**

|                |        |       |        |                  |        |       |        |                  |        |       |        |                  |        |       |        |                  |
|----------------|--------|-------|--------|------------------|--------|-------|--------|------------------|--------|-------|--------|------------------|--------|-------|--------|------------------|
| IL-6           | -0.139 | 0.002 | 0.04   | 0.21             | 0.010  | 0.002 | 0.89   | 0.92             | -0.121 | 0.002 | 0.08   | 0.26             | 0.042  | 0.002 | 0.46   | 0.69             |
| SES group      | -0.061 | 0.002 | 0.27   | 0.46             | 0.075  | 0.003 | 0.22   | 0.39             | 0.156  | 0.004 | 0.01   | <b>0.04</b>      | 0.158  | 0.003 | <0.001 | <b>0.01</b>      |
| Sex            | -0.013 | 0.002 | 0.80   | 0.98             | 0.011  | 0.003 | 0.85   | 0.98             | -0.103 | 0.003 | 0.06   | 0.27             | -0.082 | 0.003 | 0.07   | 0.27             |
| NICU stay      | -0.100 | 0.005 | 0.14   | 0.96             | -0.015 | 0.007 | 0.84   | 0.73             | -0.033 | 0.008 | 0.64   | 0.96             | 0.075  | 0.006 | 0.20   | 0.73             |
| GA at delivery | -0.103 | 0.001 | 0.16   | 0.82             | 0.121  | 0.001 | 0.12   | 0.82             | -0.004 | 0.001 | 0.95   | 0.95             | 0.117  | 0.001 | 0.07   | 0.82             |
| PMA at scan    | 0.434  | 0.001 | <0.001 | <b>&lt;0.001</b> | -0.239 | 0.001 | <0.001 | <b>&lt;0.001</b> | -0.335 | 0.001 | <0.001 | <b>&lt;0.001</b> | -0.658 | 0.001 | <0.001 | <b>&lt;0.001</b> |
| Maternal BMI   | 0.070  | 0.000 | 0.20   | 0.63             | 0.104  | 0.000 | 0.08   | 0.53             | 0.090  | 0.000 | 0.11   | 0.53             | 0.022  | 0.000 | 0.64   | 0.83             |
| IL-6:SES group | 0.049  | 0.003 | 0.46   | 0.73             | 0.119  | 0.004 | 0.09   | 0.35             | 0.028  | 0.004 | 0.69   | 0.85             | -0.056 | 0.003 | 0.33   | 0.73             |

**Fornix**

|                |        |       |        |                  |        |       |        |                  |        |       |        |                  |        |       |        |                  |
|----------------|--------|-------|--------|------------------|--------|-------|--------|------------------|--------|-------|--------|------------------|--------|-------|--------|------------------|
| IL-6           | -0.094 | 0.001 | 0.17   | 0.38             | -0.090 | 0.003 | 0.21   | 0.41             | -0.163 | 0.003 | 0.01   | 0.18             | -0.059 | 0.002 | 0.30   | 0.49             |
| SES group      | -0.095 | 0.002 | 0.09   | 0.28             | -0.010 | 0.004 | 0.88   | 0.93             | 0.045  | 0.004 | 0.40   | 0.59             | 0.099  | 0.003 | 0.04   | 0.15             |
| Sex            | -0.088 | 0.002 | 0.10   | 0.29             | 0.034  | 0.004 | 0.56   | 0.94             | -0.074 | 0.004 | 0.15   | 0.38             | 0.003  | 0.003 | 0.94   | 0.98             |
| NICU stay      | 0.010  | 0.004 | 0.89   | 0.73             | -0.058 | 0.008 | 0.43   | 0.96             | 0.009  | 0.008 | 0.90   | 0.88             | 0.011  | 0.006 | 0.85   | 0.96             |
| GA at delivery | 0.037  | 0.001 | 0.63   | 0.92             | -0.010 | 0.001 | 0.90   | 0.95             | 0.042  | 0.001 | 0.56   | 0.92             | 0.006  | 0.001 | 0.92   | 0.95             |
| PMA at scan    | 0.362  | 0.001 | <0.001 | <b>&lt;0.001</b> | -0.186 | 0.001 | <0.001 | <b>&lt;0.001</b> | -0.507 | 0.001 | <0.001 | <b>&lt;0.001</b> | -0.653 | 0.001 | <0.001 | <b>&lt;0.001</b> |
| Maternal BMI   | -0.030 | 0.000 | 0.59   | 0.83             | 0.018  | 0.000 | 0.77   | 0.85             | 0.053  | 0.000 | 0.31   | 0.64             | 0.058  | 0.000 | 0.21   | 0.63             |
| IL-6:SES group | 0.127  | 0.002 | 0.06   | 0.35             | 0.144  | 0.004 | 0.04   | 0.35             | 0.114  | 0.004 | 0.08   | 0.35             | -0.019 | 0.003 | 0.74   | 0.87             |

|                                 | FA      |       |        |                  | MD      |       |        |                  | AD      |       |        |                  | RD      |       |        |                  |
|---------------------------------|---------|-------|--------|------------------|---------|-------|--------|------------------|---------|-------|--------|------------------|---------|-------|--------|------------------|
|                                 | $\beta$ | SE    | $p$    | $q$              | $\beta$ | SE    | $p$    | $q$              | $\beta$ | SE    | $p$    | $q$              | $\beta$ | SE    | $p$    | $q$              |
| <b>Corpus Callosum</b>          |         |       |        |                  |         |       |        |                  |         |       |        |                  |         |       |        |                  |
| IL-8                            | 0.015   | 0.002 | 0.81   | 0.94             | 0.086   | 0.003 | 0.26   | 0.94             | 0.018   | 0.003 | 0.81   | 0.94             | 0.008   | 0.003 | 0.90   | 0.94             |
| SES group                       | 0.090   | 0.003 | 0.08   | 0.20             | -0.059  | 0.004 | 0.33   | 0.48             | 0.144   | 0.004 | 0.01   | 0.05             | -0.048  | 0.005 | 0.33   | 0.48             |
| Sex                             | -0.094  | 0.003 | 0.06   | 0.24             | -0.056  | 0.004 | 0.34   | 0.73             | -0.088  | 0.003 | 0.13   | 0.32             | 0.039   | 0.004 | 0.42   | 0.82             |
| NICU stay                       | -0.108  | 0.007 | 0.09   | 0.76             | -0.064  | 0.009 | 0.38   | 0.76             | 0.006   | 0.008 | 0.94   | 0.94             | 0.029   | 0.010 | 0.64   | 0.92             |
| GA at delivery                  | 0.003   | 0.001 | 0.96   | 0.96             | 0.008   | 0.001 | 0.92   | 0.96             | 0.127   | 0.001 | 0.11   | 0.69             | -0.015  | 0.002 | 0.82   | 0.96             |
| PMA at scan                     | 0.456   | 0.001 | <0.001 | <b>&lt;0.001</b> | -0.151  | 0.001 | 0.02   | <b>0.02</b>      | -0.239  | 0.001 | <0.001 | <b>&lt;0.001</b> | -0.560  | 0.002 | <0.001 | <b>&lt;0.001</b> |
| Maternal BMI                    | 0.045   | 0.000 | 0.39   | 0.78             | 0.081   | 0.000 | 0.18   | 0.60             | 0.034   | 0.000 | 0.56   | 0.84             | -0.038  | 0.000 | 0.45   | 0.78             |
| IL-8:SES group                  | -0.032  | 0.004 | 0.62   | 0.95             | -0.061  | 0.005 | 0.42   | 0.95             | -0.065  | 0.004 | 0.38   | 0.95             | -0.020  | 0.005 | 0.75   | 0.95             |
| <b>Superior Cingulum Bundle</b> |         |       |        |                  |         |       |        |                  |         |       |        |                  |         |       |        |                  |
| IL-8                            | -0.044  | 0.002 | 0.53   | 0.94             | 0.142   | 0.004 | 0.06   | 0.94             | 0.047   | 0.004 | 0.50   | 0.94             | 0.083   | 0.004 | 0.20   | 0.94             |
| SES group                       | -0.135  | 0.003 | 0.02   | 0.05             | -0.009  | 0.005 | 0.88   | 0.90             | 0.056   | 0.005 | 0.31   | 0.48             | 0.165   | 0.005 | <0.001 | <b>0.01</b>      |
| Sex                             | -0.103  | 0.003 | 0.06   | 0.24             | 0.023   | 0.005 | 0.69   | 0.91             | -0.119  | 0.005 | 0.03   | 0.24             | 0.014   | 0.005 | 0.77   | 0.91             |
| NICU stay                       | -0.049  | 0.006 | 0.48   | 0.76             | -0.160  | 0.012 | 0.03   | 0.43             | 0.050   | 0.011 | 0.47   | 0.76             | 0.083   | 0.011 | 0.20   | 0.76             |
| GA at delivery                  | 0.041   | 0.001 | 0.59   | 0.96             | -0.023  | 0.002 | 0.77   | 0.96             | 0.090   | 0.002 | 0.23   | 0.77             | 0.035   | 0.002 | 0.61   | 0.96             |
| PMA at scan                     | 0.348   | 0.001 | <0.001 | <b>&lt;0.001</b> | -0.124  | 0.002 | 0.05   | 0.05             | -0.418  | 0.002 | <0.001 | <b>&lt;0.001</b> | -0.516  | 0.002 | <0.001 | <b>&lt;0.001</b> |
| Maternal BMI                    | -0.027  | 0.000 | 0.63   | 0.84             | 0.043   | 0.000 | 0.47   | 0.78             | -0.041  | 0.000 | 0.46   | 0.78             | -0.011  | 0.000 | 0.82   | 0.89             |
| IL-8:SES group                  | 0.080   | 0.003 | 0.25   | 0.95             | -0.082  | 0.006 | 0.28   | 0.95             | -0.005  | 0.006 | 0.95   | 0.96             | -0.083  | 0.006 | 0.20   | 0.95             |
| <b>Corticospinal Tract</b>      |         |       |        |                  |         |       |        |                  |         |       |        |                  |         |       |        |                  |
| IL-8                            | -0.014  | 0.002 | 0.83   | 0.94             | 0.095   | 0.004 | 0.21   | 0.94             | 0.032   | 0.003 | 0.58   | 0.94             | 0.035   | 0.004 | 0.53   | 0.94             |
| SES group                       | 0.066   | 0.003 | 0.19   | 0.36             | -0.059  | 0.006 | 0.33   | 0.48             | 0.228   | 0.004 | <0.001 | <b>&lt;0.001</b> | 0.050   | 0.005 | 0.27   | 0.46             |
| Sex                             | -0.003  | 0.003 | 0.95   | 0.95             | 0.018   | 0.005 | 0.76   | 0.91             | -0.080  | 0.003 | 0.07   | 0.24             | -0.031  | 0.005 | 0.48   | 0.86             |
| NICU stay                       | 0.007   | 0.007 | 0.92   | 0.94             | -0.066  | 0.012 | 0.36   | 0.76             | 0.041   | 0.008 | 0.48   | 0.76             | -0.005  | 0.011 | 0.93   | 0.94             |
| GA at delivery                  | 0.058   | 0.001 | 0.39   | 0.96             | 0.036   | 0.002 | 0.65   | 0.96             | 0.032   | 0.001 | 0.61   | 0.96             | -0.016  | 0.002 | 0.79   | 0.96             |
| PMA at scan                     | 0.521   | 0.001 | <0.001 | <b>&lt;0.001</b> | -0.208  | 0.002 | <0.001 | <b>&lt;0.001</b> | -0.651  | 0.001 | <0.001 | <b>&lt;0.001</b> | -0.671  | 0.002 | <0.001 | <b>&lt;0.001</b> |
| Maternal BMI                    | 0.036   | 0.000 | 0.48   | 0.78             | 0.056   | 0.000 | 0.35   | 0.78             | -0.017  | 0.000 | 0.71   | 0.89             | -0.032  | 0.000 | 0.47   | 0.78             |
| IL-8:SES group                  | -0.048  | 0.004 | 0.44   | 0.95             | -0.021  | 0.007 | 0.78   | 0.95             | -0.063  | 0.004 | 0.28   | 0.95             | 0.008   | 0.006 | 0.88   | 0.96             |
| <b>Optic Radiation</b>          |         |       |        |                  |         |       |        |                  |         |       |        |                  |         |       |        |                  |
| IL-8                            | 0.008   | 0.002 | 0.90   | 0.94             | 0.000   | 0.005 | 1.00   | 1.00             | 0.014   | 0.004 | 0.84   | 0.94             | 0.019   | 0.004 | 0.73   | 0.94             |
| SES group                       | 0.084   | 0.003 | 0.09   | 0.20             | 0.004   | 0.007 | 0.95   | 0.95             | 0.266   | 0.005 | <0.001 | <b>&lt;0.001</b> | 0.084   | 0.006 | 0.06   | 0.17             |
| Sex                             | -0.018  | 0.003 | 0.71   | 0.91             | -0.017  | 0.006 | 0.77   | 0.91             | -0.205  | 0.005 | <0.001 | <b>&lt;0.001</b> | -0.085  | 0.005 | 0.05   | 0.24             |
| NICU stay                       | -0.160  | 0.007 | 0.01   | 0.34             | -0.068  | 0.014 | 0.35   | 0.76             | -0.005  | 0.011 | 0.94   | 0.94             | 0.119   | 0.012 | 0.04   | 0.43             |
| GA at delivery                  | -0.028  | 0.001 | 0.67   | 0.96             | 0.036   | 0.002 | 0.65   | 0.96             | -0.057  | 0.002 | 0.43   | 0.96             | -0.026  | 0.002 | 0.68   | 0.96             |
| PMA at scan                     | 0.535   | 0.001 | <0.001 | <b>&lt;0.001</b> | -0.179  | 0.002 | <0.001 | <b>0.01</b>      | -0.340  | 0.002 | <0.001 | <b>&lt;0.001</b> | -0.621  | 0.002 | <0.001 | <b>&lt;0.001</b> |
| Maternal BMI                    | 0.003   | 0.000 | 0.95   | 0.95             | 0.136   | 0.000 | 0.02   | 0.44             | 0.133   | 0.000 | 0.01   | 0.44             | 0.072   | 0.000 | 0.11   | 0.58             |
| IL-8:SES group                  | -0.031  | 0.004 | 0.62   | 0.95             | 0.077   | 0.008 | 0.30   | 0.95             | -0.018  | 0.006 | 0.79   | 0.95             | 0.003   | 0.007 | 0.96   | 0.96             |
| <b>Uncinate Fasciculus</b>      |         |       |        |                  |         |       |        |                  |         |       |        |                  |         |       |        |                  |
| IL-8                            | 0.032   | 0.002 | 0.61   | 0.94             | 0.087   | 0.004 | 0.26   | 0.94             | 0.014   | 0.004 | 0.85   | 0.94             | -0.018  | 0.003 | 0.76   | 0.94             |
| SES group                       | -0.019  | 0.003 | 0.70   | 0.83             | 0.016   | 0.005 | 0.80   | 0.86             | 0.142   | 0.005 | 0.01   | 0.05             | 0.115   | 0.005 | 0.02   | 0.05             |
| Sex                             | -0.083  | 0.002 | 0.08   | 0.24             | 0.014   | 0.005 | 0.81   | 0.91             | -0.125  | 0.005 | 0.02   | 0.24             | -0.018  | 0.004 | 0.70   | 0.91             |
| NICU stay                       | -0.058  | 0.006 | 0.35   | 0.76             | -0.008  | 0.011 | 0.91   | 0.94             | -0.071  | 0.011 | 0.32   | 0.76             | 0.006   | 0.010 | 0.91   | 0.94             |
| GA at delivery                  | 0.096   | 0.001 | 0.15   | 0.69             | 0.091   | 0.002 | 0.25   | 0.77             | 0.140   | 0.002 | 0.07   | 0.69             | 0.018   | 0.002 | 0.78   | 0.96             |

|                |       |       |        |                  |        |       |      |      |        |       |        |                  |        |       |        |                  |
|----------------|-------|-------|--------|------------------|--------|-------|------|------|--------|-------|--------|------------------|--------|-------|--------|------------------|
| PMA at scan    | 0.505 | 0.001 | <0.001 | <b>&lt;0.001</b> | -0.096 | 0.002 | 0.13 | 0.13 | -0.309 | 0.002 | <0.001 | <b>&lt;0.001</b> | -0.636 | 0.002 | <0.001 | <b>&lt;0.001</b> |
| Maternal BMI   | 0.041 | 0.000 | 0.42   | 0.78             | 0.082  | 0.000 | 0.18 | 0.60 | 0.043  | 0.000 | 0.45   | 0.78             | 0.013  | 0.000 | 0.78   | 0.89             |
| IL-8:SES group | 0.033 | 0.003 | 0.60   | 0.95             | -0.048 | 0.006 | 0.53 | 0.95 | -0.070 | 0.006 | 0.33   | 0.95             | -0.072 | 0.005 | 0.23   | 0.95             |

**Inferior Fronto-Occipital Fasciculus**

|                |        |       |        |                  |        |       |      |      |        |       |        |                  |        |       |        |                  |
|----------------|--------|-------|--------|------------------|--------|-------|------|------|--------|-------|--------|------------------|--------|-------|--------|------------------|
| IL-8           | 0.016  | 0.002 | 0.78   | 0.94             | 0.072  | 0.005 | 0.34 | 0.94 | 0.015  | 0.003 | 0.82   | 0.94             | -0.009 | 0.004 | 0.86   | 0.94             |
| SES group      | 0.018  | 0.003 | 0.69   | 0.83             | -0.014 | 0.007 | 0.82 | 0.86 | 0.219  | 0.004 | <0.001 | <b>&lt;0.001</b> | 0.072  | 0.006 | 0.10   | 0.22             |
| Sex            | 0.006  | 0.003 | 0.88   | 0.93             | -0.007 | 0.006 | 0.90 | 0.93 | -0.168 | 0.003 | <0.001 | <b>0.02</b>      | -0.076 | 0.006 | 0.07   | 0.24             |
| NICU stay      | -0.078 | 0.007 | 0.17   | 0.76             | -0.061 | 0.014 | 0.40 | 0.76 | 0.036  | 0.008 | 0.59   | 0.88             | 0.068  | 0.013 | 0.21   | 0.76             |
| GA at delivery | 0.078  | 0.001 | 0.20   | 0.77             | -0.008 | 0.002 | 0.92 | 0.96 | 0.107  | 0.001 | 0.13   | 0.69             | -0.034 | 0.002 | 0.56   | 0.96             |
| PMA at scan    | 0.617  | 0.001 | <0.001 | <b>&lt;0.001</b> | -0.123 | 0.002 | 0.05 | 0.06 | -0.481 | 0.001 | <0.001 | <b>&lt;0.001</b> | -0.675 | 0.002 | <0.001 | <b>&lt;0.001</b> |
| Maternal BMI   | 0.015  | 0.000 | 0.74   | 0.89             | 0.116  | 0.000 | 0.06 | 0.50 | 0.076  | 0.000 | 0.15   | 0.60             | 0.021  | 0.000 | 0.63   | 0.84             |
| IL-8:SES group | 0.010  | 0.004 | 0.86   | 0.96             | -0.020 | 0.008 | 0.79 | 0.95 | -0.024 | 0.004 | 0.71   | 0.95             | -0.018 | 0.007 | 0.75   | 0.95             |

**Anterior Limb of Internal Capsule**

|                |        |       |        |                  |        |       |      |      |        |       |        |                  |        |       |        |                  |
|----------------|--------|-------|--------|------------------|--------|-------|------|------|--------|-------|--------|------------------|--------|-------|--------|------------------|
| IL-8           | -0.024 | 0.002 | 0.67   | 0.94             | 0.098  | 0.006 | 0.20 | 0.94 | -0.030 | 0.004 | 0.66   | 0.94             | 0.020  | 0.005 | 0.73   | 0.94             |
| SES group      | 0.029  | 0.003 | 0.51   | 0.66             | 0.016  | 0.007 | 0.79 | 0.86 | 0.165  | 0.005 | <0.001 | <b>0.01</b>      | 0.073  | 0.007 | 0.11   | 0.24             |
| Sex            | -0.022 | 0.002 | 0.61   | 0.91             | -0.023 | 0.007 | 0.69 | 0.91 | -0.062 | 0.005 | 0.24   | 0.54             | -0.029 | 0.006 | 0.52   | 0.90             |
| NICU stay      | -0.043 | 0.006 | 0.44   | 0.76             | -0.083 | 0.016 | 0.25 | 0.76 | 0.061  | 0.011 | 0.37   | 0.76             | 0.064  | 0.014 | 0.27   | 0.76             |
| GA at delivery | 0.130  | 0.001 | 0.03   | 0.69             | -0.028 | 0.003 | 0.73 | 0.96 | 0.111  | 0.002 | 0.13   | 0.69             | -0.030 | 0.002 | 0.63   | 0.96             |
| PMA at scan    | 0.591  | 0.001 | <0.001 | <b>&lt;0.001</b> | -0.099 | 0.003 | 0.12 | 0.12 | -0.471 | 0.002 | <0.001 | <b>&lt;0.001</b> | -0.624 | 0.002 | <0.001 | <b>&lt;0.001</b> |
| Maternal BMI   | 0.024  | 0.000 | 0.59   | 0.84             | 0.123  | 0.000 | 0.04 | 0.50 | -0.011 | 0.000 | 0.84   | 0.89             | -0.006 | 0.000 | 0.89   | 0.91             |
| IL-8:SES group | 0.017  | 0.003 | 0.76   | 0.95             | -0.086 | 0.009 | 0.26 | 0.95 | -0.018 | 0.006 | 0.79   | 0.95             | -0.030 | 0.008 | 0.61   | 0.95             |

**Inferior Cingulum Bundle**

|                |        |       |        |                  |        |       |        |                  |        |       |        |                  |        |       |        |                  |
|----------------|--------|-------|--------|------------------|--------|-------|--------|------------------|--------|-------|--------|------------------|--------|-------|--------|------------------|
| IL-8           | -0.077 | 0.002 | 0.27   | 0.94             | 0.023  | 0.002 | 0.76   | 0.94             | -0.098 | 0.003 | 0.17   | 0.94             | -0.007 | 0.002 | 0.91   | 0.94             |
| SES group      | -0.040 | 0.002 | 0.46   | 0.61             | 0.052  | 0.003 | 0.39   | 0.54             | 0.185  | 0.004 | <0.001 | <b>0.01</b>      | 0.166  | 0.003 | <0.001 | <b>&lt;0.001</b> |
| Sex            | -0.015 | 0.002 | 0.78   | 0.91             | 0.022  | 0.003 | 0.70   | 0.91             | -0.112 | 0.003 | 0.04   | 0.24             | -0.088 | 0.003 | 0.05   | 0.24             |
| NICU stay      | -0.093 | 0.005 | 0.17   | 0.76             | -0.017 | 0.007 | 0.81   | 0.94             | -0.026 | 0.008 | 0.71   | 0.94             | 0.075  | 0.006 | 0.20   | 0.76             |
| GA at delivery | -0.084 | 0.001 | 0.26   | 0.77             | 0.114  | 0.001 | 0.14   | 0.69             | 0.016  | 0.001 | 0.83   | 0.96             | 0.114  | 0.001 | 0.07   | 0.69             |
| PMA at scan    | 0.431  | 0.001 | <0.001 | <b>&lt;0.001</b> | -0.239 | 0.001 | <0.001 | <b>&lt;0.001</b> | -0.339 | 0.001 | <0.001 | <b>&lt;0.001</b> | -0.659 | 0.001 | <0.001 | <b>&lt;0.001</b> |
| Maternal BMI   | 0.074  | 0.000 | 0.18   | 0.60             | 0.108  | 0.000 | 0.07   | 0.50             | 0.097  | 0.000 | 0.08   | 0.50             | 0.024  | 0.000 | 0.62   | 0.84             |
| IL-8:SES group | 0.101  | 0.003 | 0.14   | 0.95             | 0.020  | 0.004 | 0.79   | 0.95             | 0.102  | 0.004 | 0.15   | 0.95             | -0.010 | 0.003 | 0.86   | 0.96             |

**Fornix**

|                |        |       |        |                  |        |       |        |             |        |       |        |                  |        |       |        |                  |
|----------------|--------|-------|--------|------------------|--------|-------|--------|-------------|--------|-------|--------|------------------|--------|-------|--------|------------------|
| IL-8           | -0.041 | 0.001 | 0.56   | 0.94             | 0.092  | 0.003 | 0.23   | 0.94        | -0.029 | 0.003 | 0.66   | 0.94             | 0.026  | 0.002 | 0.65   | 0.94             |
| SES group      | -0.086 | 0.002 | 0.12   | 0.24             | -0.017 | 0.004 | 0.78   | 0.86        | 0.064  | 0.004 | 0.22   | 0.40             | 0.109  | 0.003 | 0.02   | 0.06             |
| Sex            | -0.093 | 0.002 | 0.08   | 0.24             | 0.046  | 0.004 | 0.43   | 0.82        | -0.077 | 0.004 | 0.13   | 0.32             | 0.007  | 0.003 | 0.88   | 0.93             |
| NICU stay      | 0.011  | 0.004 | 0.87   | 0.94             | -0.065 | 0.008 | 0.38   | 0.76        | 0.011  | 0.009 | 0.87   | 0.94             | 0.011  | 0.006 | 0.85   | 0.94             |
| GA at delivery | 0.053  | 0.001 | 0.49   | 0.96             | -0.005 | 0.001 | 0.95   | 0.96        | 0.065  | 0.001 | 0.37   | 0.96             | 0.012  | 0.001 | 0.85   | 0.96             |
| PMA at scan    | 0.350  | 0.001 | <0.001 | <b>&lt;0.001</b> | -0.182 | 0.001 | <0.001 | <b>0.01</b> | -0.508 | 0.001 | <0.001 | <b>&lt;0.001</b> | -0.650 | 0.001 | <0.001 | <b>&lt;0.001</b> |
| Maternal BMI   | -0.017 | 0.000 | 0.76   | 0.89             | 0.015  | 0.000 | 0.80   | 0.89        | 0.061  | 0.000 | 0.25   | 0.74             | 0.052  | 0.000 | 0.27   | 0.74             |
| IL-8:SES group | 0.027  | 0.002 | 0.70   | 0.95             | -0.049 | 0.004 | 0.52   | 0.95        | 0.043  | 0.005 | 0.52   | 0.95             | 0.003  | 0.003 | 0.96   | 0.96             |

**IL-10**

|  | FA      |    |     |     | MD      |    |     |     | AD      |    |     |     | RD      |    |     |     |
|--|---------|----|-----|-----|---------|----|-----|-----|---------|----|-----|-----|---------|----|-----|-----|
|  | $\beta$ | SE | $p$ | $q$ | $\beta$ | SE | $p$ | $q$ | $\beta$ | SE | $p$ | $q$ | $\beta$ | SE | $p$ | $q$ |

**Corpus Callosum**

|       |        |       |      |      |       |       |      |      |        |       |      |      |       |       |      |      |
|-------|--------|-------|------|------|-------|-------|------|------|--------|-------|------|------|-------|-------|------|------|
| IL-10 | -0.077 | 0.002 | 0.22 | 0.46 | 0.019 | 0.003 | 0.80 | 0.92 | -0.059 | 0.003 | 0.42 | 0.63 | 0.106 | 0.003 | 0.07 | 0.24 |
|-------|--------|-------|------|------|-------|-------|------|------|--------|-------|------|------|-------|-------|------|------|

|                                             |        |       |        |                  |        |       |        |                  |        |       |        |                  |        |       |        |                  |
|---------------------------------------------|--------|-------|--------|------------------|--------|-------|--------|------------------|--------|-------|--------|------------------|--------|-------|--------|------------------|
| SES group                                   | 0.093  | 0.003 | 0.07   | 0.18             | -0.045 | 0.004 | 0.46   | 0.64             | 0.142  | 0.004 | 0.02   | 0.08             | -0.049 | 0.004 | 0.31   | 0.51             |
| Sex                                         | -0.098 | 0.003 | 0.05   | 0.23             | -0.048 | 0.004 | 0.41   | 0.78             | -0.083 | 0.003 | 0.16   | 0.36             | 0.045  | 0.004 | 0.34   | 0.73             |
| NICU stay                                   | -0.146 | 0.007 | 0.02   | 0.23             | -0.044 | 0.009 | 0.55   | 0.77             | -0.010 | 0.008 | 0.89   | 0.99             | 0.063  | 0.010 | 0.29   | 0.71             |
| GA at delivery                              | 0.005  | 0.001 | 0.94   | 0.96             | 0.011  | 0.001 | 0.89   | 0.94             | 0.118  | 0.001 | 0.14   | 0.72             | -0.015 | 0.002 | 0.82   | 0.94             |
| PMA at scan                                 | 0.462  | 0.001 | <0.001 | <b>&lt;0.001</b> | -0.150 | 0.001 | 0.02   | <b>0.02</b>      | -0.230 | 0.001 | <0.001 | <b>&lt;0.001</b> | -0.560 | 0.002 | <0.001 | <b>&lt;0.001</b> |
| Maternal BMI                                | 0.052  | 0.000 | 0.31   | 0.73             | 0.088  | 0.000 | 0.15   | 0.62             | 0.038  | 0.000 | 0.52   | 0.77             | -0.041 | 0.000 | 0.39   | 0.77             |
| IL-10:SES group                             | -0.102 | 0.004 | 0.10   | 0.86             | 0.099  | 0.005 | 0.18   | 0.86             | -0.011 | 0.004 | 0.88   | 0.98             | 0.070  | 0.005 | 0.24   | 0.86             |
| <b>Superior Cingulum Bundle</b>             |        |       |        |                  |        |       |        |                  |        |       |        |                  |        |       |        |                  |
| IL-10                                       | -0.057 | 0.002 | 0.41   | 0.63             | 0.068  | 0.004 | 0.36   | 0.62             | 0.011  | 0.004 | 0.87   | 0.92             | 0.037  | 0.004 | 0.56   | 0.74             |
| SES group                                   | -0.109 | 0.003 | 0.06   | 0.16             | 0.004  | 0.005 | 0.95   | 0.97             | 0.063  | 0.005 | 0.27   | 0.46             | 0.151  | 0.005 | <0.001 | <b>0.03</b>      |
| Sex                                         | -0.085 | 0.003 | 0.12   | 0.32             | 0.022  | 0.005 | 0.70   | 0.92             | -0.144 | 0.005 | 0.01   | 0.10             | -0.020 | 0.005 | 0.70   | 0.92             |
| NICU stay                                   | -0.043 | 0.006 | 0.55   | 0.77             | -0.136 | 0.012 | 0.07   | 0.39             | 0.067  | 0.012 | 0.33   | 0.75             | 0.085  | 0.011 | 0.19   | 0.67             |
| GA at delivery                              | 0.023  | 0.001 | 0.76   | 0.94             | -0.020 | 0.002 | 0.80   | 0.94             | 0.096  | 0.002 | 0.20   | 0.72             | 0.057  | 0.002 | 0.41   | 0.93             |
| PMA at scan                                 | 0.351  | 0.001 | <0.001 | <b>&lt;0.001</b> | -0.124 | 0.002 | 0.05   | 0.05             | -0.423 | 0.002 | <0.001 | <b>&lt;0.001</b> | -0.526 | 0.002 | <0.001 | <b>&lt;0.001</b> |
| Maternal BMI                                | -0.033 | 0.000 | 0.56   | 0.78             | 0.059  | 0.000 | 0.33   | 0.73             | -0.020 | 0.000 | 0.72   | 0.85             | 0.010  | 0.000 | 0.84   | 0.87             |
| IL-10:SES group                             | 0.091  | 0.004 | 0.19   | 0.86             | 0.050  | 0.006 | 0.50   | 0.97             | 0.001  | 0.006 | 0.98   | 0.98             | -0.063 | 0.006 | 0.32   | 0.97             |
| <b>Corticospinal Tract</b>                  |        |       |        |                  |        |       |        |                  |        |       |        |                  |        |       |        |                  |
| IL-10                                       | -0.278 | 0.002 | <0.001 | <b>&lt;0.001</b> | 0.105  | 0.004 | 0.15   | 0.38             | -0.004 | 0.003 | 0.94   | 0.94             | 0.220  | 0.004 | <0.001 | <b>&lt;0.001</b> |
| SES group                                   | 0.046  | 0.003 | 0.33   | 0.51             | -0.038 | 0.006 | 0.52   | 0.70             | 0.225  | 0.004 | <0.001 | <b>&lt;0.001</b> | 0.064  | 0.005 | 0.14   | 0.26             |
| Sex                                         | -0.016 | 0.003 | 0.72   | 0.92             | 0.023  | 0.005 | 0.69   | 0.92             | -0.087 | 0.003 | 0.06   | 0.23             | -0.025 | 0.005 | 0.55   | 0.89             |
| NICU stay                                   | -0.062 | 0.006 | 0.28   | 0.71             | -0.040 | 0.012 | 0.58   | 0.78             | 0.036  | 0.008 | 0.54   | 0.77             | 0.038  | 0.011 | 0.47   | 0.77             |
| GA at delivery                              | 0.066  | 0.001 | 0.28   | 0.72             | 0.031  | 0.002 | 0.69   | 0.94             | 0.039  | 0.001 | 0.53   | 0.94             | -0.030 | 0.002 | 0.59   | 0.94             |
| PMA at scan                                 | 0.522  | 0.001 | <0.001 | <b>&lt;0.001</b> | -0.200 | 0.002 | <0.001 | <b>&lt;0.001</b> | -0.647 | 0.001 | <0.001 | <b>&lt;0.001</b> | -0.663 | 0.002 | <0.001 | <b>&lt;0.001</b> |
| Maternal BMI                                | 0.034  | 0.000 | 0.47   | 0.77             | 0.070  | 0.000 | 0.24   | 0.72             | -0.024 | 0.000 | 0.60   | 0.80             | -0.034 | 0.000 | 0.43   | 0.77             |
| IL-10:SES group                             | -0.031 | 0.003 | 0.59   | 0.97             | 0.075  | 0.007 | 0.30   | 0.97             | -0.038 | 0.004 | 0.51   | 0.97             | -0.003 | 0.006 | 0.96   | 0.98             |
| <b>Optic Radiation</b>                      |        |       |        |                  |        |       |        |                  |        |       |        |                  |        |       |        |                  |
| IL-10                                       | -0.096 | 0.002 | 0.11   | 0.31             | 0.120  | 0.005 | 0.10   | 0.30             | 0.160  | 0.004 | 0.01   | 0.08             | 0.159  | 0.004 | <0.001 | 0.05             |
| SES group                                   | 0.077  | 0.003 | 0.12   | 0.25             | 0.015  | 0.007 | 0.81   | 0.88             | 0.255  | 0.005 | <0.001 | <b>&lt;0.001</b> | 0.085  | 0.006 | 0.06   | 0.16             |
| Sex                                         | -0.010 | 0.003 | 0.83   | 0.94             | -0.013 | 0.006 | 0.82   | 0.94             | -0.194 | 0.005 | <0.001 | <b>0.01</b>      | -0.084 | 0.005 | 0.05   | 0.23             |
| NICU stay                                   | -0.185 | 0.007 | <0.001 | 0.10             | -0.060 | 0.014 | 0.41   | 0.77             | 0.017  | 0.011 | 0.80   | 0.99             | 0.150  | 0.013 | 0.01   | 0.13             |
| GA at delivery                              | -0.031 | 0.001 | 0.63   | 0.94             | 0.023  | 0.002 | 0.77   | 0.94             | -0.070 | 0.002 | 0.32   | 0.77             | -0.029 | 0.002 | 0.63   | 0.94             |
| PMA at scan                                 | 0.538  | 0.001 | <0.001 | <b>&lt;0.001</b> | -0.172 | 0.002 | 0.01   | <b>0.01</b>      | -0.350 | 0.002 | <0.001 | <b>&lt;0.001</b> | -0.623 | 0.002 | <0.001 | <b>&lt;0.001</b> |
| Maternal BMI                                | 0.010  | 0.000 | 0.84   | 0.87             | 0.135  | 0.000 | 0.02   | 0.33             | 0.117  | 0.000 | 0.03   | 0.33             | 0.060  | 0.000 | 0.18   | 0.66             |
| IL-10:SES group                             | 0.010  | 0.004 | 0.87   | 0.98             | -0.019 | 0.008 | 0.79   | 0.98             | -0.131 | 0.006 | 0.04   | 0.80             | -0.071 | 0.007 | 0.19   | 0.86             |
| <b>Uncinate Fasciculus</b>                  |        |       |        |                  |        |       |        |                  |        |       |        |                  |        |       |        |                  |
| IL-10                                       | -0.054 | 0.002 | 0.39   | 0.63             | -0.025 | 0.004 | 0.73   | 0.92             | -0.125 | 0.004 | 0.07   | 0.24             | -0.066 | 0.003 | 0.27   | 0.53             |
| SES group                                   | -0.024 | 0.003 | 0.65   | 0.75             | 0.025  | 0.005 | 0.68   | 0.77             | 0.128  | 0.005 | 0.03   | 0.08             | 0.109  | 0.005 | 0.03   | 0.08             |
| Sex                                         | -0.088 | 0.003 | 0.08   | 0.25             | 0.010  | 0.005 | 0.86   | 0.94             | -0.136 | 0.005 | 0.01   | 0.13             | -0.024 | 0.004 | 0.61   | 0.92             |
| NICU stay                                   | -0.069 | 0.006 | 0.27   | 0.71             | -0.001 | 0.011 | 0.99   | 0.99             | -0.083 | 0.012 | 0.24   | 0.71             | 0.002  | 0.010 | 0.97   | 0.99             |
| GA at delivery                              | 0.084  | 0.001 | 0.22   | 0.72             | 0.091  | 0.002 | 0.25   | 0.72             | 0.150  | 0.002 | 0.05   | 0.59             | 0.036  | 0.002 | 0.57   | 0.94             |
| PMA at scan                                 | 0.495  | 0.001 | <0.001 | <b>&lt;0.001</b> | -0.093 | 0.002 | 0.15   | 0.15             | -0.310 | 0.002 | <0.001 | <b>&lt;0.001</b> | -0.631 | 0.002 | <0.001 | <b>&lt;0.001</b> |
| Maternal BMI                                | 0.039  | 0.000 | 0.44   | 0.77             | 0.095  | 0.000 | 0.12   | 0.62             | 0.046  | 0.000 | 0.42   | 0.77             | 0.017  | 0.000 | 0.73   | 0.85             |
| IL-10:SES group                             | 0.003  | 0.003 | 0.96   | 0.98             | 0.037  | 0.006 | 0.62   | 0.97             | -0.029 | 0.006 | 0.68   | 0.97             | -0.017 | 0.006 | 0.77   | 0.98             |
| <b>Inferior Fronto-Occipital Fasciculus</b> |        |       |        |                  |        |       |        |                  |        |       |        |                  |        |       |        |                  |

|                 |        |       |        |                  |        |       |      |      |        |       |        |                  |        |       |        |                  |
|-----------------|--------|-------|--------|------------------|--------|-------|------|------|--------|-------|--------|------------------|--------|-------|--------|------------------|
| IL-10           | -0.136 | 0.002 | 0.01   | 0.08             | 0.056  | 0.005 | 0.45 | 0.64 | -0.014 | 0.003 | 0.82   | 0.92             | 0.097  | 0.004 | 0.07   | 0.24             |
| SES group       | 0.020  | 0.003 | 0.64   | 0.75             | 0.002  | 0.007 | 0.98 | 0.98 | 0.209  | 0.004 | <0.001 | <b>&lt;0.001</b> | 0.068  | 0.006 | 0.12   | 0.25             |
| Sex             | 0.002  | 0.003 | 0.95   | 0.98             | -0.002 | 0.006 | 0.98 | 0.98 | -0.175 | 0.004 | <0.001 | <b>0.01</b>      | -0.076 | 0.006 | 0.07   | 0.25             |
| NICU stay       | -0.116 | 0.007 | 0.03   | 0.30             | -0.043 | 0.014 | 0.56 | 0.77 | 0.042  | 0.008 | 0.52   | 0.77             | 0.102  | 0.013 | 0.06   | 0.39             |
| GA at delivery  | 0.065  | 0.001 | 0.26   | 0.72             | -0.012 | 0.002 | 0.88 | 0.94 | 0.106  | 0.001 | 0.13   | 0.72             | -0.023 | 0.002 | 0.68   | 0.94             |
| PMA at scan     | 0.623  | 0.001 | <0.001 | <b>&lt;0.001</b> | -0.118 | 0.002 | 0.06 | 0.07 | -0.476 | 0.001 | <0.001 | <b>&lt;0.001</b> | -0.678 | 0.002 | <0.001 | <b>&lt;0.001</b> |
| Maternal BMI    | 0.029  | 0.000 | 0.50   | 0.77             | 0.124  | 0.000 | 0.04 | 0.37 | 0.076  | 0.000 | 0.15   | 0.62             | 0.011  | 0.000 | 0.81   | 0.87             |
| IL-10:SES group | -0.005 | 0.004 | 0.92   | 0.98             | 0.061  | 0.008 | 0.41 | 0.97 | -0.019 | 0.005 | 0.76   | 0.98             | 0.005  | 0.007 | 0.93   | 0.98             |

**Anterior Limb of Internal Capsule**

|                 |        |       |        |                  |        |       |      |      |        |       |        |                  |        |       |        |                  |
|-----------------|--------|-------|--------|------------------|--------|-------|------|------|--------|-------|--------|------------------|--------|-------|--------|------------------|
| IL-10           | -0.143 | 0.002 | 0.01   | 0.08             | 0.023  | 0.005 | 0.76 | 0.92 | -0.090 | 0.004 | 0.18   | 0.42             | 0.041  | 0.005 | 0.47   | 0.66             |
| SES group       | 0.025  | 0.003 | 0.58   | 0.74             | 0.031  | 0.008 | 0.61 | 0.75 | 0.157  | 0.005 | <0.001 | <b>0.03</b>      | 0.074  | 0.007 | 0.12   | 0.25             |
| Sex             | -0.031 | 0.002 | 0.48   | 0.86             | -0.019 | 0.007 | 0.74 | 0.92 | -0.075 | 0.005 | 0.16   | 0.36             | -0.031 | 0.006 | 0.50   | 0.86             |
| NICU stay       | -0.070 | 0.006 | 0.20   | 0.67             | -0.062 | 0.016 | 0.40 | 0.77 | 0.060  | 0.011 | 0.38   | 0.77             | 0.082  | 0.015 | 0.16   | 0.65             |
| GA at delivery  | 0.127  | 0.001 | 0.03   | 0.59             | -0.023 | 0.003 | 0.77 | 0.94 | 0.117  | 0.002 | 0.11   | 0.72             | -0.026 | 0.002 | 0.68   | 0.94             |
| PMA at scan     | 0.588  | 0.001 | <0.001 | <b>&lt;0.001</b> | -0.096 | 0.003 | 0.13 | 0.13 | -0.469 | 0.002 | <0.001 | <b>&lt;0.001</b> | -0.621 | 0.002 | <0.001 | <b>&lt;0.001</b> |
| Maternal BMI    | 0.029  | 0.000 | 0.52   | 0.77             | 0.137  | 0.000 | 0.02 | 0.33 | -0.010 | 0.000 | 0.86   | 0.87             | -0.008 | 0.000 | 0.87   | 0.87             |
| IL-10:SES group | 0.001  | 0.003 | 0.98   | 0.98             | 0.088  | 0.009 | 0.23 | 0.86 | 0.049  | 0.006 | 0.47   | 0.97             | 0.025  | 0.008 | 0.66   | 0.97             |

**Inferior Cingulum Bundle**

|                 |        |       |        |                  |        |       |        |                  |        |       |        |                  |        |       |        |                  |
|-----------------|--------|-------|--------|------------------|--------|-------|--------|------------------|--------|-------|--------|------------------|--------|-------|--------|------------------|
| IL-10           | -0.019 | 0.002 | 0.78   | 0.92             | 0.092  | 0.002 | 0.21   | 0.46             | 0.143  | 0.003 | 0.04   | 0.18             | 0.131  | 0.002 | 0.02   | 0.13             |
| SES group       | -0.043 | 0.002 | 0.44   | 0.63             | 0.057  | 0.003 | 0.34   | 0.51             | 0.159  | 0.004 | 0.01   | <b>0.03</b>      | 0.147  | 0.003 | <0.001 | <b>0.02</b>      |
| Sex             | -0.010 | 0.002 | 0.85   | 0.94             | 0.021  | 0.003 | 0.72   | 0.92             | -0.110 | 0.003 | 0.05   | 0.23             | -0.097 | 0.003 | 0.04   | 0.23             |
| NICU stay       | -0.108 | 0.005 | 0.12   | 0.61             | -0.008 | 0.007 | 0.92   | 0.99             | -0.027 | 0.008 | 0.70   | 0.90             | 0.088  | 0.007 | 0.14   | 0.61             |
| GA at delivery  | -0.098 | 0.001 | 0.18   | 0.72             | 0.111  | 0.001 | 0.15   | 0.72             | 0.013  | 0.001 | 0.87   | 0.94             | 0.130  | 0.001 | 0.04   | 0.59             |
| PMA at scan     | 0.423  | 0.001 | <0.001 | <b>&lt;0.001</b> | -0.233 | 0.001 | <0.001 | <b>&lt;0.001</b> | -0.327 | 0.001 | <0.001 | <b>&lt;0.001</b> | -0.649 | 0.001 | <0.001 | <b>&lt;0.001</b> |
| Maternal BMI    | 0.057  | 0.000 | 0.31   | 0.73             | 0.113  | 0.000 | 0.06   | 0.43             | 0.083  | 0.000 | 0.15   | 0.62             | 0.029  | 0.000 | 0.54   | 0.77             |
| IL-10:SES group | -0.063 | 0.003 | 0.36   | 0.97             | -0.035 | 0.004 | 0.63   | 0.97             | -0.164 | 0.004 | 0.02   | 0.67             | -0.079 | 0.004 | 0.17   | 0.86             |

**Fornix**

|                 |        |       |        |                  |        |       |        |             |        |       |        |                  |        |       |        |                  |
|-----------------|--------|-------|--------|------------------|--------|-------|--------|-------------|--------|-------|--------|------------------|--------|-------|--------|------------------|
| IL-10           | -0.075 | 0.001 | 0.28   | 0.53             | -0.009 | 0.003 | 0.90   | 0.93        | -0.013 | 0.003 | 0.84   | 0.92             | 0.053  | 0.002 | 0.36   | 0.62             |
| SES group       | -0.088 | 0.002 | 0.13   | 0.25             | -0.006 | 0.004 | 0.92   | 0.97        | 0.062  | 0.004 | 0.25   | 0.46             | 0.110  | 0.003 | 0.02   | 0.08             |
| Sex             | -0.088 | 0.002 | 0.11   | 0.31             | 0.048  | 0.004 | 0.41   | 0.78        | -0.089 | 0.004 | 0.09   | 0.28             | -0.007 | 0.003 | 0.89   | 0.94             |
| NICU stay       | 0.005  | 0.004 | 0.95   | 0.99             | -0.051 | 0.008 | 0.49   | 0.77        | 0.006  | 0.009 | 0.93   | 0.99             | 0.013  | 0.007 | 0.82   | 0.99             |
| GA at delivery  | 0.056  | 0.001 | 0.46   | 0.94             | -0.004 | 0.001 | 0.96   | 0.96        | 0.078  | 0.001 | 0.28   | 0.72             | 0.018  | 0.001 | 0.78   | 0.94             |
| PMA at scan     | 0.346  | 0.001 | <0.001 | <b>&lt;0.001</b> | -0.182 | 0.001 | <0.001 | <b>0.01</b> | -0.501 | 0.001 | <0.001 | <b>&lt;0.001</b> | -0.645 | 0.001 | <0.001 | <b>&lt;0.001</b> |
| Maternal BMI    | -0.022 | 0.000 | 0.70   | 0.85             | 0.025  | 0.000 | 0.68   | 0.85        | 0.060  | 0.000 | 0.26   | 0.73             | 0.057  | 0.000 | 0.23   | 0.72             |
| IL-10:SES group | 0.054  | 0.002 | 0.43   | 0.97             | 0.092  | 0.004 | 0.21   | 0.86        | 0.029  | 0.005 | 0.65   | 0.97             | -0.031 | 0.004 | 0.60   | 0.97             |

**TNF- $\alpha$**

|                        | FA      |       |      |      | MD      |       |      |      | AD      |       |      |             | RD      |       |      |      |  |
|------------------------|---------|-------|------|------|---------|-------|------|------|---------|-------|------|-------------|---------|-------|------|------|--|
|                        | $\beta$ | SE    | p    | q    | $\beta$ | SE    | p    | q    | $\beta$ | SE    | p    | q           | $\beta$ | SE    | p    | q    |  |
| <b>Corpus Callosum</b> |         |       |      |      |         |       |      |      |         |       |      |             |         |       |      |      |  |
| TNF- $\alpha$          | 0.058   | 0.003 | 0.37 | 0.76 | 0.039   | 0.003 | 0.59 | 0.82 | -0.114  | 0.003 | 0.12 | 0.43        | -0.075  | 0.003 | 0.22 | 0.59 |  |
| SES group              | 0.096   | 0.003 | 0.06 | 0.17 | -0.053  | 0.004 | 0.39 | 0.56 | 0.156   | 0.004 | 0.01 | <b>0.03</b> | -0.049  | 0.005 | 0.32 | 0.50 |  |
| Sex                    | -0.099  | 0.003 | 0.05 | 0.19 | -0.062  | 0.004 | 0.30 | 0.63 | -0.099  | 0.003 | 0.08 | 0.21        | 0.039   | 0.004 | 0.41 | 0.83 |  |
| NICU stay              | -0.112  | 0.007 | 0.08 | 0.71 | -0.061  | 0.009 | 0.41 | 0.71 | 0.007   | 0.008 | 0.93 | 0.99        | 0.035   | 0.010 | 0.57 | 0.85 |  |
| GA at delivery         | 0.006   | 0.001 | 0.93 | 0.96 | 0.011   | 0.001 | 0.89 | 0.96 | 0.121   | 0.001 | 0.13 | 0.71        | -0.019  | 0.002 | 0.78 | 0.96 |  |



|                                             |        |       |        |                  |        |       |        |                  |        |       |        |                  |        |       |        |                  |
|---------------------------------------------|--------|-------|--------|------------------|--------|-------|--------|------------------|--------|-------|--------|------------------|--------|-------|--------|------------------|
| PMA at scan                                 | 0.451  | 0.001 | <0.001 | <b>&lt;0.001</b> | -0.158 | 0.001 | 0.01   | <b>0.02</b>      | -0.240 | 0.001 | <0.001 | <b>&lt;0.001</b> | -0.559 | 0.002 | <0.001 | <b>&lt;0.001</b> |
| Maternal BMI                                | 0.051  | 0.000 | 0.32   | 0.71             | 0.090  | 0.000 | 0.14   | 0.51             | 0.040  | 0.000 | 0.50   | 0.78             | -0.038 | 0.000 | 0.44   | 0.71             |
| TNF $\alpha$ :SES group                     | -0.070 | 0.004 | 0.27   | 0.62             | -0.042 | 0.005 | 0.57   | 0.75             | 0.071  | 0.004 | 0.33   | 0.64             | 0.055  | 0.005 | 0.37   | 0.64             |
| <b>Superior Cingulum Bundle</b>             |        |       |        |                  |        |       |        |                  |        |       |        |                  |        |       |        |                  |
| TNF- $\alpha$                               | 0.005  | 0.002 | 0.94   | 0.99             | 0.048  | 0.004 | 0.52   | 0.76             | -0.122 | 0.004 | 0.07   | 0.33             | -0.082 | 0.004 | 0.20   | 0.59             |
| SES group                                   | -0.134 | 0.003 | 0.02   | 0.05             | -0.004 | 0.005 | 0.95   | 0.95             | 0.058  | 0.005 | 0.29   | 0.47             | 0.167  | 0.005 | <0.01  | <b>0.01</b>      |
| Sex                                         | -0.106 | 0.003 | 0.05   | 0.19             | 0.016  | 0.005 | 0.78   | 0.90             | -0.126 | 0.005 | 0.02   | 0.17             | 0.012  | 0.005 | 0.81   | 0.90             |
| NICU stay                                   | -0.056 | 0.006 | 0.43   | 0.71             | -0.154 | 0.012 | 0.04   | 0.48             | 0.056  | 0.011 | 0.41   | 0.71             | 0.093  | 0.011 | 0.15   | 0.71             |
| GA at delivery                              | 0.036  | 0.001 | 0.64   | 0.96             | -0.021 | 0.002 | 0.79   | 0.96             | 0.087  | 0.002 | 0.24   | 0.84             | 0.038  | 0.002 | 0.59   | 0.96             |
| PMA at scan                                 | 0.350  | 0.001 | <0.001 | <b>&lt;0.001</b> | -0.134 | 0.002 | 0.04   | <b>0.04</b>      | -0.409 | 0.002 | <0.001 | <b>&lt;0.001</b> | -0.513 | 0.002 | <0.001 | <b>&lt;0.001</b> |
| Maternal BMI                                | -0.031 | 0.000 | 0.58   | 0.87             | 0.054  | 0.000 | 0.37   | 0.71             | -0.043 | 0.000 | 0.43   | 0.71             | -0.008 | 0.000 | 0.87   | 0.90             |
| TNF $\alpha$ :SES group                     | 0.013  | 0.004 | 0.85   | 0.92             | -0.028 | 0.007 | 0.71   | 0.82             | 0.228  | 0.006 | 0.00   | 0.03             | 0.128  | 0.006 | 0.05   | 0.27             |
| <b>Corticospinal Tract</b>                  |        |       |        |                  |        |       |        |                  |        |       |        |                  |        |       |        |                  |
| TNF- $\alpha$                               | -0.022 | 0.002 | 0.73   | 0.90             | 0.063  | 0.004 | 0.39   | 0.76             | -0.069 | 0.003 | 0.23   | 0.59             | -0.017 | 0.004 | 0.76   | 0.91             |
| SES group                                   | 0.070  | 0.003 | 0.16   | 0.31             | -0.048 | 0.006 | 0.43   | 0.59             | 0.229  | 0.004 | <0.001 | <b>&lt;0.001</b> | 0.048  | 0.005 | 0.28   | 0.47             |
| Sex                                         | -0.008 | 0.003 | 0.87   | 0.90             | 0.011  | 0.005 | 0.85   | 0.90             | -0.083 | 0.003 | 0.06   | 0.19             | -0.029 | 0.005 | 0.51   | 0.87             |
| NICU stay                                   | 0.002  | 0.007 | 0.98   | 0.99             | -0.068 | 0.012 | 0.35   | 0.71             | 0.044  | 0.008 | 0.45   | 0.71             | 0.001  | 0.011 | 0.98   | 0.99             |
| GA at delivery                              | 0.056  | 0.001 | 0.41   | 0.96             | 0.030  | 0.002 | 0.70   | 0.96             | 0.029  | 0.001 | 0.64   | 0.96             | -0.015 | 0.002 | 0.80   | 0.96             |
| PMA at scan                                 | 0.520  | 0.001 | <0.001 | <b>&lt;0.001</b> | -0.217 | 0.002 | <0.001 | <b>&lt;0.001</b> | -0.649 | 0.001 | <0.001 | <b>&lt;0.001</b> | -0.670 | 0.002 | <0.001 | <b>&lt;0.001</b> |
| Maternal BMI                                | 0.042  | 0.000 | 0.40   | 0.71             | 0.064  | 0.000 | 0.29   | 0.71             | -0.013 | 0.000 | 0.78   | 0.87             | -0.035 | 0.000 | 0.43   | 0.71             |
| TNF $\alpha$ :SES group                     | -0.023 | 0.004 | 0.71   | 0.82             | -0.101 | 0.007 | 0.17   | 0.54             | 0.051  | 0.004 | 0.37   | 0.64             | 0.048  | 0.006 | 0.39   | 0.65             |
| <b>Optic Radiation</b>                      |        |       |        |                  |        |       |        |                  |        |       |        |                  |        |       |        |                  |
| TNF- $\alpha$                               | -0.039 | 0.002 | 0.52   | 0.76             | -0.001 | 0.005 | 0.99   | 0.99             | 0.001  | 0.004 | 0.99   | 0.99             | 0.022  | 0.004 | 0.70   | 0.90             |
| SES group                                   | 0.090  | 0.003 | 0.07   | 0.17             | 0.016  | 0.007 | 0.80   | 0.90             | 0.266  | 0.005 | <0.001 | <b>&lt;0.001</b> | 0.081  | 0.006 | 0.07   | 0.18             |
| Sex                                         | -0.023 | 0.003 | 0.64   | 0.90             | -0.016 | 0.006 | 0.79   | 0.90             | -0.211 | 0.005 | <0.001 | <b>&lt;0.001</b> | -0.085 | 0.005 | 0.05   | 0.19             |
| NICU stay                                   | -0.161 | 0.007 | 0.01   | 0.34             | -0.070 | 0.014 | 0.34   | 0.71             | -0.011 | 0.011 | 0.87   | 0.99             | 0.117  | 0.013 | 0.04   | 0.48             |
| GA at delivery                              | -0.031 | 0.001 | 0.65   | 0.96             | 0.028  | 0.002 | 0.72   | 0.96             | -0.060 | 0.002 | 0.40   | 0.96             | -0.027 | 0.002 | 0.66   | 0.96             |
| PMA at scan                                 | 0.534  | 0.001 | <0.001 | <b>&lt;0.001</b> | -0.173 | 0.002 | 0.01   | <b>0.01</b>      | -0.343 | 0.002 | <0.001 | <b>&lt;0.001</b> | -0.622 | 0.002 | <0.001 | <b>&lt;0.001</b> |
| Maternal BMI                                | 0.006  | 0.000 | 0.90   | 0.90             | 0.131  | 0.000 | 0.03   | 0.37             | 0.137  | 0.000 | 0.01   | 0.35             | 0.073  | 0.000 | 0.11   | 0.51             |
| TNF $\alpha$ :SES group                     | 0.010  | 0.004 | 0.87   | 0.92             | -0.025 | 0.008 | 0.73   | 0.82             | 0.005  | 0.006 | 0.94   | 0.96             | 0.000  | 0.007 | 1.00   | 1.00             |
| <b>Uncinate Fasciculus</b>                  |        |       |        |                  |        |       |        |                  |        |       |        |                  |        |       |        |                  |
| TNF- $\alpha$                               | -0.145 | 0.002 | 0.02   | 0.14             | 0.070  | 0.004 | 0.34   | 0.76             | -0.118 | 0.004 | 0.09   | 0.38             | 0.039  | 0.003 | 0.51   | 0.76             |
| SES group                                   | -0.008 | 0.003 | 0.86   | 0.94             | 0.023  | 0.005 | 0.71   | 0.82             | 0.154  | 0.005 | 0.01   | <b>0.03</b>      | 0.114  | 0.005 | 0.02   | 0.05             |
| Sex                                         | -0.089 | 0.002 | 0.06   | 0.19             | 0.012  | 0.005 | 0.84   | 0.90             | -0.125 | 0.005 | 0.02   | 0.17             | -0.013 | 0.004 | 0.77   | 0.90             |
| NICU stay                                   | -0.057 | 0.006 | 0.36   | 0.71             | -0.008 | 0.011 | 0.91   | 0.99             | -0.066 | 0.011 | 0.35   | 0.71             | 0.009  | 0.010 | 0.89   | 0.99             |
| GA at delivery                              | 0.074  | 0.001 | 0.27   | 0.84             | 0.085  | 0.002 | 0.28   | 0.84             | 0.130  | 0.002 | 0.09   | 0.71             | 0.029  | 0.002 | 0.65   | 0.96             |
| PMA at scan                                 | 0.505  | 0.001 | <0.001 | <b>&lt;0.001</b> | -0.107 | 0.002 | 0.09   | 0.09             | -0.310 | 0.002 | <0.001 | <b>&lt;0.001</b> | -0.636 | 0.002 | <0.001 | <b>&lt;0.001</b> |
| Maternal BMI                                | 0.038  | 0.000 | 0.44   | 0.71             | 0.090  | 0.000 | 0.14   | 0.51             | 0.047  | 0.000 | 0.40   | 0.71             | 0.018  | 0.000 | 0.71   | 0.87             |
| TNF $\alpha$ :SES group                     | 0.034  | 0.003 | 0.58   | 0.75             | -0.153 | 0.006 | 0.04   | 0.27             | -0.054 | 0.006 | 0.44   | 0.67             | -0.068 | 0.005 | 0.25   | 0.60             |
| <b>Inferior Fronto-Occipital Fasciculus</b> |        |       |        |                  |        |       |        |                  |        |       |        |                  |        |       |        |                  |
| TNF- $\alpha$                               | 0.035  | 0.002 | 0.53   | 0.76             | 0.027  | 0.005 | 0.71   | 0.90             | -0.075 | 0.003 | 0.25   | 0.60             | -0.069 | 0.004 | 0.20   | 0.59             |
| SES group                                   | 0.019  | 0.003 | 0.66   | 0.80             | -0.004 | 0.007 | 0.95   | 0.95             | 0.222  | 0.004 | <0.001 | <b>&lt;0.001</b> | 0.073  | 0.006 | 0.09   | 0.20             |
| Sex                                         | 0.003  | 0.003 | 0.94   | 0.94             | -0.009 | 0.006 | 0.87   | 0.90             | -0.175 | 0.003 | <0.001 | <b>0.01</b>      | -0.076 | 0.006 | 0.07   | 0.20             |

|                                          |        |       |        |                  |        |       |        |                  |        |       |        |                  |        |       |        |                  |
|------------------------------------------|--------|-------|--------|------------------|--------|-------|--------|------------------|--------|-------|--------|------------------|--------|-------|--------|------------------|
| NICU stay                                | -0.083 | 0.007 | 0.14   | 0.71             | -0.059 | 0.014 | 0.42   | 0.71             | 0.035  | 0.008 | 0.59   | 0.85             | 0.072  | 0.013 | 0.19   | 0.71             |
| GA at delivery                           | 0.074  | 0.001 | 0.22   | 0.84             | -0.014 | 0.002 | 0.86   | 0.96             | 0.102  | 0.001 | 0.15   | 0.71             | -0.034 | 0.002 | 0.56   | 0.96             |
| PMA at scan                              | 0.612  | 0.001 | <0.001 | <b>&lt;0.001</b> | -0.128 | 0.002 | 0.04   | 0.05             | -0.478 | 0.001 | <0.001 | <b>&lt;0.001</b> | -0.669 | 0.002 | <0.001 | <b>&lt;0.001</b> |
| Maternal BMI                             | 0.018  | 0.000 | 0.69   | 0.87             | 0.121  | 0.000 | 0.05   | 0.43             | 0.078  | 0.000 | 0.14   | 0.51             | 0.019  | 0.000 | 0.66   | 0.87             |
| TNF $\alpha$ :SES group                  | -0.055 | 0.004 | 0.32   | 0.64             | -0.091 | 0.008 | 0.22   | 0.56             | 0.089  | 0.004 | 0.17   | 0.54             | 0.079  | 0.007 | 0.15   | 0.54             |
| <b>Anterior Limb of Internal Capsule</b> |        |       |        |                  |        |       |        |                  |        |       |        |                  |        |       |        |                  |
| TNF- $\alpha$                            | 0.044  | 0.002 | 0.43   | 0.76             | 0.002  | 0.006 | 0.98   | 0.99             | -0.164 | 0.004 | 0.01   | 0.13             | -0.122 | 0.005 | 0.03   | 0.20             |
| SES group                                | 0.028  | 0.003 | 0.54   | 0.72             | 0.027  | 0.008 | 0.66   | 0.80             | 0.168  | 0.005 | <0.001 | <b>0.01</b>      | 0.077  | 0.007 | 0.09   | 0.20             |
| Sex                                      | -0.019 | 0.002 | 0.65   | 0.90             | -0.027 | 0.007 | 0.64   | 0.90             | -0.064 | 0.005 | 0.22   | 0.49             | -0.032 | 0.006 | 0.47   | 0.85             |
| NICU stay                                | -0.044 | 0.006 | 0.43   | 0.71             | -0.077 | 0.016 | 0.29   | 0.71             | 0.066  | 0.011 | 0.33   | 0.71             | 0.068  | 0.014 | 0.24   | 0.71             |
| GA at delivery                           | 0.134  | 0.001 | 0.03   | 0.71             | -0.031 | 0.003 | 0.69   | 0.96             | 0.103  | 0.002 | 0.16   | 0.71             | -0.038 | 0.002 | 0.55   | 0.96             |
| PMA at scan                              | 0.589  | 0.001 | <0.001 | <b>&lt;0.001</b> | -0.107 | 0.003 | 0.09   | 0.09             | -0.462 | 0.002 | <0.001 | <b>&lt;0.001</b> | -0.618 | 0.002 | <0.001 | <b>&lt;0.001</b> |
| Maternal BMI                             | 0.023  | 0.000 | 0.61   | 0.87             | 0.132  | 0.000 | 0.03   | 0.37             | -0.014 | 0.000 | 0.80   | 0.87             | -0.007 | 0.000 | 0.89   | 0.90             |
| TNF $\alpha$ :SES group                  | -0.042 | 0.003 | 0.45   | 0.67             | -0.102 | 0.009 | 0.16   | 0.54             | 0.137  | 0.006 | 0.04   | 0.27             | 0.100  | 0.008 | 0.08   | 0.42             |
| <b>Inferior Cingulum Bundle</b>          |        |       |        |                  |        |       |        |                  |        |       |        |                  |        |       |        |                  |
| TNF- $\alpha$                            | -0.180 | 0.002 | 0.01   | 0.10             | 0.051  | 0.002 | 0.48   | 0.76             | -0.213 | 0.003 | <0.01  | 0.07             | 0.010  | 0.002 | 0.87   | 0.98             |
| SES group                                | -0.031 | 0.002 | 0.56   | 0.72             | 0.058  | 0.003 | 0.33   | 0.50             | 0.191  | 0.003 | <0.01  | <b>&lt;0.001</b> | 0.162  | 0.003 | <0.001 | <b>&lt;0.001</b> |
| Sex                                      | -0.024 | 0.002 | 0.65   | 0.90             | 0.024  | 0.003 | 0.68   | 0.90             | -0.121 | 0.003 | 0.02   | 0.17             | -0.087 | 0.003 | 0.06   | 0.19             |
| NICU stay                                | -0.101 | 0.005 | 0.14   | 0.71             | -0.014 | 0.007 | 0.85   | 0.99             | -0.030 | 0.008 | 0.66   | 0.91             | 0.077  | 0.006 | 0.19   | 0.71             |
| GA at delivery                           | -0.110 | 0.001 | 0.14   | 0.71             | 0.119  | 0.001 | 0.13   | 0.71             | -0.003 | 0.001 | 0.96   | 0.96             | 0.121  | 0.001 | 0.06   | 0.71             |
| PMA at scan                              | 0.440  | 0.001 | <0.001 | <b>&lt;0.001</b> | -0.236 | 0.001 | <0.001 | <b>&lt;0.001</b> | -0.325 | 0.001 | <0.01  | <b>&lt;0.001</b> | -0.654 | 0.001 | <0.001 | <b>&lt;0.001</b> |
| Maternal BMI                             | 0.067  | 0.000 | 0.22   | 0.71             | 0.108  | 0.000 | 0.07   | 0.51             | 0.087  | 0.000 | 0.11   | 0.51             | 0.023  | 0.000 | 0.63   | 0.87             |
| TNF $\alpha$ :SES group                  | 0.091  | 0.003 | 0.18   | 0.54             | -0.041 | 0.004 | 0.58   | 0.75             | 0.207  | 0.004 | <0.001 | <b>0.04</b>      | 0.055  | 0.004 | 0.35   | 0.64             |
| <b>Fornix</b>                            |        |       |        |                  |        |       |        |                  |        |       |        |                  |        |       |        |                  |
| TNF- $\alpha$                            | -0.016 | 0.001 | 0.81   | 0.95             | 0.047  | 0.003 | 0.53   | 0.76             | -0.179 | 0.003 | 0.01   | 0.10             | -0.118 | 0.002 | 0.04   | 0.22             |
| SES group                                | -0.087 | 0.002 | 0.12   | 0.24             | -0.006 | 0.004 | 0.92   | 0.95             | 0.067  | 0.004 | 0.20   | 0.36             | 0.112  | 0.003 | 0.02   | 0.05             |
| Sex                                      | -0.104 | 0.002 | 0.06   | 0.19             | 0.045  | 0.004 | 0.45   | 0.85             | -0.082 | 0.004 | 0.11   | 0.26             | 0.011  | 0.003 | 0.81   | 0.90             |
| NICU stay                                | -0.001 | 0.004 | 0.99   | 0.99             | -0.055 | 0.008 | 0.45   | 0.71             | 0.013  | 0.009 | 0.85   | 0.99             | 0.022  | 0.006 | 0.71   | 0.94             |
| GA at delivery                           | 0.045  | 0.001 | 0.55   | 0.96             | 0.004  | 0.001 | 0.96   | 0.96             | 0.050  | 0.001 | 0.48   | 0.96             | 0.005  | 0.001 | 0.94   | 0.96             |
| PMA at scan                              | 0.350  | 0.001 | <0.001 | <b>&lt;0.001</b> | -0.184 | 0.001 | <0.001 | <b>&lt;0.001</b> | -0.498 | 0.001 | <0.001 | <b>&lt;0.001</b> | -0.647 | 0.001 | <0.001 | <b>&lt;0.001</b> |
| Maternal BMI                             | -0.015 | 0.000 | 0.79   | 0.87             | 0.020  | 0.000 | 0.75   | 0.87             | 0.054  | 0.000 | 0.30   | 0.71             | 0.046  | 0.000 | 0.32   | 0.71             |
| TNF $\alpha$ :SES group                  | 0.034  | 0.002 | 0.62   | 0.77             | -0.048 | 0.005 | 0.51   | 0.73             | 0.171  | 0.005 | 0.01   | 0.11             | 0.074  | 0.004 | 0.20   | 0.55             |

$\beta$ , standardized beta coefficient; SE, standard error;  $q$ , FDR-corrected p-value; IL, interleukin; TNF- $\alpha$ , tumor necrosis factor alpha; FA, fractional anisotropy; MD, mean diffusivity; AD, axial diffusivity; RD, radial diffusivity; GA, gestational age; PMA, infant postmenstrual age; SES, socioeconomic status.

The relationship between maternal cytokine concentrations by trimester and neonatal dMRI parameters were examined with multiple linear regressions. As shown in Table S2, there was a negative relationship between maternal IL-6 at T2 and FA in the CST and OR. At T3, there was a negative relationship between maternal IL-6 and 1) FA in the CST; 2) MD in the UF and FX; and 3) AD in the CST, UF, IFOF, ALIC, CBIF, and FX. For maternal IL-10 at T2, there was a 1) negative relationship with FA in the CC, CST, IFOF, ALIC, and CBIF; 2) a positive relationship with MD in the CST; 3) and a positive relationship with RD in the CC, CST, OR, and CBIF. For maternal IL-10 at T3, there was a negative relationship FA in the CST and AD in the UF, but a positive relationship with RD in the CST. For maternal TNF- $\alpha$  at T2, there was a negative relationship with FA in the CBIF.

**Table S4.** Multiple linear regression results of the association between maternal cytokine concentrations by trimester and neonatal dMRI parameters.

|                                 | FA      |       |          |                  | MD      |       |          |                  | AD      |       |          |                  | RD      |       |          |                  |
|---------------------------------|---------|-------|----------|------------------|---------|-------|----------|------------------|---------|-------|----------|------------------|---------|-------|----------|------------------|
|                                 | $\beta$ | SE    | <i>p</i> | <i>q</i>         | $\beta$ | SE    | <i>p</i> | <i>q</i>         | $\beta$ | SE    | <i>p</i> | <i>q</i>         | $\beta$ | SE    | <i>p</i> | <i>q</i>         |
| <b>IL-6 Trimester 1</b>         |         |       |          |                  |         |       |          |                  |         |       |          |                  |         |       |          |                  |
| <b>Corpus Callosum</b>          |         |       |          |                  |         |       |          |                  |         |       |          |                  |         |       |          |                  |
| IL-6 T1                         | -0.070  | 0.002 | 0.27     | 0.79             | 0.065   | 0.002 | 0.29     | 0.66             | -0.025  | 0.002 | 0.73     | 0.74             | 0.069   | 0.002 | 0.26     | 0.59             |
| Sex                             | -0.129  | 0.004 | 0.04     | 0.29             | 0.058   | 0.004 | 0.34     | 0.63             | -0.087  | 0.004 | 0.23     | 0.41             | 0.103   | 0.005 | 0.09     | 0.82             |
| NICU stay                       | 0.025   | 0.009 | 0.74     | 0.96             | -0.049  | 0.009 | 0.49     | 0.90             | 0.096   | 0.010 | 0.24     | 0.59             | -0.068  | 0.012 | 0.33     | 0.90             |
| GA at delivery                  | -0.014  | 0.002 | 0.85     | 0.85             | 0.030   | 0.001 | 0.69     | 0.89             | -0.017  | 0.002 | 0.85     | 0.95             | 0.016   | 0.002 | 0.83     | 0.83             |
| GA at T1                        | -0.047  | 0.001 | 0.46     | 0.71             | 0.073   | 0.001 | 0.23     | 0.93             | 0.040   | 0.001 | 0.58     | 0.71             | 0.069   | 0.001 | 0.25     | 0.80             |
| PMA at scan                     | 0.458   | 0.002 | <0.001   | <b>&lt;0.001</b> | -0.527  | 0.001 | <0.001   | <b>&lt;0.001</b> | -0.087  | 0.002 | 0.28     | 0.28             | -0.529  | 0.002 | <0.001   | <b>&lt;0.001</b> |
| <b>Superior Cingulum Bundle</b> |         |       |          |                  |         |       |          |                  |         |       |          |                  |         |       |          |                  |
| IL-6 T1                         | 0.022   | 0.002 | 0.74     | 0.84             | -0.004  | 0.003 | 0.95     | 0.96             | 0.041   | 0.003 | 0.55     | 0.74             | -0.024  | 0.003 | 0.70     | 0.85             |
| Sex                             | -0.103  | 0.003 | 0.13     | 0.39             | -0.037  | 0.005 | 0.56     | 0.84             | -0.126  | 0.006 | 0.06     | 0.14             | 0.005   | 0.006 | 0.94     | 0.98             |
| NICU stay                       | 0.028   | 0.008 | 0.72     | 0.96             | 0.061   | 0.012 | 0.41     | 0.90             | 0.077   | 0.014 | 0.33     | 0.59             | 0.039   | 0.014 | 0.60     | 0.90             |
| GA at delivery                  | 0.129   | 0.001 | 0.12     | 0.37             | -0.009  | 0.002 | 0.90     | 0.94             | 0.082   | 0.002 | 0.33     | 0.93             | -0.057  | 0.002 | 0.47     | 0.72             |
| GA at T1                        | -0.030  | 0.001 | 0.66     | 0.84             | -0.014  | 0.001 | 0.82     | 0.93             | -0.048  | 0.001 | 0.48     | 0.71             | -0.001  | 0.001 | 0.98     | 0.98             |
| PMA at scan                     | 0.282   | 0.001 | <0.001   | <b>&lt;0.001</b> | -0.473  | 0.002 | <0.001   | <b>&lt;0.001</b> | -0.377  | 0.002 | <0.001   | <b>&lt;0.001</b> | -0.448  | 0.002 | <0.001   | <b>&lt;0.001</b> |
| <b>Corticospinal Tract</b>      |         |       |          |                  |         |       |          |                  |         |       |          |                  |         |       |          |                  |
| IL-6 T1                         | -0.039  | 0.002 | 0.53     | 0.79             | -0.023  | 0.002 | 0.67     | 0.96             | -0.066  | 0.002 | 0.26     | 0.65             | -0.007  | 0.003 | 0.90     | 0.90             |
| Sex                             | -0.071  | 0.003 | 0.25     | 0.41             | 0.009   | 0.005 | 0.88     | 0.88             | -0.043  | 0.004 | 0.47     | 0.54             | 0.027   | 0.006 | 0.64     | 0.98             |
| NICU stay                       | 0.113   | 0.008 | 0.12     | 0.96             | 0.010   | 0.011 | 0.87     | 0.98             | 0.106   | 0.010 | 0.13     | 0.59             | -0.023  | 0.013 | 0.72     | 0.90             |
| GA at delivery                  | -0.053  | 0.001 | 0.49     | 0.55             | 0.061   | 0.002 | 0.37     | 0.84             | 0.044   | 0.002 | 0.55     | 0.93             | 0.061   | 0.002 | 0.38     | 0.72             |
| GA at T1                        | 0.019   | 0.001 | 0.76     | 0.86             | 0.023   | 0.001 | 0.67     | 0.93             | 0.063   | 0.001 | 0.29     | 0.71             | 0.008   | 0.001 | 0.89     | 0.98             |
| PMA at scan                     | 0.524   | 0.001 | <0.001   | <b>&lt;0.001</b> | -0.666  | 0.002 | <0.001   | <b>&lt;0.001</b> | -0.550  | 0.002 | <0.001   | <b>&lt;0.001</b> | -0.653  | 0.002 | <0.001   | <b>&lt;0.001</b> |
| <b>Optic Radiation</b>          |         |       |          |                  |         |       |          |                  |         |       |          |                  |         |       |          |                  |
| IL-6 T1                         | 0.002   | 0.002 | 0.98     | 0.98             | -0.089  | 0.003 | 0.14     | 0.62             | -0.093  | 0.003 | 0.17     | 0.65             | -0.071  | 0.003 | 0.22     | 0.59             |
| Sex                             | -0.080  | 0.003 | 0.18     | 0.41             | -0.066  | 0.006 | 0.27     | 0.63             | -0.166  | 0.006 | 0.02     | 0.05             | -0.028  | 0.007 | 0.63     | 0.98             |
| NICU stay                       | -0.078  | 0.008 | 0.27     | 0.96             | 0.056   | 0.014 | 0.42     | 0.90             | 0.032   | 0.014 | 0.68     | 0.77             | 0.064   | 0.015 | 0.35     | 0.90             |
| GA at delivery                  | -0.100  | 0.001 | 0.18     | 0.38             | 0.006   | 0.002 | 0.94     | 0.94             | -0.054  | 0.002 | 0.52     | 0.93             | 0.029   | 0.003 | 0.69     | 0.77             |

|                                             |        |       |        |           |        |       |        |           |        |       |        |           |        |       |        |        |
|---------------------------------------------|--------|-------|--------|-----------|--------|-------|--------|-----------|--------|-------|--------|-----------|--------|-------|--------|--------|
| GA at T1                                    | -0.010 | 0.001 | 0.87   | 0.87      | 0.015  | 0.001 | 0.81   | 0.93      | 0.038  | 0.001 | 0.58   | 0.71      | 0.018  | 0.002 | 0.76   | 0.98   |
| PMA at scan                                 | 0.559  | 0.001 | <0.001 | <0.001    | -0.545 | 0.002 | <0.001 | <0.001    | -0.271 | 0.002 | <0.001 | <0.001    | -0.592 | 0.003 | <0.001 | <0.001 |
| <b>Uncinate Fasciculus</b>                  |        |       |        |           |        |       |        |           |        |       |        |           |        |       |        |        |
| IL-6 T1                                     | -0.090 | 0.001 | 0.14   | 0.79      | -0.005 | 0.002 | 0.94   | 0.96      | -0.073 | 0.003 | 0.29   | 0.65      | 0.025  | 0.003 | 0.67   | 0.85   |
| Sex                                         | -0.114 | 0.003 | 0.06   | 0.29      | -0.074 | 0.005 | 0.23   | 0.63      | -0.166 | 0.006 | 0.02   | 0.05      | -0.025 | 0.005 | 0.67   | 0.98   |
| NICU stay                                   | 0.009  | 0.007 | 0.90   | 0.96      | 0.002  | 0.011 | 0.98   | 0.98      | -0.010 | 0.014 | 0.90   | 0.90      | 0.008  | 0.012 | 0.90   | 0.90   |
| GA at delivery                              | 0.094  | 0.001 | 0.21   | 0.38      | 0.108  | 0.002 | 0.16   | 0.71      | 0.186  | 0.002 | 0.03   | 0.27      | 0.052  | 0.002 | 0.48   | 0.72   |
| GA at T1                                    | -0.110 | 0.001 | 0.07   | 0.66      | 0.026  | 0.001 | 0.67   | 0.93      | -0.041 | 0.001 | 0.55   | 0.71      | 0.045  | 0.001 | 0.44   | 0.80   |
| PMA at scan                                 | 0.448  | 0.001 | <0.001 | <0.001    | -0.556 | 0.002 | <0.001 | <0.001    | -0.301 | 0.002 | <0.001 | <0.001    | -0.596 | 0.002 | <0.001 | <0.001 |
| <b>Inferior Fronto-Occipital Fasciculus</b> |        |       |        |           |        |       |        |           |        |       |        |           |        |       |        |        |
| IL-6 T1                                     | 0.042  | 0.002 | 0.45   | 0.79      | -0.044 | 0.003 | 0.42   | 0.76      | -0.022 | 0.002 | 0.74   | 0.74      | -0.044 | 0.003 | 0.41   | 0.74   |
| Sex                                         | -0.040 | 0.004 | 0.47   | 0.53      | -0.088 | 0.005 | 0.11   | 0.63      | -0.178 | 0.004 | 0.01   | 0.05      | -0.049 | 0.007 | 0.36   | 0.98   |
| NICU stay                                   | -0.003 | 0.008 | 0.96   | 0.96      | 0.043  | 0.012 | 0.50   | 0.90      | 0.077  | 0.010 | 0.31   | 0.59      | 0.030  | 0.015 | 0.63   | 0.90   |
| GA at delivery                              | 0.054  | 0.001 | 0.43   | 0.55      | -0.027 | 0.002 | 0.69   | 0.89      | 0.030  | 0.002 | 0.71   | 0.93      | -0.038 | 0.003 | 0.57   | 0.73   |
| GA at T1                                    | -0.058 | 0.001 | 0.30   | 0.71      | 0.028  | 0.001 | 0.62   | 0.93      | -0.013 | 0.001 | 0.84   | 0.84      | 0.046  | 0.002 | 0.39   | 0.80   |
| PMA at scan                                 | 0.603  | 0.001 | <0.001 | <0.001    | -0.634 | 0.002 | <0.001 | <0.001    | -0.401 | 0.002 | <0.001 | <0.001    | -0.644 | 0.003 | <0.001 | <0.001 |
| <b>Anterior Limb of Internal Capsule</b>    |        |       |        |           |        |       |        |           |        |       |        |           |        |       |        |        |
| IL-6 T1                                     | 0.042  | 0.001 | 0.44   | 0.79      | -0.062 | 0.003 | 0.29   | 0.96      | -0.049 | 0.003 | 0.46   | 0.74      | -0.063 | 0.004 | 0.26   | 0.59   |
| Sex                                         | -0.050 | 0.003 | 0.36   | 0.47      | -0.011 | 0.007 | 0.85   | 0.88      | -0.041 | 0.006 | 0.54   | 0.54      | 0.001  | 0.007 | 0.98   | 0.98   |
| NICU stay                                   | 0.021  | 0.007 | 0.74   | 0.96      | 0.060  | 0.015 | 0.38   | 0.90      | 0.096  | 0.013 | 0.22   | 0.59      | 0.045  | 0.017 | 0.49   | 0.90   |
| GA at delivery                              | 0.116  | 0.001 | 0.09   | 0.37      | -0.029 | 0.003 | 0.69   | 0.89      | 0.040  | 0.002 | 0.63   | 0.93      | -0.050 | 0.003 | 0.47   | 0.72   |
| GA at T1                                    | -0.039 | 0.001 | 0.48   | 0.71      | 0.044  | 0.002 | 0.46   | 0.93      | 0.032  | 0.001 | 0.63   | 0.71      | 0.044  | 0.002 | 0.43   | 0.80   |
| PMA at scan                                 | 0.584  | 0.001 | <0.001 | <0.001    | -0.554 | 0.003 | <0.001 | <0.001    | -0.376 | 0.002 | <0.001 | <0.001    | -0.586 | 0.003 | <0.001 | <0.001 |
| <b>Inferior Cingulum Bundle</b>             |        |       |        |           |        |       |        |           |        |       |        |           |        |       |        |        |
| IL-6 T1                                     | -0.048 | 0.001 | 0.46   | 0.79      | 0.003  | 0.002 | 0.96   | 0.96      | -0.023 | 0.002 | 0.74   | 0.74      | 0.019  | 0.002 | 0.75   | 0.85   |
| Sex                                         | 0.003  | 0.002 | 0.96   | 0.96      | -0.057 | 0.003 | 0.35   | 0.63      | -0.050 | 0.004 | 0.47   | 0.54      | -0.049 | 0.003 | 0.42   | 0.98   |
| NICU stay                                   | 0.067  | 0.005 | 0.38   | 0.96      | 0.006  | 0.007 | 0.93   | 0.98      | 0.045  | 0.010 | 0.57   | 0.77      | -0.016 | 0.008 | 0.82   | 0.90   |
| GA at delivery                              | -0.171 | 0.001 | 0.04   | 0.34      | 0.118  | 0.001 | 0.12   | 0.71      | -0.004 | 0.002 | 0.96   | 0.96      | 0.161  | 0.001 | 0.03   | 0.27   |
| GA at T1                                    | -0.071 | 0.001 | 0.28   | 0.71      | 0.005  | 0.001 | 0.94   | 0.94      | -0.034 | 0.001 | 0.62   | 0.71      | 0.028  | 0.001 | 0.64   | 0.96   |
| PMA at scan                                 | 0.411  | 0.001 | <0.001 | <0.001    | -0.569 | 0.001 | <0.001 | <0.001    | -0.298 | 0.002 | <0.001 | <0.001    | -0.609 | 0.001 | <0.001 | <0.001 |
| <b>Fornix</b>                               |        |       |        |           |        |       |        |           |        |       |        |           |        |       |        |        |
| IL-6 T1                                     | 0.031  | 0.001 | 0.65   | 0.84      | -0.088 | 0.002 | 0.13   | 0.62      | -0.069 | 0.002 | 0.28   | 0.65      | -0.089 | 0.002 | 0.12   | 0.59   |
| Sex0                                        | -0.075 | 0.002 | 0.27   | 0.41      | -0.020 | 0.003 | 0.72   | 0.88      | -0.045 | 0.005 | 0.48   | 0.54      | 0.002  | 0.003 | 0.97   | 0.98   |
| NICU stay                                   | 0.019  | 0.005 | 0.81   | 0.96      | 0.028  | 0.008 | 0.67   | 0.98      | 0.034  | 0.010 | 0.64   | 0.77      | 0.022  | 0.008 | 0.73   | 0.90   |
| GA at delivery                              | -0.076 | 0.001 | 0.36   | 0.54      | 0.066  | 0.001 | 0.35   | 0.84      | 0.028  | 0.002 | 0.73   | 0.93      | 0.085  | 0.001 | 0.23   | 0.72   |
| GA at T1                                    | -0.060 | 0.000 | 0.37   | 0.71      | 0.081  | 0.001 | 0.16   | 0.93      | 0.078  | 0.001 | 0.22   | 0.71      | 0.081  | 0.001 | 0.15   | 0.80   |
| PMA at scan                                 | 0.346  | 0.001 | <0.001 | <0.001    | -0.606 | 0.001 | <0.001 | <0.001    | -0.462 | 0.002 | <0.001 | <0.001    | -0.623 | 0.001 | <0.001 | <0.001 |
| <b>IL-6 Trimester 2</b>                     |        |       |        |           |        |       |        |           |        |       |        |           |        |       |        |        |
| <b>FA</b>                                   |        |       |        | <b>MD</b> |        |       |        | <b>AD</b> |        |       |        | <b>RD</b> |        |       |        |        |

|                                             | $\beta$ | SE    | $p$    | $q$              | $\beta$ | SE    | $p$    | $q$              | $\beta$ | SE    | $p$    | $q$              | $\beta$ | SE    | $p$    | $q$              |
|---------------------------------------------|---------|-------|--------|------------------|---------|-------|--------|------------------|---------|-------|--------|------------------|---------|-------|--------|------------------|
| <b>Corpus Callosum</b>                      |         |       |        |                  |         |       |        |                  |         |       |        |                  |         |       |        |                  |
| IL-6 T2                                     | -0.114  | 0.002 | 0.06   | 0.13             | 0.052   | 0.002 | 0.37   | 0.51             | -0.101  | 0.002 | 0.15   | 0.24             | 0.084   | 0.002 | 0.14   | 0.42             |
| Sex                                         | -0.065  | 0.004 | 0.28   | 0.97             | -0.035  | 0.004 | 0.54   | 0.61             | -0.099  | 0.004 | 0.16   | 0.25             | 0.017   | 0.005 | 0.77   | 0.98             |
| NICU stay                                   | -0.059  | 0.009 | 0.42   | 0.82             | -0.044  | 0.009 | 0.55   | 0.79             | 0.038   | 0.010 | 0.67   | 0.92             | -0.026  | 0.013 | 0.72   | 0.82             |
| GA at delivery                              | 0.070   | 0.001 | 0.37   | 0.67             | -0.059  | 0.001 | 0.46   | 0.85             | 0.153   | 0.001 | 0.11   | 0.43             | -0.100  | 0.002 | 0.20   | 0.63             |
| GA at T2                                    | 0.006   | 0.001 | 0.92   | 0.99             | 0.019   | 0.001 | 0.75   | 0.75             | 0.037   | 0.001 | 0.60   | 0.68             | 0.022   | 0.001 | 0.70   | 0.89             |
| PMA at scan                                 | 0.463   | 0.001 | <0.001 | <b>&lt;0.001</b> | -0.564  | 0.001 | <0.001 | <b>&lt;0.001</b> | -0.208  | 0.002 | 0.01   | <b>0.01</b>      | -0.549  | 0.002 | <0.001 | <b>&lt;0.001</b> |
| <b>Superior Cingulum Bundle</b>             |         |       |        |                  |         |       |        |                  |         |       |        |                  |         |       |        |                  |
| IL-6 T2                                     | 0.104   | 0.002 | 0.11   | 0.17             | -0.104  | 0.003 | 0.09   | 0.41             | -0.024  | 0.003 | 0.72   | 0.81             | -0.124  | 0.003 | 0.04   | 0.20             |
| Sex                                         | -0.049  | 0.003 | 0.46   | 0.97             | -0.031  | 0.005 | 0.61   | 0.61             | -0.091  | 0.006 | 0.17   | 0.25             | -0.002  | 0.006 | 0.98   | 0.98             |
| NICU stay                                   | -0.003  | 0.007 | 0.97   | 0.97             | 0.071   | 0.012 | 0.36   | 0.64             | 0.062   | 0.014 | 0.46   | 0.92             | 0.061   | 0.014 | 0.43   | 0.78             |
| GA at delivery                              | 0.022   | 0.001 | 0.81   | 0.81             | 0.117   | 0.002 | 0.16   | 0.85             | 0.131   | 0.002 | 0.14   | 0.43             | 0.090   | 0.002 | 0.28   | 0.63             |
| GA at T2                                    | -0.047  | 0.000 | 0.49   | 0.99             | 0.034   | 0.001 | 0.58   | 0.69             | 0.027   | 0.001 | 0.69   | 0.69             | 0.032   | 0.001 | 0.61   | 0.89             |
| PMA at scan                                 | 0.380   | 0.001 | <0.001 | <b>&lt;0.001</b> | -0.527  | 0.002 | <0.001 | <b>&lt;0.001</b> | -0.393  | 0.002 | <0.001 | <b>&lt;0.001</b> | -0.515  | 0.002 | <0.001 | <b>&lt;0.001</b> |
| <b>Corticospinal Tract</b>                  |         |       |        |                  |         |       |        |                  |         |       |        |                  |         |       |        |                  |
| IL-6 T2                                     | -0.193  | 0.002 | <0.01  | <b>0.01</b>      | 0.110   | 0.002 | 0.03   | 0.27             | -0.012  | 0.002 | 0.83   | 0.83             | 0.133   | 0.003 | 0.01   | 0.10             |
| Sex                                         | 0.048   | 0.003 | 0.39   | 0.97             | -0.062  | 0.005 | 0.22   | 0.49             | -0.057  | 0.004 | 0.30   | 0.34             | -0.058  | 0.006 | 0.26   | 0.60             |
| NICU stay                                   | -0.042  | 0.008 | 0.55   | 0.82             | 0.025   | 0.012 | 0.69   | 0.79             | 0.051   | 0.010 | 0.47   | 0.92             | 0.022   | 0.014 | 0.73   | 0.82             |
| GA at delivery                              | 0.040   | 0.001 | 0.59   | 0.74             | -0.025  | 0.002 | 0.72   | 0.85             | 0.034   | 0.001 | 0.65   | 0.65             | -0.015  | 0.002 | 0.82   | 0.93             |
| GA at T2                                    | 0.018   | 0.000 | 0.76   | 0.99             | 0.027   | 0.001 | 0.61   | 0.69             | 0.049   | 0.001 | 0.39   | 0.58             | 0.011   | 0.001 | 0.84   | 0.89             |
| PMA at scan                                 | 0.535   | 0.001 | <0.001 | <b>&lt;0.001</b> | -0.677  | 0.002 | <0.001 | <b>&lt;0.001</b> | -0.632  | 0.001 | <0.001 | <b>&lt;0.001</b> | -0.659  | 0.002 | <0.001 | <b>&lt;0.001</b> |
| <b>Optic Radiation</b>                      |         |       |        |                  |         |       |        |                  |         |       |        |                  |         |       |        |                  |
| IL-6 T2                                     | -0.152  | 0.002 | 0.01   | <b>0.03</b>      | 0.026   | 0.003 | 0.62   | 0.70             | -0.091  | 0.003 | 0.16   | 0.24             | 0.063   | 0.003 | 0.21   | 0.45             |
| Sex                                         | 0.000   | 0.004 | 1.00   | 1.00             | -0.147  | 0.006 | 0.01   | <b>0.03</b>      | -0.214  | 0.006 | <0.01  | <b>0.01</b>      | -0.112  | 0.006 | 0.03   | 0.12             |
| NICU stay                                   | -0.097  | 0.008 | 0.16   | 0.73             | 0.102   | 0.013 | 0.12   | 0.64             | 0.062   | 0.014 | 0.45   | 0.92             | 0.108   | 0.014 | 0.09   | 0.50             |
| GA at delivery                              | 0.033   | 0.001 | 0.65   | 0.74             | -0.075  | 0.002 | 0.29   | 0.85             | -0.044  | 0.002 | 0.62   | 0.65             | -0.073  | 0.002 | 0.28   | 0.63             |
| GA at T2                                    | 0.040   | 0.001 | 0.48   | 0.99             | 0.051   | 0.001 | 0.34   | 0.69             | 0.081   | 0.001 | 0.23   | 0.41             | 0.032   | 0.001 | 0.53   | 0.89             |
| PMA at scan                                 | 0.554   | 0.001 | <0.001 | <b>&lt;0.001</b> | -0.601  | 0.002 | <0.001 | <b>&lt;0.001</b> | -0.323  | 0.002 | <0.001 | <b>&lt;0.001</b> | -0.633  | 0.002 | <0.001 | <b>&lt;0.001</b> |
| <b>Uncinate Fasciculus</b>                  |         |       |        |                  |         |       |        |                  |         |       |        |                  |         |       |        |                  |
| IL-6 T2                                     | -0.124  | 0.001 | 0.03   | 0.09             | -0.063  | 0.002 | 0.30   | 0.51             | -0.157  | 0.003 | 0.02   | 0.19             | -0.018  | 0.003 | 0.75   | 0.75             |
| Sex                                         | -0.035  | 0.003 | 0.54   | 0.97             | -0.058  | 0.005 | 0.33   | 0.60             | -0.098  | 0.006 | 0.15   | 0.25             | -0.037  | 0.005 | 0.51   | 0.76             |
| NICU stay                                   | -0.025  | 0.007 | 0.73   | 0.89             | 0.029   | 0.011 | 0.70   | 0.79             | 0.008   | 0.013 | 0.92   | 0.96             | 0.036   | 0.012 | 0.62   | 0.82             |
| GA at delivery                              | 0.104   | 0.001 | 0.17   | 0.52             | 0.055   | 0.002 | 0.50   | 0.85             | 0.147   | 0.002 | 0.11   | 0.43             | 0.003   | 0.002 | 0.97   | 0.97             |
| GA at T2                                    | 0.002   | 0.000 | 0.97   | 0.99             | 0.074   | 0.001 | 0.23   | 0.69             | 0.089   | 0.001 | 0.20   | 0.41             | 0.053   | 0.001 | 0.36   | 0.89             |
| PMA at scan                                 | 0.524   | 0.001 | <0.001 | <b>&lt;0.001</b> | -0.549  | 0.002 | <0.001 | <b>&lt;0.001</b> | -0.246  | 0.002 | <0.001 | <b>&lt;0.001</b> | -0.605  | 0.002 | <0.001 | <b>&lt;0.001</b> |
| <b>Inferior Fronto-Occipital Fasciculus</b> |         |       |        |                  |         |       |        |                  |         |       |        |                  |         |       |        |                  |
| IL-6 T2                                     | -0.083  | 0.002 | 0.10   | 0.17             | -0.014  | 0.003 | 0.80   | 0.80             | -0.112  | 0.002 | 0.08   | 0.24             | 0.016   | 0.003 | 0.75   | 0.75             |
| Sex                                         | 0.012   | 0.004 | 0.82   | 1.00             | -0.109  | 0.006 | 0.04   | 0.12             | -0.181  | 0.004 | <0.01  | <b>0.01</b>      | -0.078  | 0.007 | 0.13   | 0.39             |

|                |        |       |        |                  |        |       |        |                  |        |       |        |                  |        |       |        |                  |
|----------------|--------|-------|--------|------------------|--------|-------|--------|------------------|--------|-------|--------|------------------|--------|-------|--------|------------------|
| NICU stay      | -0.046 | 0.008 | 0.47   | 0.82             | 0.070  | 0.013 | 0.29   | 0.64             | 0.061  | 0.010 | 0.44   | 0.92             | 0.067  | 0.016 | 0.30   | 0.67             |
| GA at delivery | 0.082  | 0.001 | 0.23   | 0.52             | -0.014 | 0.002 | 0.85   | 0.85             | 0.092  | 0.002 | 0.29   | 0.57             | -0.037 | 0.002 | 0.59   | 0.88             |
| GA at T2       | 0.037  | 0.000 | 0.47   | 0.99             | 0.027  | 0.001 | 0.61   | 0.69             | 0.106  | 0.001 | 0.11   | 0.41             | 0.007  | 0.001 | 0.89   | 0.89             |
| PMA at scan    | 0.635  | 0.001 | <0.001 | <b>&lt;0.001</b> | -0.651 | 0.002 | <0.001 | <b>&lt;0.001</b> | -0.427 | 0.002 | <0.001 | <b>&lt;0.001</b> | -0.661 | 0.002 | <0.001 | <b>&lt;0.001</b> |

**Anterior Limb of Internal Capsule**

|                |        |       |        |                  |        |       |        |                  |        |       |        |                  |        |       |        |                  |
|----------------|--------|-------|--------|------------------|--------|-------|--------|------------------|--------|-------|--------|------------------|--------|-------|--------|------------------|
| IL-6 T2        | -0.042 | 0.001 | 0.40   | 0.45             | -0.047 | 0.003 | 0.40   | 0.51             | -0.096 | 0.003 | 0.13   | 0.24             | -0.030 | 0.004 | 0.58   | 0.75             |
| Sex            | 0.003  | 0.003 | 0.95   | 1.00             | -0.045 | 0.007 | 0.42   | 0.60             | -0.059 | 0.006 | 0.36   | 0.36             | -0.037 | 0.008 | 0.49   | 0.76             |
| NICU stay      | -0.062 | 0.007 | 0.32   | 0.82             | 0.068  | 0.016 | 0.33   | 0.64             | 0.050  | 0.013 | 0.53   | 0.92             | 0.071  | 0.017 | 0.29   | 0.67             |
| GA at delivery | 0.142  | 0.001 | 0.04   | 0.30             | -0.021 | 0.002 | 0.78   | 0.85             | 0.076  | 0.002 | 0.38   | 0.57             | -0.051 | 0.003 | 0.48   | 0.87             |
| GA at T2       | -0.015 | 0.000 | 0.76   | 0.99             | 0.066  | 0.001 | 0.25   | 0.69             | 0.099  | 0.001 | 0.13   | 0.41             | 0.053  | 0.001 | 0.34   | 0.89             |
| PMA at scan    | 0.616  | 0.001 | <0.001 | <b>&lt;0.001</b> | -0.596 | 0.002 | <0.001 | <b>&lt;0.001</b> | -0.442 | 0.002 | <0.001 | <b>&lt;0.001</b> | -0.621 | 0.003 | <0.001 | <b>&lt;0.001</b> |

**Inferior Cingulum Bundle**

|                |        |       |        |                  |        |       |        |                  |        |       |        |                  |        |       |        |                  |
|----------------|--------|-------|--------|------------------|--------|-------|--------|------------------|--------|-------|--------|------------------|--------|-------|--------|------------------|
| IL-6 T2        | -0.062 | 0.001 | 0.33   | 0.43             | -0.055 | 0.001 | 0.32   | 0.51             | -0.097 | 0.002 | 0.14   | 0.24             | -0.026 | 0.002 | 0.63   | 0.75             |
| Sex            | -0.021 | 0.003 | 0.75   | 1.00             | -0.205 | 0.003 | <0.001 | <b>&lt;0.01</b>  | -0.211 | 0.004 | <0.01  | <b>0.01</b>      | -0.172 | 0.003 | <0.01  | <b>0.02</b>      |
| NICU stay      | -0.114 | 0.006 | 0.16   | 0.73             | 0.068  | 0.007 | 0.33   | 0.64             | -0.030 | 0.009 | 0.72   | 0.92             | 0.110  | 0.008 | 0.11   | 0.50             |
| GA at delivery | -0.159 | 0.001 | 0.07   | 0.30             | 0.093  | 0.001 | 0.22   | 0.85             | -0.045 | 0.001 | 0.62   | 0.65             | 0.148  | 0.001 | 0.05   | 0.41             |
| GA at T2       | 0.001  | 0.000 | 0.99   | 0.99             | 0.076  | 0.000 | 0.18   | 0.69             | 0.081  | 0.001 | 0.23   | 0.41             | 0.073  | 0.000 | 0.20   | 0.89             |
| PMA at scan    | 0.444  | 0.001 | <0.001 | <b>&lt;0.001</b> | -0.622 | 0.001 | <0.001 | <b>&lt;0.001</b> | -0.312 | 0.001 | <0.001 | <b>&lt;0.001</b> | -0.658 | 0.001 | <0.001 | <b>&lt;0.001</b> |

**Fornix**

|                |        |       |        |                  |        |       |        |                  |        |       |        |                  |        |       |        |                  |
|----------------|--------|-------|--------|------------------|--------|-------|--------|------------------|--------|-------|--------|------------------|--------|-------|--------|------------------|
| IL-6 T2        | 0.029  | 0.001 | 0.65   | 0.65             | -0.062 | 0.002 | 0.26   | 0.51             | -0.045 | 0.002 | 0.47   | 0.61             | -0.062 | 0.002 | 0.25   | 0.45             |
| Sex            | -0.090 | 0.002 | 0.17   | 0.97             | -0.040 | 0.003 | 0.47   | 0.60             | -0.078 | 0.004 | 0.21   | 0.27             | -0.009 | 0.003 | 0.88   | 0.98             |
| NICU stay      | 0.022  | 0.005 | 0.79   | 0.89             | -0.012 | 0.008 | 0.86   | 0.86             | -0.004 | 0.010 | 0.96   | 0.96             | -0.014 | 0.008 | 0.83   | 0.83             |
| GA at delivery | 0.041  | 0.001 | 0.64   | 0.74             | 0.043  | 0.001 | 0.56   | 0.85             | 0.076  | 0.002 | 0.36   | 0.57             | 0.022  | 0.001 | 0.76   | 0.93             |
| GA at T2       | -0.007 | 0.000 | 0.91   | 0.99             | -0.035 | 0.000 | 0.54   | 0.69             | -0.045 | 0.001 | 0.48   | 0.62             | -0.024 | 0.000 | 0.67   | 0.89             |
| PMA at scan    | 0.376  | 0.001 | <0.001 | <b>&lt;0.001</b> | -0.649 | 0.001 | <0.001 | <b>&lt;0.001</b> | -0.500 | 0.002 | <0.001 | <b>&lt;0.001</b> | -0.655 | 0.001 | <0.001 | <b>&lt;0.001</b> |

**IL-6 Trimester 3**

|  | FA      |    |     |     | MD      |    |     |     | AD      |    |     |     | RD      |    |     |     |
|--|---------|----|-----|-----|---------|----|-----|-----|---------|----|-----|-----|---------|----|-----|-----|
|  | $\beta$ | SE | $p$ | $q$ | $\beta$ | SE | $p$ | $q$ | $\beta$ | SE | $p$ | $q$ | $\beta$ | SE | $p$ | $q$ |

**Corpus Callosum**

|                |        |       |        |                  |        |       |        |                  |        |       |        |                  |        |       |        |                  |
|----------------|--------|-------|--------|------------------|--------|-------|--------|------------------|--------|-------|--------|------------------|--------|-------|--------|------------------|
| IL-6 T3        | -0.032 | 0.002 | 0.57   | 0.82             | -0.068 | 0.002 | 0.20   | 0.25             | -0.131 | 0.002 | 0.04   | 0.05             | -0.026 | 0.003 | 0.62   | 0.73             |
| Sex            | -0.136 | 0.003 | 0.01   | 0.12             | 0.014  | 0.003 | 0.78   | 0.95             | -0.085 | 0.004 | 0.17   | 0.30             | 0.076  | 0.005 | 0.14   | 0.41             |
| NICU stay      | -0.045 | 0.009 | 0.47   | 0.60             | -0.026 | 0.009 | 0.67   | 0.91             | 0.007  | 0.009 | 0.92   | 0.92             | -0.006 | 0.012 | 0.92   | 0.92             |
| GA at delivery | -0.006 | 0.001 | 0.93   | 0.93             | -0.001 | 0.001 | 0.99   | 0.99             | 0.065  | 0.002 | 0.42   | 0.72             | -0.018 | 0.002 | 0.79   | 0.89             |
| GA at T3       | 0.045  | 0.001 | 0.42   | 0.59             | -0.024 | 0.001 | 0.65   | 0.86             | 0.025  | 0.001 | 0.70   | 0.93             | -0.045 | 0.001 | 0.41   | 0.74             |
| PMA at scan    | 0.460  | 0.001 | <0.001 | <b>&lt;0.001</b> | -0.583 | 0.001 | <0.001 | <b>&lt;0.001</b> | -0.210 | 0.001 | <0.001 | <b>&lt;0.001</b> | -0.568 | 0.002 | <0.001 | <b>&lt;0.001</b> |

**Superior Cingulum Bundle**

|           |        |       |      |      |        |       |      |      |        |       |      |      |        |       |      |      |
|-----------|--------|-------|------|------|--------|-------|------|------|--------|-------|------|------|--------|-------|------|------|
| IL-6 T3   | 0.054  | 0.002 | 0.37 | 0.67 | -0.084 | 0.003 | 0.13 | 0.20 | -0.064 | 0.003 | 0.28 | 0.28 | -0.079 | 0.003 | 0.16 | 0.26 |
| Sex       | -0.084 | 0.003 | 0.15 | 0.45 | -0.018 | 0.005 | 0.73 | 0.95 | -0.097 | 0.005 | 0.09 | 0.25 | 0.018  | 0.005 | 0.74 | 0.94 |
| NICU stay | -0.063 | 0.008 | 0.36 | 0.60 | 0.009  | 0.012 | 0.89 | 0.91 | -0.045 | 0.014 | 0.50 | 0.71 | 0.030  | 0.014 | 0.64 | 0.92 |

|                                             |        |       |        |                  |        |       |        |                  |        |       |        |                  |        |       |        |                  |
|---------------------------------------------|--------|-------|--------|------------------|--------|-------|--------|------------------|--------|-------|--------|------------------|--------|-------|--------|------------------|
| GA at delivery                              | 0.043  | 0.001 | 0.58   | 0.87             | 0.057  | 0.002 | 0.43   | 0.99             | 0.079  | 0.002 | 0.30   | 0.72             | 0.034  | 0.002 | 0.63   | 0.82             |
| GA at T3                                    | -0.089 | 0.001 | 0.15   | 0.53             | 0.039  | 0.001 | 0.50   | 0.86             | -0.024 | 0.001 | 0.69   | 0.93             | 0.060  | 0.001 | 0.30   | 0.74             |
| PMA at scan                                 | 0.327  | 0.001 | <0.001 | <b>&lt;0.001</b> | -0.535 | 0.002 | <0.001 | <b>&lt;0.001</b> | -0.417 | 0.002 | <0.001 | <b>&lt;0.001</b> | -0.509 | 0.002 | <0.001 | <b>&lt;0.001</b> |
| <b>Corticospinal Tract</b>                  |        |       |        |                  |        |       |        |                  |        |       |        |                  |        |       |        |                  |
| IL-6 T3                                     | -0.166 | 0.002 | <0.01  | <b>0.01</b>      | 0.010  | 0.002 | 0.82   | 0.82             | -0.153 | 0.002 | <0.01  | <b>0.01</b>      | 0.064  | 0.003 | 0.18   | 0.26             |
| Sex                                         | -0.002 | 0.003 | 0.97   | 0.97             | -0.040 | 0.004 | 0.38   | 0.83             | -0.063 | 0.004 | 0.21   | 0.32             | -0.026 | 0.005 | 0.57   | 0.86             |
| NICU stay                                   | -0.071 | 0.008 | 0.22   | 0.60             | 0.028  | 0.011 | 0.59   | 0.91             | -0.035 | 0.009 | 0.56   | 0.71             | 0.037  | 0.014 | 0.48   | 0.92             |
| GA at delivery                              | -0.039 | 0.001 | 0.56   | 0.87             | -0.002 | 0.002 | 0.97   | 0.99             | -0.036 | 0.002 | 0.59   | 0.72             | 0.034  | 0.002 | 0.56   | 0.82             |
| GA at T3                                    | 0.090  | 0.001 | 0.09   | 0.53             | -0.032 | 0.001 | 0.50   | 0.86             | 0.042  | 0.001 | 0.43   | 0.93             | -0.053 | 0.001 | 0.27   | 0.74             |
| PMA at scan                                 | 0.536  | 0.001 | <0.001 | <b>&lt;0.001</b> | -0.682 | 0.002 | <0.001 | <b>&lt;0.001</b> | -0.594 | 0.001 | <0.001 | <b>&lt;0.001</b> | -0.666 | 0.002 | <0.001 | <b>&lt;0.001</b> |
| <b>Optic Radiation</b>                      |        |       |        |                  |        |       |        |                  |        |       |        |                  |        |       |        |                  |
| IL-6 T3                                     | -0.072 | 0.002 | 0.17   | 0.39             | -0.038 | 0.003 | 0.46   | 0.52             | -0.102 | 0.003 | 0.09   | 0.10             | -0.006 | 0.003 | 0.90   | 0.90             |
| Sex                                         | 0.003  | 0.003 | 0.95   | 0.97             | -0.110 | 0.005 | 0.03   | 0.14             | -0.167 | 0.005 | <0.01  | <b>0.04</b>      | -0.082 | 0.006 | 0.09   | 0.41             |
| NICU stay                                   | -0.087 | 0.009 | 0.15   | 0.60             | 0.074  | 0.013 | 0.20   | 0.90             | 0.025  | 0.013 | 0.72   | 0.81             | 0.084  | 0.015 | 0.13   | 0.60             |
| GA at delivery                              | -0.024 | 0.001 | 0.72   | 0.89             | -0.060 | 0.002 | 0.36   | 0.99             | -0.091 | 0.002 | 0.24   | 0.72             | -0.037 | 0.002 | 0.56   | 0.82             |
| GA at T3                                    | 0.028  | 0.001 | 0.61   | 0.61             | 0.038  | 0.001 | 0.47   | 0.86             | 0.087  | 0.001 | 0.16   | 0.93             | 0.017  | 0.001 | 0.73   | 0.77             |
| PMA at scan                                 | 0.539  | 0.001 | <0.001 | <b>&lt;0.001</b> | -0.572 | 0.002 | <0.001 | <b>&lt;0.001</b> | -0.288 | 0.002 | <0.001 | <b>&lt;0.001</b> | -0.609 | 0.002 | <0.001 | <b>&lt;0.001</b> |
| <b>Uncinate Fasciculus</b>                  |        |       |        |                  |        |       |        |                  |        |       |        |                  |        |       |        |                  |
| IL-6 T3                                     | -0.104 | 0.002 | 0.05   | 0.15             | -0.169 | 0.002 | <0.01  | <b>0.02</b>      | -0.258 | 0.003 | <0.001 | <b>&lt;0.001</b> | -0.105 | 0.003 | 0.04   | 0.17             |
| Sex                                         | -0.065 | 0.003 | 0.21   | 0.47             | -0.039 | 0.004 | 0.46   | 0.83             | -0.091 | 0.005 | 0.11   | 0.25             | -0.011 | 0.005 | 0.83   | 0.94             |
| NICU stay                                   | -0.047 | 0.007 | 0.44   | 0.60             | -0.136 | 0.011 | 0.03   | 0.25             | -0.183 | 0.013 | 0.01   | 0.06             | -0.090 | 0.012 | 0.13   | 0.60             |
| GA at delivery                              | 0.122  | 0.001 | 0.07   | 0.37             | 0.010  | 0.002 | 0.88   | 0.99             | 0.094  | 0.002 | 0.21   | 0.72             | -0.036 | 0.002 | 0.59   | 0.82             |
| GA at T3                                    | -0.035 | 0.000 | 0.53   | 0.59             | 0.010  | 0.001 | 0.85   | 0.96             | -0.005 | 0.001 | 0.93   | 0.93             | 0.017  | 0.001 | 0.75   | 0.77             |
| PMA at scan                                 | 0.456  | 0.001 | <0.001 | <b>&lt;0.001</b> | -0.544 | 0.002 | <0.001 | <b>&lt;0.001</b> | -0.285 | 0.002 | <0.001 | <b>&lt;0.001</b> | -0.588 | 0.002 | <0.001 | <b>&lt;0.001</b> |
| <b>Inferior Fronto-Occipital Fasciculus</b> |        |       |        |                  |        |       |        |                  |        |       |        |                  |        |       |        |                  |
| IL-6 T3                                     | -0.009 | 0.002 | 0.85   | 0.85             | -0.101 | 0.003 | 0.04   | 0.08             | -0.167 | 0.002 | <0.01  | <b>0.01</b>      | -0.071 | 0.003 | 0.13   | 0.26             |
| Sex                                         | -0.027 | 0.003 | 0.57   | 0.73             | -0.071 | 0.005 | 0.13   | 0.40             | -0.140 | 0.004 | 0.01   | 0.06             | -0.039 | 0.006 | 0.39   | 0.86             |
| NICU stay                                   | -0.047 | 0.008 | 0.40   | 0.60             | -0.011 | 0.012 | 0.84   | 0.91             | -0.051 | 0.010 | 0.43   | 0.71             | 0.008  | 0.015 | 0.88   | 0.92             |
| GA at delivery                              | 0.079  | 0.001 | 0.20   | 0.59             | -0.045 | 0.002 | 0.47   | 0.99             | 0.032  | 0.002 | 0.66   | 0.72             | -0.057 | 0.002 | 0.35   | 0.82             |
| GA at T3                                    | 0.032  | 0.001 | 0.52   | 0.59             | -0.002 | 0.001 | 0.97   | 0.97             | 0.041  | 0.001 | 0.50   | 0.93             | -0.014 | 0.001 | 0.77   | 0.77             |
| PMA at scan                                 | 0.600  | 0.001 | <0.001 | <b>&lt;0.001</b> | -0.646 | 0.002 | <0.001 | <b>&lt;0.001</b> | -0.428 | 0.002 | <0.001 | <b>&lt;0.001</b> | -0.654 | 0.002 | <0.001 | <b>&lt;0.001</b> |
| <b>Anterior Limb of Internal Capsule</b>    |        |       |        |                  |        |       |        |                  |        |       |        |                  |        |       |        |                  |
| IL-6 T3                                     | 0.018  | 0.002 | 0.71   | 0.82             | -0.111 | 0.003 | 0.03   | 0.08             | -0.152 | 0.003 | 0.01   | <b>0.01</b>      | -0.094 | 0.004 | 0.06   | 0.17             |
| Sex                                         | -0.050 | 0.003 | 0.28   | 0.50             | -0.010 | 0.006 | 0.84   | 0.95             | -0.033 | 0.005 | 0.56   | 0.56             | 0.003  | 0.007 | 0.95   | 0.95             |
| NICU stay                                   | -0.027 | 0.007 | 0.61   | 0.61             | -0.036 | 0.015 | 0.53   | 0.91             | -0.081 | 0.013 | 0.21   | 0.71             | -0.019 | 0.017 | 0.74   | 0.92             |
| GA at delivery                              | 0.107  | 0.001 | 0.08   | 0.37             | -0.034 | 0.002 | 0.60   | 0.99             | 0.044  | 0.002 | 0.55   | 0.72             | -0.054 | 0.003 | 0.39   | 0.82             |
| GA at T3                                    | 0.052  | 0.000 | 0.29   | 0.53             | -0.022 | 0.001 | 0.67   | 0.86             | 0.007  | 0.001 | 0.91   | 0.93             | -0.030 | 0.001 | 0.55   | 0.77             |
| PMA at scan                                 | 0.599  | 0.001 | <0.001 | <b>&lt;0.001</b> | -0.613 | 0.002 | <0.001 | <b>&lt;0.001</b> | -0.478 | 0.002 | <0.001 | <b>&lt;0.001</b> | -0.631 | 0.003 | <0.001 | <b>&lt;0.001</b> |

| <b>Inferior Cingulum Bundle</b> |           |       |          |                  |           |       |          |                  |           |       |          |                  |           |       |          |                  |
|---------------------------------|-----------|-------|----------|------------------|-----------|-------|----------|------------------|-----------|-------|----------|------------------|-----------|-------|----------|------------------|
| IL-6 T3                         | -0.146    | 0.001 | 0.01     | 0.06             | -0.087    | 0.002 | 0.09     | 0.17             | -0.188    | 0.002 | <0.01    | <b>0.01</b>      | -0.023    | 0.002 | 0.65     | 0.73             |
| Sex                             | 0.051     | 0.002 | 0.37     | 0.56             | -0.110    | 0.003 | 0.03     | 0.14             | -0.057    | 0.004 | 0.32     | 0.42             | -0.115    | 0.003 | 0.02     | 0.21             |
| NICU stay                       | -0.128    | 0.006 | 0.06     | 0.51             | 0.007     | 0.007 | 0.91     | 0.91             | -0.080    | 0.009 | 0.24     | 0.71             | 0.068     | 0.008 | 0.25     | 0.74             |
| GA at delivery                  | -0.085    | 0.001 | 0.26     | 0.59             | 0.111     | 0.001 | 0.10     | 0.87             | 0.042     | 0.001 | 0.59     | 0.72             | 0.132     | 0.001 | 0.05     | 0.42             |
| GA at T3                        | -0.065    | 0.000 | 0.28     | 0.53             | 0.024     | 0.001 | 0.66     | 0.86             | -0.021    | 0.001 | 0.73     | 0.93             | 0.046     | 0.001 | 0.39     | 0.74             |
| PMA at scan                     | 0.371     | 0.001 | <0.001   | <b>&lt;0.001</b> | -0.624    | 0.001 | <0.001   | <b>&lt;0.001</b> | -0.361    | 0.001 | <0.001   | <b>&lt;0.001</b> | -0.630    | 0.001 | <0.001   | <b>&lt;0.001</b> |
| <b>Fornix</b>                   |           |       |          |                  |           |       |          |                  |           |       |          |                  |           |       |          |                  |
| IL-6 T3                         | 0.021     | 0.001 | 0.73     | 0.82             | -0.135    | 0.002 | 0.01     | <b>0.03</b>      | -0.128    | 0.002 | 0.02     | <b>0.04</b>      | -0.119    | 0.002 | 0.02     | 0.16             |
| Sex                             | -0.096    | 0.002 | 0.10     | 0.44             | -0.002    | 0.003 | 0.97     | 0.97             | -0.049    | 0.004 | 0.37     | 0.42             | 0.029     | 0.003 | 0.55     | 0.86             |
| NICU stay                       | -0.041    | 0.005 | 0.54     | 0.61             | -0.025    | 0.008 | 0.66     | 0.91             | -0.052    | 0.010 | 0.42     | 0.71             | -0.007    | 0.008 | 0.91     | 0.92             |
| GA at delivery                  | 0.021     | 0.001 | 0.79     | 0.89             | 0.007     | 0.001 | 0.91     | 0.99             | 0.026     | 0.002 | 0.72     | 0.72             | 0.000     | 0.001 | 1.00     | 1.00             |
| GA at T3                        | -0.082    | 0.000 | 0.18     | 0.53             | 0.041     | 0.001 | 0.43     | 0.86             | -0.011    | 0.001 | 0.84     | 0.93             | 0.063     | 0.001 | 0.22     | 0.74             |
| PMA at scan                     | 0.351     | 0.001 | <0.001   | <b>&lt;0.001</b> | -0.635    | 0.001 | <0.001   | <b>&lt;0.001</b> | -0.487    | 0.002 | <0.001   | <b>&lt;0.001</b> | -0.642    | 0.001 | <0.001   | <b>&lt;0.001</b> |
| <b>IL-8 Trimester 1</b>         |           |       |          |                  |           |       |          |                  |           |       |          |                  |           |       |          |                  |
|                                 | <b>FA</b> |       |          |                  | <b>MD</b> |       |          |                  | <b>AD</b> |       |          |                  | <b>RD</b> |       |          |                  |
|                                 | $\beta$   | SE    | <i>p</i> | <i>q</i>         | $\beta$   | SE    | <i>p</i> | <i>q</i>         | $\beta$   | SE    | <i>p</i> | <i>q</i>         | $\beta$   | SE    | <i>p</i> | <i>q</i>         |
| <b>Corpus Callosum</b>          |           |       |          |                  |           |       |          |                  |           |       |          |                  |           |       |          |                  |
| IL-8 T1                         | -0.019    | 0.002 | 0.76     | 0.91             | 0.076     | 0.002 | 0.22     | 0.67             | 0.024     | 0.003 | 0.74     | 0.97             | 0.068     | 0.003 | 0.27     | 0.77             |
| Sex                             | -0.133    | 0.004 | 0.04     | 0.28             | 0.047     | 0.004 | 0.45     | 0.67             | -0.104    | 0.004 | 0.15     | 0.27             | 0.097     | 0.005 | 0.11     | 0.99             |
| NICU stay                       | 0.034     | 0.009 | 0.64     | 0.85             | -0.065    | 0.009 | 0.36     | 0.84             | 0.096     | 0.010 | 0.24     | 0.59             | -0.085    | 0.012 | 0.23     | 0.88             |
| GA at delivery                  | -0.008    | 0.002 | 0.92     | 0.92             | 0.023     | 0.002 | 0.77     | 0.87             | -0.005    | 0.002 | 0.95     | 0.95             | 0.007     | 0.002 | 0.93     | 0.93             |
| GA at T1                        | -0.046    | 0.001 | 0.47     | 0.70             | 0.079     | 0.001 | 0.20     | 0.82             | 0.047     | 0.001 | 0.51     | 0.68             | 0.074     | 0.001 | 0.23     | 0.59             |
| PMA at scan                     | 0.454     | 0.002 | <0.001   | <b>&lt;0.001</b> | -0.511    | 0.002 | <0.001   | <b>&lt;0.001</b> | -0.085    | 0.002 | 0.29     | 0.29             | -0.516    | 0.002 | <0.001   | <b>&lt;0.001</b> |
| <b>Superior Cingulum Bundle</b> |           |       |          |                  |           |       |          |                  |           |       |          |                  |           |       |          |                  |
| IL-8 T1                         | -0.047    | 0.002 | 0.49     | 0.91             | 0.033     | 0.003 | 0.60     | 0.78             | 0.002     | 0.004 | 0.98     | 0.98             | 0.044     | 0.004 | 0.50     | 0.77             |
| Sex                             | -0.113    | 0.003 | 0.10     | 0.28             | -0.049    | 0.005 | 0.44     | 0.67             | -0.147    | 0.006 | 0.03     | 0.07             | -0.001    | 0.006 | 0.99     | 0.99             |
| NICU stay                       | 0.030     | 0.008 | 0.70     | 0.85             | 0.056     | 0.012 | 0.45     | 0.84             | 0.069     | 0.014 | 0.38     | 0.59             | 0.036     | 0.014 | 0.63     | 0.88             |
| GA at delivery                  | 0.132     | 0.001 | 0.12     | 0.35             | -0.008    | 0.002 | 0.92     | 0.92             | 0.084     | 0.002 | 0.32     | 0.91             | -0.056    | 0.002 | 0.48     | 0.65             |
| GA at T1                        | -0.033    | 0.001 | 0.63     | 0.80             | -0.006    | 0.001 | 0.92     | 0.92             | -0.042    | 0.001 | 0.54     | 0.68             | 0.006     | 0.001 | 0.92     | 0.92             |
| PMA at scan                     | 0.275     | 0.001 | <0.001   | <b>&lt;0.001</b> | -0.471    | 0.002 | <0.001   | <b>&lt;0.001</b> | -0.382    | 0.002 | <0.001   | <b>&lt;0.001</b> | -0.445    | 0.002 | <0.001   | <b>&lt;0.001</b> |
| <b>Corticospinal Tract</b>      |           |       |          |                  |           |       |          |                  |           |       |          |                  |           |       |          |                  |
| IL-8 T1                         | -0.034    | 0.002 | 0.59     | 0.48             | 0.038     | 0.003 | 0.50     | 0.78             | 0.019     | 0.003 | 0.75     | 0.97             | 0.041     | 0.004 | 0.47     | 0.77             |
| Sex                             | -0.067    | 0.003 | 0.28     | 0.44             | -0.005    | 0.005 | 0.93     | 0.93             | -0.057    | 0.004 | 0.34     | 0.45             | 0.015     | 0.006 | 0.79     | 0.99             |
| NICU stay                       | 0.126     | 0.008 | 0.08     | 0.74             | 0.004     | 0.011 | 0.95     | 0.97             | 0.109     | 0.010 | 0.12     | 0.59             | -0.032    | 0.014 | 0.63     | 0.88             |
| GA at delivery                  | -0.040    | 0.001 | 0.61     | 0.50             | 0.059     | 0.002 | 0.39     | 0.87             | 0.057     | 0.002 | 0.45     | 0.91             | 0.055     | 0.002 | 0.44     | 0.65             |
| GA at T1                        | 0.006     | 0.001 | 0.92     | 0.57             | 0.039     | 0.001 | 0.48     | 0.82             | 0.074     | 0.001 | 0.22     | 0.68             | 0.024     | 0.001 | 0.67     | 0.76             |
| PMA at scan                     | 0.522     | 0.001 | <0.001   | <b>&lt;0.001</b> | -0.660    | 0.002 | <0.001   | <b>&lt;0.001</b> | -0.548    | 0.002 | <0.001   | <b>&lt;0.001</b> | -0.647    | 0.002 | <0.001   | <b>&lt;0.001</b> |
| <b>Optic Radiation</b>          |           |       |          |                  |           |       |          |                  |           |       |          |                  |           |       |          |                  |



|                                             |        |       |        |                  |        |       |        |                  |        |       |        |                  |        |       |        |                  |
|---------------------------------------------|--------|-------|--------|------------------|--------|-------|--------|------------------|--------|-------|--------|------------------|--------|-------|--------|------------------|
| IL-8 T1                                     | -0.007 | 0.002 | 0.91   | 0.91             | 0.023  | 0.004 | 0.71   | 0.80             | 0.021  | 0.004 | 0.76   | 0.97             | 0.020  | 0.004 | 0.74   | 0.83             |
| Sex                                         | -0.074 | 0.003 | 0.22   | 0.26             | -0.066 | 0.006 | 0.28   | 0.67             | -0.164 | 0.006 | 0.02   | 0.05             | -0.029 | 0.007 | 0.62   | 0.99             |
| NICU stay                                   | -0.071 | 0.008 | 0.31   | 0.85             | 0.068  | 0.014 | 0.34   | 0.84             | 0.051  | 0.014 | 0.52   | 0.59             | 0.071  | 0.016 | 0.30   | 0.88             |
| GA at delivery                              | -0.094 | 0.001 | 0.21   | 0.38             | 0.022  | 0.002 | 0.77   | 0.87             | -0.029 | 0.002 | 0.74   | 0.91             | 0.040  | 0.003 | 0.58   | 0.65             |
| GA at T1                                    | -0.016 | 0.001 | 0.80   | 0.90             | 0.028  | 0.001 | 0.64   | 0.82             | 0.053  | 0.001 | 0.44   | 0.68             | 0.030  | 0.002 | 0.61   | 0.76             |
| PMA at scan                                 | 0.562  | 0.001 | <0.001 | <b>&lt;0.001</b> | -0.543 | 0.002 | <0.001 | <b>&lt;0.001</b> | -0.267 | 0.002 | <0.001 | <b>&lt;0.001</b> | -0.591 | 0.003 | <0.001 | <b>&lt;0.001</b> |
| <b>Uncinate Fasciculus</b>                  |        |       |        |                  |        |       |        |                  |        |       |        |                  |        |       |        |                  |
| IL-8 T1                                     | -0.020 | 0.002 | 0.75   | 0.91             | 0.037  | 0.003 | 0.55   | 0.78             | 0.029  | 0.004 | 0.68   | 0.97             | 0.039  | 0.003 | 0.51   | 0.77             |
| Sex                                         | -0.114 | 0.003 | 0.06   | 0.28             | -0.077 | 0.005 | 0.21   | 0.67             | -0.167 | 0.006 | 0.02   | 0.05             | -0.028 | 0.005 | 0.64   | 0.99             |
| NICU stay                                   | 0.022  | 0.007 | 0.75   | 0.85             | -0.002 | 0.011 | 0.97   | 0.97             | -0.005 | 0.014 | 0.95   | 0.95             | 0.001  | 0.012 | 0.99   | 0.99             |
| GA at delivery                              | 0.105  | 0.001 | 0.17   | 0.38             | 0.109  | 0.002 | 0.16   | 0.72             | 0.192  | 0.002 | 0.03   | 0.24             | 0.049  | 0.002 | 0.50   | 0.65             |
| GA at T1                                    | -0.124 | 0.001 | 0.04   | 0.39             | 0.036  | 0.001 | 0.56   | 0.82             | -0.038 | 0.001 | 0.59   | 0.68             | 0.058  | 0.001 | 0.33   | 0.59             |
| PMA at scan                                 | 0.447  | 0.001 | <0.001 | <b>&lt;0.001</b> | -0.556 | 0.002 | <0.001 | <b>&lt;0.001</b> | -0.305 | 0.002 | <0.001 | <b>&lt;0.001</b> | -0.595 | 0.002 | <0.001 | <b>&lt;0.001</b> |
| <b>Inferior Fronto-Occipital Fasciculus</b> |        |       |        |                  |        |       |        |                  |        |       |        |                  |        |       |        |                  |
| IL-8 T1                                     | -0.032 | 0.002 | 0.57   | 0.91             | 0.073  | 0.003 | 0.19   | 0.67             | 0.091  | 0.003 | 0.17   | 0.76             | 0.060  | 0.004 | 0.27   | 0.77             |
| Sex                                         | -0.044 | 0.003 | 0.42   | 0.48             | -0.096 | 0.005 | 0.08   | 0.67             | -0.197 | 0.005 | <0.01  | <b>0.03</b>      | -0.053 | 0.007 | 0.33   | 0.99             |
| NICU stay                                   | -0.001 | 0.008 | 0.98   | 0.98             | 0.040  | 0.012 | 0.54   | 0.84             | 0.072  | 0.010 | 0.34   | 0.59             | 0.028  | 0.015 | 0.66   | 0.88             |
| GA at delivery                              | 0.056  | 0.001 | 0.42   | 0.63             | -0.027 | 0.002 | 0.69   | 0.87             | 0.031  | 0.002 | 0.71   | 0.91             | -0.039 | 0.003 | 0.57   | 0.65             |
| GA at T1                                    | -0.074 | 0.001 | 0.19   | 0.65             | 0.046  | 0.001 | 0.41   | 0.82             | 0.002  | 0.001 | 0.97   | 0.97             | 0.063  | 0.002 | 0.24   | 0.59             |
| PMA at scan                                 | 0.604  | 0.001 | <0.001 | <b>&lt;0.001</b> | -0.620 | 0.002 | <0.001 | <b>&lt;0.001</b> | -0.389 | 0.002 | <0.001 | <b>&lt;0.001</b> | -0.634 | 0.003 | <0.001 | <b>&lt;0.001</b> |
| <b>Anterior Limb of Internal Capsule</b>    |        |       |        |                  |        |       |        |                  |        |       |        |                  |        |       |        |                  |
| IL-8 T1                                     | -0.113 | 0.002 | 0.04   | 0.38             | 0.091  | 0.004 | 0.13   | 0.67             | 0.045  | 0.004 | 0.50   | 0.97             | 0.101  | 0.004 | 0.08   | 0.70             |
| Sex                                         | -0.065 | 0.003 | 0.23   | 0.37             | -0.020 | 0.007 | 0.74   | 0.83             | -0.063 | 0.006 | 0.35   | 0.45             | -0.002 | 0.007 | 0.98   | 0.99             |
| NICU stay                                   | 0.026  | 0.007 | 0.68   | 0.85             | 0.055  | 0.015 | 0.42   | 0.84             | 0.092  | 0.014 | 0.24   | 0.59             | 0.040  | 0.017 | 0.54   | 0.88             |
| GA at delivery                              | 0.126  | 0.001 | 0.07   | 0.30             | -0.035 | 0.003 | 0.63   | 0.87             | 0.037  | 0.002 | 0.66   | 0.91             | -0.058 | 0.003 | 0.41   | 0.65             |
| GA at T1                                    | -0.041 | 0.001 | 0.45   | 0.70             | 0.057  | 0.002 | 0.33   | 0.82             | 0.050  | 0.001 | 0.45   | 0.68             | 0.055  | 0.002 | 0.33   | 0.59             |
| PMA at scan                                 | 0.567  | 0.001 | <0.001 | <b>&lt;0.001</b> | -0.538 | 0.003 | <0.001 | <b>&lt;0.001</b> | -0.367 | 0.002 | <0.001 | <b>&lt;0.001</b> | -0.569 | 0.003 | <0.001 | <b>&lt;0.001</b> |
| <b>Inferior Cingulum Bundle</b>             |        |       |        |                  |        |       |        |                  |        |       |        |                  |        |       |        |                  |
| IL-8 T1                                     | 0.012  | 0.001 | 0.86   | 0.91             | 0.006  | 0.002 | 0.93   | 0.93             | 0.012  | 0.003 | 0.86   | 0.97             | 0.000  | 0.002 | 0.99   | 0.99             |
| Sex                                         | 0.010  | 0.002 | 0.89   | 0.89             | -0.057 | 0.003 | 0.36   | 0.67             | -0.044 | 0.004 | 0.53   | 0.53             | -0.051 | 0.003 | 0.39   | 0.99             |
| NICU stay                                   | 0.080  | 0.006 | 0.30   | 0.85             | 0.010  | 0.007 | 0.88   | 0.97             | 0.058  | 0.010 | 0.48   | 0.59             | -0.018 | 0.008 | 0.80   | 0.90             |
| GA at delivery                              | -0.160 | 0.001 | 0.06   | 0.30             | 0.135  | 0.001 | 0.08   | 0.72             | 0.021  | 0.002 | 0.81   | 0.91             | 0.171  | 0.001 | 0.02   | 0.21             |
| GA at T1                                    | -0.083 | 0.001 | 0.22   | 0.65             | 0.010  | 0.001 | 0.87   | 0.92             | -0.037 | 0.001 | 0.60   | 0.68             | 0.037  | 0.001 | 0.54   | 0.76             |
| PMA at scan                                 | 0.417  | 0.001 | <0.001 | <b>&lt;0.001</b> | -0.573 | 0.001 | <0.001 | <b>&lt;0.001</b> | -0.297 | 0.002 | <0.001 | <b>&lt;0.001</b> | -0.617 | 0.001 | <0.001 | <b>&lt;0.001</b> |
| <b>Fornix</b>                               |        |       |        |                  |        |       |        |                  |        |       |        |                  |        |       |        |                  |
| IL-8 T1                                     | -0.055 | 0.001 | 0.42   | 0.91             | -0.053 | 0.002 | 0.36   | 0.78             | -0.090 | 0.003 | 0.17   | 0.76             | -0.025 | 0.002 | 0.67   | 0.83             |
| Sex                                         | -0.077 | 0.002 | 0.26   | 0.37             | -0.026 | 0.003 | 0.65   | 0.83             | -0.054 | 0.005 | 0.40   | 0.45             | -0.001 | 0.003 | 0.99   | 0.99             |
| NICU stay                                   | 0.031  | 0.005 | 0.69   | 0.85             | 0.039  | 0.008 | 0.56   | 0.84             | 0.052  | 0.011 | 0.49   | 0.59             | 0.027  | 0.008 | 0.69   | 0.88             |

| GA at delivery           | -0.044  | 0.001 | 0.61   | 0.68             | 0.075   | 0.001 | 0.30   | 0.87             | 0.054   | 0.002 | 0.50   | 0.91             | 0.081   | 0.001 | 0.26   | 0.65             |
|--------------------------|---------|-------|--------|------------------|---------|-------|--------|------------------|---------|-------|--------|------------------|---------|-------|--------|------------------|
| GA at T1                 | -0.070  | 0.000 | 0.30   | 0.68             | 0.095   | 0.001 | 0.10   | 0.82             | 0.086   | 0.001 | 0.18   | 0.68             | 0.096   | 0.001 | 0.10   | 0.59             |
| PMA at scan              | 0.329   | 0.001 | <0.001 | <b>&lt;0.001</b> | -0.616  | 0.001 | <0.001 | <b>&lt;0.001</b> | -0.469  | 0.002 | <0.001 | <b>&lt;0.001</b> | -0.628  | 0.001 | <0.001 | <b>&lt;0.001</b> |
| IL-8 Trimester 2         |         |       |        |                  |         |       |        |                  |         |       |        |                  |         |       |        |                  |
|                          | FA      |       |        |                  | MD      |       |        |                  | AD      |       |        |                  | RD      |       |        |                  |
|                          | $\beta$ | SE    | $p$    | $q$              | $\beta$ | SE    | $p$    | $q$              | $\beta$ | SE    | $p$    | $q$              | $\beta$ | SE    | $p$    | $q$              |
| Corpus Callosum          |         |       |        |                  |         |       |        |                  |         |       |        |                  |         |       |        |                  |
| IL-8 T2                  | -0.091  | 0.002 | 0.12   | 0.96             | 0.024   | 0.002 | 0.68   | 0.98             | 0.013   | 0.002 | 0.86   | 0.96             | 0.052   | 0.003 | 0.36   | 0.96             |
| Sex                      | -0.080  | 0.004 | 0.19   | 0.81             | -0.037  | 0.004 | 0.52   | 0.59             | -0.105  | 0.004 | 0.14   | 0.24             | 0.021   | 0.005 | 0.72   | 0.89             |
| NICU stay                | -0.084  | 0.009 | 0.25   | 0.42             | -0.025  | 0.010 | 0.74   | 0.90             | 0.026   | 0.010 | 0.77   | 0.91             | 0.001   | 0.013 | 0.99   | 0.99             |
| GA at delivery           | 0.051   | 0.001 | 0.51   | 0.81             | -0.044  | 0.001 | 0.58   | 0.90             | 0.157   | 0.002 | 0.10   | 0.41             | -0.083  | 0.002 | 0.29   | 0.81             |
| GA at T2                 | 0.033   | 0.001 | 0.59   | 0.89             | 0.008   | 0.001 | 0.89   | 0.89             | 0.054   | 0.001 | 0.45   | 0.58             | 0.003   | 0.001 | 0.96   | 1.00             |
| PMA at scan              | 0.482   | 0.001 | <0.001 | <b>&lt;0.001</b> | -0.570  | 0.001 | <0.001 | <b>&lt;0.001</b> | -0.198  | 0.002 | 0.01   | <b>0.01</b>      | -0.564  | 0.002 | <0.001 | <b>&lt;0.001</b> |
| Superior Cingulum Bundle |         |       |        |                  |         |       |        |                  |         |       |        |                  |         |       |        |                  |
| IL-8 T2                  | 0.044   | 0.002 | 0.50   | 0.96             | 0.022   | 0.003 | 0.72   | 0.98             | 0.044   | 0.003 | 0.50   | 0.96             | 0.007   | 0.003 | 0.91   | 0.96             |
| Sex                      | -0.073  | 0.003 | 0.27   | 0.81             | -0.019  | 0.005 | 0.76   | 0.76             | -0.094  | 0.006 | 0.16   | 0.24             | 0.017   | 0.006 | 0.79   | 0.89             |
| NICU stay                | -0.007  | 0.008 | 0.93   | 1.00             | 0.071   | 0.013 | 0.36   | 0.65             | 0.061   | 0.015 | 0.47   | 0.91             | 0.062   | 0.014 | 0.42   | 0.70             |
| GA at delivery           | 0.021   | 0.001 | 0.81   | 0.81             | 0.121   | 0.002 | 0.15   | 0.90             | 0.133   | 0.002 | 0.14   | 0.41             | 0.094   | 0.002 | 0.26   | 0.81             |
| GA at T2                 | -0.046  | 0.000 | 0.49   | 0.89             | 0.046   | 0.001 | 0.47   | 0.84             | 0.036   | 0.001 | 0.59   | 0.63             | 0.043   | 0.001 | 0.50   | 1.00             |
| PMA at scan              | 0.384   | 0.001 | <0.001 | <b>&lt;0.001</b> | -0.526  | 0.002 | <0.001 | <b>&lt;0.001</b> | -0.384  | 0.002 | <0.001 | <b>&lt;0.001</b> | -0.520  | 0.002 | <0.001 | <b>&lt;0.001</b> |
| Corticospinal Tract      |         |       |        |                  |         |       |        |                  |         |       |        |                  |         |       |        |                  |
| IL-8 T2                  | -0.005  | 0.002 | 0.93   | 0.96             | 0.025   | 0.003 | 0.62   | 0.98             | 0.026   | 0.002 | 0.64   | 0.96             | 0.032   | 0.003 | 0.55   | 0.96             |
| Sex                      | 0.045   | 0.004 | 0.43   | 0.90             | -0.061  | 0.005 | 0.24   | 0.54             | -0.056  | 0.004 | 0.32   | 0.32             | -0.055  | 0.006 | 0.30   | 0.67             |
| NICU stay                | -0.078  | 0.008 | 0.28   | 0.42             | 0.051   | 0.012 | 0.43   | 0.65             | 0.060   | 0.010 | 0.39   | 0.91             | 0.047   | 0.015 | 0.47   | 0.70             |
| GA at delivery           | 0.033   | 0.001 | 0.67   | 0.81             | -0.016  | 0.002 | 0.82   | 0.90             | 0.041   | 0.001 | 0.59   | 0.75             | -0.002  | 0.002 | 0.98   | 0.98             |
| GA at T2                 | 0.052   | 0.000 | 0.38   | 0.89             | 0.008   | 0.001 | 0.88   | 0.89             | 0.052   | 0.001 | 0.36   | 0.55             | -0.014  | 0.001 | 0.79   | 1.00             |
| PMA at scan              | 0.542   | 0.001 | <0.001 | <b>&lt;0.001</b> | -0.677  | 0.002 | <0.001 | <b>&lt;0.001</b> | -0.624  | 0.002 | <0.001 | <b>&lt;0.001</b> | -0.660  | 0.002 | <0.001 | <b>&lt;0.001</b> |
| Optic Radiation          |         |       |        |                  |         |       |        |                  |         |       |        |                  |         |       |        |                  |
| IL-8 T2                  | -0.003  | 0.002 | 0.96   | 0.96             | 0.065   | 0.003 | 0.21   | 0.97             | 0.066   | 0.003 | 0.31   | 0.96             | 0.049   | 0.003 | 0.32   | 0.96             |
| Sex                      | 0.000   | 0.004 | 1.00   | 1.00             | -0.137  | 0.006 | 0.01   | <b>0.04</b>      | -0.204  | 0.006 | <0.01  | <b>0.01</b>      | -0.104  | 0.006 | 0.04   | 0.18             |
| NICU stay                | -0.123  | 0.009 | 0.08   | 0.42             | 0.127   | 0.013 | 0.05   | 0.48             | 0.075   | 0.014 | 0.36   | 0.91             | 0.134   | 0.015 | 0.03   | 0.31             |
| GA at delivery           | 0.026   | 0.001 | 0.73   | 0.81             | -0.052  | 0.002 | 0.46   | 0.90             | -0.023  | 0.002 | 0.79   | 0.79             | -0.053  | 0.002 | 0.43   | 0.81             |
| GA at T2                 | 0.065   | 0.001 | 0.25   | 0.89             | 0.043   | 0.001 | 0.42   | 0.84             | 0.095   | 0.001 | 0.15   | 0.29             | 0.018   | 0.001 | 0.73   | 1.00             |
| PMA at scan              | 0.561   | 0.001 | <0.001 | <b>&lt;0.001</b> | -0.611  | 0.002 | <0.001 | <b>&lt;0.001</b> | -0.334  | 0.002 | <0.001 | <b>&lt;0.001</b> | -0.642  | 0.002 | <0.001 | <b>&lt;0.001</b> |
| Uncinate Fasciculus      |         |       |        |                  |         |       |        |                  |         |       |        |                  |         |       |        |                  |
| IL-8 T2                  | 0.031   | 0.001 | 0.58   | 0.96             | -0.074  | 0.002 | 0.22   | 0.97             | -0.063  | 0.003 | 0.35   | 0.96             | -0.069  | 0.003 | 0.22   | 0.96             |
| Sex                      | -0.039  | 0.003 | 0.50   | 0.90             | -0.052  | 0.005 | 0.40   | 0.59             | -0.092  | 0.006 | 0.18   | 0.24             | -0.031  | 0.005 | 0.59   | 0.88             |
| NICU stay                | -0.041  | 0.007 | 0.57   | 0.73             | 0.019   | 0.012 | 0.80   | 0.90             | -0.013  | 0.014 | 0.88   | 0.91             | 0.031   | 0.012 | 0.66   | 0.85             |

|                                             |           |           |          |                  |           |           |          |                  |           |           |          |                  |           |           |          |                  |
|---------------------------------------------|-----------|-----------|----------|------------------|-----------|-----------|----------|------------------|-----------|-----------|----------|------------------|-----------|-----------|----------|------------------|
| GA at delivery                              | 0.116     | 0.001     | 0.13     | 0.40             | 0.041     | 0.002     | 0.62     | 0.90             | 0.140     | 0.002     | 0.13     | 0.41             | -0.012    | 0.002     | 0.87     | 0.98             |
| GA at T2                                    | 0.018     | 0.000     | 0.75     | 0.89             | 0.086     | 0.001     | 0.16     | 0.70             | 0.111     | 0.001     | 0.11     | 0.29             | 0.060     | 0.001     | 0.30     | 0.95             |
| PMA at scan                                 | 0.521     | 0.001     | <0.001   | <b>&lt;0.001</b> | -0.526    | 0.002     | <0.001   | <b>&lt;0.001</b> | -0.222    | 0.002     | <0.001   | <b>&lt;0.001</b> | -0.588    | 0.002     | <0.001   | <0.001           |
| <b>Inferior Fronto-Occipital Fasciculus</b> |           |           |          |                  |           |           |          |                  |           |           |          |                  |           |           |          |                  |
| IL-8 T2                                     | 0.042     | 0.002     | 0.41     | 0.96             | -0.023    | 0.003     | 0.67     | 0.98             | 0.013     | 0.002     | 0.84     | 0.96             | -0.029    | 0.003     | 0.56     | 0.96             |
| Sex                                         | 0.014     | 0.004     | 0.79     | 0.93             | -0.112    | 0.006     | 0.04     | 0.11             | -0.185    | 0.004     | <0.01    | <b>0.01</b>      | -0.080    | 0.007     | 0.12     | 0.36             |
| NICU stay                                   | -0.078    | 0.008     | 0.22     | 0.42             | 0.077     | 0.013     | 0.25     | 0.65             | 0.035     | 0.010     | 0.66     | 0.91             | 0.082     | 0.017     | 0.20     | 0.61             |
| GA at delivery                              | 0.077     | 0.001     | 0.26     | 0.59             | -0.009    | 0.002     | 0.90     | 0.90             | 0.092     | 0.002     | 0.29     | 0.59             | -0.032    | 0.002     | 0.65     | 0.97             |
| GA at T2                                    | 0.043     | 0.000     | 0.40     | 0.89             | 0.031     | 0.001     | 0.57     | 0.85             | 0.119     | 0.001     | 0.07     | 0.29             | 0.007     | 0.001     | 0.89     | 1.00             |
| PMA at scan                                 | 0.640     | 0.001     | <0.001   | <b>&lt;0.001</b> | -0.645    | 0.002     | <0.001   | <b>&lt;0.001</b> | -0.411    | 0.002     | <0.001   | <b>&lt;0.001</b> | -0.658    | 0.003     | <0.001   | <b>&lt;0.001</b> |
| <b>Anterior Limb of Internal Capsule</b>    |           |           |          |                  |           |           |          |                  |           |           |          |                  |           |           |          |                  |
| IL-8 T2                                     | 0.008     | 0.001     | 0.86     | 0.96             | -0.002    | 0.003     | 0.98     | 0.98             | 0.003     | 0.003     | 0.97     | 0.96             | -0.003    | 0.004     | 0.96     | 0.96             |
| Sex                                         | -0.011    | 0.003     | 0.83     | 0.93             | -0.045    | 0.007     | 0.43     | 0.59             | -0.071    | 0.006     | 0.28     | 0.31             | -0.034    | 0.008     | 0.53     | 0.88             |
| NICU stay                                   | -0.086    | 0.007     | 0.17     | 0.42             | 0.056     | 0.016     | 0.43     | 0.65             | 0.016     | 0.014     | 0.84     | 0.91             | 0.067     | 0.018     | 0.32     | 0.70             |
| GA at delivery                              | 0.148     | 0.001     | 0.03     | 0.26             | -0.024    | 0.002     | 0.75     | 0.90             | 0.075     | 0.002     | 0.39     | 0.59             | -0.055    | 0.003     | 0.45     | 0.81             |
| GA at T2                                    | -0.014    | 0.000     | 0.79     | 0.89             | 0.069     | 0.001     | 0.23     | 0.70             | 0.104     | 0.001     | 0.12     | 0.29             | 0.055     | 0.001     | 0.32     | 0.95             |
| PMA at scan                                 | 0.621     | 0.001     | <0.001   | <b>&lt;0.001</b> | -0.590    | 0.002     | <0.001   | <b>&lt;0.001</b> | -0.426    | 0.002     | <0.001   | <b>&lt;0.001</b> | -0.618    | 0.003     | <0.001   | <b>&lt;0.001</b> |
| <b>Inferior Cingulum Bundle</b>             |           |           |          |                  |           |           |          |                  |           |           |          |                  |           |           |          |                  |
| IL-8 T2                                     | -0.026    | 0.001     | 0.68     | 0.96             | -0.003    | 0.002     | 0.96     | 0.98             | -0.027    | 0.002     | 0.68     | 0.96             | 0.009     | 0.002     | 0.87     | 0.96             |
| Sex                                         | -0.019    | 0.003     | 0.77     | 0.93             | -0.198    | 0.003     | <0.01    | <b>0.01</b>      | -0.203    | 0.004     | <0.01    | <b>0.01</b>      | -0.166    | 0.003     | <0.01    | <b>0.03</b>      |
| NICU stay                                   | -0.131    | 0.006     | 0.11     | 0.42             | 0.080     | 0.007     | 0.26     | 0.65             | -0.030    | 0.010     | 0.72     | 0.91             | 0.126     | 0.008     | 0.07     | 0.31             |
| GA at delivery                              | -0.153    | 0.001     | 0.08     | 0.35             | 0.095     | 0.001     | 0.21     | 0.90             | -0.039    | 0.001     | 0.67     | 0.75             | 0.148     | 0.001     | 0.05     | 0.41             |
| GA at T2                                    | -0.007    | 0.000     | 0.92     | 0.92             | 0.095     | 0.000     | 0.10     | 0.70             | 0.095     | 0.001     | 0.16     | 0.29             | 0.091     | 0.000     | 0.10     | 0.93             |
| PMA at scan                                 | 0.448     | 0.001     | <0.001   | <b>&lt;0.001</b> | -0.611    | 0.001     | <0.001   | <b>&lt;0.001</b> | -0.299    | 0.002     | <0.001   | <b>&lt;0.001</b> | -0.653    | 0.001     | <0.001   | <b>&lt;0.001</b> |
| <b>Fornix</b>                               |           |           |          |                  |           |           |          |                  |           |           |          |                  |           |           |          |                  |
| IL-8 T2                                     | 0.007     | 0.001     | 0.92     | 0.96             | 0.015     | 0.002     | 0.79     | 0.98             | 0.020     | 0.002     | 0.74     | 0.96             | 0.010     | 0.002     | 0.86     | 0.96             |
| Sex                                         | -0.105    | 0.002     | 0.11     | 0.81             | -0.038    | 0.003     | 0.50     | 0.59             | -0.087    | 0.005     | 0.17     | 0.24             | 0.000     | 0.003     | 0.99     | 0.99             |
| NICU stay                                   | 0.000     | 0.005     | 1.00     | 1.00             | -0.006    | 0.008     | 0.94     | 0.94             | -0.009    | 0.011     | 0.91     | 0.91             | -0.002    | 0.008     | 0.98     | 0.99             |
| GA at delivery                              | 0.041     | 0.001     | 0.64     | 0.81             | 0.045     | 0.001     | 0.55     | 0.90             | 0.079     | 0.002     | 0.35     | 0.59             | 0.022     | 0.001     | 0.76     | 0.98             |
| GA at T2                                    | -0.023    | 0.000     | 0.73     | 0.89             | -0.013    | 0.000     | 0.82     | 0.89             | -0.031    | 0.001     | 0.63     | 0.63             | 0.000     | 0.000     | 1.00     | 1.00             |
| PMA at scan                                 | 0.373     | 0.001     | <0.001   | <b>&lt;0.001</b> | -0.640    | 0.001     | <0.001   | <b>&lt;0.001</b> | -0.483    | 0.002     | <0.001   | <b>&lt;0.001</b> | -0.649    | 0.001     | <0.001   | <b>&lt;0.001</b> |
| <b>IL-8 Trimester 3</b>                     |           |           |          |                  |           |           |          |                  |           |           |          |                  |           |           |          |                  |
|                                             | <b>FA</b> |           |          |                  | <b>MD</b> |           |          |                  | <b>AD</b> |           |          |                  | <b>RD</b> |           |          |                  |
|                                             | <b>β</b>  | <b>SE</b> | <b>p</b> | <b>q</b>         | <b>β</b>  | <b>SE</b> | <b>p</b> | <b>q</b>         | <b>β</b>  | <b>SE</b> | <b>p</b> | <b>q</b>         | <b>β</b>  | <b>SE</b> | <b>p</b> | <b>q</b>         |
| <b>Corpus Callosum</b>                      |           |           |          |                  |           |           |          |                  |           |           |          |                  |           |           |          |                  |
| IL-8 T3                                     | -0.033    | 0.002     | 0.56     | 0.63             | 0.006     | 0.002     | 0.91     | 0.92             | -0.032    | 0.002     | 0.62     | 0.92             | 0.025     | 0.002     | 0.63     | 0.82             |
| Sex                                         | -0.133    | 0.003     | 0.02     | 0.14             | -0.004    | 0.003     | 0.94     | 0.94             | -0.108    | 0.004     | 0.09     | 0.14             | 0.064     | 0.005     | 0.22     | 0.59             |
| NICU stay                                   | -0.035    | 0.009     | 0.57     | 0.64             | -0.019    | 0.010     | 0.76     | 0.98             | 0.032     | 0.010     | 0.66     | 0.87             | -0.005    | 0.013     | 0.93     | 0.93             |

|                                             |        |       |        |                  |        |       |        |                  |        |       |        |                  |        |       |        |                  |
|---------------------------------------------|--------|-------|--------|------------------|--------|-------|--------|------------------|--------|-------|--------|------------------|--------|-------|--------|------------------|
| GA at delivery                              | -0.003 | 0.001 | 0.97   | 0.99             | 0.006  | 0.001 | 0.93   | 0.93             | 0.080  | 0.002 | 0.33   | 0.58             | -0.013 | 0.002 | 0.85   | 0.99             |
| GA at T3                                    | 0.054  | 0.001 | 0.35   | 0.50             | -0.038 | 0.001 | 0.49   | 0.91             | 0.014  | 0.001 | 0.83   | 0.94             | -0.058 | 0.001 | 0.29   | 0.76             |
| PMA at scan                                 | 0.456  | 0.001 | <0.001 | <b>&lt;0.001</b> | -0.556 | 0.001 | <0.001 | <b>&lt;0.001</b> | -0.176 | 0.002 | 0.01   | <b>0.01</b>      | -0.549 | 0.002 | <0.001 | <b>&lt;0.001</b> |
| <b>Superior Cingulum Bundle</b>             |        |       |        |                  |        |       |        |                  |        |       |        |                  |        |       |        |                  |
| IL-8 T3                                     | -0.043 | 0.002 | 0.47   | 0.63             | 0.034  | 0.002 | 0.54   | 0.86             | 0.014  | 0.003 | 0.82   | 0.92             | 0.044  | 0.003 | 0.43   | 0.71             |
| Sex                                         | -0.080 | 0.003 | 0.18   | 0.40             | -0.037 | 0.005 | 0.50   | 0.74             | -0.116 | 0.005 | 0.05   | 0.10             | 0.003  | 0.005 | 0.96   | 0.96             |
| NICU stay                                   | -0.060 | 0.008 | 0.38   | 0.57             | 0.011  | 0.013 | 0.87   | 0.98             | -0.043 | 0.014 | 0.52   | 0.87             | 0.031  | 0.014 | 0.63   | 0.84             |
| GA at delivery                              | 0.001  | 0.001 | 0.99   | 0.99             | 0.091  | 0.002 | 0.21   | 0.93             | 0.089  | 0.002 | 0.24   | 0.58             | 0.075  | 0.002 | 0.31   | 0.99             |
| GA at T3                                    | -0.060 | 0.001 | 0.34   | 0.50             | 0.007  | 0.001 | 0.91   | 0.91             | -0.040 | 0.001 | 0.52   | 0.94             | 0.026  | 0.001 | 0.66   | 0.85             |
| PMA at scan                                 | 0.322  | 0.001 | <0.001 | <b>&lt;0.001</b> | -0.515 | 0.002 | <0.001 | <b>&lt;0.001</b> | -0.397 | 0.002 | <0.001 | <b>&lt;0.001</b> | -0.492 | 0.002 | <0.001 | <b>&lt;0.001</b> |
| <b>Corticospinal Tract</b>                  |        |       |        |                  |        |       |        |                  |        |       |        |                  |        |       |        |                  |
| IL-8 T3                                     | -0.081 | 0.002 | 0.12   | 0.63             | 0.071  | 0.002 | 0.13   | 0.63             | 0.030  | 0.002 | 0.58   | 0.92             | 0.077  | 0.003 | 0.11   | 0.71             |
| Sex                                         | -0.016 | 0.003 | 0.75   | 0.84             | -0.046 | 0.004 | 0.31   | 0.56             | -0.089 | 0.004 | 0.09   | 0.14             | -0.026 | 0.005 | 0.58   | 0.83             |
| NICU stay                                   | -0.060 | 0.008 | 0.32   | 0.57             | 0.032  | 0.012 | 0.55   | 0.98             | -0.017 | 0.010 | 0.78   | 0.88             | 0.035  | 0.014 | 0.51   | 0.84             |
| GA at delivery                              | -0.018 | 0.001 | 0.79   | 0.99             | 0.010  | 0.002 | 0.87   | 0.93             | 0.005  | 0.002 | 0.95   | 0.95             | 0.033  | 0.002 | 0.57   | 0.99             |
| GA at T3                                    | 0.100  | 0.001 | 0.07   | 0.50             | -0.055 | 0.001 | 0.26   | 0.91             | 0.015  | 0.001 | 0.79   | 0.94             | -0.072 | 0.001 | 0.14   | 0.76             |
| PMA at scan                                 | 0.543  | 0.001 | <0.001 | <b>&lt;0.001</b> | -0.663 | 0.002 | <0.001 | <b>&lt;0.001</b> | -0.556 | 0.002 | <0.001 | <b>&lt;0.001</b> | -0.655 | 0.002 | <0.001 | <b>&lt;0.001</b> |
| <b>Optic Radiation</b>                      |        |       |        |                  |        |       |        |                  |        |       |        |                  |        |       |        |                  |
| IL-8 T3                                     | -0.039 | 0.002 | 0.46   | 0.63             | 0.075  | 0.003 | 0.14   | 0.63             | 0.037  | 0.003 | 0.54   | 0.92             | 0.069  | 0.003 | 0.16   | 0.71             |
| Sex                                         | 0.003  | 0.003 | 0.96   | 0.96             | -0.110 | 0.005 | 0.03   | 0.13             | -0.167 | 0.005 | 0.01   | <b>0.02</b>      | -0.082 | 0.006 | 0.09   | 0.40             |
| NICU stay                                   | -0.099 | 0.009 | 0.10   | 0.57             | 0.059  | 0.014 | 0.31   | 0.98             | -0.008 | 0.014 | 0.91   | 0.91             | 0.077  | 0.016 | 0.17   | 0.84             |
| GA at delivery                              | -0.029 | 0.001 | 0.67   | 0.99             | -0.014 | 0.002 | 0.83   | 0.93             | -0.038 | 0.002 | 0.62   | 0.70             | -0.001 | 0.002 | 0.99   | 0.99             |
| GA at T3                                    | 0.037  | 0.001 | 0.51   | 0.57             | 0.008  | 0.001 | 0.88   | 0.91             | 0.054  | 0.001 | 0.39   | 0.94             | -0.008 | 0.001 | 0.88   | 0.89             |
| PMA at scan                                 | 0.544  | 0.001 | <0.001 | <b>&lt;0.001</b> | -0.573 | 0.002 | <0.001 | <b>&lt;0.001</b> | -0.286 | 0.002 | <0.001 | <b>&lt;0.001</b> | -0.611 | 0.002 | <0.001 | <b>&lt;0.001</b> |
| <b>Uncinate Fasciculus</b>                  |        |       |        |                  |        |       |        |                  |        |       |        |                  |        |       |        |                  |
| IL-8 T3                                     | 0.032  | 0.001 | 0.55   | 0.63             | -0.006 | 0.002 | 0.92   | 0.92             | 0.004  | 0.003 | 0.95   | 0.95             | -0.013 | 0.002 | 0.81   | 0.91             |
| Sex                                         | -0.077 | 0.003 | 0.14   | 0.40             | -0.064 | 0.004 | 0.24   | 0.53             | -0.127 | 0.005 | 0.03   | 0.10             | -0.028 | 0.005 | 0.59   | 0.83             |
| NICU stay                                   | -0.047 | 0.007 | 0.44   | 0.57             | -0.113 | 0.012 | 0.08   | 0.70             | -0.156 | 0.015 | 0.03   | 0.24             | -0.072 | 0.013 | 0.24   | 0.84             |
| GA at delivery                              | 0.128  | 0.001 | 0.07   | 0.59             | 0.048  | 0.002 | 0.51   | 0.93             | 0.135  | 0.002 | 0.09   | 0.58             | -0.007 | 0.002 | 0.92   | 0.99             |
| GA at T3                                    | -0.014 | 0.000 | 0.80   | 0.80             | -0.011 | 0.001 | 0.85   | 0.91             | -0.012 | 0.001 | 0.85   | 0.94             | -0.008 | 0.001 | 0.89   | 0.89             |
| PMA at scan                                 | 0.470  | 0.001 | <0.001 | <b>&lt;0.001</b> | -0.513 | 0.002 | <0.001 | <b>&lt;0.001</b> | -0.243 | 0.002 | <0.001 | <b>&lt;0.001</b> | -0.568 | 0.002 | <0.001 | <b>&lt;0.001</b> |
| <b>Inferior Fronto-Occipital Fasciculus</b> |        |       |        |                  |        |       |        |                  |        |       |        |                  |        |       |        |                  |
| IL-8 T3                                     | -0.050 | 0.002 | 0.30   | 0.63             | 0.037  | 0.002 | 0.45   | 0.86             | 0.014  | 0.002 | 0.81   | 0.92             | 0.040  | 0.003 | 0.40   | 0.71             |
| Sex                                         | -0.026 | 0.003 | 0.59   | 0.84             | -0.087 | 0.005 | 0.07   | 0.21             | -0.163 | 0.004 | <0.01  | <b>0.02</b>      | -0.052 | 0.006 | 0.26   | 0.59             |
| NICU stay                                   | -0.052 | 0.008 | 0.35   | 0.57             | -0.012 | 0.013 | 0.83   | 0.98             | -0.062 | 0.011 | 0.36   | 0.80             | 0.010  | 0.016 | 0.85   | 0.93             |
| GA at delivery                              | 0.051  | 0.001 | 0.41   | 0.93             | -0.011 | 0.002 | 0.86   | 0.93             | 0.058  | 0.002 | 0.45   | 0.58             | -0.024 | 0.003 | 0.70   | 0.99             |
| GA at T3                                    | 0.053  | 0.001 | 0.29   | 0.50             | -0.020 | 0.001 | 0.70   | 0.91             | 0.029  | 0.001 | 0.63   | 0.94             | -0.033 | 0.001 | 0.51   | 0.76             |
| PMA at scan                                 | 0.603  | 0.001 | <0.001 | <b>&lt;0.001</b> | -0.631 | 0.002 | <0.001 | <b>&lt;0.001</b> | -0.398 | 0.002 | <0.001 | <b>&lt;0.001</b> | -0.644 | 0.002 | <0.001 | <b>&lt;0.001</b> |

| <b>Anterior Limb of Internal Capsule</b> |           |       |        |                  |           |       |        |                  |           |       |        |                  |           |       |        |                  |
|------------------------------------------|-----------|-------|--------|------------------|-----------|-------|--------|------------------|-----------|-------|--------|------------------|-----------|-------|--------|------------------|
| IL-8 T3                                  | -0.051    | 0.001 | 0.28   | 0.63             | 0.025     | 0.003 | 0.62   | 0.86             | -0.028    | 0.003 | 0.63   | 0.92             | 0.036     | 0.003 | 0.47   | 0.71             |
| Sex                                      | -0.048    | 0.003 | 0.30   | 0.54             | -0.028    | 0.006 | 0.57   | 0.74             | -0.060    | 0.005 | 0.29   | 0.29             | -0.012    | 0.007 | 0.80   | 0.90             |
| NICU stay                                | -0.020    | 0.007 | 0.72   | 0.72             | -0.042    | 0.016 | 0.47   | 0.98             | -0.085    | 0.014 | 0.20   | 0.80             | -0.025    | 0.018 | 0.65   | 0.84             |
| GA at delivery                           | 0.092     | 0.001 | 0.14   | 0.62             | -0.012    | 0.002 | 0.86   | 0.93             | 0.061     | 0.002 | 0.42   | 0.58             | -0.032    | 0.003 | 0.62   | 0.99             |
| GA at T3                                 | 0.063     | 0.000 | 0.20   | 0.50             | -0.037    | 0.001 | 0.48   | 0.91             | -0.005    | 0.001 | 0.94   | 0.94             | -0.045    | 0.001 | 0.38   | 0.76             |
| PMA at scan                              | 0.595     | 0.001 | <0.001 | <b>&lt;0.001</b> | -0.592    | 0.002 | <0.001 | <b>&lt;0.001</b> | -0.450    | 0.002 | <0.001 | <b>&lt;0.001</b> | -0.614    | 0.003 | <0.001 | <b>&lt;0.001</b> |
| <b>Inferior Cingulum Bundle</b>          |           |       |        |                  |           |       |        |                  |           |       |        |                  |           |       |        |                  |
| IL-8 T3                                  | -0.068    | 0.001 | 0.25   | 0.63             | -0.022    | 0.001 | 0.67   | 0.86             | -0.070    | 0.002 | 0.24   | 0.92             | 0.004     | 0.002 | 0.93   | 0.93             |
| Sex                                      | 0.025     | 0.002 | 0.67   | 0.84             | -0.115    | 0.003 | 0.02   | 0.13             | -0.081    | 0.004 | 0.17   | 0.22             | -0.111    | 0.003 | 0.03   | 0.25             |
| NICU stay                                | -0.097    | 0.006 | 0.15   | 0.57             | -0.002    | 0.007 | 0.98   | 0.98             | -0.065    | 0.010 | 0.34   | 0.80             | 0.051     | 0.008 | 0.39   | 0.84             |
| GA at delivery                           | -0.072    | 0.001 | 0.35   | 0.93             | 0.135     | 0.001 | 0.05   | 0.43             | 0.072     | 0.002 | 0.36   | 0.58             | 0.148     | 0.001 | 0.03   | 0.24             |
| GA at T3                                 | -0.053    | 0.000 | 0.39   | 0.50             | 0.018     | 0.001 | 0.74   | 0.91             | -0.020    | 0.001 | 0.75   | 0.94             | 0.038     | 0.001 | 0.48   | 0.76             |
| PMA at scan                              | 0.390     | 0.001 | <0.001 | <b>&lt;0.001</b> | -0.626    | 0.001 | <0.001 | <b>&lt;0.001</b> | -0.348    | 0.001 | <0.001 | <b>&lt;0.001</b> | -0.641    | 0.001 | <0.001 | <b>&lt;0.001</b> |
| <b>Fornix</b>                            |           |       |        |                  |           |       |        |                  |           |       |        |                  |           |       |        |                  |
| IL-8 T3                                  | -0.013    | 0.001 | 0.83   | 0.83             | 0.041     | 0.002 | 0.42   | 0.86             | 0.024     | 0.002 | 0.67   | 0.92             | 0.046     | 0.002 | 0.36   | 0.71             |
| Sex                                      | -0.106    | 0.002 | 0.07   | 0.31             | -0.013    | 0.003 | 0.79   | 0.89             | -0.067    | 0.004 | 0.23   | 0.26             | 0.023     | 0.003 | 0.64   | 0.83             |
| NICU stay                                | -0.071    | 0.005 | 0.29   | 0.57             | 0.011     | 0.008 | 0.85   | 0.98             | -0.027    | 0.011 | 0.68   | 0.87             | 0.032     | 0.008 | 0.58   | 0.84             |
| GA at delivery                           | 0.007     | 0.001 | 0.93   | 0.99             | 0.048     | 0.001 | 0.47   | 0.93             | 0.059     | 0.002 | 0.43   | 0.58             | 0.039     | 0.001 | 0.55   | 0.99             |
| GA at T3                                 | -0.089    | 0.000 | 0.15   | 0.50             | 0.045     | 0.001 | 0.40   | 0.91             | -0.011    | 0.001 | 0.85   | 0.94             | 0.068     | 0.001 | 0.19   | 0.76             |
| PMA at scan                              | 0.357     | 0.001 | <0.001 | <b>&lt;0.001</b> | -0.626    | 0.001 | <0.001 | <b>&lt;0.001</b> | -0.473    | 0.002 | <0.001 | <b>&lt;0.001</b> | -0.637    | 0.001 | <0.001 | <b>&lt;0.001</b> |
| <b>IL-10 Trimester 1</b>                 |           |       |        |                  |           |       |        |                  |           |       |        |                  |           |       |        |                  |
|                                          | <b>FA</b> |       |        |                  | <b>MD</b> |       |        |                  | <b>AD</b> |       |        |                  | <b>RD</b> |       |        |                  |
|                                          | $\beta$   | SE    | $p$    | $q$              | $\beta$   | SE    | $p$    | $q$              | $\beta$   | SE    | $p$    | $q$              | $\beta$   | SE    | $p$    | $q$              |
| <b>Corpus Callosum</b>                   |           |       |        |                  |           |       |        |                  |           |       |        |                  |           |       |        |                  |
| IL-10 T1                                 | 0.017     | 0.002 | 0.78   | 0.83             | 0.012     | 0.002 | 0.85   | 1.00             | 0.064     | 0.002 | 0.37   | 0.69             | -0.009    | 0.003 | 0.88   | 0.88             |
| Sex                                      | -0.126    | 0.004 | 0.05   | 0.25             | 0.066     | 0.004 | 0.28   | 0.68             | -0.072    | 0.004 | 0.32   | 0.58             | 0.107     | 0.005 | 0.08   | 0.72             |
| NICU stay                                | 0.043     | 0.009 | 0.56   | 0.90             | -0.056    | 0.009 | 0.43   | 0.86             | 0.112     | 0.010 | 0.17   | 0.58             | -0.081    | 0.012 | 0.25   | 0.85             |
| GA at delivery                           | -0.005    | 0.002 | 0.95   | 0.95             | 0.036     | 0.002 | 0.64   | 0.89             | 0.006     | 0.002 | 0.95   | 0.95             | 0.015     | 0.002 | 0.84   | 0.84             |
| GA at T1                                 | -0.038    | 0.001 | 0.55   | 0.86             | 0.063     | 0.001 | 0.31   | 0.94             | 0.037     | 0.001 | 0.61   | 0.32             | 0.060     | 0.001 | 0.32   | 0.84             |
| PMA at scan                              | 0.468     | 0.002 | <0.001 | <b>&lt;0.001</b> | -0.527    | 0.002 | <0.001 | <b>&lt;0.001</b> | -0.075    | 0.002 | 0.35   | 0.35             | -0.534    | 0.002 | <0.001 | <b>&lt;0.001</b> |
| <b>Superior Cingulum Bundle</b>          |           |       |        |                  |           |       |        |                  |           |       |        |                  |           |       |        |                  |
| IL-10 T1                                 | -0.021    | 0.002 | 0.75   | 0.83             | 0.026     | 0.003 | 0.68   | 1.00             | 0.019     | 0.003 | 0.78   | 0.69             | 0.029     | 0.003 | 0.65   | 0.84             |
| Sex                                      | -0.112    | 0.003 | 0.10   | 0.30             | -0.035    | 0.005 | 0.59   | 0.88             | -0.128    | 0.006 | 0.06   | 0.13             | 0.010     | 0.006 | 0.88   | 0.89             |
| NICU stay                                | 0.032     | 0.008 | 0.68   | 0.90             | 0.058     | 0.012 | 0.43   | 0.86             | 0.071     | 0.014 | 0.37   | 0.61             | 0.038     | 0.014 | 0.61   | 0.85             |
| GA at delivery                           | 0.135     | 0.001 | 0.11   | 0.32             | -0.009    | 0.002 | 0.91   | 0.91             | 0.083     | 0.002 | 0.32   | 0.88             | -0.058    | 0.002 | 0.46   | 0.72             |
| GA at T1                                 | -0.026    | 0.001 | 0.70   | 0.87             | -0.013    | 0.001 | 0.84   | 0.94             | -0.045    | 0.001 | 0.50   | 0.93             | -0.001    | 0.001 | 0.99   | 0.99             |
| PMA at scan                              | 0.285     | 0.001 | <0.001 | <b>&lt;0.001</b> | -0.475    | 0.002 | <0.001 | <b>&lt;0.001</b> | -0.373    | 0.002 | <0.001 | <b>&lt;0.001</b> | -0.452    | 0.002 | <0.001 | <b>&lt;0.001</b> |
| <b>Corticospinal Tract</b>               |           |       |        |                  |           |       |        |                  |           |       |        |                  |           |       |        |                  |

|                                             |        |       |        |                  |        |       |        |                  |        |       |        |                  |        |       |        |                  |
|---------------------------------------------|--------|-------|--------|------------------|--------|-------|--------|------------------|--------|-------|--------|------------------|--------|-------|--------|------------------|
| IL-10 T1                                    | -0.013 | 0.002 | 0.83   | 0.83             | 0.079  | 0.003 | 0.15   | 0.68             | 0.107  | 0.002 | 0.07   | 0.67             | 0.063  | 0.003 | 0.26   | 0.79             |
| Sex                                         | -0.073 | 0.003 | 0.24   | 0.36             | 0.013  | 0.005 | 0.82   | 0.94             | -0.036 | 0.004 | 0.54   | 0.59             | 0.030  | 0.006 | 0.60   | 0.89             |
| NICU stay                                   | 0.126  | 0.008 | 0.08   | 0.73             | 0.010  | 0.011 | 0.88   | 0.99             | 0.116  | 0.010 | 0.09   | 0.58             | -0.027 | 0.013 | 0.67   | 0.85             |
| GA at delivery                              | -0.042 | 0.001 | 0.58   | 0.65             | 0.062  | 0.002 | 0.36   | 0.81             | 0.057  | 0.002 | 0.44   | 0.88             | 0.058  | 0.002 | 0.40   | 0.72             |
| GA at T1                                    | 0.018  | 0.001 | 0.77   | 0.87             | 0.026  | 0.001 | 0.64   | 0.94             | 0.064  | 0.001 | 0.29   | 0.76             | 0.011  | 0.001 | 0.84   | 0.95             |
| PMA at scan                                 | 0.527  | 0.001 | <0.001 | <b>&lt;0.001</b> | -0.662 | 0.002 | <0.001 | <b>&lt;0.001</b> | -0.539 | 0.002 | <0.001 | <b>&lt;0.001</b> | -0.651 | 0.002 | <0.001 | <b>&lt;0.001</b> |
| <b>Optic Radiation</b>                      |        |       |        |                  |        |       |        |                  |        |       |        |                  |        |       |        |                  |
| IL-10 T1                                    | -0.017 | 0.002 | 0.77   | 0.83             | 0.053  | 0.003 | 0.38   | 0.93             | 0.058  | 0.003 | 0.40   | 0.69             | 0.048  | 0.004 | 0.41   | 0.79             |
| Sex                                         | -0.085 | 0.003 | 0.16   | 0.36             | -0.055 | 0.006 | 0.37   | 0.68             | -0.154 | 0.006 | 0.03   | 0.08             | -0.018 | 0.007 | 0.76   | 0.89             |
| NICU stay                                   | -0.071 | 0.008 | 0.31   | 0.90             | 0.067  | 0.014 | 0.34   | 0.86             | 0.049  | 0.014 | 0.54   | 0.61             | 0.070  | 0.015 | 0.30   | 0.85             |
| GA at delivery                              | -0.098 | 0.001 | 0.19   | 0.35             | 0.020  | 0.002 | 0.79   | 0.89             | -0.034 | 0.002 | 0.69   | 0.88             | 0.040  | 0.003 | 0.58   | 0.72             |
| GA at T1                                    | -0.006 | 0.001 | 0.92   | 0.92             | 0.013  | 0.001 | 0.83   | 0.94             | 0.039  | 0.001 | 0.58   | 0.76             | 0.015  | 0.002 | 0.79   | 0.95             |
| PMA at scan                                 | 0.564  | 0.001 | <0.001 | <b>&lt;0.001</b> | -0.545 | 0.002 | <0.001 | <b>&lt;0.001</b> | -0.265 | 0.002 | <0.001 | <b>&lt;0.001</b> | -0.594 | 0.003 | <0.001 | <b>&lt;0.001</b> |
| <b>Uncinate Fasciculus</b>                  |        |       |        |                  |        |       |        |                  |        |       |        |                  |        |       |        |                  |
| IL-10 T1                                    | 0.041  | 0.002 | 0.50   | 0.83             | -0.045 | 0.003 | 0.46   | 0.93             | -0.026 | 0.003 | 0.71   | 0.78             | -0.051 | 0.003 | 0.38   | 0.79             |
| Sex                                         | -0.119 | 0.003 | 0.06   | 0.25             | -0.078 | 0.005 | 0.21   | 0.68             | -0.171 | 0.006 | 0.01   | 0.06             | -0.027 | 0.005 | 0.65   | 0.89             |
| NICU stay                                   | 0.018  | 0.007 | 0.80   | 0.90             | 0.001  | 0.011 | 0.99   | 0.99             | -0.004 | 0.014 | 0.96   | 0.96             | 0.005  | 0.012 | 0.94   | 0.94             |
| GA at delivery                              | 0.099  | 0.001 | 0.19   | 0.35             | 0.110  | 0.002 | 0.15   | 0.68             | 0.190  | 0.002 | 0.03   | 0.24             | 0.052  | 0.002 | 0.47   | 0.72             |
| GA at T1                                    | -0.098 | 0.001 | 0.11   | 0.84             | 0.029  | 0.001 | 0.64   | 0.94             | -0.029 | 0.001 | 0.68   | 0.76             | 0.043  | 0.001 | 0.47   | 0.84             |
| PMA at scan                                 | 0.445  | 0.001 | <0.001 | <b>&lt;0.001</b> | -0.556 | 0.002 | <0.001 | <b>&lt;0.001</b> | -0.305 | 0.002 | <0.001 | <b>&lt;0.001</b> | -0.596 | 0.002 | <0.001 | <b>&lt;0.001</b> |
| <b>Inferior Fronto-Occipital Fasciculus</b> |        |       |        |                  |        |       |        |                  |        |       |        |                  |        |       |        |                  |
| IL-10 T1                                    | -0.018 | 0.002 | 0.74   | 0.83             | 0.036  | 0.003 | 0.52   | 0.93             | 0.048  | 0.002 | 0.46   | 0.69             | 0.032  | 0.004 | 0.55   | 0.82             |
| Sex                                         | -0.051 | 0.003 | 0.35   | 0.40             | -0.079 | 0.005 | 0.15   | 0.68             | -0.171 | 0.005 | 0.01   | 0.06             | -0.040 | 0.007 | 0.46   | 0.89             |
| NICU stay                                   | 0.001  | 0.008 | 0.99   | 0.99             | 0.045  | 0.012 | 0.48   | 0.86             | 0.085  | 0.010 | 0.27   | 0.60             | 0.030  | 0.015 | 0.63   | 0.85             |
| GA at delivery                              | 0.050  | 0.001 | 0.46   | 0.65             | -0.019 | 0.002 | 0.78   | 0.89             | 0.039  | 0.002 | 0.63   | 0.88             | -0.031 | 0.003 | 0.64   | 0.72             |
| GA at T1                                    | -0.051 | 0.001 | 0.35   | 0.84             | 0.025  | 0.001 | 0.65   | 0.94             | -0.011 | 0.001 | 0.87   | 0.87             | 0.042  | 0.002 | 0.44   | 0.84             |
| PMA at scan                                 | 0.618  | 0.001 | <0.001 | <b>&lt;0.001</b> | -0.636 | 0.002 | <0.001 | <b>&lt;0.001</b> | -0.396 | 0.002 | <0.001 | <b>&lt;0.001</b> | -0.650 | 0.003 | <0.001 | <b>&lt;0.001</b> |
| <b>Anterior Limb of Internal Capsule</b>    |        |       |        |                  |        |       |        |                  |        |       |        |                  |        |       |        |                  |
| IL-10 T1                                    | -0.030 | 0.002 | 0.59   | 0.83             | 0.000  | 0.004 | 1.00   | 1.00             | -0.026 | 0.003 | 0.70   | 0.78             | 0.009  | 0.004 | 0.88   | 0.88             |
| Sex                                         | -0.069 | 0.003 | 0.21   | 0.36             | -0.003 | 0.007 | 0.96   | 0.96             | -0.041 | 0.006 | 0.54   | 0.59             | 0.012  | 0.007 | 0.83   | 0.89             |
| NICU stay                                   | 0.017  | 0.007 | 0.79   | 0.90             | 0.067  | 0.015 | 0.33   | 0.86             | 0.101  | 0.014 | 0.19   | 0.58             | 0.051  | 0.017 | 0.43   | 0.85             |
| GA at delivery                              | 0.114  | 0.001 | 0.10   | 0.32             | -0.019 | 0.003 | 0.79   | 0.89             | 0.052  | 0.002 | 0.53   | 0.88             | -0.042 | 0.003 | 0.55   | 0.72             |
| GA at T1                                    | -0.031 | 0.001 | 0.58   | 0.84             | 0.046  | 0.002 | 0.43   | 0.94             | 0.041  | 0.001 | 0.54   | 0.76             | 0.045  | 0.002 | 0.43   | 0.84             |
| PMA at scan                                 | 0.585  | 0.001 | <0.001 | <b>&lt;0.001</b> | -0.556 | 0.003 | <0.001 | <b>&lt;0.001</b> | -0.375 | 0.002 | <0.001 | <b>&lt;0.001</b> | -0.589 | 0.003 | <0.001 | <b>&lt;0.001</b> |
| <b>Inferior Cingulum Bundle</b>             |        |       |        |                  |        |       |        |                  |        |       |        |                  |        |       |        |                  |
| IL-10 T1                                    | -0.040 | 0.001 | 0.54   | 0.83             | 0.093  | 0.002 | 0.13   | 0.68             | 0.073  | 0.002 | 0.29   | 0.69             | 0.087  | 0.002 | 0.14   | 0.79             |
| Sex                                         | 0.007  | 0.002 | 0.91   | 0.91             | -0.055 | 0.003 | 0.38   | 0.68             | -0.043 | 0.004 | 0.53   | 0.59             | -0.048 | 0.003 | 0.42   | 0.89             |
| NICU stay                                   | 0.078  | 0.006 | 0.31   | 0.90             | 0.005  | 0.007 | 0.94   | 0.99             | 0.051  | 0.010 | 0.52   | 0.61             | -0.022 | 0.008 | 0.75   | 0.85             |

|                                 |           |           |          |                  |           |           |          |                  |           |           |          |                  |           |           |          |                  |
|---------------------------------|-----------|-----------|----------|------------------|-----------|-----------|----------|------------------|-----------|-----------|----------|------------------|-----------|-----------|----------|------------------|
| GA at delivery                  | -0.154    | 0.001     | 0.06     | 0.32             | 0.120     | 0.001     | 0.12     | 0.68             | 0.008     | 0.002     | 0.93     | 0.95             | 0.157     | 0.001     | 0.03     | 0.31             |
| GA at T1                        | -0.071    | 0.001     | 0.29     | 0.84             | -0.004    | 0.001     | 0.94     | 0.94             | -0.044    | 0.001     | 0.53     | 0.76             | 0.021     | 0.001     | 0.73     | 0.95             |
| PMA at scan                     | 0.407     | 0.001     | <0.001   | <b>&lt;0.001</b> | -0.564    | 0.001     | <0.001   | <b>&lt;0.001</b> | -0.291    | 0.002     | <0.001   | <b>&lt;0.001</b> | -0.606    | 0.001     | <0.001   | <b>&lt;0.001</b> |
| <b>Fornix</b>                   |           |           |          |                  |           |           |          |                  |           |           |          |                  |           |           |          |                  |
| IL-10 T1                        | 0.116     | 0.001     | 0.09     | 0.77             | -0.007    | 0.002     | 0.90     | 1.00             | 0.059     | 0.003     | 0.36     | 0.69             | -0.044    | 0.002     | 0.44     | 0.79             |
| Sex                             | -0.067    | 0.002     | 0.33     | 0.40             | -0.012    | 0.003     | 0.83     | 0.94             | -0.034    | 0.005     | 0.59     | 0.59             | 0.008     | 0.003     | 0.89     | 0.89             |
| NICU stay                       | 0.033     | 0.005     | 0.67     | 0.90             | 0.032     | 0.008     | 0.63     | 0.95             | 0.045     | 0.011     | 0.55     | 0.61             | 0.021     | 0.008     | 0.75     | 0.85             |
| GA at delivery                  | -0.054    | 0.001     | 0.52     | 0.65             | 0.071     | 0.001     | 0.32     | 0.81             | 0.045     | 0.002     | 0.57     | 0.88             | 0.081     | 0.001     | 0.25     | 0.72             |
| GA at T1                        | -0.060    | 0.000     | 0.38     | 0.84             | 0.086     | 0.001     | 0.14     | 0.94             | 0.082     | 0.001     | 0.20     | 0.76             | 0.085     | 0.001     | 0.14     | 0.84             |
| PMA at scan                     | 0.349     | 0.001     | <0.001   | <b>&lt;0.001</b> | -0.612    | 0.001     | <0.001   | <b>&lt;0.001</b> | -0.456    | 0.002     | <0.001   | <b>&lt;0.001</b> | -0.631    | 0.001     | <0.001   | <b>&lt;0.001</b> |
| <b>IL-10 Trimester 2</b>        |           |           |          |                  |           |           |          |                  |           |           |          |                  |           |           |          |                  |
|                                 | <b>FA</b> |           |          |                  | <b>MD</b> |           |          |                  | <b>AD</b> |           |          |                  | <b>RD</b> |           |          |                  |
|                                 | <b>β</b>  | <b>SE</b> | <b>p</b> | <b>q</b>         | <b>β</b>  | <b>SE</b> | <b>p</b> | <b>q</b>         | <b>β</b>  | <b>SE</b> | <b>p</b> | <b>q</b>         | <b>β</b>  | <b>SE</b> | <b>p</b> | <b>q</b>         |
| <b>Corpus Callosum</b>          |           |           |          |                  |           |           |          |                  |           |           |          |                  |           |           |          |                  |
| IL-10 T2                        | -0.143    | 0.002     | 0.02     | <b>0.04</b>      | 0.136     | 0.002     | 0.02     | 0.06             | -0.033    | 0.002     | 0.64     | 0.77             | 0.158     | 0.003     | <0.01    | <b>0.01</b>      |
| Sex                             | -0.075    | 0.004     | 0.21     | 0.88             | -0.024    | 0.004     | 0.67     | 0.67             | -0.105    | 0.004     | 0.14     | 0.19             | 0.026     | 0.005     | 0.65     | 0.72             |
| NICU stay                       | -0.047    | 0.009     | 0.52     | 0.89             | -0.060    | 0.009     | 0.41     | 0.81             | 0.023     | 0.010     | 0.79     | 0.88             | -0.049    | 0.012     | 0.49     | 0.75             |
| GA at delivery                  | 0.093     | 0.001     | 0.23     | 0.42             | -0.072    | 0.001     | 0.36     | 0.76             | 0.155     | 0.001     | 0.11     | 0.49             | -0.127    | 0.002     | 0.10     | 0.45             |
| GA at T2                        | 0.043     | 0.001     | 0.48     | 0.79             | 0.003     | 0.001     | 0.96     | 0.96             | 0.032     | 0.001     | 0.66     | 0.74             | -0.017    | 0.001     | 0.77     | 0.99             |
| PMA at scan                     | 0.473     | 0.001     | <0.001   | <b>&lt;0.001</b> | -0.573    | 0.001     | <0.001   | <b>&lt;0.001</b> | -0.185    | 0.002     | 0.02     | <b>0.02</b>      | -0.557    | 0.002     | <0.001   | <b>&lt;0.001</b> |
| <b>Superior Cingulum Bundle</b> |           |           |          |                  |           |           |          |                  |           |           |          |                  |           |           |          |                  |
| IL-10 T2                        | 0.011     | 0.002     | 0.86     | 0.86             | 0.023     | 0.003     | 0.71     | 0.80             | 0.042     | 0.003     | 0.52     | 0.77             | 0.010     | 0.003     | 0.87     | 0.87             |
| Sex                             | -0.028    | 0.003     | 0.68     | 0.88             | -0.058    | 0.005     | 0.36     | 0.40             | -0.110    | 0.006     | 0.10     | 0.18             | -0.027    | 0.006     | 0.66     | 0.72             |
| NICU stay                       | 0.012     | 0.007     | 0.89     | 0.89             | 0.056     | 0.012     | 0.48     | 0.81             | 0.052     | 0.014     | 0.54     | 0.88             | 0.045     | 0.014     | 0.57     | 0.75             |
| GA at delivery                  | 0.019     | 0.001     | 0.83     | 0.83             | 0.119     | 0.002     | 0.16     | 0.76             | 0.126     | 0.002     | 0.16     | 0.49             | 0.093     | 0.002     | 0.27     | 0.60             |
| GA at T2                        | -0.042    | 0.000     | 0.53     | 0.79             | 0.055     | 0.001     | 0.39     | 0.75             | 0.041     | 0.001     | 0.54     | 0.70             | 0.050     | 0.001     | 0.44     | 0.98             |
| PMA at scan                     | 0.373     | 0.001     | <0.001   | <b>&lt;0.001</b> | -0.522    | 0.002     | <0.001   | <b>&lt;0.001</b> | -0.379    | 0.002     | <0.001   | <b>&lt;0.001</b> | -0.513    | 0.002     | <0.001   | <b>&lt;0.001</b> |
| <b>Corticospinal Tract</b>      |           |           |          |                  |           |           |          |                  |           |           |          |                  |           |           |          |                  |
| IL-10 T2                        | -0.231    | 0.002     | <0.001   | <b>&lt;0.001</b> | 0.175     | 0.003     | <0.01    | <b>&lt;0.01</b>  | 0.047     | 0.002     | 0.40     | 0.77             | 0.197     | 0.003     | <0.001   | <b>&lt;0.01</b>  |
| Sex                             | 0.058     | 0.003     | 0.30     | 0.88             | -0.076    | 0.005     | 0.13     | 0.30             | -0.071    | 0.004     | 0.21     | 0.24             | -0.072    | 0.006     | 0.17     | 0.37             |
| NICU stay                       | -0.031    | 0.008     | 0.66     | 0.89             | 0.007     | 0.012     | 0.92     | 0.92             | 0.039     | 0.010     | 0.59     | 0.88             | 0.004     | 0.014     | 0.95     | 0.95             |
| GA at delivery                  | 0.066     | 0.001     | 0.38     | 0.57             | -0.046    | 0.002     | 0.51     | 0.76             | 0.029     | 0.001     | 0.70     | 0.70             | -0.038    | 0.002     | 0.58     | 0.74             |
| GA at T2                        | 0.050     | 0.000     | 0.38     | 0.79             | 0.013     | 0.001     | 0.81     | 0.91             | 0.049     | 0.001     | 0.39     | 0.59             | -0.007    | 0.001     | 0.89     | 0.99             |
| PMA at scan                     | 0.540     | 0.001     | <0.001   | <b>&lt;0.001</b> | -0.673    | 0.002     | <0.001   | <b>&lt;0.001</b> | -0.618    | 0.002     | <0.001   | <b>&lt;0.001</b> | -0.657    | 0.002     | <0.001   | <b>&lt;0.001</b> |
| <b>Optic Radiation</b>          |           |           |          |                  |           |           |          |                  |           |           |          |                  |           |           |          |                  |
| IL-10 T2                        | -0.123    | 0.002     | 0.02     | <b>0.04</b>      | 0.115     | 0.003     | 0.03     | 0.06             | 0.055     | 0.003     | 0.39     | 0.77             | 0.125     | 0.003     | 0.01     | <b>0.03</b>      |
| Sex                             | 0.008     | 0.004     | 0.88     | 0.91             | -0.163    | 0.006     | <0.01    | <b>0.01</b>      | -0.231    | 0.006     | <0.001   | <b>&lt;0.01</b>  | -0.127    | 0.006     | 0.01     | 0.06             |
| NICU stay                       | -0.090    | 0.008     | 0.20     | 0.89             | 0.087     | 0.013     | 0.19     | 0.81             | 0.051     | 0.014     | 0.54     | 0.88             | 0.094     | 0.014     | 0.14     | 0.75             |

|                                             |        |       |        |                  |        |       |        |                  |        |       |        |                  |        |       |        |                  |
|---------------------------------------------|--------|-------|--------|------------------|--------|-------|--------|------------------|--------|-------|--------|------------------|--------|-------|--------|------------------|
| GA at delivery                              | 0.053  | 0.001 | 0.48   | 0.62             | -0.085 | 0.002 | 0.23   | 0.76             | -0.041 | 0.002 | 0.64   | 0.70             | -0.087 | 0.002 | 0.20   | 0.60             |
| GA at T2                                    | 0.074  | 0.000 | 0.19   | 0.79             | 0.043  | 0.001 | 0.42   | 0.75             | 0.103  | 0.001 | 0.12   | 0.37             | 0.014  | 0.001 | 0.78   | 0.99             |
| PMA at scan                                 | 0.558  | 0.001 | <0.001 | <b>&lt;0.001</b> | -0.597 | 0.002 | <0.001 | <b>&lt;0.001</b> | -0.325 | 0.002 | <0.001 | <b>&lt;0.001</b> | -0.631 | 0.002 | <0.001 | <b>&lt;0.001</b> |
| <b>Uncinate Fasciculus</b>                  |        |       |        |                  |        |       |        |                  |        |       |        |                  |        |       |        |                  |
| IL-10 T2                                    | -0.089 | 0.002 | 0.11   | 0.13             | -0.044 | 0.003 | 0.47   | 0.67             | -0.110 | 0.003 | 0.11   | 0.48             | -0.015 | 0.003 | 0.79   | 0.87             |
| Sex                                         | -0.023 | 0.003 | 0.69   | 0.88             | -0.067 | 0.005 | 0.27   | 0.35             | -0.100 | 0.006 | 0.15   | 0.19             | -0.048 | 0.005 | 0.41   | 0.61             |
| NICU stay                                   | -0.025 | 0.007 | 0.73   | 0.89             | 0.034  | 0.011 | 0.66   | 0.81             | 0.013  | 0.014 | 0.88   | 0.88             | 0.040  | 0.012 | 0.58   | 0.75             |
| GA at delivery                              | 0.123  | 0.001 | 0.11   | 0.31             | 0.062  | 0.002 | 0.46   | 0.76             | 0.167  | 0.002 | 0.07   | 0.49             | 0.003  | 0.002 | 0.97   | 0.97             |
| GA at T2                                    | 0.019  | 0.000 | 0.74   | 0.79             | 0.085  | 0.001 | 0.17   | 0.70             | 0.110  | 0.001 | 0.12   | 0.37             | 0.057  | 0.001 | 0.33   | 0.98             |
| PMA at scan                                 | 0.524  | 0.001 | <0.001 | <b>&lt;0.001</b> | -0.529 | 0.002 | <0.001 | <b>&lt;0.001</b> | -0.220 | 0.002 | <0.001 | <b>&lt;0.001</b> | -0.592 | 0.002 | <0.001 | <b>&lt;0.001</b> |
| <b>Inferior Fronto-Occipital Fasciculus</b> |        |       |        |                  |        |       |        |                  |        |       |        |                  |        |       |        |                  |
| IL-10 T2                                    | -0.124 | 0.002 | 0.01   | <b>0.04</b>      | 0.054  | 0.003 | 0.30   | 0.54             | -0.032 | 0.002 | 0.62   | 0.77             | 0.079  | 0.004 | 0.12   | 0.22             |
| Sex                                         | 0.025  | 0.003 | 0.63   | 0.88             | -0.132 | 0.006 | 0.01   | <b>0.04</b>      | -0.209 | 0.004 | <0.01  | <b>&lt;0.01</b>  | -0.097 | 0.007 | 0.06   | 0.18             |
| NICU stay                                   | -0.033 | 0.008 | 0.60   | 0.89             | 0.059  | 0.013 | 0.38   | 0.81             | 0.055  | 0.010 | 0.50   | 0.88             | 0.055  | 0.016 | 0.39   | 0.75             |
| GA at delivery                              | 0.101  | 0.001 | 0.14   | 0.31             | -0.019 | 0.002 | 0.79   | 0.79             | 0.101  | 0.002 | 0.25   | 0.56             | -0.047 | 0.002 | 0.50   | 0.74             |
| GA at T2                                    | 0.053  | 0.000 | 0.31   | 0.79             | 0.024  | 0.001 | 0.65   | 0.91             | 0.118  | 0.001 | 0.07   | 0.37             | 0.000  | 0.001 | 0.99   | 0.99             |
| PMA at scan                                 | 0.634  | 0.001 | <0.001 | <b>&lt;0.001</b> | -0.643 | 0.002 | <0.001 | <b>&lt;0.001</b> | -0.410 | 0.002 | <0.001 | <b>&lt;0.001</b> | -0.655 | 0.002 | <0.001 | <b>&lt;0.001</b> |
| <b>Anterior Limb of Internal Capsule</b>    |        |       |        |                  |        |       |        |                  |        |       |        |                  |        |       |        |                  |
| IL-10 T2                                    | -0.111 | 0.001 | 0.02   | <b>0.04</b>      | 0.036  | 0.003 | 0.52   | 0.67             | -0.018 | 0.003 | 0.77   | 0.77             | 0.053  | 0.004 | 0.32   | 0.48             |
| Sex                                         | 0.023  | 0.003 | 0.64   | 0.88             | -0.065 | 0.007 | 0.25   | 0.35             | -0.076 | 0.006 | 0.25   | 0.25             | -0.058 | 0.008 | 0.29   | 0.52             |
| NICU stay                                   | -0.048 | 0.007 | 0.45   | 0.89             | 0.056  | 0.015 | 0.44   | 0.81             | 0.039  | 0.013 | 0.64   | 0.88             | 0.058  | 0.017 | 0.40   | 0.75             |
| GA at delivery                              | 0.165  | 0.001 | 0.02   | 0.14             | -0.024 | 0.002 | 0.75   | 0.79             | 0.084  | 0.002 | 0.34   | 0.60             | -0.059 | 0.003 | 0.42   | 0.74             |
| GA at T2                                    | -0.024 | 0.000 | 0.64   | 0.79             | 0.069  | 0.001 | 0.23   | 0.70             | 0.093  | 0.001 | 0.16   | 0.37             | 0.059  | 0.001 | 0.29   | 0.98             |
| PMA at scan                                 | 0.617  | 0.001 | <0.001 | <b>&lt;0.001</b> | -0.590 | 0.002 | <0.001 | <b>&lt;0.001</b> | -0.427 | 0.002 | <0.001 | <b>&lt;0.001</b> | -0.617 | 0.003 | <0.001 | <b>&lt;0.001</b> |
| <b>Inferior Cingulum Bundle</b>             |        |       |        |                  |        |       |        |                  |        |       |        |                  |        |       |        |                  |
| IL-10 T2                                    | -0.147 | 0.001 | 0.02   | <b>0.04</b>      | 0.129  | 0.002 | 0.02   | 0.06             | 0.023  | 0.002 | 0.72   | 0.77             | 0.159  | 0.002 | <0.01  | <b>0.01</b>      |
| Sex                                         | -0.007 | 0.003 | 0.91   | 0.91             | -0.223 | 0.003 | <0.001 | <b>&lt;0.01</b>  | -0.220 | 0.004 | <0.01  | <b>&lt;0.01</b>  | -0.190 | 0.003 | <0.01  | <b>&lt;0.01</b>  |
| NICU stay                                   | -0.103 | 0.006 | 0.20   | 0.89             | 0.043  | 0.007 | 0.54   | 0.81             | -0.048 | 0.010 | 0.57   | 0.88             | 0.086  | 0.008 | 0.21   | 0.75             |
| GA at delivery                              | -0.135 | 0.001 | 0.12   | 0.31             | 0.074  | 0.001 | 0.33   | 0.76             | -0.047 | 0.001 | 0.60   | 0.70             | 0.125  | 0.001 | 0.09   | 0.45             |
| GA at T2                                    | -0.017 | 0.000 | 0.79   | 0.79             | 0.089  | 0.000 | 0.12   | 0.70             | 0.080  | 0.001 | 0.24   | 0.43             | 0.091  | 0.000 | 0.10   | 0.91             |
| PMA at scan                                 | 0.446  | 0.001 | <0.001 | <b>&lt;0.001</b> | -0.608 | 0.001 | <0.001 | <b>&lt;0.001</b> | -0.297 | 0.001 | <0.001 | <b>&lt;0.001</b> | -0.650 | 0.001 | <0.001 | <b>&lt;0.001</b> |
| <b>Fornix</b>                               |        |       |        |                  |        |       |        |                  |        |       |        |                  |        |       |        |                  |
| IL-10 T2                                    | 0.113  | 0.001 | 0.08   | 0.10             | 0.006  | 0.002 | 0.92   | 0.92             | 0.099  | 0.002 | 0.11   | 0.48             | -0.043 | 0.002 | 0.43   | 0.55             |
| Sex                                         | -0.107 | 0.002 | 0.10   | 0.88             | -0.061 | 0.003 | 0.27   | 0.35             | -0.111 | 0.004 | 0.08   | 0.17             | -0.020 | 0.003 | 0.72   | 0.72             |
| NICU stay                                   | 0.018  | 0.005 | 0.82   | 0.89             | -0.025 | 0.008 | 0.72   | 0.81             | -0.023 | 0.010 | 0.77   | 0.88             | -0.023 | 0.008 | 0.74   | 0.84             |
| GA at delivery                              | 0.048  | 0.001 | 0.59   | 0.66             | 0.036  | 0.001 | 0.63   | 0.79             | 0.071  | 0.002 | 0.40   | 0.60             | 0.014  | 0.001 | 0.85   | 0.74             |
| GA at T2                                    | 0.019  | 0.000 | 0.78   | 0.79             | -0.014 | 0.000 | 0.81   | 0.91             | -0.007 | 0.001 | 0.91   | 0.91             | -0.015 | 0.000 | 0.79   | 0.99             |
| PMA at scan                                 | 0.354  | 0.001 | <0.001 | <b>&lt;0.001</b> | -0.639 | 0.001 | <0.001 | <b>&lt;0.001</b> | -0.493 | 0.002 | <0.001 | <b>&lt;0.001</b> | -0.641 | 0.001 | <0.001 | <b>&lt;0.001</b> |



**IL-10 Trimester 3**

|                                             | FA      |       |        |                  | MD      |       |        |                  | AD      |       |        |                  | RD      |       |        |                  |
|---------------------------------------------|---------|-------|--------|------------------|---------|-------|--------|------------------|---------|-------|--------|------------------|---------|-------|--------|------------------|
|                                             | $\beta$ | SE    | $p$    | $q$              | $\beta$ | SE    | $p$    | $q$              | $\beta$ | SE    | $p$    | $q$              | $\beta$ | SE    | $p$    | $q$              |
| <b>Corpus Callosum</b>                      |         |       |        |                  |         |       |        |                  |         |       |        |                  |         |       |        |                  |
| IL-10 T3                                    | -0.081  | 0.002 | 0.14   | 0.21             | 0.053   | 0.002 | 0.31   | 0.47             | -0.066  | 0.002 | 0.30   | 0.68             | 0.065   | 0.002 | 0.21   | 0.27             |
| Sex                                         | -0.127  | 0.003 | 0.02   | 0.16             | 0.006   | 0.003 | 0.91   | 0.91             | -0.083  | 0.004 | 0.18   | 0.26             | 0.068   | 0.005 | 0.18   | 0.54             |
| NICU stay                                   | -0.029  | 0.009 | 0.63   | 0.66             | -0.034  | 0.009 | 0.58   | 0.89             | 0.018   | 0.009 | 0.80   | 0.80             | -0.018  | 0.012 | 0.76   | 0.88             |
| GA at delivery                              | 0.004   | 0.001 | 0.95   | 0.95             | 0.016   | 0.001 | 0.81   | 0.89             | 0.101   | 0.002 | 0.22   | 0.60             | -0.012  | 0.002 | 0.86   | 0.92             |
| GA at T3                                    | 0.070   | 0.001 | 0.21   | 0.37             | -0.057  | 0.001 | 0.29   | 0.95             | 0.009   | 0.001 | 0.89   | 0.91             | -0.076  | 0.001 | 0.15   | 0.62             |
| PMA at scan                                 | 0.463   | 0.001 | <0.001 | <b>&lt;0.001</b> | -0.564  | 0.001 | <0.001 | <b>&lt;0.001</b> | -0.190  | 0.001 | 0.01   | <b>0.01</b>      | -0.558  | 0.002 | <0.001 | <b>&lt;0.001</b> |
| <b>Superior Cingulum Bundle</b>             |         |       |        |                  |         |       |        |                  |         |       |        |                  |         |       |        |                  |
| IL-10 T3                                    | -0.097  | 0.002 | 0.11   | 0.19             | 0.064   | 0.002 | 0.25   | 0.47             | 0.021   | 0.003 | 0.71   | 0.71             | 0.083   | 0.003 | 0.14   | 0.25             |
| Sex                                         | -0.065  | 0.003 | 0.27   | 0.60             | -0.037  | 0.005 | 0.50   | 0.75             | -0.106  | 0.005 | 0.07   | 0.15             | -0.002  | 0.005 | 0.97   | 0.97             |
| NICU stay                                   | -0.065  | 0.008 | 0.34   | 0.66             | 0.014   | 0.012 | 0.83   | 0.89             | -0.042  | 0.014 | 0.54   | 0.71             | 0.034   | 0.014 | 0.59   | 0.88             |
| GA at delivery                              | 0.017   | 0.001 | 0.82   | 0.93             | 0.085   | 0.002 | 0.23   | 0.89             | 0.095   | 0.002 | 0.21   | 0.60             | 0.065   | 0.002 | 0.37   | 0.92             |
| GA at T3                                    | -0.080  | 0.001 | 0.19   | 0.37             | 0.023   | 0.001 | 0.69   | 0.95             | -0.036  | 0.001 | 0.56   | 0.91             | 0.045   | 0.001 | 0.44   | 0.68             |
| PMA at scan                                 | 0.306   | 0.001 | <0.001 | <b>&lt;0.001</b> | -0.514  | 0.002 | <0.001 | <b>&lt;0.001</b> | -0.405  | 0.002 | <0.001 | <b>&lt;0.001</b> | -0.485  | 0.002 | <0.001 | <b>&lt;0.001</b> |
| <b>Corticospinal Tract</b>                  |         |       |        |                  |         |       |        |                  |         |       |        |                  |         |       |        |                  |
| IL-10 T3                                    | -0.228  | 0.002 | <0.001 | <b>&lt;0.001</b> | 0.108   | 0.002 | 0.02   | 0.09             | -0.039  | 0.002 | 0.45   | 0.68             | 0.148   | 0.003 | <0.01  | <b>0.01</b>      |
| Sex                                         | 0.007   | 0.003 | 0.89   | 0.91             | -0.050  | 0.004 | 0.26   | 0.48             | -0.073  | 0.004 | 0.16   | 0.26             | -0.036  | 0.005 | 0.43   | 0.73             |
| NICU stay                                   | -0.064  | 0.008 | 0.26   | 0.66             | 0.028   | 0.011 | 0.60   | 0.89             | -0.029  | 0.010 | 0.63   | 0.71             | 0.035   | 0.014 | 0.51   | 0.88             |
| GA at delivery                              | -0.024  | 0.001 | 0.71   | 0.93             | 0.008   | 0.002 | 0.89   | 0.89             | -0.003  | 0.002 | 0.97   | 0.97             | 0.034   | 0.002 | 0.55   | 0.92             |
| GA at T3                                    | 0.086   | 0.001 | 0.10   | 0.37             | -0.045  | 0.001 | 0.35   | 0.95             | 0.017   | 0.001 | 0.75   | 0.91             | -0.060  | 0.001 | 0.21   | 0.62             |
| PMA at scan                                 | 0.520   | 0.001 | <0.001 | <b>&lt;0.001</b> | -0.659  | 0.002 | <0.001 | <b>&lt;0.001</b> | -0.571  | 0.002 | <0.001 | <b>&lt;0.001</b> | -0.645  | 0.002 | <0.001 | <b>&lt;0.001</b> |
| <b>Optic Radiation</b>                      |         |       |        |                  |         |       |        |                  |         |       |        |                  |         |       |        |                  |
| IL-10 T3                                    | -0.058  | 0.002 | 0.27   | 0.30             | 0.069   | 0.003 | 0.17   | 0.47             | 0.047   | 0.003 | 0.43   | 0.68             | 0.073   | 0.003 | 0.13   | 0.25             |
| Sex                                         | -0.006  | 0.003 | 0.91   | 0.91             | -0.111  | 0.005 | 0.03   | 0.12             | -0.174  | 0.005 | <0.01  | <b>0.03</b>      | -0.081  | 0.006 | 0.09   | 0.42             |
| NICU stay                                   | -0.081  | 0.009 | 0.18   | 0.66             | 0.077   | 0.013 | 0.19   | 0.83             | 0.035   | 0.014 | 0.62   | 0.71             | 0.085   | 0.015 | 0.13   | 0.63             |
| GA at delivery                              | -0.018  | 0.001 | 0.79   | 0.93             | -0.032  | 0.002 | 0.62   | 0.89             | -0.046  | 0.002 | 0.55   | 0.62             | -0.018  | 0.002 | 0.77   | 0.92             |
| GA at T3                                    | 0.047   | 0.001 | 0.39   | 0.44             | 0.017   | 0.001 | 0.75   | 0.95             | 0.073   | 0.001 | 0.24   | 0.91             | -0.004  | 0.001 | 0.94   | 0.96             |
| PMA at scan                                 | 0.541   | 0.001 | <0.001 | <b>&lt;0.001</b> | -0.556  | 0.002 | <0.001 | <b>&lt;0.001</b> | -0.262  | 0.002 | <0.001 | <b>&lt;0.001</b> | -0.598  | 0.002 | <0.001 | <b>&lt;0.001</b> |
| <b>Uncinate Fasciculus</b>                  |         |       |        |                  |         |       |        |                  |         |       |        |                  |         |       |        |                  |
| IL-10 T3                                    | -0.062  | 0.001 | 0.25   | 0.30             | -0.127  | 0.002 | 0.02   | 0.09             | -0.187  | 0.003 | <0.01  | <b>0.01</b>      | -0.079  | 0.002 | 0.13   | 0.25             |
| Sex                                         | -0.060  | 0.003 | 0.26   | 0.60             | -0.067  | 0.004 | 0.21   | 0.48             | -0.116  | 0.005 | 0.05   | 0.14             | -0.036  | 0.005 | 0.48   | 0.73             |
| NICU stay                                   | -0.049  | 0.007 | 0.43   | 0.66             | -0.130  | 0.011 | 0.04   | 0.34             | -0.176  | 0.014 | 0.01   | 0.09             | -0.085  | 0.012 | 0.16   | 0.63             |
| GA at delivery                              | 0.122   | 0.001 | 0.08   | 0.49             | 0.029   | 0.002 | 0.68   | 0.89             | 0.114   | 0.002 | 0.13   | 0.60             | -0.020  | 0.002 | 0.76   | 0.92             |
| GA at T3                                    | -0.020  | 0.000 | 0.72   | 0.72             | -0.001  | 0.001 | 0.98   | 0.98             | -0.008  | 0.001 | 0.90   | 0.91             | 0.003   | 0.001 | 0.96   | 0.96             |
| PMA at scan                                 | 0.452   | 0.001 | <0.001 | <b>&lt;0.001</b> | -0.533  | 0.002 | <0.001 | <b>&lt;0.001</b> | -0.278  | 0.002 | <0.001 | <b>&lt;0.001</b> | -0.578  | 0.002 | <0.001 | <b>&lt;0.001</b> |
| <b>Inferior Fronto-Occipital Fasciculus</b> |         |       |        |                  |         |       |        |                  |         |       |        |                  |         |       |        |                  |

|                |        |       |        |                  |        |       |        |                  |        |       |        |                  |        |       |        |                  |
|----------------|--------|-------|--------|------------------|--------|-------|--------|------------------|--------|-------|--------|------------------|--------|-------|--------|------------------|
| IL-10 T3       | -0.117 | 0.002 | 0.01   | 0.06             | 0.029  | 0.002 | 0.55   | 0.66             | -0.073 | 0.002 | 0.21   | 0.62             | 0.059  | 0.003 | 0.21   | 0.27             |
| Sex            | -0.023 | 0.003 | 0.62   | 0.80             | -0.086 | 0.005 | 0.07   | 0.22             | -0.158 | 0.004 | 0.01   | <b>0.03</b>      | -0.052 | 0.006 | 0.26   | 0.60             |
| NICU stay      | -0.040 | 0.008 | 0.46   | 0.66             | -0.008 | 0.013 | 0.89   | 0.89             | -0.037 | 0.010 | 0.58   | 0.71             | 0.008  | 0.015 | 0.88   | 0.88             |
| GA at delivery | 0.069  | 0.001 | 0.26   | 0.62             | -0.021 | 0.002 | 0.74   | 0.89             | 0.063  | 0.002 | 0.40   | 0.60             | -0.037 | 0.002 | 0.55   | 0.92             |
| GA at T3       | 0.048  | 0.001 | 0.33   | 0.42             | -0.014 | 0.001 | 0.78   | 0.95             | 0.037  | 0.001 | 0.54   | 0.91             | -0.028 | 0.001 | 0.57   | 0.74             |
| PMA at scan    | 0.591  | 0.001 | <0.001 | <b>&lt;0.001</b> | -0.628 | 0.002 | <0.001 | <b>&lt;0.001</b> | -0.405 | 0.002 | <0.001 | <b>&lt;0.001</b> | -0.638 | 0.002 | <0.001 | <b>&lt;0.001</b> |

**Anterior Limb of Internal Capsule**

|                |        |       |        |                  |        |       |        |                  |        |       |        |                  |        |       |        |                  |
|----------------|--------|-------|--------|------------------|--------|-------|--------|------------------|--------|-------|--------|------------------|--------|-------|--------|------------------|
| IL-10 T3       | -0.082 | 0.001 | 0.08   | 0.18             | -0.022 | 0.003 | 0.66   | 0.66             | -0.098 | 0.003 | 0.09   | 0.40             | 0.003  | 0.003 | 0.95   | 0.95             |
| Sex            | -0.045 | 0.003 | 0.33   | 0.60             | -0.020 | 0.006 | 0.69   | 0.85             | -0.043 | 0.005 | 0.44   | 0.44             | -0.007 | 0.007 | 0.88   | 0.97             |
| NICU stay      | -0.025 | 0.007 | 0.64   | 0.66             | -0.031 | 0.015 | 0.59   | 0.89             | -0.072 | 0.013 | 0.27   | 0.71             | -0.015 | 0.017 | 0.79   | 0.88             |
| GA at delivery | 0.097  | 0.001 | 0.11   | 0.49             | -0.013 | 0.002 | 0.84   | 0.89             | 0.068  | 0.002 | 0.35   | 0.60             | -0.034 | 0.003 | 0.58   | 0.92             |
| GA at T3       | 0.056  | 0.000 | 0.25   | 0.37             | -0.033 | 0.001 | 0.53   | 0.95             | -0.007 | 0.001 | 0.91   | 0.91             | -0.040 | 0.001 | 0.43   | 0.68             |
| PMA at scan    | 0.589  | 0.001 | <0.001 | <b>&lt;0.001</b> | -0.600 | 0.002 | <0.001 | <b>&lt;0.001</b> | -0.465 | 0.002 | <0.001 | <b>&lt;0.001</b> | -0.619 | 0.003 | <0.001 | <b>&lt;0.001</b> |

**Inferior Cingulum Bundle**

|                |        |       |        |                  |        |       |        |                  |        |       |        |                  |        |       |        |             |
|----------------|--------|-------|--------|------------------|--------|-------|--------|------------------|--------|-------|--------|------------------|--------|-------|--------|-------------|
| IL-10 T3       | -0.130 | 0.001 | 0.03   | 0.08             | 0.057  | 0.001 | 0.28   | 0.47             | -0.032 | 0.002 | 0.59   | 0.71             | 0.086  | 0.002 | 0.09   | 0.25        |
| Sex            | 0.048  | 0.002 | 0.40   | 0.60             | -0.125 | 0.003 | 0.02   | 0.12             | -0.075 | 0.004 | 0.21   | 0.26             | -0.126 | 0.003 | 0.01   | 0.11        |
| NICU stay      | -0.134 | 0.006 | 0.05   | 0.42             | 0.010  | 0.007 | 0.86   | 0.89             | -0.081 | 0.009 | 0.24   | 0.71             | 0.074  | 0.008 | 0.21   | 0.63        |
| GA at delivery | -0.082 | 0.001 | 0.28   | 0.62             | 0.135  | 0.001 | 0.04   | 0.40             | 0.067  | 0.001 | 0.38   | 0.60             | 0.151  | 0.001 | 0.02   | 0.21        |
| GA at T3       | -0.072 | 0.000 | 0.23   | 0.37             | 0.011  | 0.001 | 0.84   | 0.95             | -0.042 | 0.001 | 0.50   | 0.91             | 0.040  | 0.001 | 0.45   | 0.68        |
| PMA at scan    | 0.363  | 0.001 | <0.001 | <b>&lt;0.001</b> | -0.603 | 0.001 | <0.001 | <b>&lt;0.001</b> | -0.344 | 0.001 | <0.001 | <b>&lt;0.001</b> | -0.612 | 0.001 | <0.001 | <b>0.00</b> |

**Fornix**

|                |        |       |        |                  |        |       |        |                  |        |       |        |                  |        |       |        |                  |
|----------------|--------|-------|--------|------------------|--------|-------|--------|------------------|--------|-------|--------|------------------|--------|-------|--------|------------------|
| IL-10 T3       | -0.028 | 0.001 | 0.64   | 0.64             | 0.027  | 0.002 | 0.59   | 0.66             | 0.024  | 0.002 | 0.68   | 0.71             | 0.029  | 0.002 | 0.56   | 0.63             |
| Sex            | -0.082 | 0.002 | 0.16   | 0.60             | -0.015 | 0.003 | 0.76   | 0.85             | -0.057 | 0.004 | 0.31   | 0.35             | 0.013  | 0.003 | 0.79   | 0.97             |
| NICU stay      | -0.030 | 0.005 | 0.66   | 0.66             | -0.028 | 0.008 | 0.63   | 0.89             | -0.049 | 0.010 | 0.45   | 0.71             | -0.012 | 0.008 | 0.83   | 0.88             |
| GA at delivery | 0.033  | 0.001 | 0.66   | 0.93             | 0.021  | 0.001 | 0.75   | 0.89             | 0.047  | 0.002 | 0.51   | 0.62             | 0.007  | 0.001 | 0.92   | 0.92             |
| GA at T3       | -0.084 | 0.000 | 0.17   | 0.37             | 0.045  | 0.001 | 0.39   | 0.95             | -0.009 | 0.001 | 0.88   | 0.91             | 0.066  | 0.001 | 0.20   | 0.62             |
| PMA at scan    | 0.355  | 0.001 | <0.001 | <b>&lt;0.001</b> | -0.621 | 0.001 | <0.001 | <b>&lt;0.001</b> | -0.475 | 0.002 | <0.001 | <b>&lt;0.001</b> | -0.629 | 0.001 | <0.001 | <b>&lt;0.001</b> |

**TNF-α Trimester 1**

|  | FA |    |   |   | MD |    |   |   | AD |    |   |   | RD |    |   |   |
|--|----|----|---|---|----|----|---|---|----|----|---|---|----|----|---|---|
|  | β  | SE | p | q | β  | SE | p | q | β  | SE | p | q | β  | SE | p | q |

**Corpus Callosum**

|                |        |       |        |                  |        |       |        |                  |        |       |      |      |        |       |        |                  |
|----------------|--------|-------|--------|------------------|--------|-------|--------|------------------|--------|-------|------|------|--------|-------|--------|------------------|
| TNF-α T1       | -0.007 | 0.002 | 0.91   | 0.91             | 0.008  | 0.002 | 0.89   | 0.90             | 0.031  | 0.002 | 0.67 | 0.95 | -0.005 | 0.003 | 0.94   | 0.94             |
| Sex            | -0.138 | 0.004 | 0.03   | 0.28             | 0.076  | 0.004 | 0.22   | 0.63             | -0.075 | 0.004 | 0.30 | 0.55 | 0.118  | 0.005 | 0.05   | 0.49             |
| NICU stay      | 0.039  | 0.009 | 0.60   | 0.92             | -0.068 | 0.009 | 0.35   | 0.71             | 0.088  | 0.010 | 0.28 | 0.66 | -0.085 | 0.012 | 0.23   | 0.79             |
| GA at delivery | -0.004 | 0.002 | 0.96   | 0.96             | 0.012  | 0.002 | 0.87   | 0.92             | -0.027 | 0.002 | 0.76 | 0.85 | 0.001  | 0.002 | 0.99   | 0.99             |
| GA at T1       | -0.041 | 0.001 | 0.52   | 0.84             | 0.074  | 0.001 | 0.23   | 0.94             | 0.050  | 0.001 | 0.49 | 0.75 | 0.068  | 0.001 | 0.27   | 0.91             |
| PMA at scan    | 0.456  | 0.002 | <0.001 | <b>&lt;0.001</b> | -0.517 | 0.002 | <0.001 | <b>&lt;0.001</b> | -0.069 | 0.002 | 0.39 | 0.39 | -0.522 | 0.002 | <0.001 | <b>&lt;0.001</b> |

**Superior Cingulum Bundle**

|          |        |       |      |      |        |       |      |      |       |       |      |      |        |       |      |      |
|----------|--------|-------|------|------|--------|-------|------|------|-------|-------|------|------|--------|-------|------|------|
| TNF-α T1 | -0.008 | 0.002 | 0.90 | 0.91 | -0.008 | 0.003 | 0.90 | 0.90 | 0.006 | 0.004 | 0.93 | 0.95 | -0.008 | 0.003 | 0.90 | 0.94 |
|----------|--------|-------|------|------|--------|-------|------|------|-------|-------|------|------|--------|-------|------|------|

|                                             |        |       |        |                  |        |       |        |                  |        |       |        |                  |        |       |        |                  |
|---------------------------------------------|--------|-------|--------|------------------|--------|-------|--------|------------------|--------|-------|--------|------------------|--------|-------|--------|------------------|
| Sex                                         | -0.108 | 0.003 | 0.12   | 0.34             | -0.043 | 0.005 | 0.50   | 0.75             | -0.134 | 0.006 | 0.05   | 0.11             | 0.001  | 0.006 | 0.99   | 0.99             |
| NICU stay                                   | 0.022  | 0.008 | 0.78   | 0.92             | 0.068  | 0.012 | 0.37   | 0.71             | 0.073  | 0.014 | 0.36   | 0.66             | 0.048  | 0.014 | 0.52   | 0.79             |
| GA at delivery                              | 0.115  | 0.001 | 0.18   | 0.40             | 0.011  | 0.002 | 0.89   | 0.92             | 0.092  | 0.002 | 0.28   | 0.85             | -0.035 | 0.002 | 0.66   | 0.85             |
| GA at T1                                    | -0.020 | 0.001 | 0.77   | 0.86             | -0.019 | 0.001 | 0.77   | 0.94             | -0.047 | 0.001 | 0.49   | 0.75             | -0.007 | 0.001 | 0.91   | 0.91             |
| PMA at scan                                 | 0.288  | 0.001 | <0.001 | <b>&lt;0.001</b> | -0.476 | 0.002 | <0.001 | <b>&lt;0.001</b> | -0.373 | 0.002 | <0.001 | <b>&lt;0.001</b> | -0.454 | 0.002 | <0.001 | <b>&lt;0.001</b> |
| <b>Corticospinal Tract</b>                  |        |       |        |                  |        |       |        |                  |        |       |        |                  |        |       |        |                  |
| TNF-α T1                                    | 0.057  | 0.002 | 0.36   | 0.66             | -0.007 | 0.003 | 0.90   | 0.90             | 0.054  | 0.002 | 0.37   | 0.84             | -0.027 | 0.003 | 0.64   | 0.94             |
| Sex                                         | -0.076 | 0.003 | 0.23   | 0.33             | 0.010  | 0.005 | 0.86   | 0.92             | -0.042 | 0.004 | 0.49   | 0.55             | 0.029  | 0.006 | 0.62   | 0.96             |
| NICU stay                                   | 0.113  | 0.008 | 0.12   | 0.81             | 0.011  | 0.011 | 0.86   | 0.96             | 0.103  | 0.010 | 0.14   | 0.66             | -0.022 | 0.014 | 0.74   | 0.84             |
| GA at delivery                              | -0.058 | 0.001 | 0.46   | 0.37             | 0.069  | 0.002 | 0.32   | 0.72             | 0.053  | 0.002 | 0.48   | 0.85             | 0.069  | 0.002 | 0.33   | 0.82             |
| GA at T1                                    | 0.028  | 0.001 | 0.65   | 0.82             | 0.025  | 0.001 | 0.66   | 0.94             | 0.071  | 0.001 | 0.24   | 0.75             | 0.007  | 0.001 | 0.91   | 0.91             |
| PMA at scan                                 | 0.521  | 0.001 | <0.001 | <b>&lt;0.001</b> | -0.662 | 0.002 | <0.001 | <b>&lt;0.001</b> | -0.546 | 0.002 | <0.001 | <b>&lt;0.001</b> | -0.650 | 0.002 | <0.001 | <b>&lt;0.001</b> |
| <b>Optic Radiation</b>                      |        |       |        |                  |        |       |        |                  |        |       |        |                  |        |       |        |                  |
| TNF-α T1                                    | 0.063  | 0.002 | 0.30   | 0.92             | 0.011  | 0.003 | 0.86   | 0.90             | 0.069  | 0.003 | 0.31   | 0.84             | -0.007 | 0.004 | 0.90   | 0.94             |
| Sex                                         | -0.084 | 0.003 | 0.17   | 0.16             | -0.066 | 0.006 | 0.28   | 0.63             | -0.168 | 0.006 | 0.02   | 0.05             | -0.027 | 0.007 | 0.64   | 0.96             |
| NICU stay                                   | -0.087 | 0.008 | 0.22   | 0.81             | 0.067  | 0.014 | 0.34   | 0.71             | 0.037  | 0.014 | 0.65   | 0.73             | 0.074  | 0.015 | 0.27   | 0.79             |
| GA at delivery                              | -0.115 | 0.001 | 0.12   | 0.40             | 0.032  | 0.002 | 0.67   | 0.92             | -0.032 | 0.002 | 0.71   | 0.85             | 0.055  | 0.003 | 0.45   | 0.82             |
| GA at T1                                    | 0.000  | 0.001 | 1.00   | 1.00             | 0.013  | 0.001 | 0.83   | 0.94             | 0.042  | 0.001 | 0.54   | 0.75             | 0.014  | 0.002 | 0.81   | 0.91             |
| PMA at scan                                 | 0.567  | 0.001 | <0.001 | <b>&lt;0.001</b> | -0.561 | 0.002 | <0.001 | <b>&lt;0.001</b> | -0.286 | 0.002 | <0.001 | <b>&lt;0.001</b> | -0.607 | 0.003 | <0.001 | <b>&lt;0.001</b> |
| <b>Uncinate Fasciculus</b>                  |        |       |        |                  |        |       |        |                  |        |       |        |                  |        |       |        |                  |
| TNF-α T1                                    | -0.086 | 0.002 | 0.16   | 0.54             | 0.053  | 0.003 | 0.39   | 0.90             | -0.004 | 0.003 | 0.95   | 0.95             | 0.068  | 0.003 | 0.25   | 0.75             |
| Sex                                         | -0.115 | 0.003 | 0.06   | 0.29             | -0.080 | 0.005 | 0.20   | 0.63             | -0.169 | 0.006 | 0.02   | 0.05             | -0.030 | 0.005 | 0.61   | 0.96             |
| NICU stay                                   | 0.022  | 0.007 | 0.76   | 0.92             | 0.004  | 0.011 | 0.96   | 0.96             | 0.002  | 0.014 | 0.98   | 0.98             | 0.007  | 0.012 | 0.92   | 0.92             |
| GA at delivery                              | 0.087  | 0.001 | 0.26   | 0.47             | 0.121  | 0.002 | 0.12   | 0.54             | 0.192  | 0.002 | 0.03   | 0.25             | 0.067  | 0.002 | 0.37   | 0.82             |
| GA at T1                                    | -0.091 | 0.001 | 0.14   | 0.84             | 0.022  | 0.001 | 0.72   | 0.94             | -0.030 | 0.001 | 0.66   | 0.75             | 0.035  | 0.001 | 0.56   | 0.91             |
| PMA at scan                                 | 0.455  | 0.001 | <0.001 | <b>&lt;0.001</b> | -0.556 | 0.002 | <0.001 | <b>&lt;0.001</b> | -0.297 | 0.002 | <0.001 | <b>&lt;0.001</b> | -0.600 | 0.002 | <0.001 | <b>&lt;0.001</b> |
| <b>Inferior Fronto-Occipital Fasciculus</b> |        |       |        |                  |        |       |        |                  |        |       |        |                  |        |       |        |                  |
| TNF-α T1                                    | 0.054  | 0.002 | 0.33   | 0.54             | 0.008  | 0.003 | 0.89   | 0.90             | 0.092  | 0.003 | 0.16   | 0.83             | -0.013 | 0.004 | 0.81   | 0.94             |
| Sex                                         | -0.048 | 0.003 | 0.39   | 0.44             | -0.084 | 0.005 | 0.13   | 0.63             | -0.175 | 0.005 | 0.01   | 0.05             | -0.044 | 0.007 | 0.42   | 0.96             |
| NICU stay                                   | -0.017 | 0.008 | 0.79   | 0.92             | 0.050  | 0.012 | 0.44   | 0.71             | 0.070  | 0.010 | 0.36   | 0.66             | 0.040  | 0.015 | 0.53   | 0.79             |
| GA at delivery                              | 0.026  | 0.001 | 0.71   | 0.79             | -0.007 | 0.002 | 0.92   | 0.92             | 0.032  | 0.002 | 0.70   | 0.85             | -0.015 | 0.003 | 0.82   | 0.92             |
| GA at T1                                    | -0.045 | 0.001 | 0.42   | 0.84             | 0.023  | 0.001 | 0.67   | 0.94             | -0.007 | 0.001 | 0.92   | 0.92             | 0.039  | 0.002 | 0.47   | 0.91             |
| PMA at scan                                 | 0.628  | 0.001 | <0.001 | <b>&lt;0.001</b> | -0.641 | 0.002 | <0.001 | <b>&lt;0.001</b> | -0.389 | 0.002 | <0.001 | <b>&lt;0.001</b> | -0.656 | 0.003 | <0.001 | <b>&lt;0.001</b> |
| <b>Anterior Limb of Internal Capsule</b>    |        |       |        |                  |        |       |        |                  |        |       |        |                  |        |       |        |                  |
| TNF-α T1                                    | 0.057  | 0.002 | 0.30   | 0.54             | -0.010 | 0.004 | 0.87   | 0.90             | 0.030  | 0.003 | 0.66   | 0.95             | -0.024 | 0.004 | 0.68   | 0.94             |
| Sex                                         | -0.061 | 0.003 | 0.27   | 0.35             | -0.006 | 0.007 | 0.92   | 0.92             | -0.040 | 0.006 | 0.55   | 0.55             | 0.008  | 0.008 | 0.89   | 0.99             |
| NICU stay                                   | 0.010  | 0.007 | 0.88   | 0.92             | 0.068  | 0.015 | 0.33   | 0.71             | 0.096  | 0.014 | 0.22   | 0.66             | 0.054  | 0.017 | 0.42   | 0.79             |
| GA at delivery                              | 0.104  | 0.001 | 0.13   | 0.40             | -0.020 | 0.003 | 0.79   | 0.92             | 0.043  | 0.002 | 0.61   | 0.85             | -0.040 | 0.003 | 0.57   | 0.85             |

|                                            |         |       |          |                  |         |       |          |                  |         |       |          |                  |         |       |          |                  |
|--------------------------------------------|---------|-------|----------|------------------|---------|-------|----------|------------------|---------|-------|----------|------------------|---------|-------|----------|------------------|
| GA at T1                                   | -0.030  | 0.001 | 0.59     | 0.84             | 0.047   | 0.002 | 0.43     | 0.94             | 0.043   | 0.001 | 0.53     | 0.75             | 0.045   | 0.002 | 0.43     | 0.91             |
| PMA at scan                                | 0.589   | 0.001 | <0.001   | <b>&lt;0.001</b> | -0.552  | 0.003 | <0.001   | <b>&lt;0.001</b> | -0.367  | 0.002 | <0.001   | <b>&lt;0.001</b> | -0.587  | 0.003 | <0.001   | <b>&lt;0.001</b> |
| <b>Inferior Cingulum Bundle</b>            |         |       |          |                  |         |       |          |                  |         |       |          |                  |         |       |          |                  |
| TNF- $\alpha$ T1                           | -0.118  | 0.001 | 0.08     | 0.54             | 0.058   | 0.002 | 0.35     | 0.90             | -0.014  | 0.002 | 0.84     | 0.95             | 0.088   | 0.002 | 0.14     | 0.69             |
| Sex                                        | -0.006  | 0.002 | 0.93     | 0.93             | -0.056  | 0.003 | 0.36     | 0.66             | -0.053  | 0.004 | 0.45     | 0.55             | -0.046  | 0.003 | 0.45     | 0.96             |
| NICU stay                                  | 0.086   | 0.006 | 0.27     | 0.81             | 0.004   | 0.007 | 0.96     | 0.96             | 0.052   | 0.010 | 0.52     | 0.69             | -0.024  | 0.008 | 0.73     | 0.84             |
| GA at delivery                             | -0.158  | 0.001 | 0.06     | 0.40             | 0.132   | 0.001 | 0.09     | 0.54             | 0.016   | 0.002 | 0.85     | 0.85             | 0.170   | 0.001 | 0.02     | 0.22             |
| GA at T1                                   | -0.067  | 0.001 | 0.31     | 0.84             | -0.002  | 0.001 | 0.98     | 0.98             | -0.037  | 0.001 | 0.59     | 0.75             | 0.021   | 0.001 | 0.72     | 0.91             |
| PMA at scan                                | 0.399   | 0.001 | <0.001   | <b>&lt;0.001</b> | -0.569  | 0.001 | <0.001   | <b>&lt;0.001</b> | -0.303  | 0.002 | <0.001   | <b>&lt;0.001</b> | -0.608  | 0.001 | <0.001   | <b>&lt;0.001</b> |
| <b>Fornix</b>                              |         |       |          |                  |         |       |          |                  |         |       |          |                  |         |       |          |                  |
| TNF- $\alpha$ T1                           | -0.008  | 0.001 | 0.90     | 0.91             | -0.092  | 0.002 | 0.11     | 0.90             | -0.085  | 0.003 | 0.18     | 0.83             | -0.082  | 0.002 | 0.15     | 0.69             |
| Sex                                        | -0.090  | 0.002 | 0.19     | 0.34             | -0.015  | 0.003 | 0.79     | 0.92             | -0.048  | 0.005 | 0.45     | 0.55             | 0.013   | 0.003 | 0.83     | 0.99             |
| NICU stay                                  | 0.008   | 0.005 | 0.92     | 0.92             | 0.049   | 0.008 | 0.47     | 0.71             | 0.046   | 0.011 | 0.54     | 0.69             | 0.044   | 0.008 | 0.51     | 0.79             |
| GA at delivery                             | -0.076  | 0.001 | 0.37     | 0.56             | 0.084   | 0.001 | 0.25     | 0.72             | 0.044   | 0.002 | 0.58     | 0.85             | 0.100   | 0.001 | 0.16     | 0.73             |
| GA at T1                                   | -0.046  | 0.000 | 0.50     | 0.84             | 0.080   | 0.001 | 0.17     | 0.94             | 0.085   | 0.001 | 0.19     | 0.75             | 0.076   | 0.001 | 0.19     | 0.91             |
| PMA at scan                                | 0.327   | 0.001 | <0.001   | <b>&lt;0.001</b> | -0.610  | 0.001 | <0.001   | <b>&lt;0.001</b> | -0.464  | 0.002 | <0.001   | <b>&lt;0.001</b> | -0.625  | 0.001 | <0.001   | <b>&lt;0.001</b> |
| <b>TNF-<math>\alpha</math> Trimester 2</b> |         |       |          |                  |         |       |          |                  |         |       |          |                  |         |       |          |                  |
|                                            | $\beta$ | SE    | FA       |                  | $\beta$ | SE    | MD       |                  | $\beta$ | SE    | AD       |                  | $\beta$ | SE    | RD       |                  |
|                                            |         |       | <i>p</i> | <i>q</i>         |         |       | <i>p</i> | <i>q</i>         |         |       | <i>p</i> | <i>q</i>         |         |       | <i>p</i> | <i>q</i>         |
| <b>Corpus Callosum</b>                     |         |       |          |                  |         |       |          |                  |         |       |          |                  |         |       |          |                  |
| TNF- $\alpha$ T2                           | -0.102  | 0.002 | 0.09     | 0.17             | 0.060   | 0.002 | 0.30     | 0.81             | -0.046  | 0.002 | 0.51     | 0.77             | 0.086   | 0.003 | 0.13     | 0.39             |
| Sex                                        | -0.084  | 0.004 | 0.17     | 0.75             | -0.019  | 0.004 | 0.75     | 0.81             | -0.097  | 0.004 | 0.18     | 0.28             | 0.035   | 0.005 | 0.54     | 0.81             |
| NICU stay                                  | -0.079  | 0.009 | 0.28     | 0.51             | -0.030  | 0.010 | 0.69     | 0.85             | 0.031   | 0.010 | 0.73     | 0.99             | -0.006  | 0.013 | 0.93     | 0.99             |
| GA at delivery                             | 0.068   | 0.001 | 0.39     | 0.70             | -0.055  | 0.001 | 0.50     | 0.84             | 0.157   | 0.001 | 0.11     | 0.47             | -0.095  | 0.002 | 0.23     | 0.69             |
| GA at T2                                   | 0.017   | 0.001 | 0.78     | 0.88             | 0.007   | 0.001 | 0.91     | 0.91             | 0.037   | 0.001 | 0.61     | 0.69             | 0.010   | 0.001 | 0.87     | 0.98             |
| PMA at scan                                | 0.488   | 0.001 | <0.001   | <b>&lt;0.001</b> | -0.570  | 0.001 | <0.001   | <b>&lt;0.001</b> | -0.190  | 0.002 | 0.01     | <b>0.01</b>      | -0.565  | 0.002 | <0.001   | <b>&lt;0.001</b> |
| <b>Superior Cingulum Bundle</b>            |         |       |          |                  |         |       |          |                  |         |       |          |                  |         |       |          |                  |
| TNF- $\alpha$ T2                           | 0.015   | 0.002 | 0.82     | 0.92             | 0.030   | 0.003 | 0.63     | 0.81             | 0.051   | 0.003 | 0.45     | 0.77             | 0.020   | 0.003 | 0.75     | 0.75             |
| Sex                                        | -0.058  | 0.003 | 0.39     | 0.86             | -0.015  | 0.005 | 0.81     | 0.81             | -0.081  | 0.006 | 0.23     | 0.29             | 0.015   | 0.006 | 0.81     | 0.91             |
| NICU stay                                  | -0.014  | 0.008 | 0.87     | 0.96             | 0.077   | 0.012 | 0.32     | 0.70             | 0.062   | 0.014 | 0.46     | 0.99             | 0.068   | 0.014 | 0.38     | 0.69             |
| GA at delivery                             | 0.007   | 0.001 | 0.94     | 0.94             | 0.124   | 0.002 | 0.14     | 0.84             | 0.127   | 0.002 | 0.16     | 0.47             | 0.100   | 0.002 | 0.23     | 0.69             |
| GA at T2                                   | -0.067  | 0.000 | 0.32     | 0.82             | 0.069   | 0.001 | 0.27     | 0.49             | 0.049   | 0.001 | 0.47     | 0.61             | 0.066   | 0.001 | 0.29     | 0.88             |
| PMA at scan                                | 0.392   | 0.001 | <0.001   | <b>&lt;0.001</b> | -0.539  | 0.002 | <0.001   | <b>&lt;0.001</b> | -0.389  | 0.002 | <0.001   | <b>&lt;0.001</b> | -0.529  | 0.002 | <0.001   | <b>&lt;0.001</b> |
| <b>Corticospinal Tract</b>                 |         |       |          |                  |         |       |          |                  |         |       |          |                  |         |       |          |                  |
| TNF- $\alpha$ T2                           | -0.099  | 0.002 | 0.08     | 0.17             | 0.101   | 0.003 | 0.05     | 0.42             | 0.047   | 0.002 | 0.40     | 0.77             | 0.102   | 0.003 | 0.05     | 0.38             |
| Sex                                        | 0.033   | 0.004 | 0.57     | 0.86             | -0.047  | 0.005 | 0.36     | 0.65             | -0.047  | 0.004 | 0.40     | 0.40             | -0.043  | 0.006 | 0.42     | 0.76             |
| NICU stay                                  | -0.066  | 0.008 | 0.36     | 0.54             | 0.035   | 0.012 | 0.58     | 0.85             | 0.056   | 0.010 | 0.42     | 0.99             | 0.033   | 0.015 | 0.61     | 0.85             |
| GA at delivery                             | 0.041   | 0.001 | 0.59     | 0.74             | -0.031  | 0.002 | 0.66     | 0.84             | 0.032   | 0.001 | 0.67     | 0.68             | -0.019  | 0.002 | 0.78     | 0.89             |
| GA at T2                                   | 0.044   | 0.000 | 0.45     | 0.82             | 0.022   | 0.001 | 0.67     | 0.87             | 0.066   | 0.001 | 0.25     | 0.38             | 0.000   | 0.001 | 0.99     | 0.99             |

|                                             |        |       |        |                  |        |       |        |                  |        |       |        |                  |        |       |        |                  |
|---------------------------------------------|--------|-------|--------|------------------|--------|-------|--------|------------------|--------|-------|--------|------------------|--------|-------|--------|------------------|
| PMA at scan                                 | 0.552  | 0.001 | <0.001 | <b>&lt;0.001</b> | -0.686 | 0.002 | <0.001 | <b>&lt;0.001</b> | -0.631 | 0.001 | <0.001 | <b>&lt;0.001</b> | -0.669 | 0.002 | <0.001 | <b>&lt;0.001</b> |
| <b>Optic Radiation</b>                      |        |       |        |                  |        |       |        |                  |        |       |        |                  |        |       |        |                  |
| TNF-α T2                                    | -0.093 | 0.002 | 0.09   | 0.17             | 0.059  | 0.003 | 0.26   | 0.81             | 0.026  | 0.003 | 0.69   | 0.77             | 0.068  | 0.003 | 0.17   | 0.39             |
| Sex                                         | -0.017 | 0.004 | 0.76   | 0.86             | -0.138 | 0.006 | 0.01   | <b>0.04</b>      | -0.217 | 0.006 | <0.01  | <b>0.01</b>      | -0.100 | 0.006 | 0.05   | 0.22             |
| NICU stay                                   | -0.113 | 0.008 | 0.11   | 0.51             | 0.120  | 0.013 | 0.07   | 0.62             | 0.072  | 0.014 | 0.38   | 0.99             | 0.126  | 0.015 | 0.05   | 0.37             |
| GA at delivery                              | 0.034  | 0.001 | 0.65   | 0.74             | -0.069 | 0.002 | 0.33   | 0.84             | -0.036 | 0.002 | 0.68   | 0.68             | -0.069 | 0.002 | 0.31   | 0.69             |
| GA at T2                                    | 0.062  | 0.001 | 0.28   | 0.82             | 0.062  | 0.001 | 0.25   | 0.49             | 0.112  | 0.001 | 0.09   | 0.25             | 0.034  | 0.001 | 0.51   | 0.91             |
| PMA at scan                                 | 0.566  | 0.001 | <0.001 | <b>&lt;0.001</b> | -0.615 | 0.002 | <0.001 | <b>&lt;0.001</b> | -0.341 | 0.002 | <0.001 | <b>&lt;0.001</b> | -0.646 | 0.002 | <0.001 | <b>&lt;0.001</b> |
| <b>Uncinate Fasciculus</b>                  |        |       |        |                  |        |       |        |                  |        |       |        |                  |        |       |        |                  |
| TNF-α T2                                    | -0.146 | 0.002 | 0.01   | 0.05             | 0.009  | 0.003 | 0.88   | 0.88             | -0.098 | 0.003 | 0.15   | 0.77             | 0.048  | 0.003 | 0.40   | 0.71             |
| Sex                                         | -0.059 | 0.003 | 0.31   | 0.86             | -0.038 | 0.005 | 0.54   | 0.69             | -0.092 | 0.006 | 0.19   | 0.28             | -0.014 | 0.005 | 0.81   | 0.91             |
| NICU stay                                   | -0.029 | 0.007 | 0.69   | 0.89             | 0.024  | 0.012 | 0.76   | 0.85             | 0.001  | 0.014 | 0.99   | 0.99             | 0.032  | 0.013 | 0.66   | 0.85             |
| GA at delivery                              | 0.107  | 0.001 | 0.16   | 0.49             | 0.056  | 0.002 | 0.50   | 0.84             | 0.150  | 0.002 | 0.11   | 0.47             | 0.002  | 0.002 | 0.98   | 0.98             |
| GA at T2                                    | 0.031  | 0.000 | 0.59   | 0.88             | 0.072  | 0.001 | 0.26   | 0.49             | 0.105  | 0.001 | 0.14   | 0.25             | 0.044  | 0.001 | 0.46   | 0.91             |
| PMA at scan                                 | 0.532  | 0.001 | <0.001 | <b>&lt;0.001</b> | -0.533 | 0.002 | <0.001 | <b>&lt;0.001</b> | -0.220 | 0.002 | <0.001 | <b>&lt;0.001</b> | -0.596 | 0.002 | <0.001 | <b>&lt;0.001</b> |
| <b>Inferior Fronto-Occipital Fasciculus</b> |        |       |        |                  |        |       |        |                  |        |       |        |                  |        |       |        |                  |
| TNF-α T2                                    | -0.043 | 0.002 | 0.39   | 0.59             | 0.010  | 0.003 | 0.84   | 0.88             | -0.008 | 0.002 | 0.90   | 0.90             | 0.021  | 0.004 | 0.67   | 0.75             |
| Sex                                         | 0.002  | 0.004 | 0.97   | 0.97             | -0.104 | 0.006 | 0.05   | 0.16             | -0.183 | 0.004 | 0.01   | <b>0.02</b>      | -0.071 | 0.007 | 0.17   | 0.52             |
| NICU stay                                   | -0.074 | 0.008 | 0.25   | 0.51             | 0.078  | 0.013 | 0.24   | 0.70             | 0.040  | 0.010 | 0.62   | 0.99             | 0.082  | 0.017 | 0.21   | 0.62             |
| GA at delivery                              | 0.077  | 0.001 | 0.26   | 0.59             | -0.012 | 0.002 | 0.87   | 0.87             | 0.087  | 0.002 | 0.32   | 0.66             | -0.034 | 0.002 | 0.62   | 0.89             |
| GA at T2                                    | 0.039  | 0.001 | 0.45   | 0.82             | 0.040  | 0.001 | 0.47   | 0.70             | 0.129  | 0.001 | 0.05   | 0.25             | 0.015  | 0.001 | 0.78   | 0.98             |
| PMA at scan                                 | 0.645  | 0.001 | <0.001 | <b>&lt;0.001</b> | -0.650 | 0.002 | <0.001 | <b>&lt;0.001</b> | -0.413 | 0.002 | <0.001 | <b>&lt;0.001</b> | -0.664 | 0.003 | <0.001 | <b>&lt;0.001</b> |
| <b>Anterior Limb of Internal Capsule</b>    |        |       |        |                  |        |       |        |                  |        |       |        |                  |        |       |        |                  |
| TNF-α T2                                    | -0.003 | 0.002 | 0.96   | 0.96             | -0.032 | 0.004 | 0.57   | 0.81             | -0.045 | 0.003 | 0.49   | 0.77             | -0.026 | 0.004 | 0.63   | 0.75             |
| Sex                                         | 0.019  | 0.003 | 0.71   | 0.86             | -0.056 | 0.007 | 0.33   | 0.65             | -0.063 | 0.006 | 0.34   | 0.38             | -0.049 | 0.008 | 0.37   | 0.76             |
| NICU stay                                   | -0.084 | 0.007 | 0.19   | 0.51             | 0.062  | 0.016 | 0.39   | 0.70             | 0.025  | 0.014 | 0.76   | 0.99             | 0.070  | 0.018 | 0.30   | 0.69             |
| GA at delivery                              | 0.138  | 0.001 | 0.04   | 0.32             | -0.024 | 0.002 | 0.75   | 0.84             | 0.068  | 0.002 | 0.44   | 0.66             | -0.053 | 0.003 | 0.47   | 0.85             |
| GA at T2                                    | -0.039 | 0.000 | 0.45   | 0.82             | 0.090  | 0.001 | 0.12   | 0.49             | 0.117  | 0.001 | 0.08   | 0.25             | 0.078  | 0.001 | 0.16   | 0.72             |
| PMA at scan                                 | 0.627  | 0.001 | <0.001 | <b>&lt;0.001</b> | -0.591 | 0.002 | <0.001 | <b>&lt;0.001</b> | -0.429 | 0.002 | <0.001 | <b>&lt;0.001</b> | -0.619 | 0.003 | <0.001 | <b>&lt;0.001</b> |
| <b>Inferior Cingulum Bundle</b>             |        |       |        |                  |        |       |        |                  |        |       |        |                  |        |       |        |                  |
| TNF-α T2                                    | -0.183 | 0.001 | <0.01  | <b>0.04</b>      | 0.039  | 0.002 | 0.48   | 0.81             | -0.090 | 0.002 | 0.18   | 0.77             | 0.094  | 0.002 | 0.08   | 0.38             |
| Sex                                         | -0.042 | 0.003 | 0.51   | 0.86             | -0.189 | 0.003 | <0.01  | <b>0.01</b>      | -0.211 | 0.004 | <0.01  | <b>0.01</b>      | -0.152 | 0.003 | 0.01   | 0.06             |
| NICU stay                                   | -0.119 | 0.006 | 0.13   | 0.51             | 0.078  | 0.007 | 0.27   | 0.70             | -0.023 | 0.010 | 0.79   | 0.99             | 0.120  | 0.008 | 0.08   | 0.37             |
| GA at delivery                              | -0.154 | 0.001 | 0.07   | 0.32             | 0.091  | 0.001 | 0.23   | 0.84             | -0.042 | 0.001 | 0.64   | 0.68             | 0.145  | 0.001 | 0.05   | 0.45             |
| GA at T2                                    | -0.006 | 0.000 | 0.93   | 0.93             | 0.102  | 0.000 | 0.08   | 0.49             | 0.103  | 0.001 | 0.13   | 0.25             | 0.096  | 0.000 | 0.09   | 0.72             |
| PMA at scan                                 | 0.467  | 0.001 | <0.001 | <b>&lt;0.001</b> | -0.617 | 0.001 | <0.001 | <b>&lt;0.001</b> | -0.295 | 0.001 | <0.001 | <b>&lt;0.001</b> | -0.663 | 0.001 | <0.001 | <b>&lt;0.001</b> |
| <b>Fornix</b>                               |        |       |        |                  |        |       |        |                  |        |       |        |                  |        |       |        |                  |
| TNF-α T2                                    | -0.022 | 0.001 | 0.73   | 0.92             | -0.031 | 0.002 | 0.57   | 0.81             | -0.030 | 0.002 | 0.63   | 0.77             | -0.021 | 0.002 | 0.69   | 0.75             |
| Sex                                         | -0.106 | 0.002 | 0.11   | 0.75             | -0.036 | 0.003 | 0.52   | 0.69             | -0.084 | 0.004 | 0.19   | 0.28             | 0.000  | 0.003 | 0.99   | 0.99             |

|                |        |       |        |                  |        |       |        |                  |        |       |        |                  |        |       |        |                  |
|----------------|--------|-------|--------|------------------|--------|-------|--------|------------------|--------|-------|--------|------------------|--------|-------|--------|------------------|
| NICU stay      | 0.004  | 0.005 | 0.96   | 0.96             | -0.001 | 0.008 | 0.99   | 0.99             | -0.003 | 0.010 | 0.97   | 0.99             | 0.001  | 0.008 | 0.99   | 0.99             |
| GA at delivery | 0.039  | 0.001 | 0.66   | 0.74             | 0.039  | 0.001 | 0.60   | 0.84             | 0.072  | 0.002 | 0.40   | 0.66             | 0.020  | 0.001 | 0.79   | 0.89             |
| GA at T2       | -0.025 | 0.000 | 0.70   | 0.88             | 0.007  | 0.000 | 0.91   | 0.91             | -0.011 | 0.001 | 0.87   | 0.87             | 0.016  | 0.000 | 0.78   | 0.98             |
| PMA at scan    | 0.391  | 0.001 | <0.001 | <b>&lt;0.001</b> | -0.648 | 0.001 | <0.001 | <b>&lt;0.001</b> | -0.491 | 0.002 | <0.001 | <b>&lt;0.001</b> | -0.657 | 0.001 | <0.001 | <b>&lt;0.001</b> |

### TNF- $\alpha$ Trimester 3

|  | FA      |    |     |     | MD      |    |     |     | AD      |    |     |     | RD      |    |     |     |
|--|---------|----|-----|-----|---------|----|-----|-----|---------|----|-----|-----|---------|----|-----|-----|
|  | $\beta$ | SE | $p$ | $q$ | $\beta$ | SE | $p$ | $q$ | $\beta$ | SE | $p$ | $q$ | $\beta$ | SE | $p$ | $q$ |

| <b>Corpus Callosum</b> |        |       |        |                  |        |       |        |                  |        |       |      |             |        |       |        |                  |
|------------------------|--------|-------|--------|------------------|--------|-------|--------|------------------|--------|-------|------|-------------|--------|-------|--------|------------------|
| TNF- $\alpha$ T3       | 0.027  | 0.002 | 0.62   | 0.85             | -0.087 | 0.002 | 0.10   | 0.44             | -0.093 | 0.002 | 0.14 | 0.41        | -0.068 | 0.002 | 0.19   | 0.84             |
| Sex                    | -0.140 | 0.003 | 0.01   | 0.09             | 0.003  | 0.003 | 0.96   | 0.98             | -0.107 | 0.004 | 0.09 | 0.15        | 0.071  | 0.005 | 0.17   | 0.50             |
| NICU stay              | -0.046 | 0.009 | 0.45   | 0.55             | -0.025 | 0.009 | 0.68   | 0.94             | 0.009  | 0.009 | 0.90 | 0.90        | -0.004 | 0.012 | 0.94   | 0.94             |
| GA at delivery         | 0.003  | 0.001 | 0.97   | 0.97             | 0.004  | 0.001 | 0.95   | 0.99             | 0.087  | 0.002 | 0.28 | 0.58        | -0.019 | 0.002 | 0.78   | 0.86             |
| GA at T3               | 0.053  | 0.001 | 0.35   | 0.52             | -0.043 | 0.001 | 0.43   | 0.94             | 0.007  | 0.001 | 0.91 | 0.99        | -0.060 | 0.001 | 0.27   | 0.69             |
| PMA at scan            | 0.461  | 0.001 | <0.001 | <b>&lt;0.001</b> | -0.565 | 0.001 | <0.001 | <b>&lt;0.001</b> | -0.189 | 0.001 | 0.01 | <b>0.01</b> | -0.557 | 0.002 | <0.001 | <b>&lt;0.001</b> |

| <b>Superior Cingulum Bundle</b> |        |       |        |                  |        |       |        |                  |        |       |        |                  |        |       |        |                  |
|---------------------------------|--------|-------|--------|------------------|--------|-------|--------|------------------|--------|-------|--------|------------------|--------|-------|--------|------------------|
| TNF- $\alpha$ T3                | -0.016 | 0.002 | 0.79   | 0.85             | 0.010  | 0.002 | 0.85   | 0.95             | 0.007  | 0.003 | 0.90   | 0.93             | 0.011  | 0.003 | 0.85   | 0.96             |
| Sex                             | -0.083 | 0.003 | 0.16   | 0.41             | -0.023 | 0.005 | 0.67   | 0.86             | -0.100 | 0.005 | 0.08   | 0.15             | 0.017  | 0.005 | 0.76   | 0.85             |
| NICU stay                       | -0.069 | 0.008 | 0.32   | 0.55             | 0.017  | 0.012 | 0.79   | 0.94             | -0.038 | 0.014 | 0.58   | 0.78             | 0.040  | 0.014 | 0.54   | 0.94             |
| GA at delivery                  | 0.019  | 0.001 | 0.81   | 0.97             | 0.085  | 0.002 | 0.23   | 0.97             | 0.098  | 0.002 | 0.19   | 0.58             | 0.066  | 0.002 | 0.36   | 0.86             |
| GA at T3                        | -0.074 | 0.001 | 0.23   | 0.51             | 0.021  | 0.001 | 0.71   | 0.94             | -0.031 | 0.001 | 0.61   | 0.99             | 0.043  | 0.001 | 0.46   | 0.69             |
| PMA at scan                     | 0.314  | 0.001 | <0.001 | <b>&lt;0.001</b> | -0.519 | 0.002 | <0.001 | <b>&lt;0.001</b> | -0.406 | 0.002 | <0.001 | <b>&lt;0.001</b> | -0.493 | 0.002 | <0.001 | <b>&lt;0.001</b> |

| <b>Corticospinal Tract</b> |        |       |        |                  |        |       |        |                  |        |       |        |                  |        |       |        |                  |
|----------------------------|--------|-------|--------|------------------|--------|-------|--------|------------------|--------|-------|--------|------------------|--------|-------|--------|------------------|
| TNF- $\alpha$ T3           | -0.036 | 0.002 | 0.48   | 0.85             | -0.008 | 0.002 | 0.86   | 0.95             | -0.041 | 0.002 | 0.43   | 0.65             | 0.002  | 0.003 | 0.97   | 0.97             |
| Sex                        | -0.017 | 0.003 | 0.75   | 0.84             | -0.044 | 0.004 | 0.34   | 0.61             | -0.085 | 0.004 | 0.10   | 0.15             | -0.023 | 0.005 | 0.62   | 0.79             |
| NICU stay                  | -0.071 | 0.008 | 0.24   | 0.55             | 0.031  | 0.011 | 0.56   | 0.94             | -0.030 | 0.010 | 0.62   | 0.78             | 0.039  | 0.014 | 0.47   | 0.94             |
| GA at delivery             | -0.015 | 0.001 | 0.82   | 0.97             | 0.000  | 0.002 | 0.99   | 0.99             | -0.007 | 0.002 | 0.92   | 0.92             | 0.028  | 0.002 | 0.64   | 0.86             |
| GA at T3                   | 0.091  | 0.001 | 0.09   | 0.42             | -0.047 | 0.001 | 0.33   | 0.94             | 0.017  | 0.001 | 0.75   | 0.99             | -0.063 | 0.001 | 0.20   | 0.69             |
| PMA at scan                | 0.547  | 0.001 | <0.001 | <b>&lt;0.001</b> | -0.672 | 0.002 | <0.001 | <b>&lt;0.001</b> | -0.564 | 0.002 | <0.001 | <b>&lt;0.001</b> | -0.663 | 0.002 | <0.001 | <b>&lt;0.001</b> |

| <b>Optic Radiation</b> |        |       |        |                  |        |       |        |                  |        |       |        |                  |        |       |        |                  |
|------------------------|--------|-------|--------|------------------|--------|-------|--------|------------------|--------|-------|--------|------------------|--------|-------|--------|------------------|
| TNF- $\alpha$ T3       | -0.016 | 0.002 | 0.75   | 0.85             | -0.020 | 0.003 | 0.69   | 0.95             | -0.031 | 0.003 | 0.61   | 0.78             | -0.010 | 0.003 | 0.84   | 0.96             |
| Sex                    | -0.002 | 0.003 | 0.97   | 0.97             | -0.113 | 0.005 | 0.02   | 0.11             | -0.173 | 0.005 | <0.01  | <b>0.02</b>      | -0.083 | 0.006 | 0.09   | 0.39             |
| NICU stay              | -0.086 | 0.009 | 0.16   | 0.55             | 0.075  | 0.013 | 0.20   | 0.92             | 0.027  | 0.014 | 0.70   | 0.78             | 0.084  | 0.015 | 0.14   | 0.68             |
| GA at delivery         | -0.015 | 0.001 | 0.83   | 0.97             | -0.044 | 0.002 | 0.50   | 0.97             | -0.058 | 0.002 | 0.45   | 0.58             | -0.028 | 0.002 | 0.66   | 0.86             |
| GA at T3               | 0.035  | 0.001 | 0.52   | 0.59             | 0.013  | 0.001 | 0.81   | 0.94             | 0.056  | 0.001 | 0.37   | 0.99             | -0.004 | 0.001 | 0.94   | 0.97             |
| PMA at scan            | 0.543  | 0.001 | <0.001 | <b>&lt;0.001</b> | -0.563 | 0.002 | <0.001 | <b>&lt;0.001</b> | -0.271 | 0.002 | <0.001 | <b>&lt;0.001</b> | -0.604 | 0.002 | <0.001 | <b>&lt;0.001</b> |

| <b>Uncinate Fasciculus</b> |        |       |      |      |        |       |      |      |        |       |      |      |        |       |      |      |
|----------------------------|--------|-------|------|------|--------|-------|------|------|--------|-------|------|------|--------|-------|------|------|
| TNF- $\alpha$ T3           | -0.091 | 0.001 | 0.09 | 0.44 | -0.053 | 0.002 | 0.33 | 0.75 | -0.129 | 0.003 | 0.03 | 0.27 | -0.011 | 0.002 | 0.83 | 0.96 |
| Sex                        | -0.070 | 0.003 | 0.18 | 0.41 | -0.063 | 0.004 | 0.25 | 0.56 | -0.119 | 0.005 | 0.04 | 0.13 | -0.029 | 0.005 | 0.58 | 0.79 |
| NICU stay                  | -0.042 | 0.007 | 0.49 | 0.55 | -0.126 | 0.011 | 0.05 | 0.43 | -0.168 | 0.014 | 0.02 | 0.14 | -0.084 | 0.012 | 0.17 | 0.68 |

|                                             |        |       |        |                  |        |       |        |                  |        |       |        |                  |        |       |        |                  |
|---------------------------------------------|--------|-------|--------|------------------|--------|-------|--------|------------------|--------|-------|--------|------------------|--------|-------|--------|------------------|
| GA at delivery                              | 0.119  | 0.001 | 0.08   | 0.40             | 0.038  | 0.002 | 0.59   | 0.97             | 0.120  | 0.002 | 0.12   | 0.58             | -0.012 | 0.002 | 0.86   | 0.86             |
| GA at T3                                    | -0.013 | 0.000 | 0.82   | 0.82             | 0.002  | 0.001 | 0.98   | 0.98             | 0.001  | 0.001 | 0.99   | 0.99             | 0.002  | 0.001 | 0.97   | 0.97             |
| PMA at scan                                 | 0.460  | 0.001 | <0.001 | <b>&lt;0.001</b> | -0.510 | 0.002 | <0.001 | <0.001           | -0.247 | 0.002 | <0.001 | <b>&lt;0.001</b> | -0.562 | 0.002 | <0.001 | <b>&lt;0.001</b> |
| <b>Inferior Fronto-Occipital Fasciculus</b> |        |       |        |                  |        |       |        |                  |        |       |        |                  |        |       |        |                  |
| TNF- $\alpha$ T3                            | 0.031  | 0.002 | 0.52   | 0.85             | -0.039 | 0.002 | 0.42   | 0.75             | -0.005 | 0.002 | 0.93   | 0.93             | -0.041 | 0.003 | 0.38   | 0.86             |
| Sex                                         | -0.035 | 0.003 | 0.47   | 0.70             | -0.081 | 0.005 | 0.09   | 0.28             | -0.164 | 0.004 | <0.01  | <b>0.02</b>      | -0.044 | 0.006 | 0.34   | 0.77             |
| NICU stay                                   | -0.053 | 0.008 | 0.34   | 0.55             | -0.004 | 0.013 | 0.94   | 0.94             | -0.047 | 0.010 | 0.48   | 0.78             | 0.015  | 0.015 | 0.78   | 0.94             |
| GA at delivery                              | 0.074  | 0.001 | 0.24   | 0.65             | -0.027 | 0.002 | 0.67   | 0.97             | 0.059  | 0.002 | 0.43   | 0.58             | -0.043 | 0.002 | 0.49   | 0.86             |
| GA at T3                                    | 0.040  | 0.001 | 0.42   | 0.54             | -0.011 | 0.001 | 0.83   | 0.94             | 0.031  | 0.001 | 0.60   | 0.99             | -0.023 | 0.001 | 0.64   | 0.83             |
| PMA at scan                                 | 0.598  | 0.001 | <0.001 | <b>&lt;0.001</b> | -0.630 | 0.002 | <0.001 | <b>&lt;0.001</b> | -0.400 | 0.002 | <0.001 | <b>&lt;0.001</b> | -0.642 | 0.002 | <0.001 | <b>&lt;0.001</b> |
| <b>Anterior Limb of Internal Capsule</b>    |        |       |        |                  |        |       |        |                  |        |       |        |                  |        |       |        |                  |
| TNF- $\alpha$ T3                            | 0.009  | 0.001 | 0.85   | 0.85             | -0.058 | 0.003 | 0.25   | 0.75             | -0.070 | 0.003 | 0.22   | 0.49             | -0.051 | 0.003 | 0.30   | 0.86             |
| Sex                                         | -0.048 | 0.003 | 0.31   | 0.55             | -0.022 | 0.006 | 0.66   | 0.86             | -0.049 | 0.005 | 0.38   | 0.38             | -0.007 | 0.007 | 0.88   | 0.88             |
| NICU stay                                   | -0.027 | 0.007 | 0.62   | 0.62             | -0.031 | 0.015 | 0.60   | 0.94             | -0.074 | 0.013 | 0.27   | 0.78             | -0.014 | 0.017 | 0.80   | 0.94             |
| GA at delivery                              | 0.104  | 0.001 | 0.09   | 0.40             | -0.020 | 0.002 | 0.76   | 0.97             | 0.063  | 0.002 | 0.39   | 0.58             | -0.042 | 0.003 | 0.50   | 0.86             |
| GA at T3                                    | 0.058  | 0.000 | 0.24   | 0.51             | -0.030 | 0.001 | 0.56   | 0.94             | -0.001 | 0.001 | 0.98   | 0.99             | -0.038 | 0.001 | 0.45   | 0.69             |
| PMA at scan                                 | 0.596  | 0.001 | <0.001 | <b>&lt;0.001</b> | -0.597 | 0.002 | <0.001 | <b>&lt;0.001</b> | -0.454 | 0.002 | <0.001 | <b>&lt;0.001</b> | -0.618 | 0.003 | <0.001 | <b>&lt;0.001</b> |
| <b>Inferior Cingulum Bundle</b>             |        |       |        |                  |        |       |        |                  |        |       |        |                  |        |       |        |                  |
| TNF- $\alpha$ T3                            | -0.096 | 0.001 | 0.10   | 0.44             | 0.003  | 0.001 | 0.95   | 0.95             | -0.061 | 0.002 | 0.30   | 0.55             | 0.029  | 0.002 | 0.57   | 0.96             |
| Sex                                         | 0.029  | 0.002 | 0.62   | 0.79             | -0.121 | 0.003 | 0.02   | 0.11             | -0.085 | 0.004 | 0.15   | 0.19             | -0.116 | 0.003 | 0.02   | 0.20             |
| NICU stay                                   | -0.131 | 0.006 | 0.05   | 0.48             | 0.010  | 0.007 | 0.87   | 0.94             | -0.078 | 0.009 | 0.26   | 0.78             | 0.072  | 0.008 | 0.23   | 0.94             |
| GA at delivery                              | -0.080 | 0.001 | 0.29   | 0.65             | 0.128  | 0.001 | 0.06   | 0.52             | 0.063  | 0.002 | 0.42   | 0.58             | 0.144  | 0.001 | 0.03   | 0.28             |
| GA at T3                                    | -0.065 | 0.000 | 0.29   | 0.51             | 0.016  | 0.001 | 0.77   | 0.94             | -0.031 | 0.001 | 0.62   | 0.99             | 0.041  | 0.001 | 0.44   | 0.69             |
| PMA at scan                                 | 0.382  | 0.001 | <0.001 | <b>&lt;0.001</b> | -0.608 | 0.001 | <0.001 | <b>&lt;0.001</b> | -0.338 | 0.001 | <0.001 | <b>&lt;0.001</b> | -0.623 | 0.001 | <0.001 | <b>&lt;0.001</b> |
| <b>Fornix</b>                               |        |       |        |                  |        |       |        |                  |        |       |        |                  |        |       |        |                  |
| TNF- $\alpha$ T3                            | -0.012 | 0.001 | 0.83   | 0.85             | -0.091 | 0.002 | 0.07   | 0.44             | -0.105 | 0.002 | 0.06   | 0.27             | -0.068 | 0.002 | 0.17   | 0.84             |
| Sex                                         | -0.112 | 0.002 | 0.05   | 0.25             | -0.001 | 0.003 | 0.98   | 0.98             | -0.056 | 0.004 | 0.31   | 0.35             | 0.034  | 0.003 | 0.49   | 0.79             |
| NICU stay                                   | -0.054 | 0.005 | 0.43   | 0.55             | -0.012 | 0.008 | 0.83   | 0.94             | -0.045 | 0.010 | 0.48   | 0.78             | 0.009  | 0.008 | 0.88   | 0.94             |
| GA at delivery                              | 0.013  | 0.001 | 0.86   | 0.97             | 0.022  | 0.001 | 0.73   | 0.97             | 0.036  | 0.002 | 0.62   | 0.69             | 0.015  | 0.001 | 0.81   | 0.86             |
| GA at T3                                    | -0.105 | 0.000 | 0.08   | 0.42             | 0.051  | 0.001 | 0.33   | 0.94             | -0.015 | 0.001 | 0.80   | 0.99             | 0.079  | 0.001 | 0.13   | 0.69             |
| PMA at scan                                 | 0.346  | 0.001 | <0.001 | <b>&lt;0.001</b> | -0.623 | 0.001 | <0.001 | <b>&lt;0.001</b> | -0.475 | 0.002 | <0.001 | <b>&lt;0.001</b> | -0.632 | 0.001 | <0.001 | <b>&lt;0.001</b> |

Bolded values represent statistical significance after FDR correction for multiple comparisons.  $\beta$ , standardized beta coefficient; SE, standard error;  $q$ , FDR-corrected p-value; FA, fractional anisotropy; MD, mean diffusivity; AD, axial diffusivity; RD, radial diffusivity; IL, interleukin; TNF- $\alpha$ , tumor necrosis factor alpha; GA, gestational age; PMA, infant postmenstrual age; Sex, child sex; T, trimester.

We investigated the moderating role of family socioeconomic group in the relationship between maternal cytokine concentrations by trimester and neonatal dMRI parameters. As shown in Table S3, family SES moderated the relationship between maternal IL-6 at trimester 3 and CC FA ( $\beta = -0.14$ ;  $q = 0.01$ ). Additionally, family SES moderated the relationship between maternal TNF- $\alpha$  at trimester 1 and 1) CC FA ( $\beta = -0.21$ ;  $q = 0.01$ ), MD ( $\beta = 0.19$ ;  $q = 0.03$ ), and RD ( $\beta = 0.20$ ;  $q = 0.03$ ); 2) CB MD ( $\beta = 0.26$ ;  $q = 0.01$ ) and RD ( $\beta = 0.24$ ;  $q = 0.03$ ); 3) CST ( $\beta = 0.16$ ;  $q = 0.04$ ); 4) IFOF MD ( $\beta = 0.18$ ;  $q = 0.03$ ); ALIC MD ( $\beta = 0.24$ ;  $q = 0.01$ ), AD ( $\beta = 0.25$ ;  $q = 0.04$ ), and RD ( $\beta = 0.22$ ;  $q = 0.02$ ); and 4) CBIF MD ( $\beta = 0.21$ ;  $q = 0.03$ ). Lastly, family SES moderated the relationship between maternal TNF- $\alpha$  at trimester 3 and CB AD ( $\beta = 0.21$ ;  $q = 0.02$ ) and CBIF AD ( $\beta = 0.26$ ;  $q < 0.01$ ).

**Table S5.**

| IL-6 Trimester 1                |         |       |        |                  |         |       |        |                  |         |       |        |                  |         |       |        |                  |
|---------------------------------|---------|-------|--------|------------------|---------|-------|--------|------------------|---------|-------|--------|------------------|---------|-------|--------|------------------|
|                                 | FA      |       |        |                  | MD      |       |        |                  | AD      |       |        |                  | RD      |       |        |                  |
|                                 | $\beta$ | SE    | $p$    | $q$              | $\beta$ | SE    | $p$    | $q$              | $\beta$ | SE    | $p$    | $q$              | $\beta$ | SE    | $p$    | $q$              |
| <b>Corpus Callosum</b>          |         |       |        |                  |         |       |        |                  |         |       |        |                  |         |       |        |                  |
| IL-6 T1                         | 0.018   | 0.002 | 0.82   | 0.99             | -0.033  | 0.002 | 0.69   | 0.88             | -0.046  | 0.003 | 0.62   | 0.71             | -0.038  | 0.003 | 0.63   | 0.81             |
| SES group                       | 0.128   | 0.004 | 0.05   | 0.22             | -0.009  | 0.004 | 0.88   | 0.88             | 0.193   | 0.005 | 0.01   | <b>0.02</b>      | -0.082  | 0.005 | 0.19   | 0.21             |
| Sex                             | -0.141  | 0.004 | 0.03   | 0.17             | 0.066   | 0.004 | 0.29   | 0.80             | -0.088  | 0.004 | 0.22   | 0.40             | 0.113   | 0.005 | 0.06   | 0.56             |
| NICU stay                       | 0.017   | 0.009 | 0.82   | 0.94             | -0.071  | 0.009 | 0.32   | 1.00             | 0.060   | 0.010 | 0.46   | 0.96             | -0.080  | 0.012 | 0.25   | 0.88             |
| GA at delivery                  | -0.048  | 0.002 | 0.54   | 0.61             | 0.046   | 0.002 | 0.55   | 0.80             | -0.049  | 0.002 | 0.58   | 0.93             | 0.044   | 0.002 | 0.56   | 0.83             |
| GA at T1                        | -0.074  | 0.001 | 0.24   | 0.70             | 0.094   | 0.001 | 0.13   | 0.95             | 0.026   | 0.001 | 0.72   | 0.78             | 0.096   | 0.001 | 0.11   | 0.85             |
| PMA at scan                     | 0.455   | 0.002 | <0.001 | <b>&lt;0.001</b> | -0.540  | 0.001 | <0.001 | <b>&lt;0.001</b> | -0.105  | 0.002 | <0.001 | <b>&lt;0.001</b> | -0.534  | 0.002 | <0.001 | <b>&lt;0.001</b> |
| IL-6 T1:SES group               | -0.079  | 0.004 | 0.34   | 0.86             | 0.110   | 0.004 | 0.17   | 0.38             | 0.066   | 0.004 | 0.49   | 0.73             | 0.110   | 0.005 | 0.16   | 0.51             |
| <b>Superior Cingulum Bundle</b> |         |       |        |                  |         |       |        |                  |         |       |        |                  |         |       |        |                  |
| IL-6 T1                         | 0.008   | 0.002 | 0.93   | 0.99             | -0.074  | 0.003 | 0.37   | 0.78             | -0.033  | 0.004 | 0.71   | 0.71             | -0.083  | 0.004 | 0.31   | 0.81             |
| SES group                       | -0.147  | 0.004 | 0.04   | 0.22             | 0.181   | 0.006 | 0.01   | <b>0.01</b>      | 0.083   | 0.007 | 0.24   | 0.24             | 0.195   | 0.006 | <0.01  | <b>0.01</b>      |
| Sex                             | -0.109  | 0.003 | 0.11   | 0.34             | -0.033  | 0.005 | 0.60   | 0.85             | -0.126  | 0.006 | 0.07   | 0.15             | 0.010   | 0.006 | 0.88   | 1.00             |
| NICU stay                       | 0.028   | 0.008 | 0.72   | 0.94             | 0.026   | 0.012 | 0.72   | 1.00             | 0.040   | 0.014 | 0.61   | 0.96             | 0.011   | 0.014 | 0.88   | 0.88             |
| GA at delivery                  | 0.148   | 0.001 | 0.08   | 0.28             | -0.043  | 0.002 | 0.58   | 0.80             | 0.060   | 0.003 | 0.48   | 0.93             | -0.091  | 0.002 | 0.25   | 0.83             |
| GA at T1                        | -0.020  | 0.001 | 0.76   | 0.85             | -0.022  | 0.001 | 0.73   | 0.95             | -0.051  | 0.001 | 0.46   | 0.78             | -0.010  | 0.001 | 0.87   | 0.97             |
| PMA at scan                     | 0.292   | 0.001 | <0.001 | <b>&lt;0.001</b> | -0.490  | 0.002 | <0.001 | <b>&lt;0.001</b> | -0.387  | 0.002 | <0.001 | <b>&lt;0.001</b> | -0.465  | 0.002 | <0.001 | <b>&lt;0.001</b> |
| IL-6 T1:SES group               | -0.008  | 0.003 | 0.93   | 0.93             | 0.134   | 0.005 | 0.10   | 0.38             | 0.114   | 0.006 | 0.20   | 0.68             | 0.123   | 0.006 | 0.13   | 0.51             |
| <b>Corticospinal Tract</b>      |         |       |        |                  |         |       |        |                  |         |       |        |                  |         |       |        |                  |
| IL-6 T1                         | 0.022   | 0.002 | 0.79   | 0.99             | -0.084  | 0.003 | 0.24   | 0.78             | -0.095  | 0.003 | 0.21   | 0.71             | -0.074  | 0.004 | 0.31   | 0.81             |
| SES group                       | 0.069   | 0.004 | 0.28   | 0.80             | 0.117   | 0.005 | 0.04   | <b>0.04</b>      | 0.255   | 0.004 | <0.001 | <b>&lt;0.001</b> | 0.060   | 0.006 | 0.30   | 0.30             |
| Sex                             | -0.081  | 0.003 | 0.20   | 0.37             | 0.020   | 0.005 | 0.71   | 0.85             | -0.031  | 0.004 | 0.59   | 0.63             | 0.038   | 0.006 | 0.50   | 1.00             |
| NICU stay                       | 0.101   | 0.008 | 0.16   | 0.94             | 0.000   | 0.011 | 1.00   | 1.00             | 0.075   | 0.009 | 0.26   | 0.96             | -0.026  | 0.013 | 0.69   | 0.88             |
| GA at delivery                  | -0.030  | 0.001 | 0.70   | 0.70             | 0.015   | 0.002 | 0.83   | 0.83             | -0.007  | 0.002 | 0.93   | 0.93             | 0.020   | 0.002 | 0.78   | 0.88             |
| GA at T1                        | 0.024   | 0.001 | 0.71   | 0.85             | 0.011   | 0.001 | 0.84   | 0.95             | 0.045   | 0.001 | 0.44   | 0.78             | -0.002  | 0.001 | 0.97   | 0.97             |
| PMA at scan                     | 0.516   | 0.001 | <0.001 | <b>&lt;0.001</b> | -0.675  | 0.002 | <0.001 | <b>&lt;0.001</b> | -0.573  | 0.002 | <0.001 | <b>&lt;0.001</b> | -0.657  | 0.002 | <0.001 | <b>&lt;0.001</b> |
| IL-6 T1:SES group               | -0.071  | 0.003 | 0.38   | 0.86             | 0.100   | 0.005 | 0.16   | 0.38             | 0.076   | 0.004 | 0.32   | 0.68             | 0.101   | 0.006 | 0.17   | 0.51             |
| <b>Optic Radiation</b>          |         |       |        |                  |         |       |        |                  |         |       |        |                  |         |       |        |                  |
| IL-6 T1                         | -0.013  | 0.002 | 0.87   | 0.99             | -0.056  | 0.004 | 0.47   | 0.78             | -0.044  | 0.004 | 0.61   | 0.71             | -0.038  | 0.004 | 0.62   | 0.81             |
| SES group                       | 0.056   | 0.004 | 0.37   | 0.80             | 0.181   | 0.006 | <0.01  | <b>0.01</b>      | 0.294   | 0.006 | <0.001 | <b>&lt;0.001</b> | 0.127   | 0.007 | 0.04   | 0.06             |



|                                             |        |       |        |                  |        |       |        |                  |        |       |        |                  |        |       |        |                  |
|---------------------------------------------|--------|-------|--------|------------------|--------|-------|--------|------------------|--------|-------|--------|------------------|--------|-------|--------|------------------|
| Sex                                         | -0.078 | 0.004 | 0.21   | 0.37             | -0.070 | 0.006 | 0.24   | 0.80             | -0.175 | 0.006 | 0.01   | 0.06             | -0.031 | 0.007 | 0.60   | 1.00             |
| NICU stay                                   | -0.087 | 0.008 | 0.22   | 0.94             | 0.035  | 0.014 | 0.62   | 1.00             | -0.004 | 0.014 | 0.96   | 0.96             | 0.050  | 0.016 | 0.46   | 0.88             |
| GA at delivery                              | -0.107 | 0.001 | 0.16   | 0.30             | -0.037 | 0.002 | 0.62   | 0.80             | -0.119 | 0.002 | 0.15   | 0.68             | -0.002 | 0.003 | 0.98   | 0.98             |
| GA at T1                                    | -0.012 | 0.001 | 0.85   | 0.85             | 0.001  | 0.001 | 0.98   | 0.98             | 0.019  | 0.001 | 0.78   | 0.78             | 0.008  | 0.002 | 0.89   | 0.97             |
| PMA at scan                                 | 0.553  | 0.001 | <0.001 | <b>&lt;0.001</b> | -0.561 | 0.002 | <0.001 | <b>&lt;0.001</b> | -0.303 | 0.002 | <0.001 | <b>&lt;0.001</b> | -0.602 | 0.003 | <0.001 | <b>&lt;0.001</b> |
| IL-6 T1:SES group                           | 0.039  | 0.003 | 0.62   | 0.93             | -0.015 | 0.006 | 0.85   | 0.85             | -0.010 | 0.006 | 0.91   | 0.91             | -0.027 | 0.007 | 0.73   | 0.97             |
| <b>Uncinate Fasciculus</b>                  |        |       |        |                  |        |       |        |                  |        |       |        |                  |        |       |        |                  |
| IL-6 T1                                     | -0.076 | 0.002 | 0.35   | 0.99             | -0.020 | 0.003 | 0.81   | 0.91             | -0.089 | 0.004 | 0.33   | 0.71             | 0.010  | 0.003 | 0.89   | 0.89             |
| SES group                                   | -0.024 | 0.003 | 0.71   | 0.91             | 0.155  | 0.005 | 0.02   | <b>0.03</b>      | 0.160  | 0.006 | 0.03   | <b>0.03</b>      | 0.127  | 0.006 | 0.04   | 0.06             |
| Sex                                         | -0.129 | 0.003 | 0.04   | 0.17             | -0.057 | 0.005 | 0.36   | 0.80             | -0.159 | 0.006 | 0.02   | 0.07             | -0.006 | 0.006 | 0.93   | 1.00             |
| NICU stay                                   | 0.005  | 0.007 | 0.94   | 0.94             | 0.005  | 0.012 | 0.94   | 1.00             | -0.009 | 0.014 | 0.91   | 0.96             | 0.012  | 0.013 | 0.86   | 0.88             |
| GA at delivery                              | 0.106  | 0.001 | 0.17   | 0.30             | 0.089  | 0.002 | 0.25   | 0.80             | 0.173  | 0.002 | 0.05   | 0.41             | 0.033  | 0.002 | 0.66   | 0.84             |
| GA at T1                                    | -0.107 | 0.001 | 0.08   | 0.70             | 0.024  | 0.001 | 0.70   | 0.98             | -0.044 | 0.001 | 0.52   | 0.78             | 0.043  | 0.001 | 0.47   | 0.85             |
| PMA at scan                                 | 0.451  | 0.001 | <0.001 | <b>&lt;0.001</b> | -0.576 | 0.002 | <0.001 | <b>&lt;0.001</b> | -0.318 | 0.002 | <0.001 | <b>&lt;0.001</b> | -0.610 | 0.002 | <0.001 | <b>&lt;0.001</b> |
| IL-6 T1:SES group                           | -0.011 | 0.003 | 0.89   | 0.93             | 0.034  | 0.005 | 0.67   | 0.85             | 0.041  | 0.006 | 0.65   | 0.79             | 0.028  | 0.005 | 0.72   | 0.97             |
| <b>Inferior Fronto-Occipital Fasciculus</b> |        |       |        |                  |        |       |        |                  |        |       |        |                  |        |       |        |                  |
| IL-6 T1                                     | 0.014  | 0.002 | 0.85   | 0.99             | -0.046 | 0.003 | 0.52   | 0.78             | -0.062 | 0.003 | 0.46   | 0.71             | -0.036 | 0.004 | 0.61   | 0.81             |
| SES group                                   | 0.000  | 0.004 | 1.00   | 1.00             | 0.165  | 0.006 | <0.01  | <b>0.01</b>      | 0.307  | 0.004 | <0.001 | <b>&lt;0.001</b> | 0.118  | 0.007 | 0.04   | 0.06             |
| Sex                                         | -0.028 | 0.004 | 0.62   | 0.70             | -0.083 | 0.005 | 0.13   | 0.80             | -0.158 | 0.004 | 0.01   | 0.06             | -0.049 | 0.007 | 0.37   | 1.00             |
| NICU stay                                   | -0.008 | 0.008 | 0.90   | 0.94             | 0.028  | 0.012 | 0.66   | 1.00             | 0.043  | 0.010 | 0.56   | 0.96             | 0.021  | 0.016 | 0.73   | 0.88             |
| GA at delivery                              | 0.061  | 0.001 | 0.39   | 0.50             | -0.053 | 0.002 | 0.43   | 0.80             | -0.010 | 0.002 | 0.90   | 0.93             | -0.059 | 0.003 | 0.38   | 0.83             |
| GA at T1                                    | -0.059 | 0.001 | 0.30   | 0.70             | 0.023  | 0.001 | 0.67   | 0.95             | -0.022 | 0.001 | 0.72   | 0.78             | 0.043  | 0.002 | 0.42   | 0.85             |
| PMA at scan                                 | 0.604  | 0.001 | <0.001 | <b>&lt;0.001</b> | -0.653 | 0.002 | <0.001 | <b>&lt;0.001</b> | -0.442 | 0.002 | <0.001 | <b>&lt;0.001</b> | -0.657 | 0.003 | <0.001 | <b>&lt;0.001</b> |
| IL-6 T1:SES group                           | 0.039  | 0.004 | 0.60   | 0.93             | 0.019  | 0.005 | 0.79   | 0.85             | 0.087  | 0.004 | 0.29   | 0.68             | 0.000  | 0.007 | 1.00   | 1.00             |
| <b>Anterior Limb of Internal Capsule</b>    |        |       |        |                  |        |       |        |                  |        |       |        |                  |        |       |        |                  |
| IL-6 T1                                     | -0.001 | 0.002 | 0.99   | 0.99             | -0.071 | 0.004 | 0.36   | 0.78             | -0.090 | 0.004 | 0.30   | 0.71             | -0.061 | 0.005 | 0.42   | 0.81             |
| SES group                                   | 0.001  | 0.003 | 0.98   | 1.00             | 0.132  | 0.007 | 0.03   | <b>0.04</b>      | 0.189  | 0.006 | 0.01   | <b>0.01</b>      | 0.105  | 0.008 | 0.08   | 0.10             |
| Sex                                         | -0.041 | 0.003 | 0.46   | 0.59             | -0.011 | 0.007 | 0.85   | 0.85             | -0.034 | 0.006 | 0.61   | 0.63             | 0.000  | 0.008 | 1.00   | 1.00             |
| NICU stay                                   | 0.018  | 0.007 | 0.79   | 0.94             | 0.033  | 0.015 | 0.63   | 1.00             | 0.055  | 0.013 | 0.47   | 0.96             | 0.024  | 0.017 | 0.71   | 0.88             |
| GA at delivery                              | 0.118  | 0.001 | 0.09   | 0.28             | -0.042 | 0.003 | 0.57   | 0.80             | 0.024  | 0.002 | 0.77   | 0.93             | -0.061 | 0.003 | 0.39   | 0.83             |
| GA at T1                                    | -0.041 | 0.001 | 0.47   | 0.70             | 0.040  | 0.002 | 0.50   | 0.95             | 0.026  | 0.001 | 0.70   | 0.78             | 0.042  | 0.002 | 0.46   | 0.85             |
| PMA at scan                                 | 0.588  | 0.001 | <0.001 | <b>&lt;0.001</b> | -0.576 | 0.003 | <0.001 | <b>&lt;0.001</b> | -0.404 | 0.002 | <0.001 | <b>&lt;0.001</b> | -0.604 | 0.003 | <0.001 | <b>&lt;0.001</b> |
| IL-6 T1:SES group                           | 0.072  | 0.003 | 0.33   | 0.86             | 0.021  | 0.007 | 0.79   | 0.85             | 0.077  | 0.006 | 0.38   | 0.68             | 0.001  | 0.007 | 0.99   | 1.00             |
| <b>Inferior Cingulum Bundle</b>             |        |       |        |                  |        |       |        |                  |        |       |        |                  |        |       |        |                  |
| IL-6 T1                                     | -0.045 | 0.002 | 0.61   | 0.99             | -0.002 | 0.002 | 0.98   | 0.98             | -0.034 | 0.003 | 0.71   | 0.71             | 0.019  | 0.002 | 0.81   | 0.89             |
| SES group                                   | -0.039 | 0.003 | 0.58   | 0.86             | 0.214  | 0.003 | <0.01  | <b>0.01</b>      | 0.179  | 0.004 | 0.01   | <b>0.02</b>      | 0.192  | 0.004 | <0.01  | <b>0.01</b>      |
| Sex                                         | -0.008 | 0.003 | 0.90   | 0.90             | -0.047 | 0.003 | 0.44   | 0.80             | -0.047 | 0.004 | 0.50   | 0.63             | -0.036 | 0.003 | 0.55   | 1.00             |
| NICU stay                                   | 0.056  | 0.006 | 0.47   | 0.94             | -0.026 | 0.007 | 0.71   | 1.00             | 0.005  | 0.010 | 0.95   | 0.96             | -0.037 | 0.008 | 0.59   | 0.88             |
| GA at delivery                              | -0.160 | 0.001 | 0.06   | 0.28             | 0.067  | 0.001 | 0.38   | 0.80             | -0.048 | 0.002 | 0.58   | 0.93             | 0.115  | 0.001 | 0.12   | 0.83             |
| GA at T1                                    | -0.069 | 0.001 | 0.31   | 0.70             | -0.017 | 0.001 | 0.79   | 0.95             | -0.054 | 0.001 | 0.43   | 0.78             | 0.010  | 0.001 | 0.86   | 0.97             |
| PMA at scan                                 | 0.415  | 0.001 | <0.001 | <b>&lt;0.001</b> | -0.594 | 0.001 | <0.001 | <b>&lt;0.001</b> | -0.317 | 0.002 | <0.001 | <b>&lt;0.001</b> | -0.631 | 0.001 | <0.001 | <b>&lt;0.001</b> |
| IL-6 T1:SES group                           | -0.014 | 0.002 | 0.87   | 0.93             | 0.033  | 0.003 | 0.68   | 0.85             | 0.034  | 0.004 | 0.70   | 0.79             | 0.024  | 0.003 | 0.75   | 0.97             |
| <b>Fornix</b>                               |        |       |        |                  |        |       |        |                  |        |       |        |                  |        |       |        |                  |

|                   |        |       |        |                  |        |       |        |                  |        |       |        |                  |        |       |        |                  |
|-------------------|--------|-------|--------|------------------|--------|-------|--------|------------------|--------|-------|--------|------------------|--------|-------|--------|------------------|
| IL-6 T1           | -0.039 | 0.001 | 0.67   | 0.99             | -0.147 | 0.002 | 0.06   | 0.50             | -0.170 | 0.003 | 0.04   | 0.40             | -0.115 | 0.002 | 0.13   | 0.81             |
| SES group         | -0.055 | 0.002 | 0.44   | 0.80             | 0.137  | 0.004 | 0.02   | <b>0.03</b>      | 0.132  | 0.005 | 0.05   | 0.05             | 0.129  | 0.004 | 0.03   | 0.06             |
| Sex               | -0.068 | 0.002 | 0.33   | 0.50             | -0.012 | 0.003 | 0.84   | 0.85             | -0.031 | 0.005 | 0.63   | 0.63             | 0.006  | 0.003 | 0.91   | 1.00             |
| NICU stay         | 0.019  | 0.005 | 0.81   | 0.94             | 0.017  | 0.008 | 0.80   | 1.00             | 0.022  | 0.010 | 0.77   | 0.96             | 0.012  | 0.008 | 0.86   | 0.88             |
| GA at delivery    | -0.087 | 0.001 | 0.32   | 0.47             | 0.018  | 0.001 | 0.81   | 0.83             | -0.036 | 0.002 | 0.65   | 0.93             | 0.050  | 0.001 | 0.49   | 0.83             |
| GA at T1          | -0.057 | 0.000 | 0.41   | 0.70             | 0.064  | 0.001 | 0.27   | 0.95             | 0.058  | 0.001 | 0.36   | 0.78             | 0.067  | 0.001 | 0.25   | 0.85             |
| PMA at scan       | 0.356  | 0.001 | <0.001 | <b>&lt;0.001</b> | -0.606 | 0.001 | <0.001 | <b>&lt;0.001</b> | -0.453 | 0.002 | <0.001 | <b>&lt;0.001</b> | -0.628 | 0.001 | <0.001 | <b>&lt;0.001</b> |
| IL-6 T1:SES group | 0.092  | 0.002 | 0.31   | 0.86             | 0.119  | 0.003 | 0.12   | 0.38             | 0.181  | 0.004 | 0.03   | 0.28             | 0.070  | 0.003 | 0.36   | 0.80             |

### IL-6 Trimester 2

|                                 | FA      |       |        |                  | MD      |       |        |                  | AD      |       |        |                  | RD      |       |        |                  |
|---------------------------------|---------|-------|--------|------------------|---------|-------|--------|------------------|---------|-------|--------|------------------|---------|-------|--------|------------------|
|                                 | $\beta$ | SE    | $p$    | $q$              | $\beta$ | SE    | $p$    | $q$              | $\beta$ | SE    | $p$    | $q$              | $\beta$ | SE    | $p$    | $q$              |
| <b>Corpus Callosum</b>          |         |       |        |                  |         |       |        |                  |         |       |        |                  |         |       |        |                  |
| IL-6 T2                         | -0.008  | 0.002 | 0.91   | 1.00             | -0.002  | 0.002 | 0.98   | 0.99             | -0.043  | 0.003 | 0.61   | 0.69             | 0.007   | 0.003 | 0.92   | 0.98             |
| SES group                       | -0.041  | 0.004 | 0.53   | 0.70             | 0.026   | 0.004 | 0.69   | 0.69             | 0.041   | 0.005 | 0.60   | 0.81             | 0.030   | 0.006 | 0.63   | 0.71             |
| Sex                             | -0.071  | 0.004 | 0.24   | 0.79             | -0.027  | 0.004 | 0.65   | 0.73             | -0.090  | 0.004 | 0.20   | 0.33             | 0.024   | 0.005 | 0.68   | 0.89             |
| NICU stay                       | -0.067  | 0.009 | 0.36   | 0.75             | -0.036  | 0.009 | 0.63   | 0.91             | 0.033   | 0.010 | 0.72   | 0.96             | -0.015  | 0.013 | 0.83   | 0.94             |
| GA at delivery                  | 0.066   | 0.001 | 0.41   | 0.59             | -0.055  | 0.001 | 0.50   | 0.75             | 0.145   | 0.001 | 0.14   | 0.42             | -0.096  | 0.002 | 0.23   | 0.68             |
| GA at T2                        | 0.038   | 0.001 | 0.54   | 0.86             | 0.006   | 0.001 | 0.92   | 0.95             | 0.057   | 0.001 | 0.44   | 0.65             | 0.001   | 0.001 | 0.99   | 0.99             |
| PMA at scan                     | 0.458   | 0.001 | <0.001 | <b>&lt;0.001</b> | -0.564  | 0.001 | <0.001 | <b>&lt;0.001</b> | -0.223  | 0.002 | <0.001 | <b>&lt;0.001</b> | -0.548  | 0.002 | <0.001 | <b>&lt;0.001</b> |
| IL-6 T2:SES group               | -0.207  | 0.004 | 0.01   | 0.06             | 0.106   | 0.004 | 0.15   | 0.71             | -0.092  | 0.005 | 0.30   | 0.90             | 0.151   | 0.006 | 0.04   | 0.33             |
| <b>Superior Cingulum Bundle</b> |         |       |        |                  |         |       |        |                  |         |       |        |                  |         |       |        |                  |
| IL-6 T2                         | 0.073   | 0.002 | 0.36   | 0.59             | -0.115  | 0.003 | 0.13   | 0.58             | -0.046  | 0.004 | 0.58   | 0.69             | -0.127  | 0.004 | 0.09   | 0.41             |
| SES group                       | -0.185  | 0.004 | 0.01   | 0.05             | 0.114   | 0.006 | 0.09   | 0.21             | -0.017  | 0.007 | 0.81   | 0.81             | 0.157   | 0.007 | 0.02   | 0.09             |
| Sex                             | -0.065  | 0.003 | 0.32   | 0.79             | -0.012  | 0.005 | 0.84   | 0.84             | -0.077  | 0.006 | 0.26   | 0.33             | 0.016   | 0.006 | 0.79   | 0.89             |
| NICU stay                       | 0.030   | 0.008 | 0.72   | 0.81             | 0.058   | 0.012 | 0.46   | 0.91             | 0.070   | 0.014 | 0.41   | 0.96             | 0.039   | 0.014 | 0.62   | 0.94             |
| GA at delivery                  | 0.067   | 0.001 | 0.46   | 0.59             | 0.094   | 0.002 | 0.27   | 0.75             | 0.140   | 0.002 | 0.13   | 0.42             | 0.055   | 0.002 | 0.51   | 0.75             |
| GA at T2                        | -0.014  | 0.000 | 0.84   | 0.86             | 0.017   | 0.001 | 0.79   | 0.95             | 0.029   | 0.001 | 0.67   | 0.67             | 0.008   | 0.001 | 0.90   | 0.99             |
| PMA at scan                     | 0.396   | 0.001 | <0.001 | <b>&lt;0.001</b> | -0.537  | 0.002 | <0.001 | <b>&lt;0.001</b> | -0.394  | 0.002 | <0.001 | <b>&lt;0.001</b> | -0.528  | 0.002 | <0.001 | <b>&lt;0.001</b> |
| IL-6 T2:SES group               | -0.002  | 0.004 | 0.98   | 0.98             | 0.060   | 0.006 | 0.44   | 0.71             | 0.038   | 0.007 | 0.65   | 0.90             | 0.060   | 0.007 | 0.44   | 0.90             |
| <b>Corticospinal Tract</b>      |         |       |        |                  |         |       |        |                  |         |       |        |                  |         |       |        |                  |
| IL-6 T2                         | -0.231  | 0.002 | <0.01  | <b>0.01</b>      | 0.153   | 0.003 | 0.01   | 0.12             | 0.025   | 0.002 | 0.71   | 0.71             | 0.170   | 0.004 | 0.01   | 0.07             |
| SES group                       | -0.052  | 0.004 | 0.40   | 0.70             | 0.124   | 0.006 | 0.03   | 0.08             | 0.160   | 0.005 | 0.01   | <b>0.04</b>      | 0.104   | 0.007 | 0.07   | 0.14             |
| Sex                             | 0.041   | 0.003 | 0.47   | 0.79             | -0.046  | 0.005 | 0.37   | 0.71             | -0.035  | 0.004 | 0.52   | 0.52             | -0.045  | 0.006 | 0.39   | 0.88             |
| NICU stay                       | -0.028  | 0.008 | 0.70   | 0.81             | 0.000   | 0.012 | 1.00   | 1.00             | 0.022   | 0.009 | 0.75   | 0.96             | 0.002   | 0.014 | 0.98   | 0.98             |
| GA at delivery                  | 0.050   | 0.001 | 0.52   | 0.59             | -0.054  | 0.002 | 0.44   | 0.75             | -0.004  | 0.001 | 0.96   | 0.96             | -0.038  | 0.002 | 0.58   | 0.75             |
| GA at T2                        | 0.038   | 0.000 | 0.52   | 0.86             | 0.003   | 0.001 | 0.95   | 0.95             | 0.027   | 0.001 | 0.64   | 0.67             | -0.012  | 0.001 | 0.82   | 0.99             |
| PMA at scan                     | 0.541   | 0.001 | <0.001 | <b>&lt;0.001</b> | -0.693  | 0.002 | <0.001 | <b>&lt;0.001</b> | -0.651  | 0.001 | <0.001 | <b>&lt;0.001</b> | -0.672  | 0.002 | <0.001 | <b>&lt;0.001</b> |
| IL-6 T2:SES group               | 0.055   | 0.004 | 0.44   | 0.98             | -0.047  | 0.005 | 0.46   | 0.71             | -0.028  | 0.004 | 0.69   | 0.90             | -0.043  | 0.006 | 0.51   | 0.90             |
| <b>Optic Radiation</b>          |         |       |        |                  |         |       |        |                  |         |       |        |                  |         |       |        |                  |
| IL-6 T2                         | -0.171  | 0.002 | 0.01   | 0.06             | 0.051   | 0.003 | 0.42   | 0.95             | -0.066  | 0.003 | 0.39   | 0.69             | 0.086   | 0.004 | 0.16   | 0.49             |
| SES group                       | 0.014   | 0.004 | 0.82   | 0.86             | 0.136   | 0.006 | 0.02   | 0.08             | 0.206   | 0.007 | <0.01  | <b>0.03</b>      | 0.099   | 0.007 | 0.07   | 0.14             |
| Sex                             | -0.004  | 0.004 | 0.94   | 0.99             | -0.147  | 0.006 | 0.01   | <b>0.03</b>      | -0.222  | 0.006 | <0.01  | <b>0.01</b>      | -0.110  | 0.006 | 0.03   | 0.14             |
| NICU stay                       | -0.096  | 0.008 | 0.18   | 0.75             | 0.076   | 0.013 | 0.25   | 0.91             | 0.026   | 0.013 | 0.75   | 0.96             | 0.088   | 0.015 | 0.17   | 0.77             |

|                                             |        |       |        |                  |        |       |        |                  |        |       |        |                  |        |       |        |                  |
|---------------------------------------------|--------|-------|--------|------------------|--------|-------|--------|------------------|--------|-------|--------|------------------|--------|-------|--------|------------------|
| GA at delivery                              | 0.030  | 0.001 | 0.69   | 0.69             | -0.113 | 0.002 | 0.12   | 0.75             | -0.101 | 0.002 | 0.25   | 0.51             | -0.101 | 0.002 | 0.15   | 0.68             |
| GA at T2                                    | 0.046  | 0.001 | 0.43   | 0.86             | 0.039  | 0.001 | 0.47   | 0.95             | 0.071  | 0.001 | 0.29   | 0.52             | 0.021  | 0.001 | 0.69   | 0.99             |
| PMA at scan                                 | 0.548  | 0.001 | <0.001 | <b>&lt;0.001</b> | -0.615 | 0.002 | <0.001 | <b>&lt;0.001</b> | -0.351 | 0.002 | <0.001 | <b>&lt;0.001</b> | -0.641 | 0.002 | <0.001 | <b>&lt;0.001</b> |
| IL-6 T2:SES group                           | 0.037  | 0.004 | 0.60   | 0.98             | -0.022 | 0.006 | 0.73   | 0.92             | -0.010 | 0.006 | 0.90   | 0.90             | -0.024 | 0.007 | 0.70   | 0.90             |
| <b>Uncinate Fasciculus</b>                  |        |       |        |                  |        |       |        |                  |        |       |        |                  |        |       |        |                  |
| IL-6 T2                                     | -0.138 | 0.002 | 0.05   | 0.14             | -0.023 | 0.003 | 0.76   | 0.98             | -0.117 | 0.003 | 0.16   | 0.69             | 0.013  | 0.003 | 0.86   | 0.98             |
| SES group                                   | -0.079 | 0.003 | 0.21   | 0.46             | 0.068  | 0.006 | 0.30   | 0.45             | 0.018  | 0.007 | 0.81   | 0.81             | 0.077  | 0.006 | 0.21   | 0.29             |
| Sex                                         | -0.050 | 0.003 | 0.38   | 0.79             | -0.036 | 0.005 | 0.55   | 0.71             | -0.085 | 0.006 | 0.22   | 0.33             | -0.015 | 0.005 | 0.79   | 0.89             |
| NICU stay                                   | -0.012 | 0.007 | 0.87   | 0.87             | 0.019  | 0.011 | 0.81   | 0.91             | 0.004  | 0.013 | 0.96   | 0.96             | 0.024  | 0.012 | 0.73   | 0.94             |
| GA at delivery                              | 0.121  | 0.001 | 0.12   | 0.46             | 0.043  | 0.002 | 0.60   | 0.75             | 0.148  | 0.002 | 0.11   | 0.42             | -0.012 | 0.002 | 0.88   | 0.95             |
| GA at T2                                    | 0.010  | 0.000 | 0.86   | 0.86             | 0.077  | 0.001 | 0.22   | 0.95             | 0.099  | 0.001 | 0.16   | 0.46             | 0.053  | 0.001 | 0.37   | 0.99             |
| PMA at scan                                 | 0.537  | 0.001 | <0.001 | <b>&lt;0.001</b> | -0.570 | 0.002 | <0.001 | <b>&lt;0.001</b> | -0.257 | 0.002 | <0.001 | <b>&lt;0.001</b> | -0.625 | 0.002 | <0.001 | <b>&lt;0.001</b> |
| IL-6 T2:SES group                           | -0.008 | 0.003 | 0.91   | 0.98             | -0.059 | 0.005 | 0.44   | 0.71             | -0.089 | 0.006 | 0.30   | 0.90             | -0.033 | 0.006 | 0.64   | 0.90             |
| <b>Inferior Fronto-Occipital Fasciculus</b> |        |       |        |                  |        |       |        |                  |        |       |        |                  |        |       |        |                  |
| IL-6 T2                                     | -0.054 | 0.002 | 0.39   | 0.59             | -0.026 | 0.003 | 0.68   | 0.98             | -0.102 | 0.003 | 0.19   | 0.69             | -0.001 | 0.004 | 0.98   | 0.98             |
| SES group                                   | -0.034 | 0.004 | 0.54   | 0.70             | 0.077  | 0.007 | 0.19   | 0.34             | 0.115  | 0.005 | 0.10   | 0.30             | 0.068  | 0.008 | 0.23   | 0.29             |
| Sex                                         | 0.014  | 0.004 | 0.78   | 0.99             | -0.102 | 0.006 | 0.06   | 0.17             | -0.168 | 0.004 | 0.01   | <b>0.03</b>      | -0.073 | 0.007 | 0.16   | 0.49             |
| NICU stay                                   | -0.047 | 0.008 | 0.47   | 0.75             | 0.065  | 0.013 | 0.34   | 0.91             | 0.051  | 0.010 | 0.54   | 0.96             | 0.063  | 0.016 | 0.34   | 0.77             |
| GA at delivery                              | 0.089  | 0.001 | 0.21   | 0.46             | -0.024 | 0.002 | 0.74   | 0.75             | 0.081  | 0.002 | 0.36   | 0.51             | -0.048 | 0.002 | 0.50   | 0.75             |
| GA at T2                                    | 0.043  | 0.001 | 0.43   | 0.86             | 0.017  | 0.001 | 0.75   | 0.95             | 0.095  | 0.001 | 0.15   | 0.46             | -0.003 | 0.001 | 0.96   | 0.99             |
| PMA at scan                                 | 0.631  | 0.001 | <0.001 | <b>&lt;0.001</b> | -0.658 | 0.002 | <0.001 | <b>&lt;0.001</b> | -0.449 | 0.002 | <0.001 | <b>&lt;0.001</b> | -0.664 | 0.003 | <0.001 | <b>&lt;0.001</b> |
| IL-6 T2:SES group                           | -0.065 | 0.004 | 0.31   | 0.98             | 0.048  | 0.006 | 0.47   | 0.71             | 0.014  | 0.005 | 0.86   | 0.90             | 0.055  | 0.008 | 0.40   | 0.90             |
| <b>Anterior Limb of Internal Capsule</b>    |        |       |        |                  |        |       |        |                  |        |       |        |                  |        |       |        |                  |
| IL-6 T2                                     | -0.031 | 0.002 | 0.62   | 0.79             | -0.036 | 0.004 | 0.60   | 0.98             | -0.073 | 0.003 | 0.35   | 0.69             | -0.023 | 0.005 | 0.73   | 0.98             |
| SES group                                   | 0.010  | 0.003 | 0.86   | 0.86             | 0.028  | 0.008 | 0.65   | 0.69             | 0.046  | 0.007 | 0.52   | 0.81             | 0.020  | 0.009 | 0.74   | 0.74             |
| Sex                                         | 0.001  | 0.003 | 0.99   | 0.99             | -0.035 | 0.007 | 0.54   | 0.71             | -0.046 | 0.006 | 0.48   | 0.52             | -0.029 | 0.008 | 0.60   | 0.89             |
| NICU stay                                   | -0.061 | 0.007 | 0.35   | 0.75             | 0.065  | 0.016 | 0.37   | 0.91             | 0.047  | 0.013 | 0.57   | 0.96             | 0.068  | 0.018 | 0.33   | 0.77             |
| GA at delivery                              | 0.143  | 0.001 | 0.04   | 0.38             | -0.024 | 0.002 | 0.75   | 0.75             | 0.074  | 0.002 | 0.41   | 0.51             | -0.055 | 0.003 | 0.47   | 0.75             |
| GA at T2                                    | -0.013 | 0.000 | 0.80   | 0.86             | 0.062  | 0.001 | 0.30   | 0.95             | 0.097  | 0.001 | 0.15   | 0.46             | 0.049  | 0.001 | 0.39   | 0.99             |
| PMA at scan                                 | 0.614  | 0.001 | <0.001 | <b>&lt;0.001</b> | -0.601 | 0.002 | <0.001 | <b>&lt;0.001</b> | -0.452 | 0.002 | <0.001 | <b>&lt;0.001</b> | -0.623 | 0.003 | <0.001 | <b>&lt;0.001</b> |
| IL-6 T2:SES group                           | -0.004 | 0.003 | 0.95   | 0.98             | -0.012 | 0.007 | 0.86   | 0.92             | -0.020 | 0.006 | 0.81   | 0.90             | -0.010 | 0.008 | 0.89   | 0.97             |
| <b>Inferior Cingulum Bundle</b>             |        |       |        |                  |        |       |        |                  |        |       |        |                  |        |       |        |                  |
| IL-6 T2                                     | -0.083 | 0.002 | 0.29   | 0.59             | 0.001  | 0.002 | 0.99   | 0.99             | -0.058 | 0.002 | 0.47   | 0.69             | 0.037  | 0.002 | 0.58   | 0.98             |
| SES group                                   | -0.136 | 0.003 | 0.05   | 0.16             | 0.197  | 0.003 | <0.01  | <b>0.01</b>      | 0.107  | 0.005 | 0.14   | 0.31             | 0.178  | 0.004 | <0.01  | <b>0.02</b>      |
| Sex                                         | -0.041 | 0.003 | 0.53   | 0.79             | -0.178 | 0.003 | <0.01  | <b>0.01</b>      | -0.198 | 0.004 | <0.01  | <b>0.01</b>      | -0.144 | 0.003 | 0.01   | 0.08             |
| NICU stay                                   | -0.084 | 0.006 | 0.31   | 0.75             | 0.031  | 0.007 | 0.65   | 0.91             | -0.047 | 0.009 | 0.58   | 0.96             | 0.072  | 0.008 | 0.30   | 0.77             |
| GA at delivery                              | -0.125 | 0.001 | 0.16   | 0.46             | 0.047  | 0.001 | 0.53   | 0.75             | -0.069 | 0.001 | 0.45   | 0.51             | 0.105  | 0.001 | 0.16   | 0.68             |
| GA at T2                                    | 0.040  | 0.000 | 0.55   | 0.86             | 0.055  | 0.000 | 0.34   | 0.95             | 0.087  | 0.001 | 0.20   | 0.46             | 0.045  | 0.000 | 0.42   | 0.99             |
| PMA at scan                                 | 0.460  | 0.001 | <0.001 | <b>&lt;0.001</b> | -0.650 | 0.001 | <0.001 | <b>&lt;0.001</b> | -0.334 | 0.001 | <0.001 | <b>&lt;0.001</b> | -0.683 | 0.001 | <0.001 | <b>&lt;0.001</b> |
| IL-6 T2:SES group                           | -0.011 | 0.003 | 0.89   | 0.98             | -0.050 | 0.003 | 0.46   | 0.71             | -0.056 | 0.004 | 0.50   | 0.90             | -0.065 | 0.004 | 0.33   | 0.90             |
| <b>Fornix</b>                               |        |       |        |                  |        |       |        |                  |        |       |        |                  |        |       |        |                  |
| IL-6 T2                                     | 0.000  | 0.001 | 1.00   | 1.00             | -0.063 | 0.002 | 0.36   | 0.95             | -0.069 | 0.003 | 0.37   | 0.69             | -0.050 | 0.002 | 0.45   | 0.98             |
| SES group                                   | -0.190 | 0.002 | 0.01   | 0.05             | 0.057  | 0.004 | 0.35   | 0.45             | -0.024 | 0.005 | 0.72   | 0.81             | 0.105  | 0.004 | 0.08   | 0.14             |

|                   |        |       |        |                  |        |       |        |                  |        |       |        |                  |        |       |        |                  |
|-------------------|--------|-------|--------|------------------|--------|-------|--------|------------------|--------|-------|--------|------------------|--------|-------|--------|------------------|
| Sex               | -0.098 | 0.002 | 0.13   | 0.79             | -0.037 | 0.003 | 0.51   | 0.71             | -0.080 | 0.005 | 0.21   | 0.33             | -0.003 | 0.003 | 0.96   | 0.96             |
| NICU stay         | 0.056  | 0.005 | 0.50   | 0.75             | -0.018 | 0.008 | 0.80   | 0.91             | 0.007  | 0.011 | 0.93   | 0.96             | -0.031 | 0.008 | 0.66   | 0.94             |
| GA at delivery    | 0.089  | 0.001 | 0.32   | 0.57             | 0.028  | 0.001 | 0.71   | 0.75             | 0.084  | 0.002 | 0.34   | 0.51             | -0.005 | 0.001 | 0.95   | 0.95             |
| GA at T2          | 0.018  | 0.000 | 0.79   | 0.86             | -0.035 | 0.000 | 0.55   | 0.95             | -0.033 | 0.001 | 0.61   | 0.67             | -0.032 | 0.000 | 0.58   | 0.99             |
| PMA at scan       | 0.392  | 0.001 | <0.001 | <b>&lt;0.001</b> | -0.654 | 0.001 | <0.001 | <b>&lt;0.001</b> | -0.495 | 0.002 | <0.001 | <b>&lt;0.001</b> | -0.665 | 0.001 | <0.001 | <b>&lt;0.001</b> |
| IL-6 T2:SES group | 0.007  | 0.002 | 0.93   | 0.98             | 0.007  | 0.004 | 0.92   | 0.92             | 0.031  | 0.005 | 0.70   | 0.90             | -0.003 | 0.004 | 0.97   | 0.97             |

### IL-6 Trimester 3

|                                 | FA      |       |        |                  | MD      |       |        |                  | AD      |       |        |                  | RD      |       |        |                  |
|---------------------------------|---------|-------|--------|------------------|---------|-------|--------|------------------|---------|-------|--------|------------------|---------|-------|--------|------------------|
|                                 | $\beta$ | SE    | $p$    | $q$              | $\beta$ | SE    | $p$    | $q$              | $\beta$ | SE    | $p$    | $q$              | $\beta$ | SE    | $p$    | $q$              |
| <b>Corpus Callosum</b>          |         |       |        |                  |         |       |        |                  |         |       |        |                  |         |       |        |                  |
| IL-6 T3                         | 0.063   | 0.002 | 0.35   | 0.53             | -0.164  | 0.002 | 0.01   | 0.06             | -0.116  | 0.003 | 0.14   | 0.16             | -0.126  | 0.003 | 0.05   | 0.19             |
| SES group                       | 0.103   | 0.004 | 0.08   | 0.25             | -0.026  | 0.004 | 0.64   | 0.64             | 0.137   | 0.004 | 0.04   | 0.06             | -0.060  | 0.005 | 0.27   | 0.27             |
| Sex                             | -0.121  | 0.003 | 0.03   | 0.05             | 0.003   | 0.003 | 0.96   | 0.96             | -0.079  | 0.004 | 0.21   | 0.37             | 0.063   | 0.005 | 0.22   | 0.65             |
| NICU stay                       | -0.056  | 0.009 | 0.36   | 0.72             | -0.029  | 0.009 | 0.64   | 0.82             | -0.015  | 0.010 | 0.84   | 0.84             | -0.003  | 0.012 | 0.95   | 0.95             |
| GA at delivery                  | -0.019  | 0.001 | 0.78   | 0.17             | -0.006  | 0.001 | 0.93   | 0.93             | 0.036   | 0.002 | 0.66   | 0.99             | -0.016  | 0.002 | 0.81   | 0.99             |
| GA at T3                        | 0.006   | 0.001 | 0.92   | 0.68             | -0.006  | 0.001 | 0.92   | 0.95             | -0.015  | 0.001 | 0.83   | 0.93             | -0.016  | 0.001 | 0.77   | 0.93             |
| PMA at scan                     | 0.463   | 0.001 | <0.001 | <b>&lt;0.001</b> | -0.580  | 0.001 | <0.001 | <b>&lt;0.001</b> | -0.201  | 0.002 | <0.001 | <b>&lt;0.001</b> | -0.567  | 0.002 | <0.001 | <b>&lt;0.001</b> |
| IL-6 T3:SES group               | -0.137  | 0.004 | 0.04   | <b>0.01</b>      | 0.157   | 0.004 | 0.01   | 0.11             | 0.012   | 0.004 | 0.88   | 0.97             | 0.156   | 0.006 | 0.01   | 0.11             |
| <b>Superior Cingulum Bundle</b> |         |       |        |                  |         |       |        |                  |         |       |        |                  |         |       |        |                  |
| IL-6 T3                         | -0.026  | 0.002 | 0.73   | 0.73             | -0.103  | 0.003 | 0.13   | 0.19             | -0.152  | 0.004 | 0.03   | <b>0.04</b>      | -0.063  | 0.004 | 0.36   | 0.54             |
| SES group                       | -0.130  | 0.003 | 0.04   | 0.19             | 0.143   | 0.005 | 0.02   | <b>0.03</b>      | 0.050   | 0.006 | 0.42   | 0.42             | 0.163   | 0.006 | 0.01   | <b>0.02</b>      |
| Sex                             | -0.095  | 0.003 | 0.11   | 0.33             | -0.012  | 0.005 | 0.82   | 0.96             | -0.097  | 0.005 | 0.09   | 0.26             | 0.027   | 0.005 | 0.62   | 0.80             |
| NICU stay                       | -0.049  | 0.008 | 0.48   | 0.72             | -0.013  | 0.012 | 0.83   | 0.94             | -0.057  | 0.014 | 0.40   | 0.52             | 0.006   | 0.014 | 0.92   | 0.95             |
| GA at delivery                  | 0.059   | 0.001 | 0.46   | 0.72             | 0.027   | 0.002 | 0.71   | 0.93             | 0.061   | 0.002 | 0.43   | 0.97             | 0.004   | 0.002 | 0.95   | 0.99             |
| GA at T3                        | -0.047  | 0.001 | 0.47   | 0.88             | 0.004   | 0.001 | 0.95   | 0.95             | -0.027  | 0.001 | 0.67   | 0.93             | 0.016   | 0.001 | 0.78   | 0.93             |
| PMA at scan                     | 0.324   | 0.001 | <0.001 | <b>&lt;0.001</b> | -0.529  | 0.002 | <0.001 | <b>&lt;0.001</b> | -0.413  | 0.002 | <0.001 | <b>&lt;0.001</b> | -0.504  | 0.002 | <0.001 | <b>&lt;0.001</b> |
| IL-6 T3:SES group               | 0.103   | 0.004 | 0.15   | 0.42             | 0.066   | 0.006 | 0.32   | 0.48             | 0.162   | 0.006 | 0.02   | 0.20             | 0.009   | 0.006 | 0.89   | 0.89             |
| <b>Corticospinal Tract</b>      |         |       |        |                  |         |       |        |                  |         |       |        |                  |         |       |        |                  |
| IL-6 T3                         | -0.123  | 0.002 | 0.05   | 0.23             | -0.015  | 0.003 | 0.78   | 0.78             | -0.146  | 0.002 | 0.02   | 0.03             | 0.028   | 0.004 | 0.63   | 0.81             |
| SES group                       | 0.008   | 0.003 | 0.89   | 0.89             | 0.135   | 0.005 | 0.01   | <b>0.02</b>      | 0.245   | 0.004 | <0.001 | <b>&lt;0.001</b> | 0.090   | 0.006 | 0.07   | 0.11             |
| Sex                             | 0.006   | 0.003 | 0.91   | 0.91             | -0.039  | 0.004 | 0.39   | 0.87             | -0.051  | 0.004 | 0.30   | 0.45             | -0.029  | 0.005 | 0.53   | 0.80             |
| NICU stay                       | -0.064  | 0.008 | 0.28   | 0.72             | -0.001  | 0.011 | 0.98   | 0.98             | -0.079  | 0.009 | 0.18   | 0.32             | 0.015   | 0.014 | 0.78   | 0.95             |
| GA at delivery                  | -0.023  | 0.001 | 0.73   | 0.78             | -0.046  | 0.002 | 0.44   | 0.80             | -0.097  | 0.001 | 0.14   | 0.65             | 0.000   | 0.002 | 0.99   | 0.99             |
| GA at T3                        | 0.082   | 0.001 | 0.14   | 0.88             | -0.065  | 0.001 | 0.18   | 0.95             | -0.026  | 0.001 | 0.63   | 0.93             | -0.073  | 0.001 | 0.15   | 0.93             |
| PMA at scan                     | 0.532   | 0.001 | <0.001 | <b>&lt;0.001</b> | -0.669  | 0.002 | <0.001 | <b>&lt;0.001</b> | -0.576  | 0.001 | <0.001 | <b>&lt;0.001</b> | -0.656  | 0.002 | <0.001 | <b>&lt;0.001</b> |
| IL-6 T3:SES group               | -0.073  | 0.004 | 0.24   | 0.42             | 0.076   | 0.005 | 0.17   | 0.37             | 0.045   | 0.004 | 0.45   | 0.58             | 0.083   | 0.006 | 0.14   | 0.36             |
| <b>Optic Radiation</b>          |         |       |        |                  |         |       |        |                  |         |       |        |                  |         |       |        |                  |
| IL-6 T3                         | -0.050  | 0.002 | 0.45   | 0.58             | -0.025  | 0.004 | 0.68   | 0.77             | -0.061  | 0.004 | 0.38   | 0.38             | -0.004  | 0.004 | 0.95   | 0.95             |
| SES group                       | 0.083   | 0.004 | 0.14   | 0.32             | 0.183   | 0.006 | <0.01  | <b>&lt;0.01</b>  | 0.321   | 0.006 | <0.001 | <b>&lt;0.001</b> | 0.116   | 0.007 | 0.03   | 0.05             |
| Sex                             | 0.013   | 0.003 | 0.80   | 0.90             | -0.102  | 0.005 | 0.04   | 0.27             | -0.149  | 0.005 | 0.01   | 0.08             | -0.078  | 0.006 | 0.11   | 0.47             |
| NICU stay                       | -0.101  | 0.009 | 0.10   | 0.47             | 0.040   | 0.013 | 0.49   | 0.82             | -0.034  | 0.013 | 0.60   | 0.68             | 0.062   | 0.015 | 0.28   | 0.95             |
| GA at delivery                  | -0.041  | 0.001 | 0.56   | 0.72             | -0.109  | 0.002 | 0.10   | 0.80             | -0.173  | 0.002 | 0.02   | 0.20             | -0.068  | 0.002 | 0.29   | 0.65             |
| GA at T3                        | 0.004   | 0.001 | 0.94   | 0.94             | -0.008  | 0.001 | 0.88   | 0.95             | 0.003   | 0.001 | 0.96   | 0.96             | -0.011  | 0.001 | 0.83   | 0.93             |

|                                             |        |       |        |                  |        |       |        |                  |        |       |        |                  |        |       |        |                  |
|---------------------------------------------|--------|-------|--------|------------------|--------|-------|--------|------------------|--------|-------|--------|------------------|--------|-------|--------|------------------|
| PMA at scan                                 | 0.538  | 0.001 | <0.001 | <b>&lt;0.001</b> | -0.561 | 0.002 | <0.001 | <b>&lt;0.001</b> | -0.274 | 0.002 | <0.001 | <b>&lt;0.001</b> | -0.600 | 0.002 | <0.001 | <b>&lt;0.001</b> |
| IL-6 T3:SES group                           | -0.020 | 0.004 | 0.75   | 0.75             | 0.019  | 0.006 | 0.75   | 0.75             | 0.002  | 0.006 | 0.97   | 0.97             | 0.022  | 0.007 | 0.71   | 0.79             |
| <b>Uncinate Fasciculus</b>                  |        |       |        |                  |        |       |        |                  |        |       |        |                  |        |       |        |                  |
| IL-6 T3                                     | -0.090 | 0.002 | 0.17   | 0.50             | -0.103 | 0.003 | 0.12   | 0.19             | -0.178 | 0.004 | 0.01   | <b>0.02</b>      | -0.059 | 0.003 | 0.36   | 0.54             |
| SES group                                   | -0.048 | 0.003 | 0.40   | 0.60             | 0.140  | 0.005 | 0.01   | <b>0.03</b>      | 0.117  | 0.006 | 0.06   | 0.08             | 0.127  | 0.005 | 0.02   | 0.05             |
| Sex                                         | -0.073 | 0.003 | 0.16   | 0.36             | -0.031 | 0.004 | 0.55   | 0.96             | -0.090 | 0.005 | 0.12   | 0.26             | -0.002 | 0.005 | 0.97   | 0.97             |
| NICU stay                                   | -0.032 | 0.007 | 0.61   | 0.72             | -0.155 | 0.011 | 0.01   | 0.12             | -0.194 | 0.013 | <0.01  | <b>0.04</b>      | -0.110 | 0.012 | 0.07   | 0.62             |
| GA at delivery                              | 0.144  | 0.001 | 0.04   | 0.37             | -0.014 | 0.002 | 0.85   | 0.93             | 0.083  | 0.002 | 0.28   | 0.83             | -0.062 | 0.002 | 0.36   | 0.65             |
| GA at T3                                    | -0.027 | 0.001 | 0.64   | 0.88             | -0.031 | 0.001 | 0.59   | 0.95             | -0.044 | 0.001 | 0.48   | 0.93             | -0.018 | 0.001 | 0.75   | 0.93             |
| PMA at scan                                 | 0.455  | 0.001 | <0.001 | <b>&lt;0.001</b> | -0.540 | 0.002 | <0.001 | <b>&lt;0.001</b> | -0.280 | 0.002 | <0.001 | <b>&lt;0.001</b> | -0.583 | 0.002 | <0.001 | <b>&lt;0.001</b> |
| IL-6 T3:SES group                           | -0.030 | 0.003 | 0.64   | 0.72             | -0.081 | 0.005 | 0.21   | 0.37             | -0.110 | 0.006 | 0.12   | 0.34             | -0.052 | 0.006 | 0.41   | 0.73             |
| <b>Inferior Fronto-Occipital Fasciculus</b> |        |       |        |                  |        |       |        |                  |        |       |        |                  |        |       |        |                  |
| IL-6 T3                                     | 0.025  | 0.002 | 0.68   | 0.73             | -0.137 | 0.003 | 0.02   | 0.06             | -0.188 | 0.003 | 0.01   | <b>0.02</b>      | -0.108 | 0.004 | 0.06   | 0.19             |
| SES group                                   | 0.013  | 0.004 | 0.81   | 0.89             | 0.120  | 0.005 | 0.02   | <b>0.03</b>      | 0.233  | 0.004 | <0.001 | <b>&lt;0.001</b> | 0.083  | 0.007 | 0.10   | 0.11             |
| Sex                                         | -0.020 | 0.003 | 0.68   | 0.87             | -0.069 | 0.005 | 0.14   | 0.43             | -0.127 | 0.004 | 0.02   | 0.10             | -0.040 | 0.006 | 0.38   | 0.80             |
| NICU stay                                   | -0.047 | 0.008 | 0.41   | 0.72             | -0.031 | 0.013 | 0.57   | 0.82             | -0.088 | 0.010 | 0.18   | 0.32             | -0.007 | 0.016 | 0.90   | 0.95             |
| GA at delivery                              | 0.081  | 0.001 | 0.21   | 0.62             | -0.074 | 0.002 | 0.25   | 0.80             | -0.017 | 0.002 | 0.82   | 0.99             | -0.079 | 0.003 | 0.21   | 0.65             |
| GA at T3                                    | 0.021  | 0.001 | 0.69   | 0.88             | -0.026 | 0.001 | 0.61   | 0.95             | -0.018 | 0.001 | 0.76   | 0.93             | -0.028 | 0.001 | 0.58   | 0.93             |
| PMA at scan                                 | 0.599  | 0.001 | <0.001 | <b>&lt;0.001</b> | -0.640 | 0.002 | <0.001 | <b>&lt;0.001</b> | -0.419 | 0.002 | <0.001 | <b>&lt;0.001</b> | -0.649 | 0.002 | <0.001 | <b>&lt;0.001</b> |
| IL-6 T3:SES group                           | -0.053 | 0.004 | 0.36   | 0.46             | 0.086  | 0.006 | 0.14   | 0.37             | 0.088  | 0.005 | 0.20   | 0.34             | 0.080  | 0.007 | 0.16   | 0.36             |
| <b>Anterior Limb of Internal Capsule</b>    |        |       |        |                  |        |       |        |                  |        |       |        |                  |        |       |        |                  |
| IL-6 T3                                     | 0.061  | 0.002 | 0.30   | 0.53             | -0.145 | 0.004 | 0.02   | 0.06             | -0.177 | 0.003 | 0.01   | <b>0.02</b>      | -0.131 | 0.005 | 0.03   | 0.19             |
| SES group                                   | 0.011  | 0.003 | 0.82   | 0.89             | 0.113  | 0.007 | 0.04   | <b>0.04</b>      | 0.164  | 0.006 | 0.01   | <b>0.01</b>      | 0.088  | 0.007 | 0.09   | 0.11             |
| Sex                                         | -0.044 | 0.003 | 0.35   | 0.63             | -0.007 | 0.006 | 0.89   | 0.96             | -0.025 | 0.005 | 0.65   | 0.65             | 0.004  | 0.007 | 0.94   | 0.97             |
| NICU stay                                   | -0.026 | 0.007 | 0.64   | 0.72             | -0.056 | 0.015 | 0.34   | 0.82             | -0.108 | 0.013 | 0.10   | 0.30             | -0.035 | 0.017 | 0.54   | 0.95             |
| GA at delivery                              | 0.110  | 0.001 | 0.08   | 0.37             | -0.061 | 0.002 | 0.36   | 0.80             | 0.008  | 0.002 | 0.91   | 0.99             | -0.076 | 0.003 | 0.24   | 0.65             |
| GA at T3                                    | 0.038  | 0.001 | 0.46   | 0.88             | -0.049 | 0.001 | 0.37   | 0.95             | -0.040 | 0.001 | 0.51   | 0.93             | -0.048 | 0.001 | 0.36   | 0.93             |
| PMA at scan                                 | 0.600  | 0.001 | <0.001 | <b>&lt;0.001</b> | -0.604 | 0.002 | <0.001 | <b>&lt;0.001</b> | -0.465 | 0.002 | <0.001 | <b>&lt;0.001</b> | -0.625 | 0.003 | <0.001 | <b>&lt;0.001</b> |
| IL-6 T3:SES group                           | -0.068 | 0.003 | 0.24   | 0.42             | 0.084  | 0.007 | 0.17   | 0.37             | 0.082  | 0.006 | 0.23   | 0.34             | 0.082  | 0.008 | 0.16   | 0.36             |
| <b>Inferior Cingulum Bundle</b>             |        |       |        |                  |        |       |        |                  |        |       |        |                  |        |       |        |                  |
| IL-6 T3                                     | -0.194 | 0.002 | 0.01   | 0.07             | -0.083 | 0.002 | 0.18   | 0.24             | -0.221 | 0.003 | <0.01  | <b>0.02</b>      | 0.013  | 0.002 | 0.83   | 0.94             |
| SES group                                   | -0.062 | 0.003 | 0.32   | 0.58             | 0.209  | 0.003 | <0.001 | <b>&lt;0.01</b>  | 0.167  | 0.004 | 0.01   | <b>0.01</b>      | 0.168  | 0.003 | <0.01  | <b>0.02</b>      |
| Sex                                         | 0.041  | 0.002 | 0.48   | 0.72             | -0.094 | 0.003 | 0.06   | 0.27             | -0.048 | 0.004 | 0.41   | 0.46             | -0.100 | 0.003 | 0.05   | 0.42             |
| NICU stay                                   | -0.118 | 0.006 | 0.08   | 0.47             | -0.032 | 0.007 | 0.59   | 0.82             | -0.113 | 0.009 | 0.10   | 0.30             | 0.039  | 0.008 | 0.51   | 0.95             |
| GA at delivery                              | -0.073 | 0.001 | 0.35   | 0.72             | 0.059  | 0.001 | 0.38   | 0.80             | -0.005 | 0.002 | 0.95   | 0.99             | 0.093  | 0.001 | 0.17   | 0.65             |
| GA at T3                                    | -0.046 | 0.000 | 0.47   | 0.88             | -0.030 | 0.001 | 0.59   | 0.95             | -0.063 | 0.001 | 0.32   | 0.93             | 0.001  | 0.001 | 0.98   | 0.98             |
| PMA at scan                                 | 0.371  | 0.001 | <0.001 | <b>&lt;0.001</b> | -0.615 | 0.001 | <0.001 | <b>&lt;0.001</b> | -0.349 | 0.001 | <0.001 | <b>&lt;0.001</b> | -0.625 | 0.001 | <0.001 | <b>&lt;0.001</b> |
| IL-6 T3:SES group                           | 0.070  | 0.003 | 0.32   | 0.46             | 0.039  | 0.003 | 0.52   | 0.67             | 0.095  | 0.004 | 0.18   | 0.34             | -0.026 | 0.004 | 0.67   | 0.79             |
| <b>Fornix</b>                               |        |       |        |                  |        |       |        |                  |        |       |        |                  |        |       |        |                  |
| IL-6 T3                                     | -0.075 | 0.001 | 0.30   | 0.53             | -0.132 | 0.002 | 0.04   | 0.08             | -0.181 | 0.003 | 0.01   | <b>0.02</b>      | -0.082 | 0.002 | 0.18   | 0.41             |
| SES group                                   | -0.150 | 0.002 | 0.02   | 0.16             | 0.116  | 0.003 | 0.03   | <b>0.04</b>      | 0.052  | 0.005 | 0.39   | 0.42             | 0.144  | 0.003 | 0.01   | <b>0.02</b>      |
| Sex                                         | -0.106 | 0.002 | 0.07   | 0.30             | 0.005  | 0.003 | 0.93   | 0.96             | -0.048 | 0.004 | 0.39   | 0.46             | 0.037  | 0.003 | 0.45   | 0.80             |
| NICU stay                                   | -0.022 | 0.005 | 0.75   | 0.75             | -0.048 | 0.008 | 0.41   | 0.82             | -0.069 | 0.011 | 0.30   | 0.45             | -0.031 | 0.008 | 0.59   | 0.95             |

|                   |        |       |        |                  |        |       |        |                  |        |       |        |                  |        |       |        |                  |
|-------------------|--------|-------|--------|------------------|--------|-------|--------|------------------|--------|-------|--------|------------------|--------|-------|--------|------------------|
| GA at delivery    | 0.045  | 0.001 | 0.56   | 0.72             | -0.024 | 0.001 | 0.72   | 0.93             | 0.001  | 0.002 | 0.99   | 0.99             | -0.033 | 0.001 | 0.62   | 0.93             |
| GA at T3          | -0.032 | 0.000 | 0.62   | 0.88             | 0.004  | 0.001 | 0.95   | 0.95             | -0.027 | 0.001 | 0.66   | 0.93             | 0.016  | 0.001 | 0.77   | 0.93             |
| PMA at scan       | 0.343  | 0.001 | <0.001 | <b>&lt;0.001</b> | -0.622 | 0.001 | <0.001 | <b>&lt;0.001</b> | -0.474 | 0.002 | <0.001 | <b>&lt;0.001</b> | -0.631 | 0.001 | <0.001 | <b>&lt;0.001</b> |
| IL-6 T3:SES group | 0.127  | 0.002 | 0.07   | 0.33             | 0.022  | 0.004 | 0.72   | 0.75             | 0.105  | 0.005 | 0.12   | 0.34             | -0.028 | 0.004 | 0.64   | 0.79             |

### IL-8 Trimester 1

|                                 | FA      |       |        |                  | MD      |       |        |                  | AD      |       |        |                  | RD      |       |        |                  |
|---------------------------------|---------|-------|--------|------------------|---------|-------|--------|------------------|---------|-------|--------|------------------|---------|-------|--------|------------------|
|                                 | $\beta$ | SE    | $p$    | $q$              | $\beta$ | SE    | $p$    | $q$              | $\beta$ | SE    | $p$    | $q$              | $\beta$ | SE    | $p$    | $q$              |
| <b>Corpus Callosum</b>          |         |       |        |                  |         |       |        |                  |         |       |        |                  |         |       |        |                  |
| IL-8 T1                         | -0.002  | 0.003 | 0.99   | 0.99             | 0.134   | 0.003 | 0.10   | 0.48             | 0.099   | 0.004 | 0.30   | 0.75             | 0.097   | 0.004 | 0.23   | 0.73             |
| SES group                       | 0.139   | 0.004 | 0.03   | 0.21             | -0.003  | 0.004 | 0.97   | 0.97             | 0.218   | 0.005 | <0.01  | <b>0.01</b>      | -0.084  | 0.005 | 0.18   | 0.21             |
| Sex                             | -0.146  | 0.004 | 0.02   | 0.16             | 0.051   | 0.004 | 0.41   | 0.70             | -0.111  | 0.005 | 0.13   | 0.23             | 0.106   | 0.005 | 0.08   | 0.76             |
| NICU stay                       | 0.013   | 0.009 | 0.86   | 0.90             | -0.089  | 0.009 | 0.22   | 0.98             | 0.041   | 0.010 | 0.61   | 0.91             | -0.092  | 0.012 | 0.20   | 0.99             |
| GA at delivery                  | -0.055  | 0.002 | 0.49   | 0.63             | 0.054   | 0.002 | 0.49   | 0.79             | -0.030  | 0.002 | 0.73   | 0.95             | 0.050   | 0.002 | 0.52   | 0.76             |
| GA at T1                        | -0.077  | 0.001 | 0.23   | 0.50             | 0.089   | 0.001 | 0.15   | 0.77             | 0.016   | 0.001 | 0.83   | 0.83             | 0.097   | 0.001 | 0.12   | 0.62             |
| PMA at scan                     | 0.455   | 0.002 | <0.001 | <b>&lt;0.001</b> | -0.531  | 0.002 | <0.001 | <b>&lt;0.001</b> | -0.116  | 0.002 | 0.16   | 0.16             | -0.527  | 0.002 | <0.001 | <b>&lt;0.001</b> |
| IL-8 T1:SES group               | -0.005  | 0.005 | 0.95   | 0.95             | -0.098  | 0.005 | 0.23   | 0.54             | -0.113  | 0.006 | 0.24   | 0.71             | -0.055  | 0.006 | 0.49   | 0.92             |
| <b>Superior Cingulum Bundle</b> |         |       |        |                  |         |       |        |                  |         |       |        |                  |         |       |        |                  |
| IL-8 T1                         | -0.024  | 0.003 | 0.79   | 0.99             | 0.034   | 0.004 | 0.69   | 0.88             | 0.022   | 0.005 | 0.81   | 0.91             | 0.036   | 0.005 | 0.67   | 0.86             |
| SES group                       | -0.141  | 0.004 | 0.05   | 0.21             | 0.193   | 0.006 | 0.00   | 0.01             | 0.102   | 0.007 | 0.15   | 0.15             | 0.204   | 0.007 | <0.01  | <b>0.01</b>      |
| Sex                             | -0.120  | 0.003 | 0.08   | 0.25             | -0.048  | 0.006 | 0.45   | 0.70             | -0.149  | 0.006 | 0.03   | 0.07             | 0.001   | 0.006 | 0.98   | 0.98             |
| NICU stay                       | 0.030   | 0.008 | 0.71   | 0.90             | 0.025   | 0.013 | 0.74   | 0.98             | 0.034   | 0.015 | 0.67   | 0.91             | 0.011   | 0.014 | 0.88   | 0.99             |
| GA at delivery                  | 0.153   | 0.001 | 0.08   | 0.23             | -0.037  | 0.002 | 0.64   | 0.79             | 0.069   | 0.003 | 0.43   | 0.95             | -0.087  | 0.003 | 0.28   | 0.76             |
| GA at T1                        | -0.022  | 0.001 | 0.75   | 0.84             | -0.021  | 0.001 | 0.74   | 0.95             | -0.051  | 0.001 | 0.46   | 0.83             | -0.009  | 0.001 | 0.89   | 0.89             |
| PMA at scan                     | 0.286   | 0.001 | <0.001 | <b>&lt;0.001</b> | -0.498  | 0.002 | <0.001 | <b>&lt;0.001</b> | -0.402  | 0.003 | <0.001 | <b>&lt;0.001</b> | -0.470  | 0.002 | <0.001 | <b>&lt;0.001</b> |
| IL-8 T1:SES group               | -0.032  | 0.004 | 0.73   | 0.83             | -0.004  | 0.007 | 0.96   | 0.96             | -0.032  | 0.008 | 0.73   | 1.00             | 0.008   | 0.008 | 0.93   | 0.93             |
| <b>Corticospinal Tract</b>      |         |       |        |                  |         |       |        |                  |         |       |        |                  |         |       |        |                  |
| IL-8 T1                         | 0.020   | 0.003 | 0.81   | 0.99             | 0.013   | 0.004 | 0.86   | 0.92             | 0.031   | 0.003 | 0.68   | 0.88             | 0.005   | 0.005 | 0.95   | 0.95             |
| SES group                       | 0.087   | 0.004 | 0.18   | 0.54             | 0.127   | 0.005 | 0.03   | <b>0.03</b>      | 0.284   | 0.004 | <0.001 | <b>&lt;0.001</b> | 0.063   | 0.006 | 0.28   | 0.28             |
| Sex                             | -0.077  | 0.003 | 0.23   | 0.39             | 0.005   | 0.005 | 0.93   | 0.93             | -0.049  | 0.004 | 0.41   | 0.52             | 0.024   | 0.006 | 0.67   | 0.98             |
| NICU stay                       | 0.098   | 0.008 | 0.18   | 0.90             | 0.001   | 0.011 | 0.98   | 0.98             | 0.074   | 0.010 | 0.28   | 0.91             | -0.024  | 0.014 | 0.72   | 0.99             |
| GA at delivery                  | -0.026  | 0.001 | 0.74   | 0.84             | 0.018   | 0.002 | 0.79   | 0.79             | 0.005   | 0.002 | 0.95   | 0.95             | 0.021   | 0.002 | 0.77   | 0.87             |
| GA at T1                        | 0.005   | 0.001 | 0.94   | 0.94             | 0.022   | 0.001 | 0.69   | 0.95             | 0.045   | 0.001 | 0.45   | 0.83             | 0.013   | 0.001 | 0.83   | 0.89             |
| PMA at scan                     | 0.517   | 0.001 | <0.001 | <b>&lt;0.001</b> | -0.678  | 0.002 | <0.001 | <b>&lt;0.001</b> | -0.582  | 0.002 | <0.001 | <b>&lt;0.001</b> | -0.660  | 0.002 | <0.001 | <b>&lt;0.001</b> |
| IL-8 T1:SES group               | -0.052  | 0.004 | 0.53   | 0.83             | 0.010   | 0.006 | 0.89   | 0.96             | -0.031  | 0.005 | 0.68   | 1.00             | 0.024   | 0.008 | 0.75   | 0.92             |
| <b>Optic Radiation</b>          |         |       |        |                  |         |       |        |                  |         |       |        |                  |         |       |        |                  |
| IL-8 T1                         | 0.043   | 0.003 | 0.60   | 0.99             | -0.008  | 0.005 | 0.92   | 0.92             | 0.004   | 0.005 | 0.97   | 0.97             | -0.019  | 0.006 | 0.81   | 0.91             |
| SES group                       | 0.056   | 0.004 | 0.38   | 0.85             | 0.194   | 0.007 | <0.01  | <b>0.01</b>      | 0.305   | 0.006 | <0.001 | <b>&lt;0.001</b> | 0.138   | 0.007 | 0.02   | 0.07             |
| Sex                             | -0.074  | 0.004 | 0.23   | 0.39             | -0.070  | 0.006 | 0.25   | 0.70             | -0.174  | 0.006 | 0.01   | 0.05             | -0.032  | 0.007 | 0.59   | 0.98             |
| NICU stay                       | -0.088  | 0.008 | 0.22   | 0.90             | 0.045   | 0.014 | 0.52   | 0.98             | 0.008   | 0.014 | 0.91   | 0.91             | 0.059   | 0.016 | 0.40   | 0.99             |
| GA at delivery                  | -0.097  | 0.001 | 0.21   | 0.38             | -0.028  | 0.003 | 0.71   | 0.79             | -0.102  | 0.002 | 0.23   | 0.95             | 0.002   | 0.003 | 0.97   | 0.97             |
| GA at T1                        | -0.025  | 0.001 | 0.69   | 0.84             | 0.012   | 0.001 | 0.84   | 0.95             | 0.028   | 0.001 | 0.68   | 0.83             | 0.020   | 0.002 | 0.74   | 0.89             |
| PMA at scan                     | 0.555   | 0.001 | <0.001 | <b>&lt;0.001</b> | -0.562  | 0.003 | <0.001 | <b>&lt;0.001</b> | -0.303  | 0.002 | <0.001 | <b>&lt;0.001</b> | -0.603  | 0.003 | <0.001 | <b>&lt;0.001</b> |
| IL-8 T1:SES group               | -0.064  | 0.004 | 0.43   | 0.83             | 0.036   | 0.008 | 0.65   | 0.96             | 0.021   | 0.008 | 0.81   | 1.00             | 0.047   | 0.009 | 0.54   | 0.92             |

| Uncinate Fasciculus                  |        |       |        |                  |        |       |        |                  |        |       |        |                  |        |       |        |                  |
|--------------------------------------|--------|-------|--------|------------------|--------|-------|--------|------------------|--------|-------|--------|------------------|--------|-------|--------|------------------|
| IL-8 T1                              | 0.018  | 0.002 | 0.83   | 0.99             | 0.076  | 0.004 | 0.35   | 0.63             | 0.093  | 0.005 | 0.31   | 0.75             | 0.061  | 0.004 | 0.44   | 0.79             |
| SES group                            | 0.006  | 0.003 | 0.93   | 0.95             | 0.162  | 0.005 | 0.01   | <b>0.02</b>      | 0.189  | 0.006 | 0.01   | <b>0.01</b>      | 0.124  | 0.006 | 0.04   | 0.07             |
| Sex                                  | -0.132 | 0.003 | 0.03   | 0.16             | -0.062 | 0.005 | 0.32   | 0.70             | -0.164 | 0.006 | 0.02   | 0.05             | -0.009 | 0.005 | 0.87   | 0.98             |
| NICU stay                            | 0.009  | 0.007 | 0.90   | 0.90             | -0.008 | 0.012 | 0.91   | 0.98             | -0.019 | 0.014 | 0.81   | 0.91             | -0.001 | 0.013 | 0.99   | 0.99             |
| GA at delivery                       | 0.110  | 0.001 | 0.16   | 0.36             | 0.099  | 0.002 | 0.21   | 0.79             | 0.184  | 0.002 | 0.03   | 0.31             | 0.040  | 0.002 | 0.59   | 0.76             |
| GA at T1                             | -0.127 | 0.001 | 0.04   | 0.37             | 0.021  | 0.001 | 0.73   | 0.95             | -0.059 | 0.001 | 0.39   | 0.83             | 0.047  | 0.001 | 0.43   | 0.78             |
| PMA at scan                          | 0.450  | 0.001 | <0.001 | <b>&lt;0.001</b> | -0.584 | 0.002 | <0.001 | <b>&lt;0.001</b> | -0.333 | 0.002 | <0.001 | <b>&lt;0.001</b> | -0.616 | 0.002 | <0.001 | <b>&lt;0.001</b> |
| IL-8 T1:SES group                    | -0.045 | 0.004 | 0.58   | 0.83             | -0.095 | 0.006 | 0.24   | 0.54             | -0.131 | 0.008 | 0.15   | 0.71             | -0.066 | 0.007 | 0.40   | 0.92             |
| Inferior Fronto-Occipital Fasciculus |        |       |        |                  |        |       |        |                  |        |       |        |                  |        |       |        |                  |
| IL-8 T1                              | 0.001  | 0.003 | 0.99   | 0.99             | 0.048  | 0.004 | 0.51   | 0.77             | 0.080  | 0.003 | 0.34   | 0.75             | 0.032  | 0.005 | 0.65   | 0.86             |
| SES group                            | 0.003  | 0.004 | 0.95   | 0.95             | 0.168  | 0.006 | <0.01  | <b>0.01</b>      | 0.315  | 0.005 | <0.001 | <b>&lt;0.001</b> | 0.120  | 0.007 | 0.03   | 0.07             |
| Sex                                  | -0.034 | 0.004 | 0.55   | 0.62             | -0.091 | 0.006 | 0.10   | 0.70             | -0.180 | 0.004 | <0.01  | <b>0.04</b>      | -0.053 | 0.007 | 0.33   | 0.98             |
| NICU stay                            | -0.009 | 0.008 | 0.89   | 0.90             | 0.025  | 0.013 | 0.70   | 0.98             | 0.038  | 0.010 | 0.60   | 0.91             | 0.020  | 0.016 | 0.76   | 0.99             |
| GA at delivery                       | 0.064  | 0.001 | 0.36   | 0.55             | -0.053 | 0.002 | 0.44   | 0.79             | -0.007 | 0.002 | 0.93   | 0.95             | -0.060 | 0.003 | 0.39   | 0.76             |
| GA at T1                             | -0.076 | 0.001 | 0.18   | 0.50             | 0.037  | 0.001 | 0.50   | 0.95             | -0.016 | 0.001 | 0.80   | 0.83             | 0.058  | 0.002 | 0.29   | 0.78             |
| PMA at scan                          | 0.604  | 0.001 | <0.001 | <b>&lt;0.001</b> | -0.644 | 0.002 | <0.001 | <b>&lt;0.001</b> | -0.440 | 0.002 | <0.001 | <b>&lt;0.001</b> | -0.650 | 0.003 | <0.001 | <b>&lt;0.001</b> |
| IL-8 T1:SES group                    | -0.028 | 0.004 | 0.70   | 0.83             | 0.013  | 0.007 | 0.86   | 0.96             | 0.000  | 0.005 | 1.00   | 1.00             | 0.016  | 0.009 | 0.82   | 0.92             |
| Anterior Limb of Internal Capsule    |        |       |        |                  |        |       |        |                  |        |       |        |                  |        |       |        |                  |
| IL-8 T1                              | -0.060 | 0.002 | 0.41   | 0.99             | 0.075  | 0.005 | 0.34   | 0.63             | 0.062  | 0.005 | 0.48   | 0.78             | 0.075  | 0.006 | 0.32   | 0.73             |
| SES group                            | 0.011  | 0.003 | 0.85   | 0.95             | 0.139  | 0.007 | 0.02   | <b>0.03</b>      | 0.202  | 0.006 | <0.01  | <b>0.01</b>      | 0.109  | 0.008 | 0.07   | 0.09             |
| Sex                                  | -0.059 | 0.003 | 0.29   | 0.39             | -0.020 | 0.007 | 0.74   | 0.83             | -0.060 | 0.006 | 0.37   | 0.52             | -0.003 | 0.008 | 0.95   | 0.98             |
| NICU stay                            | 0.020  | 0.007 | 0.76   | 0.90             | 0.028  | 0.016 | 0.69   | 0.98             | 0.048  | 0.014 | 0.54   | 0.91             | 0.020  | 0.017 | 0.77   | 0.99             |
| GA at delivery                       | 0.134  | 0.001 | 0.06   | 0.23             | -0.052 | 0.003 | 0.48   | 0.79             | 0.020  | 0.002 | 0.81   | 0.95             | -0.074 | 0.003 | 0.31   | 0.76             |
| GA at T1                             | -0.046 | 0.001 | 0.41   | 0.61             | 0.050  | 0.002 | 0.40   | 0.95             | 0.037  | 0.001 | 0.58   | 0.83             | 0.051  | 0.002 | 0.37   | 0.78             |
| PMA at scan                          | 0.567  | 0.001 | <0.001 | <b>&lt;0.001</b> | -0.560 | 0.003 | <0.001 | <b>&lt;0.001</b> | -0.400 | 0.002 | <0.001 | <b>&lt;0.001</b> | -0.587 | 0.003 | <0.001 | <b>&lt;0.001</b> |
| IL-8 T1:SES group                    | -0.064 | 0.004 | 0.38   | 0.83             | 0.027  | 0.008 | 0.73   | 0.96             | -0.008 | 0.007 | 0.93   | 1.00             | 0.038  | 0.009 | 0.62   | 0.92             |
| Inferior Cingulum Bundle             |        |       |        |                  |        |       |        |                  |        |       |        |                  |        |       |        |                  |
| IL-8 T1                              | 0.038  | 0.002 | 0.67   | 0.99             | -0.082 | 0.003 | 0.30   | 0.63             | -0.058 | 0.003 | 0.52   | 0.78             | -0.082 | 0.003 | 0.29   | 0.73             |
| SES group                            | -0.023 | 0.003 | 0.75   | 0.95             | 0.222  | 0.003 | <0.001 | <b>&lt;0.01</b>  | 0.196  | 0.005 | 0.01   | <b>0.01</b>      | 0.193  | 0.004 | <0.01  | <b>0.01</b>      |
| Sex                                  | -0.003 | 0.003 | 0.97   | 0.97             | -0.044 | 0.003 | 0.47   | 0.70             | -0.039 | 0.004 | 0.58   | 0.58             | -0.036 | 0.003 | 0.54   | 0.98             |
| NICU stay                            | 0.064  | 0.006 | 0.42   | 0.90             | -0.008 | 0.007 | 0.91   | 0.98             | 0.028  | 0.010 | 0.73   | 0.91             | -0.026 | 0.008 | 0.70   | 0.99             |
| GA at delivery                       | -0.153 | 0.001 | 0.08   | 0.23             | 0.076  | 0.001 | 0.32   | 0.79             | -0.034 | 0.002 | 0.70   | 0.95             | 0.120  | 0.001 | 0.11   | 0.76             |
| GA at T1                             | -0.084 | 0.001 | 0.22   | 0.50             | -0.004 | 0.001 | 0.95   | 0.95             | -0.052 | 0.001 | 0.46   | 0.83             | 0.026  | 0.001 | 0.66   | 0.89             |
| PMA at scan                          | 0.423  | 0.001 | <0.001 | <b>&lt;0.001</b> | -0.605 | 0.001 | <0.001 | <b>&lt;0.001</b> | -0.321 | 0.002 | <0.001 | <b>&lt;0.001</b> | -0.645 | 0.001 | <0.001 | <b>&lt;0.001</b> |
| IL-8 T1:SES group                    | -0.030 | 0.003 | 0.74   | 0.83             | 0.130  | 0.004 | 0.10   | 0.54             | 0.116  | 0.005 | 0.20   | 0.71             | 0.115  | 0.004 | 0.14   | 0.74             |
| Fornix                               |        |       |        |                  |        |       |        |                  |        |       |        |                  |        |       |        |                  |
| IL-8 T1                              | -0.019 | 0.002 | 0.84   | 0.99             | -0.125 | 0.003 | 0.11   | 0.48             | -0.148 | 0.004 | 0.09   | 0.75             | -0.096 | 0.003 | 0.21   | 0.73             |
| SES group                            | -0.010 | 0.002 | 0.88   | 0.95             | 0.146  | 0.004 | 0.02   | <b>0.02</b>      | 0.163  | 0.005 | 0.02   | <b>0.02</b>      | 0.123  | 0.004 | 0.04   | 0.07             |
| Sex                                  | -0.072 | 0.002 | 0.30   | 0.39             | -0.019 | 0.003 | 0.74   | 0.83             | -0.043 | 0.005 | 0.51   | 0.57             | 0.003  | 0.004 | 0.96   | 0.98             |
| NICU stay                            | 0.031  | 0.005 | 0.71   | 0.90             | 0.046  | 0.008 | 0.50   | 0.98             | 0.059  | 0.011 | 0.43   | 0.91             | 0.033  | 0.008 | 0.63   | 0.99             |
| GA at delivery                       | -0.049 | 0.001 | 0.58   | 0.65             | 0.024  | 0.001 | 0.74   | 0.79             | -0.007 | 0.002 | 0.93   | 0.95             | 0.043  | 0.001 | 0.56   | 0.76             |
| GA at T1                             | -0.076 | 0.000 | 0.28   | 0.50             | 0.081  | 0.001 | 0.17   | 0.77             | 0.065  | 0.001 | 0.32   | 0.83             | 0.087  | 0.001 | 0.14   | 0.62             |

| PMA at scan              | 0.327   | 0.001 | <0.001 | <b>&lt;0.001</b> | -0.625  | 0.001 | <0.001 | <b>&lt;0.001</b> | -0.477  | 0.002 | <0.001 | <b>&lt;0.001</b> | -0.636  | 0.001 | <0.001 | <b>&lt;0.001</b> |
|--------------------------|---------|-------|--------|------------------|---------|-------|--------|------------------|---------|-------|--------|------------------|---------|-------|--------|------------------|
| IL-8 T1:SES group        | -0.076  | 0.003 | 0.40   | 0.83             | 0.098   | 0.004 | 0.20   | 0.54             | 0.062   | 0.006 | 0.46   | 1.00             | 0.106   | 0.004 | 0.17   | 0.74             |
| IL-8 Trimester 2         |         |       |        |                  |         |       |        |                  |         |       |        |                  |         |       |        |                  |
|                          | FA      |       |        |                  | MD      |       |        |                  | AD      |       |        |                  | RD      |       |        |                  |
|                          | $\beta$ | SE    | p      | q                | $\beta$ | SE    | p      | q                | $\beta$ | SE    | p      | q                | $\beta$ | SE    | p      | q                |
| Corpus Callosum          |         |       |        |                  |         |       |        |                  |         |       |        |                  |         |       |        |                  |
| IL-8 T2                  | -0.041  | 0.002 | 0.61   | 0.98             | -0.008  | 0.002 | 0.91   | 1.00             | 0.051   | 0.003 | 0.58   | 0.97             | 0.019   | 0.003 | 0.80   | 0.92             |
| SES group                | 0.034   | 0.004 | 0.59   | 0.87             | 0.005   | 0.004 | 0.93   | 0.93             | 0.093   | 0.005 | 0.21   | 0.27             | -0.015  | 0.006 | 0.80   | 0.80             |
| Sex                      | -0.088  | 0.004 | 0.15   | 0.45             | -0.026  | 0.004 | 0.66   | 0.74             | -0.093  | 0.004 | 0.19   | 0.34             | 0.032   | 0.005 | 0.58   | 0.87             |
| NICU stay                | -0.085  | 0.009 | 0.25   | 0.46             | -0.024  | 0.010 | 0.75   | 0.91             | 0.023   | 0.010 | 0.79   | 0.93             | 0.000   | 0.013 | 1.00   | 1.00             |
| GA at delivery           | 0.046   | 0.001 | 0.57   | 0.73             | -0.042  | 0.001 | 0.61   | 0.79             | 0.145   | 0.002 | 0.14   | 0.54             | -0.079  | 0.002 | 0.33   | 0.85             |
| GA at T2                 | 0.048   | 0.001 | 0.45   | 0.88             | 0.001   | 0.001 | 0.99   | 0.99             | 0.060   | 0.001 | 0.42   | 0.63             | -0.010  | 0.001 | 0.87   | 0.90             |
| PMA at scan              | 0.478   | 0.001 | <0.001 | <b>&lt;0.001</b> | -0.571  | 0.001 | <0.001 | <b>&lt;0.001</b> | -0.217  | 0.002 | 0.01   | <b>0.01</b>      | -0.563  | 0.002 | <0.001 | <b>&lt;0.001</b> |
| IL-8 T2:SES group        | -0.054  | 0.004 | 0.49   | 0.65             | 0.050   | 0.004 | 0.50   | 0.92             | -0.018  | 0.004 | 0.84   | 0.90             | 0.039   | 0.005 | 0.60   | 0.96             |
| Superior Cingulum Bundle |         |       |        |                  |         |       |        |                  |         |       |        |                  |         |       |        |                  |
| IL-8 T2                  | -0.024  | 0.002 | 0.77   | 0.98             | 0.067   | 0.003 | 0.40   | 1.00             | 0.051   | 0.004 | 0.56   | 0.97             | 0.065   | 0.004 | 0.41   | 0.92             |
| SES group                | -0.213  | 0.003 | <0.01  | <b>0.02</b>      | 0.138   | 0.006 | 0.03   | 0.07             | -0.004  | 0.007 | 0.96   | 0.96             | 0.184   | 0.007 | <0.01  | <b>0.02</b>      |
| Sex                      | -0.097  | 0.003 | 0.14   | 0.45             | 0.010   | 0.005 | 0.88   | 0.88             | -0.076  | 0.006 | 0.27   | 0.34             | 0.046   | 0.006 | 0.46   | 0.83             |
| NICU stay                | 0.030   | 0.008 | 0.72   | 0.73             | 0.050   | 0.013 | 0.53   | 0.91             | 0.064   | 0.015 | 0.45   | 0.93             | 0.032   | 0.014 | 0.68   | 0.88             |
| GA at delivery           | 0.078   | 0.001 | 0.38   | 0.57             | 0.087   | 0.002 | 0.31   | 0.79             | 0.139   | 0.002 | 0.14   | 0.54             | 0.047   | 0.002 | 0.58   | 0.85             |
| GA at T2                 | 0.016   | 0.000 | 0.81   | 0.88             | 0.008   | 0.001 | 0.91   | 0.99             | 0.036   | 0.001 | 0.61   | 0.69             | -0.008  | 0.001 | 0.90   | 0.90             |
| PMA at scan              | 0.401   | 0.001 | <0.001 | <b>&lt;0.001</b> | -0.541  | 0.002 | <0.001 | <b>&lt;0.001</b> | -0.389  | 0.002 | <0.001 | <b>&lt;0.001</b> | -0.536  | 0.002 | <0.001 | <b>&lt;0.001</b> |
| IL-8 T2:SES group        | 0.141   | 0.003 | 0.09   | 0.65             | -0.076  | 0.005 | 0.34   | 0.92             | 0.010   | 0.006 | 0.90   | 0.90             | -0.107  | 0.006 | 0.18   | 0.96             |
| Corticospinal Tract      |         |       |        |                  |         |       |        |                  |         |       |        |                  |         |       |        |                  |
| IL-8 T2                  | -0.015  | 0.002 | 0.85   | 0.98             | 0.000   | 0.003 | 1.00   | 1.00             | -0.023  | 0.003 | 0.74   | 0.97             | 0.020   | 0.004 | 0.77   | 0.92             |
| SES group                | -0.023  | 0.004 | 0.71   | 0.87             | 0.123   | 0.006 | 0.02   | 0.07             | 0.187   | 0.005 | <0.01  | <b>0.01</b>      | 0.093   | 0.007 | 0.09   | 0.15             |
| Sex                      | 0.044   | 0.004 | 0.45   | 0.81             | -0.051  | 0.005 | 0.33   | 0.74             | -0.038  | 0.004 | 0.50   | 0.50             | -0.048  | 0.006 | 0.37   | 0.83             |
| NICU stay                | -0.074  | 0.008 | 0.32   | 0.47             | 0.031   | 0.012 | 0.64   | 0.91             | 0.031   | 0.010 | 0.65   | 0.93             | 0.032   | 0.015 | 0.62   | 0.88             |
| GA at delivery           | 0.035   | 0.001 | 0.66   | 0.74             | -0.045  | 0.002 | 0.53   | 0.79             | -0.004  | 0.001 | 0.95   | 0.95             | -0.022  | 0.002 | 0.76   | 0.85             |
| GA at T2                 | 0.063   | 0.001 | 0.30   | 0.88             | -0.010  | 0.001 | 0.85   | 0.99             | 0.031   | 0.001 | 0.60   | 0.69             | -0.030  | 0.001 | 0.59   | 0.90             |
| PMA at scan              | 0.545   | 0.001 | <0.001 | <b>&lt;0.001</b> | -0.691  | 0.002 | <0.001 | <b>&lt;0.001</b> | -0.643  | 0.002 | <0.001 | <b>&lt;0.001</b> | -0.671  | 0.002 | <0.001 | <b>&lt;0.001</b> |
| IL-8 T2:SES group        | 0.032   | 0.004 | 0.67   | 0.67             | 0.023   | 0.005 | 0.73   | 0.92             | 0.065   | 0.004 | 0.36   | 0.90             | 0.002   | 0.006 | 0.98   | 0.98             |
| Optic Radiation          |         |       |        |                  |         |       |        |                  |         |       |        |                  |         |       |        |                  |
| IL-8 T2                  | -0.029  | 0.002 | 0.69   | 0.98             | 0.055   | 0.004 | 0.41   | 1.00             | 0.021   | 0.004 | 0.79   | 0.97             | 0.047   | 0.004 | 0.47   | 0.92             |
| SES group                | 0.036   | 0.004 | 0.54   | 0.87             | 0.137   | 0.006 | 0.01   | 0.05             | 0.230   | 0.006 | <0.01  | <b>0.01</b>      | 0.094   | 0.007 | 0.08   | 0.15             |
| Sex                      | -0.001  | 0.004 | 0.99   | 0.99             | -0.140  | 0.006 | 0.01   | <b>0.04</b>      | -0.214  | 0.006 | <0.01  | <b>0.01</b>      | -0.105  | 0.006 | 0.04   | 0.19             |
| NICU stay                | -0.129  | 0.009 | 0.07   | 0.46             | 0.104   | 0.013 | 0.12   | 0.91             | 0.037   | 0.014 | 0.64   | 0.93             | 0.118   | 0.015 | 0.07   | 0.60             |
| GA at delivery           | 0.017   | 0.001 | 0.83   | 0.83             | -0.091  | 0.002 | 0.20   | 0.79             | -0.088  | 0.002 | 0.32   | 0.54             | -0.080  | 0.002 | 0.25   | 0.85             |
| GA at T2                 | 0.066   | 0.001 | 0.27   | 0.88             | 0.031   | 0.001 | 0.57   | 0.99             | 0.079   | 0.001 | 0.23   | 0.42             | 0.008   | 0.001 | 0.88   | 0.90             |
| PMA at scan              | 0.554   | 0.001 | <0.001 | <b>&lt;0.001</b> | -0.623  | 0.002 | <0.001 | <b>&lt;0.001</b> | -0.359  | 0.002 | <0.001 | <b>&lt;0.001</b> | -0.649  | 0.002 | <0.001 | <b>&lt;0.001</b> |
| IL-8 T2:SES group        | 0.036   | 0.004 | 0.62   | 0.67             | -0.009  | 0.006 | 0.89   | 0.92             | 0.030   | 0.006 | 0.72   | 0.90             | -0.015  | 0.006 | 0.82   | 0.96             |
| Uncinate Fasciculus      |         |       |        |                  |         |       |        |                  |         |       |        |                  |         |       |        |                  |
| IL-8 T2                  | -0.004  | 0.002 | 0.95   | 0.98             | -0.086  | 0.003 | 0.27   | 1.00             | -0.098  | 0.004 | 0.28   | 0.97             | -0.069  | 0.003 | 0.35   | 0.92             |



|                                             |        |       |        |                  |        |       |        |                  |        |       |        |                  |        |       |        |                  |
|---------------------------------------------|--------|-------|--------|------------------|--------|-------|--------|------------------|--------|-------|--------|------------------|--------|-------|--------|------------------|
| SES group                                   | -0.041 | 0.003 | 0.49   | 0.87             | 0.110  | 0.005 | 0.08   | 0.15             | 0.095  | 0.006 | 0.19   | 0.27             | 0.098  | 0.006 | 0.10   | 0.15             |
| Sex                                         | -0.054 | 0.003 | 0.36   | 0.80             | -0.030 | 0.005 | 0.63   | 0.74             | -0.079 | 0.006 | 0.26   | 0.34             | -0.009 | 0.005 | 0.88   | 0.90             |
| NICU stay                                   | -0.035 | 0.007 | 0.63   | 0.73             | 0.009  | 0.012 | 0.91   | 0.91             | -0.021 | 0.014 | 0.81   | 0.93             | 0.021  | 0.012 | 0.77   | 0.88             |
| GA at delivery                              | 0.126  | 0.001 | 0.11   | 0.51             | 0.023  | 0.002 | 0.79   | 0.79             | 0.128  | 0.002 | 0.18   | 0.54             | -0.030 | 0.002 | 0.70   | 0.85             |
| GA at T2                                    | 0.026  | 0.000 | 0.67   | 0.88             | 0.083  | 0.001 | 0.19   | 0.99             | 0.113  | 0.001 | 0.12   | 0.42             | 0.055  | 0.001 | 0.36   | 0.90             |
| PMA at scan                                 | 0.533  | 0.001 | <0.001 | <b>&lt;0.001</b> | -0.549 | 0.002 | <0.001 | <b>&lt;0.001</b> | -0.235 | 0.002 | <0.001 | <b>&lt;0.001</b> | -0.609 | 0.002 | <0.001 | <b>&lt;0.001</b> |
| IL-8 T2:SES group                           | 0.049  | 0.003 | 0.50   | 0.65             | 0.039  | 0.005 | 0.62   | 0.92             | 0.074  | 0.006 | 0.40   | 0.90             | 0.018  | 0.005 | 0.80   | 0.96             |
| <b>Inferior Fronto-Occipital Fasciculus</b> |        |       |        |                  |        |       |        |                  |        |       |        |                  |        |       |        |                  |
| IL-8 T2                                     | 0.001  | 0.002 | 0.98   | 0.98             | -0.010 | 0.004 | 0.89   | 1.00             | -0.004 | 0.003 | 0.97   | 0.97             | -0.009 | 0.005 | 0.89   | 0.92             |
| SES group                                   | -0.005 | 0.004 | 0.93   | 0.93             | 0.082  | 0.006 | 0.14   | 0.21             | 0.157  | 0.005 | 0.02   | 0.05             | 0.063  | 0.008 | 0.25   | 0.32             |
| Sex                                         | 0.012  | 0.004 | 0.82   | 0.92             | -0.101 | 0.006 | 0.06   | 0.19             | -0.169 | 0.004 | 0.01   | <b>0.03</b>      | -0.071 | 0.007 | 0.18   | 0.53             |
| NICU stay                                   | -0.076 | 0.009 | 0.25   | 0.46             | 0.066  | 0.014 | 0.33   | 0.91             | 0.018  | 0.010 | 0.83   | 0.93             | 0.073  | 0.017 | 0.27   | 0.81             |
| GA at delivery                              | 0.082  | 0.001 | 0.25   | 0.56             | -0.024 | 0.002 | 0.75   | 0.79             | 0.069  | 0.002 | 0.44   | 0.54             | -0.045 | 0.003 | 0.53   | 0.85             |
| GA at T2                                    | 0.053  | 0.001 | 0.32   | 0.88             | 0.013  | 0.001 | 0.82   | 0.99             | 0.097  | 0.001 | 0.15   | 0.42             | -0.010 | 0.001 | 0.86   | 0.90             |
| PMA at scan                                 | 0.637  | 0.001 | <0.001 | <b>&lt;0.001</b> | -0.653 | 0.002 | <0.001 | <b>&lt;0.001</b> | -0.435 | 0.002 | <0.001 | <b>&lt;0.001</b> | -0.663 | 0.003 | <0.001 | <b>&lt;0.001</b> |
| IL-8 T2:SES group                           | 0.065  | 0.004 | 0.32   | 0.65             | -0.025 | 0.006 | 0.72   | 0.92             | 0.020  | 0.004 | 0.81   | 0.90             | -0.037 | 0.007 | 0.58   | 0.96             |
| <b>Anterior Limb of Internal Capsule</b>    |        |       |        |                  |        |       |        |                  |        |       |        |                  |        |       |        |                  |
| IL-8 T2                                     | -0.017 | 0.002 | 0.80   | 0.98             | 0.023  | 0.004 | 0.76   | 1.00             | 0.028  | 0.004 | 0.74   | 0.97             | 0.020  | 0.005 | 0.78   | 0.92             |
| SES group                                   | 0.015  | 0.003 | 0.77   | 0.87             | 0.055  | 0.008 | 0.35   | 0.40             | 0.089  | 0.006 | 0.19   | 0.27             | 0.041  | 0.008 | 0.47   | 0.53             |
| Sex                                         | -0.015 | 0.003 | 0.77   | 0.92             | -0.032 | 0.007 | 0.58   | 0.74             | -0.054 | 0.006 | 0.42   | 0.47             | -0.022 | 0.008 | 0.69   | 0.88             |
| NICU stay                                   | -0.085 | 0.007 | 0.19   | 0.46             | 0.050  | 0.016 | 0.49   | 0.91             | 0.009  | 0.014 | 0.91   | 0.93             | 0.061  | 0.018 | 0.38   | 0.85             |
| GA at delivery                              | 0.149  | 0.001 | 0.03   | 0.30             | -0.034 | 0.002 | 0.67   | 0.79             | 0.064  | 0.002 | 0.48   | 0.54             | -0.064 | 0.003 | 0.40   | 0.85             |
| GA at T2                                    | -0.010 | 0.000 | 0.86   | 0.88             | 0.054  | 0.001 | 0.37   | 0.99             | 0.087  | 0.001 | 0.20   | 0.42             | 0.042  | 0.001 | 0.46   | 0.90             |
| PMA at scan                                 | 0.619  | 0.001 | <0.001 | <b>&lt;0.001</b> | -0.596 | 0.002 | <0.001 | <b>&lt;0.001</b> | -0.439 | 0.002 | <0.001 | <b>&lt;0.001</b> | -0.622 | 0.003 | <0.001 | <b>&lt;0.001</b> |
| IL-8 T2:SES group                           | 0.048  | 0.003 | 0.46   | 0.65             | -0.034 | 0.007 | 0.64   | 0.92             | -0.024 | 0.006 | 0.78   | 0.90             | -0.036 | 0.008 | 0.61   | 0.96             |
| <b>Inferior Cingulum Bundle</b>             |        |       |        |                  |        |       |        |                  |        |       |        |                  |        |       |        |                  |
| IL-8 T2                                     | -0.062 | 0.002 | 0.46   | 0.98             | -0.020 | 0.002 | 0.78   | 1.00             | -0.066 | 0.003 | 0.44   | 0.97             | 0.007  | 0.002 | 0.92   | 0.92             |
| SES group                                   | -0.114 | 0.003 | 0.09   | 0.27             | 0.232  | 0.003 | <0.001 | <b>&lt;0.01</b>  | 0.158  | 0.005 | 0.02   | 0.05             | 0.206  | 0.004 | <0.001 | <b>&lt;0.01</b>  |
| Sex                                         | -0.039 | 0.003 | 0.55   | 0.82             | -0.173 | 0.003 | <0.01  | <b>0.02</b>      | -0.191 | 0.004 | <0.01  | <b>0.02</b>      | -0.141 | 0.003 | 0.01   | 0.09             |
| NICU stay                                   | -0.105 | 0.006 | 0.20   | 0.46             | 0.045  | 0.007 | 0.52   | 0.91             | -0.048 | 0.010 | 0.57   | 0.93             | 0.091  | 0.008 | 0.18   | 0.81             |
| GA at delivery                              | -0.118 | 0.001 | 0.18   | 0.55             | 0.041  | 0.001 | 0.59   | 0.79             | -0.071 | 0.001 | 0.44   | 0.54             | 0.098  | 0.001 | 0.19   | 0.85             |
| GA at T2                                    | 0.039  | 0.000 | 0.56   | 0.88             | 0.066  | 0.000 | 0.25   | 0.99             | 0.096  | 0.001 | 0.17   | 0.42             | 0.056  | 0.000 | 0.32   | 0.90             |
| PMA at scan                                 | 0.462  | 0.001 | <0.001 | <b>&lt;0.001</b> | -0.639 | 0.001 | <0.001 | <b>&lt;0.001</b> | -0.322 | 0.002 | <0.001 | <b>&lt;0.001</b> | -0.677 | 0.001 | <0.001 | <b>&lt;0.001</b> |
| IL-8 T2:SES group                           | 0.101  | 0.003 | 0.22   | 0.65             | 0.007  | 0.003 | 0.92   | 0.92             | 0.074  | 0.004 | 0.38   | 0.90             | -0.025 | 0.003 | 0.72   | 0.96             |
| <b>Fornix</b>                               |        |       |        |                  |        |       |        |                  |        |       |        |                  |        |       |        |                  |
| IL-8 T2                                     | -0.029 | 0.001 | 0.73   | 0.98             | 0.005  | 0.002 | 0.94   | 1.00             | -0.012 | 0.003 | 0.88   | 0.97             | 0.016  | 0.002 | 0.82   | 0.92             |
| SES group                                   | -0.162 | 0.002 | 0.02   | 0.08             | 0.078  | 0.004 | 0.18   | 0.24             | 0.010  | 0.005 | 0.88   | 0.96             | 0.115  | 0.004 | 0.05   | 0.14             |
| Sex                                         | -0.113 | 0.002 | 0.09   | 0.45             | -0.034 | 0.004 | 0.55   | 0.74             | -0.087 | 0.005 | 0.18   | 0.34             | 0.007  | 0.004 | 0.90   | 0.90             |
| NICU stay                                   | 0.028  | 0.005 | 0.73   | 0.73             | -0.016 | 0.008 | 0.82   | 0.91             | -0.007 | 0.011 | 0.93   | 0.93             | -0.019 | 0.008 | 0.78   | 0.88             |
| GA at delivery                              | 0.086  | 0.001 | 0.34   | 0.57             | 0.025  | 0.001 | 0.75   | 0.79             | 0.079  | 0.002 | 0.37   | 0.54             | -0.008 | 0.001 | 0.92   | 0.92             |
| GA at T2                                    | 0.010  | 0.000 | 0.88   | 0.88             | -0.017 | 0.000 | 0.77   | 0.99             | -0.019 | 0.001 | 0.77   | 0.77             | -0.014 | 0.001 | 0.81   | 0.90             |
| PMA at scan                                 | 0.386  | 0.001 | <0.001 | <b>&lt;0.001</b> | -0.646 | 0.001 | <0.001 | <b>&lt;0.001</b> | -0.481 | 0.002 | <0.001 | <b>&lt;0.001</b> | -0.659 | 0.001 | <0.001 | <b>&lt;0.001</b> |
| IL-8 T2:SES group                           | 0.081  | 0.002 | 0.33   | 0.65             | 0.020  | 0.003 | 0.79   | 0.92             | 0.068  | 0.005 | 0.41   | 0.90             | -0.013 | 0.004 | 0.85   | 0.96             |

### IL-8 Trimester 3

|                                 | FA      |       |        |                  | MD      |       |        |                  | AD      |       |        |                  | RD      |       |        |                  |
|---------------------------------|---------|-------|--------|------------------|---------|-------|--------|------------------|---------|-------|--------|------------------|---------|-------|--------|------------------|
|                                 | $\beta$ | SE    | $p$    | $q$              | $\beta$ | SE    | $p$    | $q$              | $\beta$ | SE    | $p$    | $q$              | $\beta$ | SE    | $p$    | $q$              |
| <b>Corpus Callosum</b>          |         |       |        |                  |         |       |        |                  |         |       |        |                  |         |       |        |                  |
| IL-8 T3                         | 0.011   | 0.002 | 0.87   | 0.93             | 0.016   | 0.002 | 0.81   | 0.81             | 0.018   | 0.002 | 0.82   | 0.88             | 0.023   | 0.003 | 0.73   | 0.88             |
| SES group                       | 0.104   | 0.004 | 0.08   | 0.24             | 0.005   | 0.004 | 0.93   | 0.93             | 0.188   | 0.004 | 0.01   | <b>0.01</b>      | -0.042  | 0.005 | 0.45   | 0.45             |
| Sex                             | -0.127  | 0.003 | 0.02   | 0.20             | -0.006  | 0.004 | 0.92   | 0.99             | -0.095  | 0.004 | 0.13   | 0.24             | 0.060   | 0.005 | 0.25   | 0.75             |
| NICU stay                       | -0.048  | 0.009 | 0.45   | 0.65             | -0.022  | 0.010 | 0.72   | 0.96             | 0.004   | 0.010 | 0.96   | 0.96             | -0.002  | 0.013 | 0.97   | 0.97             |
| GA at delivery                  | -0.025  | 0.002 | 0.72   | 0.83             | 0.000   | 0.002 | 1.00   | 1.00             | 0.032   | 0.002 | 0.70   | 0.95             | -0.008  | 0.002 | 0.91   | 0.99             |
| GA at T3                        | 0.023   | 0.001 | 0.70   | 0.88             | -0.031  | 0.001 | 0.59   | 0.66             | -0.034  | 0.001 | 0.62   | 0.64             | -0.040  | 0.001 | 0.49   | 0.73             |
| PMA at scan                     | 0.465   | 0.001 | <0.001 | <b>&lt;0.001</b> | -0.561  | 0.001 | <0.001 | <b>&lt;0.001</b> | -0.165  | 0.002 | 0.02   | <b>0.02</b>      | -0.556  | 0.002 | <0.001 | <b>&lt;0.001</b> |
| IL-8 T3:SES group               | -0.032  | 0.003 | 0.65   | 0.84             | -0.051  | 0.004 | 0.45   | 0.98             | -0.068  | 0.004 | 0.40   | 0.89             | -0.034  | 0.005 | 0.60   | 0.99             |
| <b>Superior Cingulum Bundle</b> |         |       |        |                  |         |       |        |                  |         |       |        |                  |         |       |        |                  |
| IL-8 T3                         | -0.059  | 0.002 | 0.44   | 0.93             | 0.030   | 0.003 | 0.67   | 0.81             | -0.019  | 0.003 | 0.80   | 0.88             | 0.059   | 0.003 | 0.41   | 0.88             |
| SES group                       | -0.134  | 0.003 | 0.04   | 0.17             | 0.157   | 0.005 | 0.01   | <b>0.01</b>      | 0.062   | 0.006 | 0.32   | 0.32             | 0.175   | 0.006 | <0.01  | <b>0.01</b>      |
| Sex                             | -0.090  | 0.003 | 0.13   | 0.30             | -0.022  | 0.005 | 0.69   | 0.98             | -0.105  | 0.005 | 0.07   | 0.17             | 0.017   | 0.005 | 0.76   | 0.91             |
| NICU stay                       | -0.045  | 0.008 | 0.52   | 0.65             | -0.012  | 0.013 | 0.86   | 0.96             | -0.056  | 0.015 | 0.42   | 0.54             | 0.008   | 0.015 | 0.91   | 0.97             |
| GA at delivery                  | 0.027   | 0.001 | 0.74   | 0.83             | 0.054   | 0.002 | 0.47   | 0.78             | 0.071   | 0.002 | 0.37   | 0.84             | 0.036   | 0.002 | 0.63   | 0.95             |
| GA at T3                        | -0.022  | 0.001 | 0.74   | 0.88             | -0.034  | 0.001 | 0.58   | 0.66             | -0.055  | 0.001 | 0.39   | 0.64             | -0.020  | 0.001 | 0.74   | 0.84             |
| PMA at scan                     | 0.316   | 0.001 | <0.001 | <b>&lt;0.001</b> | -0.511  | 0.002 | <0.001 | <b>&lt;0.001</b> | -0.398  | 0.002 | <0.001 | <b>&lt;0.001</b> | -0.486  | 0.002 | <0.001 | <b>&lt;0.001</b> |
| IL-8 T3:SES group               | 0.006   | 0.003 | 0.93   | 0.99             | 0.013   | 0.005 | 0.85   | 0.98             | 0.045   | 0.006 | 0.55   | 0.91             | -0.010  | 0.006 | 0.88   | 0.99             |
| <b>Corticospinal Tract</b>      |         |       |        |                  |         |       |        |                  |         |       |        |                  |         |       |        |                  |
| IL-8 T3                         | 0.021   | 0.002 | 0.75   | 0.93             | 0.041   | 0.003 | 0.48   | 0.81             | 0.087   | 0.002 | 0.18   | 0.82             | 0.017   | 0.003 | 0.78   | 0.88             |
| SES group                       | 0.030   | 0.003 | 0.59   | 0.82             | 0.145   | 0.005 | <0.01  | <b>0.01</b>      | 0.282   | 0.004 | <0.001 | <b>&lt;0.001</b> | 0.090   | 0.006 | 0.07   | 0.08             |
| Sex                             | -0.021  | 0.003 | 0.68   | 0.80             | -0.031  | 0.004 | 0.49   | 0.89             | -0.066  | 0.004 | 0.19   | 0.29             | -0.014  | 0.005 | 0.76   | 0.91             |
| NICU stay                       | -0.054  | 0.008 | 0.37   | 0.65             | 0.002   | 0.012 | 0.97   | 0.96             | -0.063  | 0.010 | 0.29   | 0.45             | 0.013   | 0.014 | 0.80   | 0.97             |
| GA at delivery                  | -0.010  | 0.001 | 0.88   | 0.88             | -0.040  | 0.002 | 0.52   | 0.78             | -0.072  | 0.002 | 0.29   | 0.84             | 0.000   | 0.002 | 0.99   | 0.99             |
| GA at T3                        | 0.095   | 0.001 | 0.09   | 0.80             | -0.094  | 0.001 | 0.06   | 0.54             | -0.059  | 0.001 | 0.29   | 0.64             | -0.098  | 0.001 | 0.05   | 0.49             |
| PMA at scan                     | 0.549   | 0.001 | <0.001 | <b>&lt;0.001</b> | -0.659  | 0.002 | <0.001 | <b>&lt;0.001</b> | -0.542  | 0.001 | <0.001 | <b>&lt;0.001</b> | -0.656  | 0.002 | <0.001 | <b>&lt;0.001</b> |
| IL-8 T3:SES group               | -0.134  | 0.003 | 0.04   | 0.35             | 0.037   | 0.004 | 0.52   | 0.98             | -0.076  | 0.004 | 0.23   | 0.70             | 0.078   | 0.005 | 0.19   | 0.99             |
| <b>Optic Radiation</b>          |         |       |        |                  |         |       |        |                  |         |       |        |                  |         |       |        |                  |
| IL-8 T3                         | 0.010   | 0.002 | 0.88   | 0.93             | 0.079   | 0.003 | 0.21   | 0.81             | 0.063   | 0.003 | 0.39   | 0.87             | 0.057   | 0.004 | 0.37   | 0.88             |
| SES group                       | 0.091   | 0.004 | 0.11   | 0.24             | 0.191   | 0.006 | <0.001 | <b>&lt;0.01</b>  | 0.339   | 0.006 | <0.001 | <b>&lt;0.001</b> | 0.119   | 0.007 | 0.02   | <b>0.04</b>      |
| Sex                             | 0.008   | 0.003 | 0.88   | 0.88             | -0.100  | 0.005 | 0.04   | 0.34             | -0.150  | 0.005 | 0.01   | 0.07             | -0.075  | 0.006 | 0.12   | 0.55             |
| NICU stay                       | -0.114  | 0.009 | 0.07   | 0.60             | 0.024   | 0.014 | 0.68   | 0.96             | -0.070  | 0.014 | 0.30   | 0.45             | 0.055   | 0.016 | 0.34   | 0.97             |
| GA at delivery                  | -0.053  | 0.001 | 0.46   | 0.83             | -0.075  | 0.002 | 0.26   | 0.78             | -0.144  | 0.002 | 0.06   | 0.55             | -0.039  | 0.003 | 0.55   | 0.95             |
| GA at T3                        | 0.015   | 0.001 | 0.79   | 0.88             | -0.039  | 0.001 | 0.47   | 0.66             | -0.029  | 0.001 | 0.64   | 0.64             | -0.038  | 0.001 | 0.48   | 0.73             |
| PMA at scan                     | 0.548   | 0.001 | <0.001 | <b>&lt;0.001</b> | -0.560  | 0.002 | <0.001 | <b>&lt;0.001</b> | -0.270  | 0.002 | <0.001 | <b>&lt;0.001</b> | -0.602  | 0.002 | <0.001 | <b>&lt;0.001</b> |
| IL-8 T3:SES group               | -0.052  | 0.003 | 0.43   | 0.71             | 0.013   | 0.005 | 0.84   | 0.98             | 0.005   | 0.005 | 0.95   | 0.95             | 0.026   | 0.006 | 0.67   | 0.99             |
| <b>Uncinate Fasciculus</b>      |         |       |        |                  |         |       |        |                  |         |       |        |                  |         |       |        |                  |
| IL-8 T3                         | 0.054   | 0.002 | 0.43   | 0.93             | 0.039   | 0.003 | 0.58   | 0.81             | 0.066   | 0.003 | 0.39   | 0.87             | 0.015   | 0.003 | 0.83   | 0.88             |
| SES group                       | -0.027  | 0.003 | 0.64   | 0.82             | 0.166   | 0.005 | <0.01  | <b>0.01</b>      | 0.159   | 0.006 | 0.01   | <b>0.02</b>      | 0.141   | 0.005 | 0.01   | <b>0.03</b>      |
| Sex                             | -0.086  | 0.003 | 0.11   | 0.30             | -0.049  | 0.004 | 0.36   | 0.81             | -0.118  | 0.005 | 0.05   | 0.14             | -0.012  | 0.005 | 0.81   | 0.91             |

|                                             |        |       |        |                  |        |       |        |                  |        |       |        |                  |        |       |        |                  |
|---------------------------------------------|--------|-------|--------|------------------|--------|-------|--------|------------------|--------|-------|--------|------------------|--------|-------|--------|------------------|
| NICU stay                                   | -0.035 | 0.007 | 0.58   | 0.65             | -0.134 | 0.012 | 0.04   | 0.33             | -0.172 | 0.014 | 0.02   | 0.14             | -0.092 | 0.013 | 0.13   | 0.97             |
| GA at delivery                              | 0.145  | 0.001 | 0.04   | 0.40             | 0.014  | 0.002 | 0.85   | 1.00             | 0.113  | 0.002 | 0.16   | 0.74             | -0.039 | 0.002 | 0.58   | 0.95             |
| GA at T3                                    | -0.009 | 0.001 | 0.88   | 0.88             | -0.049 | 0.001 | 0.41   | 0.66             | -0.050 | 0.001 | 0.44   | 0.64             | -0.040 | 0.001 | 0.48   | 0.73             |
| PMA at scan                                 | 0.470  | 0.001 | <0.001 | <b>&lt;0.001</b> | -0.514 | 0.002 | <0.001 | <b>&lt;0.001</b> | -0.242 | 0.002 | <0.01  | <b>0.02</b>      | -0.567 | 0.002 | <0.001 | <b>&lt;0.001</b> |
| IL-8 T3:SES group                           | -0.048 | 0.003 | 0.48   | 0.71             | -0.081 | 0.004 | 0.24   | 0.98             | -0.121 | 0.005 | 0.11   | 0.51             | -0.046 | 0.005 | 0.48   | 0.99             |
| <b>Inferior Fronto-Occipital Fasciculus</b> |        |       |        |                  |        |       |        |                  |        |       |        |                  |        |       |        |                  |
| IL-8 T3                                     | -0.013 | 0.002 | 0.83   | 0.93             | 0.028  | 0.003 | 0.65   | 0.81             | 0.041  | 0.003 | 0.57   | 0.88             | 0.023  | 0.004 | 0.71   | 0.88             |
| SES group                                   | 0.016  | 0.004 | 0.76   | 0.85             | 0.135  | 0.005 | 0.01   | <b>0.01</b>      | 0.259  | 0.004 | <0.001 | <b>&lt;0.001</b> | 0.093  | 0.007 | 0.07   | 0.08             |
| Sex                                         | -0.020 | 0.003 | 0.68   | 0.80             | -0.076 | 0.005 | 0.11   | 0.34             | -0.137 | 0.004 | 0.02   | 0.07             | -0.046 | 0.006 | 0.33   | 0.75             |
| NICU stay                                   | -0.052 | 0.009 | 0.36   | 0.65             | -0.032 | 0.013 | 0.57   | 0.96             | -0.100 | 0.011 | 0.13   | 0.32             | -0.005 | 0.016 | 0.93   | 0.97             |
| GA at delivery                              | 0.053  | 0.001 | 0.42   | 0.83             | -0.045 | 0.002 | 0.49   | 0.78             | -0.001 | 0.002 | 0.99   | 0.99             | -0.050 | 0.003 | 0.44   | 0.95             |
| GA at T3                                    | 0.046  | 0.001 | 0.38   | 0.80             | -0.050 | 0.001 | 0.34   | 0.66             | -0.034 | 0.001 | 0.58   | 0.64             | -0.052 | 0.001 | 0.31   | 0.73             |
| PMA at scan                                 | 0.603  | 0.001 | <0.001 | <b>&lt;0.001</b> | -0.629 | 0.002 | <0.001 | <b>&lt;0.001</b> | -0.398 | 0.002 | <0.001 | <b>&lt;0.001</b> | -0.642 | 0.002 | <0.001 | <b>&lt;0.001</b> |
| IL-8 T3:SES group                           | -0.046 | 0.003 | 0.45   | 0.71             | 0.007  | 0.005 | 0.91   | 0.98             | -0.037 | 0.004 | 0.61   | 0.91             | 0.019  | 0.006 | 0.75   | 0.99             |
| <b>Anterior Limb of Internal Capsule</b>    |        |       |        |                  |        |       |        |                  |        |       |        |                  |        |       |        |                  |
| IL-8 T3                                     | -0.006 | 0.002 | 0.93   | 0.93             | 0.023  | 0.004 | 0.72   | 0.81             | -0.011 | 0.003 | 0.88   | 0.88             | 0.024  | 0.004 | 0.70   | 0.88             |
| SES group                                   | 0.009  | 0.003 | 0.86   | 0.86             | 0.132  | 0.007 | 0.02   | <b>0.02</b>      | 0.189  | 0.006 | <0.01  | <b>&lt;0.01</b>  | 0.103  | 0.008 | 0.05   | 0.07             |
| Sex                                         | -0.047 | 0.003 | 0.32   | 0.58             | -0.015 | 0.006 | 0.77   | 0.98             | -0.040 | 0.005 | 0.48   | 0.48             | -0.002 | 0.007 | 0.96   | 0.96             |
| NICU stay                                   | -0.017 | 0.007 | 0.75   | 0.75             | -0.063 | 0.016 | 0.29   | 0.96             | -0.113 | 0.014 | 0.09   | 0.32             | -0.042 | 0.018 | 0.46   | 0.97             |
| GA at delivery                              | 0.095  | 0.001 | 0.14   | 0.62             | -0.045 | 0.003 | 0.51   | 0.78             | 0.018  | 0.002 | 0.81   | 0.95             | -0.060 | 0.003 | 0.37   | 0.95             |
| GA at T3                                    | 0.056  | 0.001 | 0.28   | 0.80             | -0.071 | 0.001 | 0.20   | 0.66             | -0.059 | 0.001 | 0.35   | 0.64             | -0.070 | 0.001 | 0.19   | 0.73             |
| PMA at scan                                 | 0.598  | 0.001 | <0.001 | <b>&lt;0.001</b> | -0.588 | 0.002 | <0.001 | <b>&lt;0.001</b> | -0.444 | 0.002 | <0.001 | <b>&lt;0.001</b> | -0.611 | 0.003 | <0.001 | <b>&lt;0.001</b> |
| IL-8 T3:SES group                           | -0.057 | 0.003 | 0.34   | 0.71             | 0.002  | 0.006 | 0.98   | 0.98             | -0.017 | 0.005 | 0.81   | 0.92             | 0.014  | 0.007 | 0.82   | 0.99             |
| <b>Inferior Cingulum Bundle</b>             |        |       |        |                  |        |       |        |                  |        |       |        |                  |        |       |        |                  |
| IL-8 T3                                     | -0.145 | 0.001 | 0.05   | 0.49             | -0.056 | 0.002 | 0.39   | 0.81             | -0.154 | 0.002 | 0.04   | 0.39             | 0.010  | 0.002 | 0.88   | 0.88             |
| SES group                                   | -0.031 | 0.003 | 0.62   | 0.82             | 0.210  | 0.003 | <0.001 | <b>&lt;0.01</b>  | 0.192  | 0.004 | <0.01  | <b>&lt;0.01</b>  | 0.159  | 0.003 | <0.01  | <b>0.01</b>      |
| Sex                                         | 0.021  | 0.002 | 0.72   | 0.80             | -0.089 | 0.003 | 0.08   | 0.34             | -0.055 | 0.004 | 0.35   | 0.40             | -0.091 | 0.003 | 0.07   | 0.55             |
| NICU stay                                   | -0.094 | 0.006 | 0.18   | 0.65             | -0.039 | 0.007 | 0.51   | 0.96             | -0.103 | 0.010 | 0.14   | 0.32             | 0.025  | 0.008 | 0.68   | 0.97             |
| GA at delivery                              | -0.066 | 0.001 | 0.41   | 0.83             | 0.077  | 0.001 | 0.26   | 0.78             | 0.016  | 0.002 | 0.84   | 0.95             | 0.106  | 0.001 | 0.12   | 0.95             |
| GA at T3                                    | -0.049 | 0.000 | 0.45   | 0.80             | -0.037 | 0.001 | 0.50   | 0.66             | -0.076 | 0.001 | 0.24   | 0.64             | -0.001 | 0.001 | 0.99   | 0.99             |
| PMA at scan                                 | 0.387  | 0.001 | <0.001 | <b>&lt;0.001</b> | -0.624 | 0.001 | <0.001 | <b>&lt;0.001</b> | -0.343 | 0.001 | <0.001 | <b>&lt;0.001</b> | -0.639 | 0.001 | <0.001 | <b>&lt;0.001</b> |
| IL-8 T3:SES group                           | 0.106  | 0.002 | 0.16   | 0.71             | 0.069  | 0.003 | 0.28   | 0.98             | 0.140  | 0.004 | 0.06   | 0.51             | 0.006  | 0.003 | 0.93   | 0.99             |
| <b>Fornix</b>                               |        |       |        |                  |        |       |        |                  |        |       |        |                  |        |       |        |                  |
| IL-8 T3                                     | -0.022 | 0.001 | 0.77   | 0.93             | 0.046  | 0.002 | 0.48   | 0.81             | 0.020  | 0.003 | 0.79   | 0.88             | 0.055  | 0.002 | 0.39   | 0.88             |
| SES group                                   | -0.136 | 0.002 | 0.03   | 0.17             | 0.139  | 0.003 | 0.01   | <b>0.01</b>      | 0.083  | 0.005 | 0.18   | 0.20             | 0.159  | 0.003 | <0.01  | <b>0.01</b>      |
| Sex                                         | -0.115 | 0.002 | 0.05   | 0.23             | 0.001  | 0.003 | 0.99   | 0.99             | -0.057 | 0.004 | 0.32   | 0.40             | 0.037  | 0.003 | 0.45   | 0.81             |
| NICU stay                                   | -0.053 | 0.005 | 0.44   | 0.65             | -0.014 | 0.008 | 0.81   | 0.96             | -0.047 | 0.011 | 0.48   | 0.54             | 0.006  | 0.008 | 0.92   | 0.97             |
| GA at delivery                              | 0.037  | 0.001 | 0.64   | 0.83             | 0.007  | 0.001 | 0.92   | 1.00             | 0.026  | 0.002 | 0.73   | 0.95             | -0.004 | 0.001 | 0.95   | 0.99             |
| GA at T3                                    | -0.050 | 0.000 | 0.43   | 0.80             | 0.000  | 0.001 | 1.00   | 1.00             | -0.040 | 0.001 | 0.53   | 0.64             | 0.019  | 0.001 | 0.73   | 0.84             |
| PMA at scan                                 | 0.349  | 0.001 | <0.001 | <b>&lt;0.001</b> | -0.613 | 0.001 | <0.001 | <b>&lt;0.001</b> | -0.461 | 0.002 | <0.001 | <b>&lt;0.001</b> | -0.626 | 0.001 | <0.001 | <b>&lt;0.001</b> |
| IL-8 T3:SES group                           | 0.001  | 0.002 | 0.99   | 0.99             | 0.006  | 0.003 | 0.93   | 0.98             | 0.017  | 0.004 | 0.82   | 0.92             | 0.001  | 0.003 | 0.99   | 0.99             |
| <b>IL-10 Trimester 1</b>                    |        |       |        |                  |        |       |        |                  |        |       |        |                  |        |       |        |                  |

FA

MD

AD

RD

|                                 | $\beta$ | SE    | $p$    | $q$              | $\beta$ | SE    | $p$    | $q$              | $\beta$ | SE    | $p$    | $q$              | $\beta$ | SE    | $p$    | $q$              |
|---------------------------------|---------|-------|--------|------------------|---------|-------|--------|------------------|---------|-------|--------|------------------|---------|-------|--------|------------------|
| <b>Corpus Callosum</b>          |         |       |        |                  |         |       |        |                  |         |       |        |                  |         |       |        |                  |
| IL-10 T1                        | 0.063   | 0.003 | 0.46   | 0.93             | -0.069  | 0.003 | 0.41   | 0.93             | -0.020  | 0.003 | 0.84   | 0.94             | -0.073  | 0.004 | 0.37   | 0.86             |
| SES group                       | 0.150   | 0.004 | 0.02   | 0.20             | -0.027  | 0.004 | 0.67   | 0.67             | 0.191   | 0.005 | 0.01   | <b>0.02</b>      | -0.102  | 0.005 | 0.11   | 0.12             |
| Sex                             | -0.150  | 0.004 | 0.02   | 0.09             | 0.086   | 0.004 | 0.17   | 0.84             | -0.067  | 0.005 | 0.36   | 0.65             | 0.129   | 0.005 | 0.04   | 0.32             |
| NICU stay                       | 0.019   | 0.009 | 0.79   | 0.98             | -0.057  | 0.009 | 0.42   | 0.85             | 0.083   | 0.010 | 0.31   | 0.84             | -0.073  | 0.012 | 0.30   | 0.79             |
| GA at delivery                  | -0.048  | 0.002 | 0.54   | 0.61             | 0.063   | 0.002 | 0.41   | 0.74             | -0.024  | 0.002 | 0.79   | 0.95             | 0.055   | 0.002 | 0.46   | 0.74             |
| GA at T1                        | -0.075  | 0.001 | 0.24   | 0.64             | 0.095   | 0.001 | 0.13   | 0.90             | 0.030   | 0.001 | 0.68   | 0.81             | 0.098   | 0.001 | 0.11   | 0.76             |
| PMA at scan                     | 0.463   | 0.002 | <0.001 | <b>&lt;0.001</b> | -0.538  | 0.002 | <0.001 | <b>&lt;0.001</b> | -0.090  | 0.002 | 0.27   | 0.27             | -0.540  | 0.002 | <0.001 | <b>&lt;0.001</b> |
| IL-10 T1:SES group              | -0.093  | 0.004 | 0.29   | 0.86             | 0.124   | 0.004 | 0.15   | 0.57             | 0.088   | 0.005 | 0.38   | 0.76             | 0.112   | 0.006 | 0.18   | 0.55             |
| <b>Superior Cingulum Bundle</b> |         |       |        |                  |         |       |        |                  |         |       |        |                  |         |       |        |                  |
| IL-10 T1                        | 0.001   | 0.003 | 0.99   | 0.99             | -0.039  | 0.004 | 0.66   | 0.96             | -0.032  | 0.005 | 0.74   | 0.94             | -0.026  | 0.005 | 0.76   | 0.86             |
| SES group                       | -0.135  | 0.004 | 0.06   | 0.27             | 0.171   | 0.006 | 0.01   | <b>0.02</b>      | 0.076   | 0.007 | 0.29   | 0.29             | 0.187   | 0.007 | 0.01   | <b>0.04</b>      |
| Sex                             | -0.116  | 0.004 | 0.10   | 0.29             | -0.029  | 0.006 | 0.65   | 0.84             | -0.124  | 0.007 | 0.08   | 0.17             | 0.014   | 0.006 | 0.82   | 0.91             |
| NICU stay                       | 0.032   | 0.008 | 0.69   | 0.98             | 0.036   | 0.012 | 0.62   | 0.85             | 0.046   | 0.015 | 0.56   | 0.84             | 0.020   | 0.014 | 0.79   | 0.79             |
| GA at delivery                  | 0.151   | 0.001 | 0.08   | 0.27             | -0.033  | 0.002 | 0.67   | 0.74             | 0.070   | 0.003 | 0.41   | 0.95             | -0.083  | 0.002 | 0.29   | 0.74             |
| GA at T1                        | -0.017  | 0.001 | 0.81   | 0.89             | -0.017  | 0.001 | 0.80   | 0.90             | -0.043  | 0.001 | 0.54   | 0.81             | -0.008  | 0.001 | 0.91   | 0.96             |
| PMA at scan                     | 0.294   | 0.001 | <0.001 | <b>&lt;0.001</b> | -0.493  | 0.002 | <0.001 | <b>&lt;0.001</b> | -0.385  | 0.003 | <0.001 | <b>&lt;0.001</b> | -0.470  | 0.002 | <0.001 | <b>&lt;0.001</b> |
| IL-10 T1:SES group              | 0.001   | 0.004 | 0.99   | 0.99             | 0.059   | 0.006 | 0.51   | 0.57             | 0.063   | 0.007 | 0.51   | 0.76             | 0.040   | 0.007 | 0.65   | 0.73             |
| <b>Corticospinal Tract</b>      |         |       |        |                  |         |       |        |                  |         |       |        |                  |         |       |        |                  |
| IL-10 T1                        | -0.031  | 0.003 | 0.71   | 0.93             | 0.007   | 0.004 | 0.92   | 0.96             | -0.017  | 0.003 | 0.83   | 0.94             | 0.013   | 0.004 | 0.86   | 0.86             |
| SES group                       | 0.084   | 0.004 | 0.20   | 0.60             | 0.105   | 0.005 | 0.07   | 0.08             | 0.247   | 0.004 | <0.001 | <b>&lt;0.001</b> | 0.047   | 0.006 | 0.43   | 0.43             |
| Sex                             | -0.082  | 0.003 | 0.20   | 0.36             | 0.030   | 0.005 | 0.60   | 0.84             | -0.016  | 0.004 | 0.78   | 0.78             | 0.045   | 0.006 | 0.43   | 0.91             |
| NICU stay                       | 0.108   | 0.008 | 0.14   | 0.98             | 0.012   | 0.011 | 0.85   | 0.85             | 0.097   | 0.010 | 0.15   | 0.84             | -0.019  | 0.013 | 0.77   | 0.79             |
| GA at delivery                  | -0.027  | 0.001 | 0.73   | 0.73             | 0.023   | 0.002 | 0.74   | 0.74             | 0.010   | 0.002 | 0.89   | 0.95             | 0.025   | 0.002 | 0.72   | 0.81             |
| GA at T1                        | 0.023   | 0.001 | 0.72   | 0.89             | 0.020   | 0.001 | 0.71   | 0.90             | 0.057   | 0.001 | 0.34   | 0.81             | 0.006   | 0.001 | 0.91   | 0.96             |
| PMA at scan                     | 0.522   | 0.001 | <0.001 | <b>&lt;0.001</b> | -0.668  | 0.002 | <0.001 | <b>&lt;0.001</b> | -0.555  | 0.002 | <0.001 | <b>&lt;0.001</b> | -0.655  | 0.002 | <0.001 | <b>&lt;0.001</b> |
| IL-10 T1:SES group              | 0.008   | 0.004 | 0.93   | 0.99             | 0.086   | 0.005 | 0.26   | 0.57             | 0.131   | 0.005 | 0.11   | 0.76             | 0.065   | 0.007 | 0.41   | 0.66             |
| <b>Optic Radiation</b>          |         |       |        |                  |         |       |        |                  |         |       |        |                  |         |       |        |                  |
| IL-10 T1                        | -0.030  | 0.003 | 0.72   | 0.93             | 0.039   | 0.005 | 0.64   | 0.96             | 0.018   | 0.004 | 0.84   | 0.94             | 0.045   | 0.005 | 0.58   | 0.86             |
| SES group                       | 0.063   | 0.004 | 0.32   | 0.73             | 0.189   | 0.007 | <0.01  | <b>0.01</b>      | 0.302   | 0.006 | <0.001 | <b>&lt;0.001</b> | 0.133   | 0.007 | 0.03   | 0.09             |
| Sex                             | -0.083  | 0.004 | 0.18   | 0.36             | -0.062  | 0.006 | 0.32   | 0.84             | -0.164  | 0.006 | 0.02   | 0.06             | -0.024  | 0.007 | 0.69   | 0.91             |
| NICU stay                       | -0.078  | 0.008 | 0.27   | 0.98             | 0.041   | 0.014 | 0.56   | 0.85             | 0.009   | 0.014 | 0.91   | 0.98             | 0.052   | 0.016 | 0.44   | 0.79             |
| GA at delivery                  | -0.104  | 0.001 | 0.17   | 0.31             | -0.027  | 0.002 | 0.72   | 0.74             | -0.104  | 0.002 | 0.21   | 0.94             | 0.006   | 0.003 | 0.94   | 0.94             |
| GA at T1                        | -0.009  | 0.001 | 0.89   | 0.89             | -0.003  | 0.001 | 0.97   | 0.97             | 0.018   | 0.001 | 0.79   | 0.81             | 0.003   | 0.002 | 0.96   | 0.96             |
| PMA at scan                     | 0.556   | 0.001 | <0.001 | <b>&lt;0.001</b> | -0.559  | 0.002 | <0.001 | <b>&lt;0.001</b> | -0.293  | 0.002 | <0.001 | <b>&lt;0.001</b> | -0.603  | 0.003 | <0.001 | <b>&lt;0.001</b> |
| IL-10 T1:SES group              | 0.010   | 0.004 | 0.91   | 0.99             | -0.006  | 0.007 | 0.94   | 0.94             | 0.018   | 0.007 | 0.84   | 0.86             | -0.015  | 0.008 | 0.85   | 0.85             |
| <b>Uncinate Fasciculus</b>      |         |       |        |                  |         |       |        |                  |         |       |        |                  |         |       |        |                  |
| IL-10 T1                        | 0.172   | 0.002 | 0.04   | 0.35             | -0.151  | 0.004 | 0.07   | 0.66             | -0.055  | 0.005 | 0.56   | 0.94             | -0.176  | 0.004 | 0.03   | 0.27             |
| SES group                       | 0.013   | 0.003 | 0.83   | 0.92             | 0.154   | 0.005 | 0.02   | <b>0.03</b>      | 0.184   | 0.006 | 0.01   | <b>0.02</b>      | 0.115   | 0.006 | 0.06   | 0.09             |
| Sex                             | -0.156  | 0.003 | 0.01   | 0.09             | -0.051  | 0.005 | 0.41   | 0.84             | -0.169  | 0.006 | 0.02   | 0.06             | 0.007   | 0.006 | 0.91   | 0.91             |
| NICU stay                       | -0.002  | 0.007 | 0.98   | 0.98             | 0.014   | 0.011 | 0.84   | 0.85             | -0.002  | 0.014 | 0.98   | 0.98             | 0.022   | 0.012 | 0.75   | 0.79             |
| GA at delivery                  | 0.105   | 0.001 | 0.17   | 0.31             | 0.094   | 0.002 | 0.22   | 0.74             | 0.177   | 0.002 | 0.04   | 0.37             | 0.038   | 0.002 | 0.60   | 0.78             |



|                                 |        |       |        |                  |        |       |        |                  |        |       |        |                  |        |       |        |                  |
|---------------------------------|--------|-------|--------|------------------|--------|-------|--------|------------------|--------|-------|--------|------------------|--------|-------|--------|------------------|
| IL-10 T2                        | -0.083 | 0.002 | 0.26   | 0.41             | 0.087  | 0.002 | 0.22   | 0.56             | -0.059 | 0.003 | 0.50   | 0.91             | 0.110  | 0.003 | 0.11   | 0.33             |
| SES group                       | 0.030  | 0.004 | 0.63   | 0.81             | 0.007  | 0.004 | 0.91   | 0.91             | 0.082  | 0.005 | 0.27   | 0.35             | -0.015 | 0.005 | 0.80   | 0.80             |
| Sex                             | -0.089 | 0.004 | 0.14   | 0.63             | -0.009 | 0.004 | 0.88   | 0.88             | -0.101 | 0.004 | 0.16   | 0.28             | 0.042  | 0.005 | 0.46   | 0.68             |
| NICU stay                       | -0.043 | 0.009 | 0.56   | 0.79             | -0.061 | 0.009 | 0.41   | 0.92             | 0.018  | 0.010 | 0.84   | 0.95             | -0.051 | 0.012 | 0.48   | 0.87             |
| GA at delivery                  | 0.098  | 0.001 | 0.22   | 0.46             | -0.083 | 0.001 | 0.30   | 0.79             | 0.132  | 0.002 | 0.19   | 0.51             | -0.134 | 0.002 | 0.09   | 0.40             |
| GA at T2                        | 0.077  | 0.001 | 0.21   | 0.64             | -0.017 | 0.001 | 0.77   | 0.90             | 0.043  | 0.001 | 0.56   | 0.80             | -0.045 | 0.001 | 0.44   | 0.93             |
| PMA at scan                     | 0.458  | 0.001 | <0.001 | <b>&lt;0.001</b> | -0.565 | 0.001 | <0.001 | <b>&lt;0.001</b> | -0.193 | 0.002 | 0.01   | <b>0.01</b>      | -0.547 | 0.002 | <0.001 | <b>&lt;0.001</b> |
| IL-10 T2:SES group              | -0.108 | 0.004 | 0.14   | 0.42             | 0.117  | 0.004 | 0.09   | 0.42             | 0.093  | 0.005 | 0.28   | 0.74             | 0.104  | 0.006 | 0.13   | 0.59             |
| <b>Superior Cingulum Bundle</b> |        |       |        |                  |        |       |        |                  |        |       |        |                  |        |       |        |                  |
| IL-10 T2                        | -0.030 | 0.002 | 0.71   | 0.71             | 0.039  | 0.003 | 0.61   | 0.99             | 0.040  | 0.004 | 0.63   | 0.91             | 0.033  | 0.004 | 0.67   | 0.86             |
| SES group                       | -0.193 | 0.004 | 0.01   | 0.05             | 0.149  | 0.006 | 0.02   | 0.05             | 0.019  | 0.007 | 0.79   | 0.88             | 0.186  | 0.007 | <0.01  | <b>0.02</b>      |
| Sex                             | -0.048 | 0.003 | 0.47   | 0.78             | -0.029 | 0.005 | 0.64   | 0.72             | -0.089 | 0.006 | 0.19   | 0.28             | 0.000  | 0.006 | 1.00   | 1.00             |
| NICU stay                       | 0.044  | 0.007 | 0.60   | 0.79             | 0.030  | 0.012 | 0.71   | 0.92             | 0.047  | 0.014 | 0.58   | 0.95             | 0.012  | 0.014 | 0.88   | 0.88             |
| GA at delivery                  | 0.065  | 0.001 | 0.48   | 0.54             | 0.078  | 0.002 | 0.37   | 0.79             | 0.117  | 0.002 | 0.21   | 0.51             | 0.044  | 0.002 | 0.61   | 0.78             |
| GA at T2                        | -0.006 | 0.000 | 0.93   | 0.93             | 0.025  | 0.001 | 0.69   | 0.90             | 0.034  | 0.001 | 0.62   | 0.80             | 0.014  | 0.001 | 0.83   | 0.93             |
| PMA at scan                     | 0.394  | 0.001 | <0.001 | <b>&lt;0.001</b> | -0.536 | 0.002 | <0.001 | <b>&lt;0.001</b> | -0.381 | 0.002 | <0.001 | <b>&lt;0.001</b> | -0.530 | 0.002 | <0.001 | <b>&lt;0.001</b> |
| IL-10 T2:SES group              | 0.044  | 0.004 | 0.59   | 0.66             | 0.029  | 0.006 | 0.70   | 0.85             | 0.051  | 0.007 | 0.54   | 0.74             | 0.015  | 0.007 | 0.84   | 0.89             |
| <b>Corticospinal Tract</b>      |        |       |        |                  |        |       |        |                  |        |       |        |                  |        |       |        |                  |
| IL-10 T2                        | -0.246 | 0.002 | <0.001 | <b>&lt;0.01</b>  | 0.178  | 0.003 | <0.01  | <b>0.04</b>      | 0.033  | 0.003 | 0.63   | 0.91             | 0.200  | 0.004 | <0.01  | <b>0.01</b>      |
| SES group                       | -0.031 | 0.004 | 0.59   | 0.81             | 0.129  | 0.005 | 0.01   | <b>0.04</b>      | 0.184  | 0.005 | <0.01  | <b>0.01</b>      | 0.102  | 0.006 | 0.06   | 0.11             |
| Sex                             | 0.050  | 0.003 | 0.38   | 0.78             | -0.058 | 0.005 | 0.25   | 0.53             | -0.049 | 0.004 | 0.39   | 0.39             | -0.057 | 0.006 | 0.28   | 0.62             |
| NICU stay                       | -0.027 | 0.008 | 0.70   | 0.79             | -0.015 | 0.012 | 0.81   | 0.92             | 0.009  | 0.010 | 0.90   | 0.95             | -0.013 | 0.014 | 0.84   | 0.88             |
| GA at delivery                  | 0.066  | 0.001 | 0.39   | 0.51             | -0.078 | 0.002 | 0.26   | 0.79             | -0.022 | 0.001 | 0.77   | 0.77             | -0.060 | 0.002 | 0.39   | 0.58             |
| GA at T2                        | 0.062  | 0.000 | 0.29   | 0.64             | -0.010 | 0.001 | 0.85   | 0.90             | 0.022  | 0.001 | 0.71   | 0.80             | -0.027 | 0.001 | 0.61   | 0.93             |
| PMA at scan                     | 0.547  | 0.001 | <0.001 | <b>&lt;0.001</b> | -0.688 | 0.002 | <0.001 | <b>&lt;0.001</b> | -0.634 | 0.002 | <0.001 | <b>&lt;0.001</b> | -0.670 | 0.002 | <0.001 | <b>&lt;0.001</b> |
| IL-10 T2:SES group              | 0.027  | 0.004 | 0.69   | 0.69             | 0.019  | 0.005 | 0.76   | 0.85             | 0.065  | 0.005 | 0.34   | 0.74             | 0.010  | 0.007 | 0.87   | 0.89             |
| <b>Optic Radiation</b>          |        |       |        |                  |        |       |        |                  |        |       |        |                  |        |       |        |                  |
| IL-10 T2                        | -0.094 | 0.002 | 0.17   | 0.41             | 0.074  | 0.004 | 0.25   | 0.56             | 0.026  | 0.004 | 0.74   | 0.91             | 0.082  | 0.004 | 0.18   | 0.41             |
| SES group                       | 0.038  | 0.004 | 0.51   | 0.81             | 0.143  | 0.006 | 0.01   | <b>0.04</b>      | 0.236  | 0.006 | <0.001 | <b>&lt;0.01</b>  | 0.098  | 0.007 | 0.06   | 0.11             |
| Sex                             | 0.007  | 0.004 | 0.90   | 0.90             | -0.164 | 0.006 | <0.01  | <b>0.01</b>      | -0.238 | 0.006 | <0.001 | <b>&lt;0.01</b>  | -0.126 | 0.006 | 0.01   | 0.06             |
| NICU stay                       | -0.096 | 0.008 | 0.18   | 0.79             | 0.065  | 0.013 | 0.33   | 0.92             | 0.016  | 0.013 | 0.84   | 0.95             | 0.079  | 0.014 | 0.22   | 0.87             |
| GA at delivery                  | 0.048  | 0.001 | 0.54   | 0.54             | -0.128 | 0.002 | 0.08   | 0.69             | -0.106 | 0.002 | 0.23   | 0.51             | -0.119 | 0.002 | 0.09   | 0.40             |
| GA at T2                        | 0.076  | 0.001 | 0.19   | 0.64             | 0.028  | 0.001 | 0.61   | 0.90             | 0.085  | 0.001 | 0.20   | 0.43             | 0.001  | 0.001 | 0.99   | 0.99             |
| PMA at scan                     | 0.545  | 0.001 | <0.001 | <b>&lt;0.001</b> | -0.606 | 0.002 | <0.001 | <b>&lt;0.001</b> | -0.352 | 0.002 | <0.001 | <b>&lt;0.001</b> | -0.633 | 0.002 | <0.001 | <b>&lt;0.001</b> |
| IL-10 T2:SES group              | -0.051 | 0.004 | 0.46   | 0.66             | 0.061  | 0.006 | 0.34   | 0.74             | 0.032  | 0.006 | 0.67   | 0.76             | 0.066  | 0.007 | 0.28   | 0.80             |
| <b>Uncinate Fasciculus</b>      |        |       |        |                  |        |       |        |                  |        |       |        |                  |        |       |        |                  |
| IL-10 T2                        | -0.078 | 0.002 | 0.27   | 0.41             | -0.006 | 0.003 | 0.94   | 0.99             | -0.056 | 0.004 | 0.51   | 0.91             | 0.009  | 0.003 | 0.89   | 0.89             |
| SES group                       | -0.041 | 0.003 | 0.49   | 0.81             | 0.103  | 0.005 | 0.11   | 0.19             | 0.086  | 0.006 | 0.23   | 0.35             | 0.092  | 0.006 | 0.12   | 0.19             |
| Sex                             | -0.038 | 0.003 | 0.52   | 0.78             | -0.045 | 0.005 | 0.47   | 0.61             | -0.086 | 0.006 | 0.22   | 0.28             | -0.025 | 0.005 | 0.66   | 0.85             |
| NICU stay                       | -0.017 | 0.007 | 0.82   | 0.82             | 0.022  | 0.011 | 0.78   | 0.92             | 0.006  | 0.014 | 0.95   | 0.95             | 0.028  | 0.012 | 0.70   | 0.88             |
| GA at delivery                  | 0.140  | 0.001 | 0.08   | 0.29             | 0.043  | 0.002 | 0.61   | 0.79             | 0.162  | 0.002 | 0.09   | 0.51             | -0.018 | 0.002 | 0.82   | 0.85             |
| GA at T2                        | 0.022  | 0.000 | 0.71   | 0.84             | 0.086  | 0.001 | 0.18   | 0.90             | 0.115  | 0.001 | 0.11   | 0.43             | 0.056  | 0.001 | 0.34   | 0.93             |
| PMA at scan                     | 0.530  | 0.001 | <0.001 | <b>&lt;0.001</b> | -0.554 | 0.002 | <0.001 | <b>&lt;0.001</b> | -0.239 | 0.002 | <0.01  | <b>&lt;0.01</b>  | -0.612 | 0.002 | <0.001 | <b>&lt;0.001</b> |

|                                             |        |       |        |                  |        |       |        |                  |        |       |        |                  |        |       |        |                  |
|---------------------------------------------|--------|-------|--------|------------------|--------|-------|--------|------------------|--------|-------|--------|------------------|--------|-------|--------|------------------|
| IL-10 T2:SES group                          | -0.055 | 0.003 | 0.43   | 0.66             | -0.010 | 0.006 | 0.90   | 0.90             | -0.059 | 0.007 | 0.49   | 0.74             | 0.013  | 0.006 | 0.86   | 0.89             |
| <b>Inferior Fronto-Occipital Fasciculus</b> |        |       |        |                  |        |       |        |                  |        |       |        |                  |        |       |        |                  |
| IL-10 T2                                    | -0.055 | 0.002 | 0.38   | 0.49             | 0.001  | 0.004 | 0.99   | 0.99             | -0.048 | 0.003 | 0.55   | 0.91             | 0.016  | 0.005 | 0.80   | 0.89             |
| SES group                                   | -0.003 | 0.004 | 0.96   | 0.96             | 0.074  | 0.006 | 0.18   | 0.27             | 0.143  | 0.005 | 0.03   | 0.10             | 0.057  | 0.008 | 0.29   | 0.37             |
| Sex                                         | 0.026  | 0.004 | 0.61   | 0.78             | -0.123 | 0.006 | 0.02   | 0.07             | -0.194 | 0.004 | <0.01  | <b>0.01</b>      | -0.091 | 0.007 | 0.08   | 0.25             |
| NICU stay                                   | -0.031 | 0.008 | 0.64   | 0.79             | 0.048  | 0.013 | 0.47   | 0.92             | 0.038  | 0.010 | 0.65   | 0.95             | 0.046  | 0.016 | 0.49   | 0.87             |
| GA at delivery                              | 0.117  | 0.001 | 0.10   | 0.29             | -0.043 | 0.002 | 0.56   | 0.79             | 0.075  | 0.002 | 0.40   | 0.59             | -0.070 | 0.002 | 0.32   | 0.58             |
| GA at T2                                    | 0.061  | 0.001 | 0.25   | 0.64             | 0.007  | 0.001 | 0.90   | 0.90             | 0.098  | 0.001 | 0.15   | 0.43             | -0.016 | 0.001 | 0.76   | 0.93             |
| PMA at scan                                 | 0.617  | 0.001 | <0.001 | <b>&lt;0.001</b> | -0.640 | 0.002 | <0.001 | <b>&lt;0.001</b> | -0.428 | 0.002 | <0.001 | <b>&lt;0.001</b> | -0.647 | 0.003 | <0.001 | <b>&lt;0.001</b> |
| IL-10 T2:SES group                          | -0.125 | 0.004 | 0.05   | 0.41             | 0.115  | 0.006 | 0.08   | 0.42             | 0.062  | 0.005 | 0.43   | 0.74             | 0.127  | 0.008 | 0.04   | 0.39             |

|                                          |        |       |        |                  |        |       |        |                  |        |       |        |                  |        |       |        |                  |
|------------------------------------------|--------|-------|--------|------------------|--------|-------|--------|------------------|--------|-------|--------|------------------|--------|-------|--------|------------------|
| <b>Anterior Limb of Internal Capsule</b> |        |       |        |                  |        |       |        |                  |        |       |        |                  |        |       |        |                  |
| IL-10 T2                                 | -0.077 | 0.002 | 0.22   | 0.41             | 0.017  | 0.004 | 0.80   | 0.99             | -0.017 | 0.004 | 0.84   | 0.91             | 0.029  | 0.005 | 0.66   | 0.86             |
| SES group                                | 0.014  | 0.003 | 0.79   | 0.89             | 0.055  | 0.007 | 0.36   | 0.41             | 0.087  | 0.006 | 0.21   | 0.35             | 0.041  | 0.008 | 0.47   | 0.53             |
| Sex                                      | 0.020  | 0.003 | 0.69   | 0.78             | -0.054 | 0.007 | 0.35   | 0.53             | -0.061 | 0.006 | 0.36   | 0.39             | -0.048 | 0.008 | 0.39   | 0.68             |
| NICU stay                                | -0.046 | 0.007 | 0.47   | 0.79             | 0.048  | 0.016 | 0.51   | 0.92             | 0.030  | 0.013 | 0.72   | 0.95             | 0.051  | 0.018 | 0.47   | 0.87             |
| GA at delivery                           | 0.170  | 0.001 | 0.02   | 0.15             | -0.041 | 0.002 | 0.61   | 0.79             | 0.067  | 0.002 | 0.46   | 0.59             | -0.074 | 0.003 | 0.33   | 0.58             |
| GA at T2                                 | -0.021 | 0.000 | 0.69   | 0.84             | 0.057  | 0.001 | 0.33   | 0.90             | 0.081  | 0.001 | 0.24   | 0.43             | 0.048  | 0.001 | 0.40   | 0.93             |
| PMA at scan                              | 0.610  | 0.001 | <0.001 | <b>&lt;0.001</b> | -0.591 | 0.002 | <0.001 | <b>&lt;0.001</b> | -0.435 | 0.002 | <0.001 | <b>&lt;0.001</b> | -0.616 | 0.003 | <0.001 | <b>&lt;0.001</b> |
| IL-10 T2:SES group                       | -0.050 | 0.003 | 0.42   | 0.66             | 0.059  | 0.008 | 0.40   | 0.74             | 0.045  | 0.007 | 0.58   | 0.74             | 0.060  | 0.009 | 0.37   | 0.80             |

|                                 |        |       |        |                  |        |       |        |                  |        |       |        |                  |        |       |        |                  |
|---------------------------------|--------|-------|--------|------------------|--------|-------|--------|------------------|--------|-------|--------|------------------|--------|-------|--------|------------------|
| <b>Inferior Cingulum Bundle</b> |        |       |        |                  |        |       |        |                  |        |       |        |                  |        |       |        |                  |
| IL-10 T2                        | -0.186 | 0.002 | 0.02   | 0.08             | 0.177  | 0.002 | 0.01   | <b>0.04</b>      | 0.049  | 0.003 | 0.55   | 0.91             | 0.212  | 0.002 | <0.01  | <b>0.01</b>      |
| SES group                       | -0.143 | 0.003 | 0.03   | 0.10             | 0.235  | 0.003 | <0.001 | <b>&lt;0.001</b> | 0.139  | 0.005 | 0.05   | 0.11             | 0.220  | 0.004 | <0.001 | <b>&lt;0.01</b>  |
| Sex                             | -0.035 | 0.003 | 0.59   | 0.78             | -0.189 | 0.003 | <0.01  | <b>0.01</b>      | -0.205 | 0.004 | <0.01  | <b>0.01</b>      | -0.155 | 0.003 | <0.01  | <b>0.03</b>      |
| NICU stay                       | -0.073 | 0.006 | 0.37   | 0.79             | 0.007  | 0.007 | 0.92   | 0.92             | -0.065 | 0.010 | 0.45   | 0.95             | 0.050  | 0.008 | 0.46   | 0.87             |
| GA at delivery                  | -0.100 | 0.001 | 0.26   | 0.46             | 0.022  | 0.001 | 0.77   | 0.87             | -0.077 | 0.001 | 0.41   | 0.59             | 0.076  | 0.001 | 0.29   | 0.58             |
| GA at T2                        | 0.021  | 0.000 | 0.75   | 0.84             | 0.063  | 0.000 | 0.26   | 0.90             | 0.081  | 0.001 | 0.24   | 0.43             | 0.060  | 0.000 | 0.27   | 0.93             |
| PMA at scan                     | 0.469  | 0.001 | <0.001 | <b>&lt;0.001</b> | -0.644 | 0.001 | <0.001 | <b>&lt;0.001</b> | -0.321 | 0.002 | <0.001 | <b>&lt;0.001</b> | -0.683 | 0.001 | <0.001 | <b>&lt;0.001</b> |
| IL-10 T2:SES group              | 0.046  | 0.003 | 0.55   | 0.66             | -0.032 | 0.003 | 0.62   | 0.85             | -0.004 | 0.005 | 0.96   | 0.96             | -0.049 | 0.004 | 0.45   | 0.80             |

|                    |        |       |        |                  |        |       |        |                  |        |       |        |                  |        |       |        |                  |
|--------------------|--------|-------|--------|------------------|--------|-------|--------|------------------|--------|-------|--------|------------------|--------|-------|--------|------------------|
| <b>Fornix</b>      |        |       |        |                  |        |       |        |                  |        |       |        |                  |        |       |        |                  |
| IL-10 T2           | 0.044  | 0.001 | 0.58   | 0.65             | -0.018 | 0.002 | 0.79   | 0.99             | 0.009  | 0.003 | 0.91   | 0.91             | -0.031 | 0.002 | 0.65   | 0.86             |
| SES group          | -0.173 | 0.002 | 0.01   | 0.05             | 0.072  | 0.004 | 0.22   | 0.29             | -0.004 | 0.005 | 0.96   | 0.96             | 0.111  | 0.004 | 0.06   | 0.11             |
| Sex                | -0.116 | 0.002 | 0.08   | 0.63             | -0.058 | 0.003 | 0.31   | 0.53             | -0.112 | 0.005 | 0.08   | 0.17             | -0.014 | 0.004 | 0.80   | 0.90             |
| NICU stay          | 0.045  | 0.005 | 0.58   | 0.79             | -0.035 | 0.008 | 0.62   | 0.92             | -0.022 | 0.010 | 0.78   | 0.95             | -0.039 | 0.008 | 0.58   | 0.87             |
| GA at delivery     | 0.081  | 0.001 | 0.36   | 0.51             | 0.012  | 0.001 | 0.88   | 0.88             | 0.055  | 0.002 | 0.53   | 0.59             | -0.014 | 0.001 | 0.85   | 0.85             |
| GA at T2           | 0.036  | 0.000 | 0.60   | 0.84             | -0.019 | 0.000 | 0.74   | 0.90             | -0.008 | 0.001 | 0.90   | 0.90             | -0.024 | 0.000 | 0.68   | 0.93             |
| PMA at scan        | 0.381  | 0.001 | <0.001 | <b>&lt;0.001</b> | -0.640 | 0.001 | <0.001 | <b>&lt;0.001</b> | -0.474 | 0.002 | <0.001 | <b>&lt;0.001</b> | -0.653 | 0.001 | <0.001 | <b>&lt;0.001</b> |
| IL-10 T2:SES group | 0.118  | 0.002 | 0.14   | 0.42             | 0.056  | 0.004 | 0.41   | 0.74             | 0.173  | 0.005 | 0.02   | 0.21             | -0.009 | 0.004 | 0.89   | 0.89             |

**IL-10 Trimester 3**

|                        | FA      |       |      |      | MD      |       |      |      | AD      |       |      |             | RD      |       |      |      |
|------------------------|---------|-------|------|------|---------|-------|------|------|---------|-------|------|-------------|---------|-------|------|------|
|                        | $\beta$ | SE    | $p$  | $q$  | $\beta$ | SE    | $p$  | $q$  | $\beta$ | SE    | $p$  | $q$         | $\beta$ | SE    | $p$  | $q$  |
| <b>Corpus Callosum</b> |         |       |      |      |         |       |      |      |         |       |      |             |         |       |      |      |
| IL-10 T3               | -0.031  | 0.002 | 0.65 | 0.65 | -0.010  | 0.002 | 0.87 | 0.90 | -0.124  | 0.002 | 0.12 | 0.35        | 0.007   | 0.003 | 0.91 | 0.91 |
| SES group              | 0.090   | 0.004 | 0.13 | 0.28 | 0.008   | 0.004 | 0.89 | 0.89 | 0.175   | 0.004 | 0.01 | <b>0.01</b> | -0.035  | 0.005 | 0.53 | 0.53 |

|                                             |        |       |        |                  |        |       |        |                  |        |       |        |                  |        |       |        |                  |
|---------------------------------------------|--------|-------|--------|------------------|--------|-------|--------|------------------|--------|-------|--------|------------------|--------|-------|--------|------------------|
| Sex                                         | -0.121 | 0.003 | 0.02   | 0.22             | 0.006  | 0.003 | 0.92   | 0.94             | -0.071 | 0.004 | 0.26   | 0.44             | 0.065  | 0.005 | 0.20   | 0.60             |
| NICU stay                                   | -0.044 | 0.009 | 0.48   | 0.73             | -0.034 | 0.009 | 0.59   | 0.78             | -0.006 | 0.010 | 0.93   | 0.93             | -0.012 | 0.012 | 0.84   | 0.92             |
| GA at delivery                              | -0.016 | 0.001 | 0.82   | 0.82             | 0.013  | 0.001 | 0.85   | 0.96             | 0.056  | 0.002 | 0.50   | 0.90             | -0.005 | 0.002 | 0.94   | 0.97             |
| GA at T3                                    | 0.039  | 0.001 | 0.49   | 0.70             | -0.051 | 0.001 | 0.36   | 0.62             | -0.035 | 0.001 | 0.61   | 0.73             | -0.059 | 0.001 | 0.28   | 0.80             |
| PMA at scan                                 | 0.469  | 0.001 | <0.001 | <b>&lt;0.001</b> | -0.567 | 0.001 | <0.001 | <b>&lt;0.001</b> | -0.179 | 0.002 | 0.01   | <b>0.01</b>      | -0.563 | 0.002 | <0.001 | <b>&lt;0.001</b> |
| IL-10 T3:SES group                          | -0.069 | 0.003 | 0.31   | 0.55             | 0.095  | 0.004 | 0.15   | 0.52             | 0.102  | 0.004 | 0.20   | 0.71             | 0.084  | 0.005 | 0.19   | 0.53             |
| <b>Superior Cingulum Bundle</b>             |        |       |        |                  |        |       |        |                  |        |       |        |                  |        |       |        |                  |
| IL-10 T3                                    | -0.184 | 0.002 | 0.01   | 0.06             | 0.075  | 0.003 | 0.28   | 0.47             | -0.032 | 0.003 | 0.66   | 0.66             | 0.127  | 0.003 | 0.07   | 0.36             |
| SES group                                   | -0.131 | 0.003 | 0.04   | 0.18             | 0.157  | 0.005 | 0.01   | <b>0.01</b>      | 0.068  | 0.006 | 0.28   | 0.28             | 0.172  | 0.006 | <0.01  | <b>0.02</b>      |
| Sex                                         | -0.076 | 0.003 | 0.19   | 0.47             | -0.024 | 0.005 | 0.66   | 0.94             | -0.098 | 0.005 | 0.09   | 0.21             | 0.011  | 0.005 | 0.84   | 0.94             |
| NICU stay                                   | -0.044 | 0.008 | 0.53   | 0.73             | -0.011 | 0.012 | 0.86   | 0.97             | -0.051 | 0.014 | 0.46   | 0.59             | 0.007  | 0.014 | 0.92   | 0.92             |
| GA at delivery                              | 0.042  | 0.001 | 0.59   | 0.76             | 0.051  | 0.002 | 0.49   | 0.79             | 0.078  | 0.002 | 0.32   | 0.71             | 0.028  | 0.002 | 0.70   | 0.90             |
| GA at T3                                    | -0.039 | 0.001 | 0.54   | 0.70             | -0.017 | 0.001 | 0.77   | 0.87             | -0.046 | 0.001 | 0.46   | 0.73             | -0.002 | 0.001 | 0.97   | 0.97             |
| PMA at scan                                 | 0.306  | 0.001 | <0.001 | <b>&lt;0.001</b> | -0.512 | 0.002 | <0.001 | <b>&lt;0.001</b> | -0.404 | 0.002 | <0.001 | <b>&lt;0.001</b> | -0.484 | 0.002 | <0.001 | <b>&lt;0.001</b> |
| IL-10 T3:SES group                          | 0.136  | 0.003 | 0.07   | 0.46             | -0.012 | 0.005 | 0.86   | 0.96             | 0.087  | 0.006 | 0.24   | 0.71             | -0.065 | 0.006 | 0.35   | 0.53             |
| <b>Corticospinal Tract</b>                  |        |       |        |                  |        |       |        |                  |        |       |        |                  |        |       |        |                  |
| IL-10 T3                                    | -0.162 | 0.002 | 0.01   | 0.06             | 0.061  | 0.003 | 0.28   | 0.47             | -0.044 | 0.002 | 0.49   | 0.66             | 0.089  | 0.003 | 0.12   | 0.36             |
| SES group                                   | 0.010  | 0.003 | 0.85   | 0.91             | 0.150  | 0.005 | <0.01  | <b>0.01</b>      | 0.270  | 0.004 | <0.001 | <b>&lt;0.001</b> | 0.101  | 0.006 | 0.04   | 0.05             |
| Sex                                         | 0.009  | 0.003 | 0.86   | 0.97             | -0.040 | 0.004 | 0.38   | 0.68             | -0.051 | 0.004 | 0.31   | 0.44             | -0.030 | 0.005 | 0.51   | 0.92             |
| NICU stay                                   | -0.064 | 0.008 | 0.28   | 0.73             | 0.000  | 0.011 | 1.00   | 1.00             | -0.078 | 0.009 | 0.19   | 0.43             | 0.016  | 0.014 | 0.76   | 0.92             |
| GA at delivery                              | -0.016 | 0.001 | 0.81   | 0.82             | -0.038 | 0.002 | 0.53   | 0.79             | -0.074 | 0.002 | 0.27   | 0.71             | 0.002  | 0.002 | 0.97   | 0.97             |
| GA at T3                                    | 0.075  | 0.001 | 0.16   | 0.70             | -0.080 | 0.001 | 0.10   | 0.62             | -0.056 | 0.001 | 0.30   | 0.73             | -0.080 | 0.001 | 0.10   | 0.80             |
| PMA at scan                                 | 0.523  | 0.001 | <0.001 | <b>&lt;0.001</b> | -0.656 | 0.002 | <0.001 | <b>&lt;0.001</b> | -0.562 | 0.001 | <0.001 | <b>&lt;0.001</b> | -0.644 | 0.002 | <0.001 | <b>&lt;0.001</b> |
| IL-10 T3:SES group                          | -0.102 | 0.003 | 0.10   | 0.46             | 0.075  | 0.004 | 0.19   | 0.52             | 0.010  | 0.004 | 0.88   | 0.96             | 0.094  | 0.005 | 0.11   | 0.53             |
| <b>Optic Radiation</b>                      |        |       |        |                  |        |       |        |                  |        |       |        |                  |        |       |        |                  |
| IL-10 T3                                    | -0.048 | 0.002 | 0.46   | 0.65             | 0.087  | 0.003 | 0.16   | 0.47             | 0.082  | 0.003 | 0.25   | 0.45             | 0.083  | 0.004 | 0.18   | 0.39             |
| SES group                                   | 0.092  | 0.004 | 0.11   | 0.28             | 0.195  | 0.006 | <0.001 | <b>&lt;0.01</b>  | 0.343  | 0.006 | <0.001 | <b>&lt;0.001</b> | 0.122  | 0.007 | 0.02   | <b>0.04</b>      |
| Sex                                         | 0.000  | 0.003 | 0.99   | 0.99             | -0.104 | 0.005 | 0.04   | 0.20             | -0.163 | 0.005 | <0.01  | <b>0.04</b>      | -0.077 | 0.006 | 0.11   | 0.51             |
| NICU stay                                   | -0.098 | 0.009 | 0.11   | 0.51             | 0.039  | 0.013 | 0.50   | 0.78             | -0.031 | 0.013 | 0.64   | 0.72             | 0.061  | 0.015 | 0.29   | 0.92             |
| GA at delivery                              | -0.043 | 0.001 | 0.54   | 0.76             | -0.091 | 0.002 | 0.17   | 0.79             | -0.149 | 0.002 | 0.05   | 0.43             | -0.055 | 0.002 | 0.39   | 0.83             |
| GA at T3                                    | 0.024  | 0.001 | 0.67   | 0.76             | -0.029 | 0.001 | 0.59   | 0.75             | -0.008 | 0.001 | 0.89   | 0.89             | -0.033 | 0.001 | 0.53   | 0.80             |
| PMA at scan                                 | 0.543  | 0.001 | <0.001 | <b>&lt;0.001</b> | -0.546 | 0.002 | <0.001 | <b>&lt;0.001</b> | -0.249 | 0.002 | <0.001 | <b>&lt;0.001</b> | -0.590 | 0.002 | <0.001 | <b>&lt;0.001</b> |
| IL-10 T3:SES group                          | -0.003 | 0.003 | 0.97   | 0.99             | -0.011 | 0.005 | 0.86   | 0.96             | -0.019 | 0.005 | 0.78   | 0.96             | -0.006 | 0.006 | 0.92   | 0.92             |
| <b>Uncinate Fasciculus</b>                  |        |       |        |                  |        |       |        |                  |        |       |        |                  |        |       |        |                  |
| IL-10 T3                                    | -0.042 | 0.002 | 0.53   | 0.65             | -0.085 | 0.003 | 0.20   | 0.47             | -0.134 | 0.003 | 0.06   | 0.29             | -0.049 | 0.003 | 0.45   | 0.67             |
| SES group                                   | -0.052 | 0.003 | 0.37   | 0.67             | 0.152  | 0.005 | 0.01   | <b>0.01</b>      | 0.127  | 0.006 | 0.04   | 0.05             | 0.138  | 0.005 | 0.01   | <b>0.03</b>      |
| Sex                                         | -0.067 | 0.003 | 0.21   | 0.47             | -0.048 | 0.004 | 0.36   | 0.68             | -0.102 | 0.005 | 0.08   | 0.21             | -0.018 | 0.005 | 0.72   | 0.93             |
| NICU stay                                   | -0.035 | 0.007 | 0.58   | 0.73             | -0.157 | 0.011 | 0.01   | 0.12             | -0.197 | 0.014 | <0.01  | <b>0.04</b>      | -0.110 | 0.012 | 0.07   | 0.63             |
| GA at delivery                              | 0.145  | 0.001 | 0.04   | 0.38             | 0.001  | 0.002 | 0.99   | 0.99             | 0.101  | 0.002 | 0.19   | 0.71             | -0.050 | 0.002 | 0.46   | 0.83             |
| GA at T3                                    | -0.014 | 0.001 | 0.81   | 0.81             | -0.047 | 0.001 | 0.42   | 0.62             | -0.052 | 0.001 | 0.40   | 0.73             | -0.036 | 0.001 | 0.52   | 0.80             |
| PMA at scan                                 | 0.451  | 0.001 | <0.001 | <b>&lt;0.001</b> | -0.539 | 0.002 | <0.001 | <b>&lt;0.001</b> | -0.282 | 0.002 | <0.001 | <b>&lt;0.001</b> | -0.581 | 0.002 | <0.001 | <b>&lt;0.001</b> |
| IL-10 T3:SES group                          | -0.042 | 0.003 | 0.53   | 0.79             | -0.079 | 0.004 | 0.24   | 0.52             | -0.109 | 0.005 | 0.14   | 0.71             | -0.055 | 0.005 | 0.40   | 0.53             |
| <b>Inferior Fronto-Occipital Fasciculus</b> |        |       |        |                  |        |       |        |                  |        |       |        |                  |        |       |        |                  |



|                    |        |       |        |                  |        |       |        |                  |        |       |        |                  |        |       |        |                  |
|--------------------|--------|-------|--------|------------------|--------|-------|--------|------------------|--------|-------|--------|------------------|--------|-------|--------|------------------|
| IL-10 T3           | -0.073 | 0.002 | 0.22   | 0.49             | -0.008 | 0.003 | 0.90   | 0.90             | -0.092 | 0.002 | 0.19   | 0.43             | 0.017  | 0.004 | 0.77   | 0.86             |
| SES group          | -0.007 | 0.003 | 0.90   | 0.91             | 0.147  | 0.005 | 0.01   | <b>0.01</b>      | 0.258  | 0.004 | <0.001 | <b>&lt;0.001</b> | 0.108  | 0.007 | 0.03   | 0.05             |
| Sex                | -0.014 | 0.003 | 0.76   | 0.97             | -0.076 | 0.005 | 0.11   | 0.33             | -0.133 | 0.004 | 0.02   | 0.08             | -0.048 | 0.006 | 0.31   | 0.69             |
| NICU stay          | -0.040 | 0.008 | 0.47   | 0.73             | -0.029 | 0.013 | 0.60   | 0.78             | -0.077 | 0.010 | 0.25   | 0.45             | -0.008 | 0.016 | 0.89   | 0.92             |
| GA at delivery     | 0.075  | 0.001 | 0.24   | 0.71             | -0.055 | 0.002 | 0.39   | 0.79             | 0.008  | 0.002 | 0.91   | 0.91             | -0.064 | 0.003 | 0.31   | 0.83             |
| GA at T3           | 0.039  | 0.001 | 0.44   | 0.70             | -0.044 | 0.001 | 0.40   | 0.62             | -0.028 | 0.001 | 0.64   | 0.73             | -0.046 | 0.001 | 0.36   | 0.80             |
| PMA at scan        | 0.588  | 0.001 | <0.001 | <b>&lt;0.001</b> | -0.625 | 0.002 | <0.001 | <b>&lt;0.001</b> | -0.406 | 0.002 | <0.001 | <b>&lt;0.001</b> | -0.634 | 0.002 | <0.001 | <b>&lt;0.001</b> |
| IL-10 T3:SES group | -0.079 | 0.003 | 0.19   | 0.51             | 0.065  | 0.005 | 0.28   | 0.52             | 0.031  | 0.004 | 0.66   | 0.96             | 0.074  | 0.006 | 0.21   | 0.53             |

### Anterior Limb of Internal Capsule

|                    |        |       |        |                  |        |       |        |                  |        |       |        |                  |        |       |        |                  |
|--------------------|--------|-------|--------|------------------|--------|-------|--------|------------------|--------|-------|--------|------------------|--------|-------|--------|------------------|
| IL-10 T3           | -0.040 | 0.002 | 0.49   | 0.65             | -0.062 | 0.004 | 0.32   | 0.47             | -0.133 | 0.003 | 0.06   | 0.29             | -0.038 | 0.004 | 0.54   | 0.69             |
| SES group          | -0.006 | 0.003 | 0.91   | 0.91             | 0.137  | 0.007 | 0.01   | <b>0.02</b>      | 0.188  | 0.006 | <0.01  | <b>0.01</b>      | 0.111  | 0.008 | 0.04   | 0.05             |
| Sex                | -0.040 | 0.003 | 0.39   | 0.69             | -0.009 | 0.006 | 0.86   | 0.94             | -0.024 | 0.005 | 0.67   | 0.67             | 0.001  | 0.007 | 0.99   | 0.99             |
| NICU stay          | -0.025 | 0.007 | 0.65   | 0.73             | -0.052 | 0.016 | 0.38   | 0.78             | -0.101 | 0.013 | 0.13   | 0.39             | -0.032 | 0.018 | 0.58   | 0.92             |
| GA at delivery     | 0.102  | 0.001 | 0.11   | 0.47             | -0.045 | 0.003 | 0.50   | 0.79             | 0.028  | 0.002 | 0.71   | 0.91             | -0.061 | 0.003 | 0.35   | 0.83             |
| GA at T3           | 0.046  | 0.001 | 0.36   | 0.70             | -0.065 | 0.001 | 0.23   | 0.62             | -0.059 | 0.001 | 0.33   | 0.73             | -0.063 | 0.001 | 0.23   | 0.80             |
| PMA at scan        | 0.589  | 0.001 | <0.001 | <b>&lt;0.001</b> | -0.596 | 0.002 | <0.001 | <b>&lt;0.001</b> | -0.460 | 0.002 | <0.001 | <b>&lt;0.001</b> | -0.615 | 0.003 | <0.001 | <b>&lt;0.001</b> |
| IL-10 T3:SES group | -0.071 | 0.003 | 0.23   | 0.51             | 0.067  | 0.006 | 0.29   | 0.52             | 0.054  | 0.005 | 0.45   | 0.96             | 0.069  | 0.007 | 0.26   | 0.53             |

### Inferior Cingulum Bundle

|                    |        |       |        |                  |        |       |        |                  |        |       |        |                  |        |       |        |                  |
|--------------------|--------|-------|--------|------------------|--------|-------|--------|------------------|--------|-------|--------|------------------|--------|-------|--------|------------------|
| IL-10 T3           | -0.144 | 0.001 | 0.05   | 0.15             | 0.063  | 0.002 | 0.32   | 0.47             | -0.034 | 0.002 | 0.65   | 0.66             | 0.107  | 0.002 | 0.09   | 0.36             |
| SES group          | -0.045 | 0.003 | 0.47   | 0.71             | 0.220  | 0.003 | <0.001 | <b>&lt;0.01</b>  | 0.191  | 0.004 | <0.01  | <b>0.01</b>      | 0.170  | 0.003 | <0.01  | <b>0.02</b>      |
| Sex                | 0.043  | 0.002 | 0.46   | 0.69             | -0.101 | 0.003 | 0.04   | 0.20             | -0.054 | 0.004 | 0.36   | 0.44             | -0.107 | 0.003 | 0.03   | 0.30             |
| NICU stay          | -0.126 | 0.006 | 0.07   | 0.51             | -0.030 | 0.007 | 0.61   | 0.78             | -0.118 | 0.009 | 0.09   | 0.39             | 0.043  | 0.008 | 0.47   | 0.92             |
| GA at delivery     | -0.070 | 0.001 | 0.37   | 0.74             | 0.077  | 0.001 | 0.25   | 0.79             | 0.015  | 0.002 | 0.85   | 0.91             | 0.107  | 0.001 | 0.11   | 0.83             |
| GA at T3           | -0.063 | 0.000 | 0.32   | 0.70             | -0.044 | 0.001 | 0.42   | 0.62             | -0.093 | 0.001 | 0.15   | 0.73             | -0.002 | 0.001 | 0.97   | 0.97             |
| PMA at scan        | 0.364  | 0.001 | <0.001 | <b>&lt;0.001</b> | -0.601 | 0.001 | <0.001 | <b>&lt;0.001</b> | -0.339 | 0.001 | <0.001 | <b>&lt;0.001</b> | -0.612 | 0.001 | <0.001 | <b>&lt;0.001</b> |
| IL-10 T3:SES group | 0.014  | 0.002 | 0.85   | 0.99             | -0.003 | 0.003 | 0.96   | 0.96             | 0.003  | 0.004 | 0.96   | 0.96             | -0.027 | 0.003 | 0.68   | 0.76             |

### Fornix

|                    |        |       |        |                  |        |       |        |                  |        |       |        |                  |        |       |        |                  |
|--------------------|--------|-------|--------|------------------|--------|-------|--------|------------------|--------|-------|--------|------------------|--------|-------|--------|------------------|
| IL-10 T3           | -0.033 | 0.001 | 0.65   | 0.65             | 0.057  | 0.002 | 0.37   | 0.47             | 0.034  | 0.003 | 0.63   | 0.66             | 0.061  | 0.002 | 0.32   | 0.58             |
| SES group          | -0.138 | 0.002 | 0.03   | 0.18             | 0.119  | 0.003 | 0.03   | <b>0.03</b>      | 0.066  | 0.005 | 0.28   | 0.28             | 0.140  | 0.003 | 0.01   | <b>0.03</b>      |
| Sex                | -0.090 | 0.002 | 0.12   | 0.47             | -0.004 | 0.003 | 0.94   | 0.94             | -0.048 | 0.004 | 0.39   | 0.44             | 0.025  | 0.003 | 0.61   | 0.92             |
| NICU stay          | -0.009 | 0.005 | 0.89   | 0.89             | -0.054 | 0.008 | 0.37   | 0.78             | -0.068 | 0.011 | 0.31   | 0.46             | -0.040 | 0.008 | 0.50   | 0.92             |
| GA at delivery     | 0.064  | 0.001 | 0.41   | 0.74             | -0.014 | 0.001 | 0.84   | 0.96             | 0.021  | 0.002 | 0.79   | 0.91             | -0.030 | 0.001 | 0.65   | 0.90             |
| GA at T3           | -0.046 | 0.000 | 0.47   | 0.70             | 0.005  | 0.001 | 0.93   | 0.93             | -0.033 | 0.001 | 0.59   | 0.73             | 0.021  | 0.001 | 0.69   | 0.88             |
| PMA at scan        | 0.348  | 0.001 | <0.001 | <b>&lt;0.001</b> | -0.613 | 0.001 | <0.001 | <b>&lt;0.001</b> | -0.465 | 0.002 | <0.001 | <b>&lt;0.001</b> | -0.622 | 0.001 | <0.001 | <b>&lt;0.001</b> |
| IL-10 T3:SES group | 0.001  | 0.002 | 0.99   | 0.99             | -0.049 | 0.003 | 0.44   | 0.67             | -0.022 | 0.004 | 0.76   | 0.96             | -0.051 | 0.003 | 0.41   | 0.53             |

### TNF- $\alpha$ Trimester 1

|                        | FA      |       |      |      | MD      |       |      |      | AD      |       |      |             | RD      |       |      |      |  |
|------------------------|---------|-------|------|------|---------|-------|------|------|---------|-------|------|-------------|---------|-------|------|------|--|
|                        | $\beta$ | SE    | p    | q    | $\beta$ | SE    | p    | q    | $\beta$ | SE    | p    | q           | $\beta$ | SE    | p    | q    |  |
| <b>Corpus Callosum</b> |         |       |      |      |         |       |      |      |         |       |      |             |         |       |      |      |  |
| TNF- $\alpha$ T1       | 0.119   | 0.003 | 0.15 | 0.31 | -0.144  | 0.003 | 0.08 | 0.10 | -0.058  | 0.003 | 0.55 | 0.62        | -0.144  | 0.004 | 0.07 | 0.11 |  |
| SES group              | 0.152   | 0.004 | 0.02 | 0.21 | -0.010  | 0.004 | 0.87 | 0.87 | 0.214   | 0.005 | 0.01 | <b>0.01</b> | -0.089  | 0.005 | 0.16 | 0.16 |  |
| Sex                    | -0.152  | 0.004 | 0.02 | 0.14 | 0.082   | 0.004 | 0.18 | 0.70 | -0.077  | 0.005 | 0.29 | 0.52        | 0.128   | 0.005 | 0.03 | 0.30 |  |
| NICU stay              | 0.010   | 0.009 | 0.89 | 0.96 | -0.059  | 0.009 | 0.41 | 0.75 | 0.061   | 0.010 | 0.46 | 0.71        | -0.065  | 0.012 | 0.35 | 0.80 |  |

|                                             |        |       |        |                  |        |       |        |                  |        |       |        |                  |        |       |        |                  |
|---------------------------------------------|--------|-------|--------|------------------|--------|-------|--------|------------------|--------|-------|--------|------------------|--------|-------|--------|------------------|
| GA at delivery                              | -0.054 | 0.002 | 0.49   | 0.63             | 0.046  | 0.002 | 0.56   | 0.88             | -0.061 | 0.002 | 0.49   | 0.97             | 0.049  | 0.002 | 0.52   | 0.72             |
| GA at T1                                    | -0.068 | 0.001 | 0.27   | 0.77             | 0.093  | 0.001 | 0.13   | 0.97             | 0.033  | 0.001 | 0.65   | 0.76             | 0.093  | 0.001 | 0.12   | 0.96             |
| PMA at scan                                 | 0.444  | 0.002 | <0.001 | <b>&lt;0.001</b> | -0.527 | 0.001 | <0.001 | <b>&lt;0.001</b> | -0.087 | 0.002 | 0.29   | 0.29             | -0.525 | 0.002 | <0.001 | <b>&lt;0.001</b> |
| TNF- $\alpha$ T1:SES group                  | -0.211 | 0.005 | 0.01   | <b>0.01</b>      | 0.191  | 0.005 | 0.02   | <b>0.03</b>      | 0.045  | 0.005 | 0.63   | 0.70             | 0.200  | 0.006 | 0.01   | <b>0.03</b>      |
| <b>Superior Cingulum Bundle</b>             |        |       |        |                  |        |       |        |                  |        |       |        |                  |        |       |        |                  |
| TNF- $\alpha$ T1                            | 0.120  | 0.003 | 0.20   | 0.31             | -0.241 | 0.004 | <0.01  | <b>0.01</b>      | -0.153 | 0.005 | 0.10   | 0.17             | -0.233 | 0.005 | 0.01   | <b>0.02</b>      |
| SES group                                   | -0.141 | 0.004 | 0.06   | 0.26             | 0.194  | 0.006 | <0.01  | <b>0.01</b>      | 0.090  | 0.007 | 0.22   | 0.22             | 0.209  | 0.007 | <0.01  | <b>0.02</b>      |
| Sex                                         | -0.115 | 0.004 | 0.10   | 0.29             | -0.041 | 0.005 | 0.52   | 0.77             | -0.135 | 0.006 | 0.05   | 0.11             | 0.005  | 0.006 | 0.94   | 0.94             |
| NICU stay                                   | 0.012  | 0.008 | 0.88   | 0.96             | 0.059  | 0.012 | 0.41   | 0.75             | 0.056  | 0.015 | 0.48   | 0.71             | 0.045  | 0.014 | 0.54   | 0.80             |
| GA at delivery                              | 0.131  | 0.001 | 0.13   | 0.29             | -0.012 | 0.002 | 0.88   | 0.88             | 0.081  | 0.003 | 0.35   | 0.97             | -0.060 | 0.002 | 0.45   | 0.72             |
| GA at T1                                    | -0.010 | 0.001 | 0.88   | 0.95             | -0.030 | 0.001 | 0.63   | 0.97             | -0.052 | 0.001 | 0.45   | 0.76             | -0.020 | 0.001 | 0.75   | 0.96             |
| PMA at scan                                 | 0.289  | 0.001 | <0.001 | <b>&lt;0.001</b> | -0.483 | 0.002 | <0.001 | <b>&lt;0.001</b> | -0.378 | 0.003 | <0.001 | <b>&lt;0.001</b> | -0.461 | 0.002 | <0.001 | <b>&lt;0.001</b> |
| TNF- $\alpha$ T1:SES group                  | -0.126 | 0.004 | 0.16   | 0.37             | 0.258  | 0.006 | <0.01  | <b>0.01</b>      | 0.191  | 0.008 | 0.03   | 0.08             | 0.242  | 0.007 | <0.01  | <b>0.02</b>      |
| <b>Corticospinal Tract</b>                  |        |       |        |                  |        |       |        |                  |        |       |        |                  |        |       |        |                  |
| TNF- $\alpha$ T1                            | 0.132  | 0.003 | 0.12   | 0.31             | -0.170 | 0.004 | 0.02   | <b>0.04</b>      | -0.118 | 0.003 | 0.13   | 0.17             | -0.173 | 0.004 | 0.02   | 0.05             |
| SES group                                   | 0.059  | 0.004 | 0.38   | 1.00             | 0.142  | 0.005 | 0.02   | <b>0.02</b>      | 0.275  | 0.005 | <0.001 | <b>&lt;0.001</b> | 0.084  | 0.006 | 0.16   | 0.16             |
| Sex                                         | -0.088 | 0.003 | 0.16   | 0.31             | 0.022  | 0.005 | 0.69   | 0.89             | -0.033 | 0.004 | 0.57   | 0.60             | 0.041  | 0.006 | 0.47   | 0.94             |
| NICU stay                                   | 0.089  | 0.008 | 0.22   | 0.96             | 0.020  | 0.011 | 0.76   | 0.75             | 0.089  | 0.010 | 0.19   | 0.71             | -0.006 | 0.013 | 0.92   | 0.92             |
| GA at delivery                              | -0.041 | 0.001 | 0.60   | 0.64             | 0.027  | 0.002 | 0.69   | 0.88             | 0.002  | 0.002 | 0.97   | 0.97             | 0.033  | 0.002 | 0.64   | 0.72             |
| GA at T1                                    | 0.033  | 0.001 | 0.60   | 0.77             | 0.009  | 0.001 | 0.87   | 0.97             | 0.049  | 0.001 | 0.40   | 0.76             | -0.006 | 0.001 | 0.92   | 0.96             |
| PMA at scan                                 | 0.511  | 0.001 | <0.001 | <b>&lt;0.001</b> | -0.666 | 0.002 | <0.001 | <b>&lt;0.001</b> | -0.562 | 0.002 | <0.001 | <b>&lt;0.001</b> | -0.650 | 0.002 | <0.001 | <b>&lt;0.001</b> |
| TNF- $\alpha$ T1:SES group                  | -0.118 | 0.004 | 0.15   | 0.37             | 0.164  | 0.006 | 0.02   | <b>0.04</b>      | 0.126  | 0.005 | 0.10   | 0.15             | 0.164  | 0.007 | 0.03   | 0.05             |
| <b>Optic Radiation</b>                      |        |       |        |                  |        |       |        |                  |        |       |        |                  |        |       |        |                  |
| TNF- $\alpha$ T1                            | 0.073  | 0.003 | 0.38   | 0.42             | -0.063 | 0.005 | 0.44   | 0.44             | -0.004 | 0.005 | 0.96   | 0.96             | -0.071 | 0.005 | 0.37   | 0.42             |
| SES group                                   | 0.046  | 0.004 | 0.48   | 1.00             | 0.195  | 0.007 | <0.01  | <b>0.01</b>      | 0.296  | 0.007 | <0.01  | <b>&lt;0.01</b>  | 0.141  | 0.008 | 0.03   | 0.05             |
| Sex                                         | -0.084 | 0.004 | 0.17   | 0.31             | -0.071 | 0.006 | 0.24   | 0.70             | -0.179 | 0.006 | 0.01   | 0.06             | -0.031 | 0.007 | 0.60   | 0.94             |
| NICU stay                                   | -0.096 | 0.008 | 0.18   | 0.96             | 0.047  | 0.014 | 0.50   | 0.75             | -0.001 | 0.014 | 0.99   | 0.99             | 0.062  | 0.016 | 0.36   | 0.80             |
| GA at delivery                              | -0.122 | 0.001 | 0.12   | 0.29             | -0.016 | 0.003 | 0.83   | 0.88             | -0.104 | 0.002 | 0.21   | 0.96             | 0.019  | 0.003 | 0.80   | 0.80             |
| GA at T1                                    | -0.004 | 0.001 | 0.95   | 0.95             | -0.002 | 0.001 | 0.98   | 0.98             | 0.020  | 0.001 | 0.76   | 0.76             | 0.004  | 0.002 | 0.95   | 0.96             |
| PMA at scan                                 | 0.560  | 0.001 | <0.001 | <b>&lt;0.001</b> | -0.572 | 0.002 | <0.001 | <b>&lt;0.001</b> | -0.312 | 0.002 | <0.001 | <b>&lt;0.001</b> | -0.613 | 0.003 | <0.001 | <b>&lt;0.001</b> |
| TNF- $\alpha$ T1:SES group                  | -0.016 | 0.004 | 0.84   | 0.95             | 0.049  | 0.008 | 0.53   | 0.53             | 0.034  | 0.007 | 0.70   | 0.70             | 0.045  | 0.009 | 0.56   | 0.56             |
| <b>Uncinate Fasciculus</b>                  |        |       |        |                  |        |       |        |                  |        |       |        |                  |        |       |        |                  |
| TNF- $\alpha$ T1                            | -0.074 | 0.002 | 0.37   | 0.42             | -0.069 | 0.004 | 0.41   | 0.44             | -0.141 | 0.005 | 0.13   | 0.17             | -0.031 | 0.004 | 0.70   | 0.70             |
| SES group                                   | 0.016  | 0.003 | 0.82   | 1.00             | 0.159  | 0.006 | 0.02   | <b>0.02</b>      | 0.193  | 0.007 | 0.01   | <b>0.01</b>      | 0.119  | 0.006 | 0.07   | 0.08             |
| Sex                                         | -0.129 | 0.003 | 0.04   | 0.18             | -0.064 | 0.005 | 0.31   | 0.70             | -0.164 | 0.006 | 0.02   | 0.06             | -0.013 | 0.006 | 0.83   | 0.94             |
| NICU stay                                   | 0.016  | 0.007 | 0.83   | 0.96             | 0.020  | 0.012 | 0.79   | 0.75             | 0.017  | 0.014 | 0.84   | 0.94             | 0.021  | 0.013 | 0.77   | 0.86             |
| GA at delivery                              | 0.092  | 0.001 | 0.24   | 0.43             | 0.105  | 0.002 | 0.18   | 0.88             | 0.178  | 0.002 | 0.04   | 0.38             | 0.053  | 0.002 | 0.49   | 0.72             |
| GA at T1                                    | -0.089 | 0.001 | 0.15   | 0.77             | 0.019  | 0.001 | 0.76   | 0.97             | -0.035 | 0.001 | 0.61   | 0.76             | 0.032  | 0.001 | 0.59   | 0.96             |
| PMA at scan                                 | 0.453  | 0.001 | <0.001 | <b>&lt;0.001</b> | -0.572 | 0.002 | <0.001 | <b>&lt;0.001</b> | -0.313 | 0.002 | <0.001 | <b>&lt;0.001</b> | -0.610 | 0.002 | <0.001 | <b>&lt;0.001</b> |
| TNF- $\alpha$ T1:SES group                  | -0.016 | 0.004 | 0.84   | 0.95             | 0.067  | 0.006 | 0.41   | 0.46             | 0.076  | 0.007 | 0.41   | 0.52             | 0.057  | 0.007 | 0.46   | 0.52             |
| <b>Inferior Fronto-Occipital Fasciculus</b> |        |       |        |                  |        |       |        |                  |        |       |        |                  |        |       |        |                  |
| TNF- $\alpha$ T1                            | 0.099  | 0.003 | 0.19   | 0.31             | -0.172 | 0.004 | 0.02   | <b>0.04</b>      | -0.165 | 0.003 | 0.05   | 0.12             | -0.157 | 0.005 | 0.03   | 0.06             |
| SES group                                   | 0.000  | 0.004 | 1.00   | 1.00             | 0.175  | 0.006 | <0.01  | <b>0.01</b>      | 0.316  | 0.005 | <0.001 | <b>&lt;0.001</b> | 0.126  | 0.007 | 0.03   | 0.05             |

|                            |        |       |        |                  |        |       |        |                  |        |       |        |                  |        |       |        |                  |
|----------------------------|--------|-------|--------|------------------|--------|-------|--------|------------------|--------|-------|--------|------------------|--------|-------|--------|------------------|
| Sex                        | -0.038 | 0.004 | 0.50   | 0.56             | -0.078 | 0.005 | 0.15   | 0.70             | -0.159 | 0.004 | 0.01   | 0.06             | -0.043 | 0.007 | 0.43   | 0.94             |
| NICU stay                  | -0.024 | 0.008 | 0.72   | 0.96             | 0.050  | 0.012 | 0.42   | 0.75             | 0.062  | 0.010 | 0.39   | 0.71             | 0.042  | 0.015 | 0.50   | 0.80             |
| GA at delivery             | 0.033  | 0.001 | 0.64   | 0.63             | -0.031 | 0.002 | 0.65   | 0.88             | -0.003 | 0.002 | 0.97   | 0.97             | -0.035 | 0.003 | 0.61   | 0.72             |
| GA at T1                   | -0.047 | 0.001 | 0.40   | 0.77             | 0.018  | 0.001 | 0.74   | 0.97             | -0.019 | 0.001 | 0.76   | 0.76             | 0.036  | 0.002 | 0.50   | 0.96             |
| PMA at scan                | 0.623  | 0.001 | <0.001 | <b>&lt;0.001</b> | -0.650 | 0.002 | <0.001 | <b>&lt;0.001</b> | -0.418 | 0.002 | <0.001 | <b>&lt;0.001</b> | -0.660 | 0.003 | <0.001 | <b>&lt;0.001</b> |
| TNF- $\alpha$ T1:SES group | -0.077 | 0.004 | 0.29   | 0.53             | 0.175  | 0.007 | 0.01   | <b>0.03</b>      | 0.209  | 0.005 | 0.01   | 0.05             | 0.150  | 0.008 | 0.03   | 0.05             |

### Anterior Limb of Internal Capsule

|                            |        |       |        |                  |        |       |        |                  |        |       |        |                  |        |       |        |                  |
|----------------------------|--------|-------|--------|------------------|--------|-------|--------|------------------|--------|-------|--------|------------------|--------|-------|--------|------------------|
| TNF- $\alpha$ T1           | 0.140  | 0.002 | 0.06   | 0.31             | -0.222 | 0.005 | <0.01  | <b>0.01</b>      | -0.212 | 0.004 | 0.02   | 0.06             | -0.214 | 0.006 | 0.01   | <b>0.02</b>      |
| SES group                  | -0.005 | 0.003 | 0.93   | 1.00             | 0.149  | 0.007 | 0.02   | <b>0.02</b>      | 0.203  | 0.006 | <0.01  | <b>0.01</b>      | 0.122  | 0.008 | 0.05   | 0.07             |
| Sex                        | -0.056 | 0.003 | 0.32   | 0.41             | -0.005 | 0.007 | 0.93   | 0.93             | -0.035 | 0.006 | 0.60   | 0.60             | 0.008  | 0.008 | 0.89   | 0.94             |
| NICU stay                  | 0.004  | 0.007 | 0.96   | 0.96             | 0.059  | 0.015 | 0.38   | 0.75             | 0.080  | 0.013 | 0.30   | 0.71             | 0.049  | 0.017 | 0.45   | 0.80             |
| GA at delivery             | 0.109  | 0.001 | 0.12   | 0.29             | -0.030 | 0.003 | 0.68   | 0.88             | 0.034  | 0.002 | 0.68   | 0.97             | -0.050 | 0.003 | 0.48   | 0.72             |
| GA at T1                   | -0.032 | 0.001 | 0.56   | 0.77             | 0.041  | 0.002 | 0.48   | 0.97             | 0.033  | 0.001 | 0.62   | 0.76             | 0.041  | 0.002 | 0.47   | 0.96             |
| PMA at scan                | 0.584  | 0.001 | <0.001 | <b>&lt;0.001</b> | -0.560 | 0.003 | <0.001 | <b>&lt;0.001</b> | -0.382 | 0.002 | <0.001 | <b>&lt;0.001</b> | -0.591 | 0.003 | <0.001 | <b>&lt;0.001</b> |
| TNF- $\alpha$ T1:SES group | -0.122 | 0.004 | 0.10   | 0.37             | 0.237  | 0.008 | <0.01  | <b>0.01</b>      | 0.252  | 0.007 | <0.01  | <b>0.04</b>      | 0.220  | 0.009 | <0.01  | <b>0.02</b>      |

### Inferior Cingulum Bundle

|                            |        |       |        |                  |        |       |        |                  |        |       |        |                  |        |       |        |                  |
|----------------------------|--------|-------|--------|------------------|--------|-------|--------|------------------|--------|-------|--------|------------------|--------|-------|--------|------------------|
| TNF- $\alpha$ T1           | -0.115 | 0.002 | 0.21   | 0.31             | -0.146 | 0.002 | 0.07   | 0.10             | -0.216 | 0.003 | 0.02   | 0.06             | -0.076 | 0.003 | 0.34   | 0.42             |
| SES group                  | 0.007  | 0.003 | 0.93   | 1.00             | 0.207  | 0.003 | <0.01  | <b>0.01</b>      | 0.198  | 0.005 | 0.01   | <b>0.01</b>      | 0.171  | 0.004 | 0.01   | <b>0.04</b>      |
| Sex                        | -0.014 | 0.003 | 0.84   | 0.84             | -0.047 | 0.003 | 0.44   | 0.77             | -0.049 | 0.004 | 0.48   | 0.60             | -0.035 | 0.003 | 0.56   | 0.94             |
| NICU stay                  | 0.073  | 0.006 | 0.36   | 0.96             | -0.011 | 0.007 | 0.87   | 0.75             | 0.029  | 0.010 | 0.72   | 0.92             | -0.032 | 0.008 | 0.65   | 0.83             |
| GA at delivery             | -0.153 | 0.001 | 0.08   | 0.29             | 0.086  | 0.001 | 0.26   | 0.88             | -0.025 | 0.002 | 0.77   | 0.97             | 0.129  | 0.001 | 0.08   | 0.72             |
| GA at T1                   | -0.065 | 0.001 | 0.34   | 0.77             | -0.024 | 0.001 | 0.69   | 0.97             | -0.059 | 0.001 | 0.39   | 0.76             | 0.003  | 0.001 | 0.96   | 0.96             |
| PMA at scan                | 0.397  | 0.001 | <0.001 | <b>&lt;0.001</b> | -0.581 | 0.001 | <0.001 | <b>&lt;0.001</b> | -0.312 | 0.002 | <0.001 | <b>&lt;0.001</b> | -0.617 | 0.001 | <0.001 | <b>&lt;0.001</b> |
| TNF- $\alpha$ T1:SES group | -0.005 | 0.003 | 0.95   | 0.95             | 0.209  | 0.004 | 0.01   | <b>0.03</b>      | 0.214  | 0.005 | 0.02   | 0.05             | 0.165  | 0.004 | 0.04   | 0.05             |

### Fornix

|                            |        |       |        |                  |        |       |        |                  |        |       |        |                  |        |       |        |                  |
|----------------------------|--------|-------|--------|------------------|--------|-------|--------|------------------|--------|-------|--------|------------------|--------|-------|--------|------------------|
| TNF- $\alpha$ T1           | 0.038  | 0.002 | 0.69   | 0.69             | -0.248 | 0.003 | <0.01  | <b>0.01</b>      | -0.239 | 0.004 | 0.01   | 0.05             | -0.221 | 0.003 | <0.01  | <b>0.02</b>      |
| SES group                  | -0.023 | 0.002 | 0.76   | 1.00             | 0.179  | 0.004 | <0.01  | <b>0.01</b>      | 0.186  | 0.005 | 0.01   | <b>0.01</b>      | 0.157  | 0.004 | 0.01   | <b>0.04</b>      |
| Sex                        | -0.084 | 0.002 | 0.24   | 0.36             | -0.006 | 0.003 | 0.92   | 0.93             | -0.035 | 0.005 | 0.59   | 0.60             | 0.018  | 0.003 | 0.76   | 0.94             |
| NICU stay                  | 0.009  | 0.005 | 0.91   | 0.96             | 0.056  | 0.008 | 0.40   | 0.75             | 0.055  | 0.011 | 0.46   | 0.71             | 0.049  | 0.008 | 0.46   | 0.80             |
| GA at delivery             | -0.087 | 0.001 | 0.33   | 0.49             | 0.038  | 0.001 | 0.60   | 0.88             | -0.015 | 0.002 | 0.85   | 0.97             | 0.067  | 0.001 | 0.36   | 0.72             |
| GA at T1                   | -0.044 | 0.000 | 0.53   | 0.77             | 0.060  | 0.001 | 0.30   | 0.97             | 0.060  | 0.001 | 0.35   | 0.76             | 0.059  | 0.001 | 0.30   | 0.96             |
| PMA at scan                | 0.324  | 0.001 | <0.001 | <b>&lt;0.001</b> | -0.608 | 0.001 | <0.001 | <b>&lt;0.001</b> | -0.458 | 0.002 | <0.001 | <b>&lt;0.001</b> | -0.625 | 0.001 | <0.001 | <b>&lt;0.001</b> |
| TNF- $\alpha$ T1:SES group | -0.058 | 0.003 | 0.53   | 0.80             | 0.159  | 0.004 | 0.04   | 0.05             | 0.155  | 0.006 | 0.07   | 0.12             | 0.141  | 0.004 | 0.06   | 0.08             |

### TNF- $\alpha$ Trimester 2

|                        | FA      |       |      |      | MD      |       |      |      | AD      |       |      |      | RD      |       |      |      |
|------------------------|---------|-------|------|------|---------|-------|------|------|---------|-------|------|------|---------|-------|------|------|
|                        | $\beta$ | SE    | $p$  | $q$  | $\beta$ | SE    | $p$  | $q$  | $\beta$ | SE    | $p$  | $q$  | $\beta$ | SE    | $p$  | $q$  |
| <b>Corpus Callosum</b> |         |       |      |      |         |       |      |      |         |       |      |      |         |       |      |      |
| TNF- $\alpha$ T2       | -0.038  | 0.003 | 0.60 | 0.78 | 0.018   | 0.003 | 0.80 | 0.94 | -0.074  | 0.003 | 0.40 | 0.72 | 0.047   | 0.003 | 0.50 | 0.89 |
| SES group              | 0.044   | 0.004 | 0.48 | 0.72 | -0.010  | 0.004 | 0.87 | 0.87 | 0.097   | 0.005 | 0.19 | 0.34 | -0.029  | 0.006 | 0.62 | 0.62 |
| Sex                    | -0.085  | 0.004 | 0.17 | 0.51 | -0.018  | 0.004 | 0.77 | 0.95 | -0.103  | 0.004 | 0.16 | 0.29 | 0.040   | 0.005 | 0.50 | 0.83 |
| NICU stay              | -0.078  | 0.009 | 0.29 | 0.53 | -0.024  | 0.010 | 0.75 | 0.86 | 0.024   | 0.010 | 0.79 | 0.97 | -0.001  | 0.013 | 0.99 | 0.99 |
| GA at delivery         | 0.063   | 0.001 | 0.43 | 0.64 | -0.051  | 0.001 | 0.54 | 0.81 | 0.137   | 0.001 | 0.17 | 0.54 | -0.089  | 0.002 | 0.27 | 0.81 |
| GA at T2               | 0.043   | 0.001 | 0.50 | 0.80 | -0.004  | 0.001 | 0.94 | 0.99 | 0.049   | 0.001 | 0.51 | 0.60 | -0.008  | 0.001 | 0.89 | 1.00 |

|                                             |        |       |        |                  |        |       |        |                  |        |       |        |                  |        |       |        |                  |
|---------------------------------------------|--------|-------|--------|------------------|--------|-------|--------|------------------|--------|-------|--------|------------------|--------|-------|--------|------------------|
| PMA at scan                                 | 0.472  | 0.001 | <0.001 | <b>&lt;0.001</b> | -0.566 | 0.001 | <0.001 | <b>&lt;0.001</b> | -0.205 | 0.002 | <0.001 | <b>&lt;0.001</b> | -0.559 | 0.002 | <0.001 | <b>&lt;0.001</b> |
| TNF- $\alpha$ T2:SES group                  | -0.115 | 0.004 | 0.12   | 0.56             | 0.080  | 0.005 | 0.26   | 0.74             | 0.050  | 0.005 | 0.57   | 0.85             | 0.072  | 0.006 | 0.30   | 0.90             |
| <b>Superior Cingulum Bundle</b>             |        |       |        |                  |        |       |        |                  |        |       |        |                  |        |       |        |                  |
| TNF- $\alpha$ T2                            | -0.010 | 0.002 | 0.90   | 0.90             | -0.005 | 0.003 | 0.94   | 0.94             | -0.001 | 0.004 | 0.99   | 0.99             | 0.000  | 0.004 | 0.99   | 0.99             |
| SES group                                   | -0.197 | 0.004 | <0.01  | <b>0.04</b>      | 0.134  | 0.006 | 0.04   | 0.11             | -0.004 | 0.007 | 0.96   | 0.96             | 0.177  | 0.006 | 0.01   | <b>0.03</b>      |
| Sex                                         | -0.078 | 0.003 | 0.24   | 0.51             | -0.004 | 0.005 | 0.95   | 0.95             | -0.079 | 0.006 | 0.25   | 0.38             | 0.029  | 0.006 | 0.64   | 0.83             |
| NICU stay                                   | 0.019  | 0.008 | 0.82   | 0.82             | 0.053  | 0.012 | 0.50   | 0.86             | 0.061  | 0.014 | 0.48   | 0.97             | 0.037  | 0.014 | 0.64   | 0.92             |
| GA at delivery                              | 0.053  | 0.001 | 0.56   | 0.72             | 0.088  | 0.002 | 0.30   | 0.81             | 0.125  | 0.002 | 0.18   | 0.54             | 0.055  | 0.002 | 0.51   | 0.82             |
| GA at T2                                    | -0.022 | 0.000 | 0.75   | 0.85             | 0.042  | 0.001 | 0.52   | 0.93             | 0.052  | 0.001 | 0.46   | 0.60             | 0.029  | 0.001 | 0.65   | 1.00             |
| PMA at scan                                 | 0.410  | 0.001 | <0.001 | <b>&lt;0.001</b> | -0.546 | 0.002 | <0.001 | <b>&lt;0.001</b> | -0.385 | 0.002 | <0.001 | <b>&lt;0.001</b> | -0.540 | 0.002 | <0.001 | <b>&lt;0.001</b> |
| TNF- $\alpha$ T2:SES group                  | 0.037  | 0.004 | 0.64   | 0.72             | 0.063  | 0.006 | 0.40   | 0.74             | 0.087  | 0.007 | 0.29   | 0.65             | 0.038  | 0.007 | 0.61   | 1.00             |
| <b>Corticospinal Tract</b>                  |        |       |        |                  |        |       |        |                  |        |       |        |                  |        |       |        |                  |
| TNF- $\alpha$ T2                            | -0.127 | 0.002 | 0.08   | 0.17             | 0.133  | 0.003 | 0.03   | 0.30             | 0.063  | 0.003 | 0.36   | 0.72             | 0.132  | 0.004 | 0.04   | 0.28             |
| SES group                                   | -0.008 | 0.004 | 0.89   | 0.97             | 0.104  | 0.005 | 0.05   | 0.11             | 0.170  | 0.004 | <0.01  | <b>0.01</b>      | 0.076  | 0.007 | 0.16   | 0.24             |
| Sex                                         | 0.023  | 0.004 | 0.70   | 0.91             | -0.027 | 0.005 | 0.60   | 0.89             | -0.026 | 0.004 | 0.65   | 0.65             | -0.026 | 0.006 | 0.62   | 0.83             |
| NICU stay                                   | -0.068 | 0.008 | 0.36   | 0.54             | 0.019  | 0.012 | 0.76   | 0.86             | 0.031  | 0.010 | 0.66   | 0.97             | 0.022  | 0.015 | 0.74   | 0.92             |
| GA at delivery                              | 0.035  | 0.001 | 0.66   | 0.74             | -0.050 | 0.002 | 0.47   | 0.81             | -0.006 | 0.001 | 0.94   | 0.94             | -0.031 | 0.002 | 0.66   | 0.85             |
| GA at T2                                    | 0.055  | 0.001 | 0.37   | 0.80             | -0.001 | 0.001 | 0.99   | 0.99             | 0.036  | 0.001 | 0.53   | 0.60             | -0.019 | 0.001 | 0.73   | 1.00             |
| PMA at scan                                 | 0.555  | 0.001 | <0.001 | <b>&lt;0.001</b> | -0.700 | 0.002 | <0.001 | <b>&lt;0.001</b> | -0.651 | 0.001 | <0.001 | <b>&lt;0.001</b> | -0.680 | 0.002 | <0.001 | <b>&lt;0.001</b> |
| TNF- $\alpha$ T2:SES group                  | 0.041  | 0.004 | 0.56   | 0.72             | -0.042 | 0.006 | 0.49   | 0.74             | -0.016 | 0.005 | 0.81   | 0.89             | -0.039 | 0.007 | 0.55   | 1.00             |
| <b>Optic Radiation</b>                      |        |       |        |                  |        |       |        |                  |        |       |        |                  |        |       |        |                  |
| TNF- $\alpha$ T2                            | -0.159 | 0.002 | 0.02   | 0.07             | 0.094  | 0.004 | 0.14   | 0.64             | 0.034  | 0.004 | 0.66   | 0.88             | 0.113  | 0.004 | 0.07   | 0.28             |
| SES group                                   | 0.042  | 0.004 | 0.47   | 0.72             | 0.128  | 0.006 | 0.02   | 0.08             | 0.222  | 0.006 | <0.01  | <b>0.01</b>      | 0.084  | 0.007 | 0.11   | 0.20             |
| Sex                                         | -0.031 | 0.004 | 0.59   | 0.89             | -0.129 | 0.006 | 0.02   | 0.07             | -0.218 | 0.006 | <0.01  | <b>0.01</b>      | -0.089 | 0.006 | 0.09   | 0.38             |
| NICU stay                                   | -0.123 | 0.009 | 0.09   | 0.53             | 0.102  | 0.013 | 0.13   | 0.86             | 0.039  | 0.014 | 0.63   | 0.97             | 0.115  | 0.015 | 0.07   | 0.66             |
| GA at delivery                              | 0.018  | 0.001 | 0.82   | 0.82             | -0.098 | 0.002 | 0.17   | 0.81             | -0.091 | 0.002 | 0.30   | 0.60             | -0.086 | 0.002 | 0.22   | 0.81             |
| GA at T2                                    | 0.058  | 0.001 | 0.33   | 0.80             | 0.044  | 0.001 | 0.42   | 0.93             | 0.084  | 0.001 | 0.21   | 0.38             | 0.021  | 0.001 | 0.69   | 1.00             |
| PMA at scan                                 | 0.567  | 0.001 | <0.001 | <b>&lt;0.001</b> | -0.629 | 0.002 | <0.001 | <b>&lt;0.001</b> | -0.365 | 0.002 | <0.001 | <b>&lt;0.001</b> | -0.656 | 0.002 | <0.001 | <b>&lt;0.001</b> |
| TNF- $\alpha$ T2:SES group                  | 0.105  | 0.004 | 0.13   | 0.56             | -0.055 | 0.006 | 0.38   | 0.74             | -0.010 | 0.007 | 0.89   | 0.89             | -0.072 | 0.007 | 0.24   | 0.90             |
| <b>Uncinate Fasciculus</b>                  |        |       |        |                  |        |       |        |                  |        |       |        |                  |        |       |        |                  |
| TNF- $\alpha$ T2                            | -0.170 | 0.002 | 0.02   | 0.07             | 0.088  | 0.003 | 0.24   | 0.71             | -0.023 | 0.004 | 0.78   | 0.88             | 0.117  | 0.004 | 0.10   | 0.28             |
| SES group                                   | -0.045 | 0.003 | 0.44   | 0.72             | 0.107  | 0.005 | 0.09   | 0.17             | 0.087  | 0.006 | 0.23   | 0.34             | 0.097  | 0.006 | 0.10   | 0.20             |
| Sex                                         | -0.072 | 0.003 | 0.22   | 0.51             | -0.006 | 0.005 | 0.93   | 0.95             | -0.066 | 0.006 | 0.35   | 0.40             | 0.016  | 0.005 | 0.79   | 0.88             |
| NICU stay                                   | -0.022 | 0.007 | 0.76   | 0.82             | 0.015  | 0.012 | 0.85   | 0.86             | -0.004 | 0.014 | 0.97   | 0.97             | 0.023  | 0.012 | 0.76   | 0.92             |
| GA at delivery                              | 0.116  | 0.001 | 0.14   | 0.42             | 0.044  | 0.002 | 0.60   | 0.81             | 0.147  | 0.002 | 0.12   | 0.54             | -0.010 | 0.002 | 0.89   | 0.91             |
| GA at T2                                    | 0.029  | 0.000 | 0.62   | 0.80             | 0.070  | 0.001 | 0.27   | 0.82             | 0.104  | 0.001 | 0.15   | 0.35             | 0.043  | 0.001 | 0.47   | 1.00             |
| PMA at scan                                 | 0.546  | 0.001 | <0.001 | <b>&lt;0.001</b> | -0.565 | 0.002 | <0.001 | <b>&lt;0.001</b> | -0.243 | 0.002 | <0.001 | <b>&lt;0.001</b> | -0.625 | 0.002 | <0.001 | <b>&lt;0.001</b> |
| TNF- $\alpha$ T2:SES group                  | 0.047  | 0.003 | 0.50   | 0.72             | -0.131 | 0.006 | 0.08   | 0.71             | -0.121 | 0.007 | 0.15   | 0.65             | -0.115 | 0.006 | 0.10   | 0.88             |
| <b>Inferior Fronto-Occipital Fasciculus</b> |        |       |        |                  |        |       |        |                  |        |       |        |                  |        |       |        |                  |
| TNF- $\alpha$ T2                            | -0.056 | 0.002 | 0.37   | 0.56             | 0.010  | 0.004 | 0.88   | 0.94             | -0.028 | 0.003 | 0.72   | 0.88             | 0.022  | 0.005 | 0.73   | 0.93             |
| SES group                                   | 0.002  | 0.004 | 0.97   | 0.97             | 0.071  | 0.006 | 0.20   | 0.26             | 0.147  | 0.005 | 0.03   | 0.08             | 0.052  | 0.008 | 0.33   | 0.43             |
| Sex                                         | 0.001  | 0.004 | 0.99   | 0.99             | -0.098 | 0.006 | 0.08   | 0.23             | -0.175 | 0.004 | 0.01   | <b>0.03</b>      | -0.066 | 0.007 | 0.22   | 0.66             |
| NICU stay                                   | -0.074 | 0.009 | 0.26   | 0.53             | 0.069  | 0.014 | 0.31   | 0.86             | 0.022  | 0.010 | 0.79   | 0.97             | 0.075  | 0.017 | 0.26   | 0.78             |

| GA at delivery                                                                                                                                                                                                                                                                                                                                                                                                                                                                                                                                                                                                                                                                                                                                                                                                                                                                                                                                                                                                                                                                                                                                                                                                                                                                                                                                                                                                                                                                                                                                                                                                                                                                                                                                                                                                                                                                                                                                                                                                                                                                                                                                                                                                                                                                                                                                                                                                                                                                                                                                                                                                                                                                                                                                                                                                                                                                                                                                    | 0.078   | 0.001 | 0.27   | 0.61             | -0.023  | 0.002 | 0.75   | 0.81             | 0.066   | 0.002 | 0.46   | 0.60             | -0.043  | 0.003 | 0.54   | 0.82             |  |    |  |  |  |    |  |  |  |    |  |  |  |    |  |  |  |         |    |     |     |         |    |     |     |         |    |     |     |         |    |     |     |                        |  |  |  |  |  |  |  |  |  |  |  |  |  |  |  |  |                  |       |       |      |      |        |       |      |      |        |       |      |      |        |       |      |      |           |       |       |      |      |        |       |      |      |       |       |      |             |        |       |      |      |     |        |       |      |      |       |       |      |      |        |       |      |      |       |       |      |      |           |        |       |      |      |        |       |      |      |        |       |      |      |       |       |      |      |                |        |       |      |      |       |       |      |      |       |       |      |      |        |       |      |      |          |       |       |      |      |        |       |      |      |        |       |      |      |        |       |      |      |             |       |       |        |                  |        |       |        |                  |        |       |      |             |        |       |        |                  |                            |        |       |      |      |       |       |      |      |       |       |      |      |       |       |      |      |
|---------------------------------------------------------------------------------------------------------------------------------------------------------------------------------------------------------------------------------------------------------------------------------------------------------------------------------------------------------------------------------------------------------------------------------------------------------------------------------------------------------------------------------------------------------------------------------------------------------------------------------------------------------------------------------------------------------------------------------------------------------------------------------------------------------------------------------------------------------------------------------------------------------------------------------------------------------------------------------------------------------------------------------------------------------------------------------------------------------------------------------------------------------------------------------------------------------------------------------------------------------------------------------------------------------------------------------------------------------------------------------------------------------------------------------------------------------------------------------------------------------------------------------------------------------------------------------------------------------------------------------------------------------------------------------------------------------------------------------------------------------------------------------------------------------------------------------------------------------------------------------------------------------------------------------------------------------------------------------------------------------------------------------------------------------------------------------------------------------------------------------------------------------------------------------------------------------------------------------------------------------------------------------------------------------------------------------------------------------------------------------------------------------------------------------------------------------------------------------------------------------------------------------------------------------------------------------------------------------------------------------------------------------------------------------------------------------------------------------------------------------------------------------------------------------------------------------------------------------------------------------------------------------------------------------------------------|---------|-------|--------|------------------|---------|-------|--------|------------------|---------|-------|--------|------------------|---------|-------|--------|------------------|--|----|--|--|--|----|--|--|--|----|--|--|--|----|--|--|--|---------|----|-----|-----|---------|----|-----|-----|---------|----|-----|-----|---------|----|-----|-----|------------------------|--|--|--|--|--|--|--|--|--|--|--|--|--|--|--|--|------------------|-------|-------|------|------|--------|-------|------|------|--------|-------|------|------|--------|-------|------|------|-----------|-------|-------|------|------|--------|-------|------|------|-------|-------|------|-------------|--------|-------|------|------|-----|--------|-------|------|------|-------|-------|------|------|--------|-------|------|------|-------|-------|------|------|-----------|--------|-------|------|------|--------|-------|------|------|--------|-------|------|------|-------|-------|------|------|----------------|--------|-------|------|------|-------|-------|------|------|-------|-------|------|------|--------|-------|------|------|----------|-------|-------|------|------|--------|-------|------|------|--------|-------|------|------|--------|-------|------|------|-------------|-------|-------|--------|------------------|--------|-------|--------|------------------|--------|-------|------|-------------|--------|-------|--------|------------------|----------------------------|--------|-------|------|------|-------|-------|------|------|-------|-------|------|------|-------|-------|------|------|
| GA at T2                                                                                                                                                                                                                                                                                                                                                                                                                                                                                                                                                                                                                                                                                                                                                                                                                                                                                                                                                                                                                                                                                                                                                                                                                                                                                                                                                                                                                                                                                                                                                                                                                                                                                                                                                                                                                                                                                                                                                                                                                                                                                                                                                                                                                                                                                                                                                                                                                                                                                                                                                                                                                                                                                                                                                                                                                                                                                                                                          | 0.039   | 0.001 | 0.47   | 0.80             | 0.027   | 0.001 | 0.63   | 0.95             | 0.106   | 0.001 | 0.12   | 0.35             | 0.005   | 0.001 | 0.93   | 1.00             |  |    |  |  |  |    |  |  |  |    |  |  |  |    |  |  |  |         |    |     |     |         |    |     |     |         |    |     |     |         |    |     |     |                        |  |  |  |  |  |  |  |  |  |  |  |  |  |  |  |  |                  |       |       |      |      |        |       |      |      |        |       |      |      |        |       |      |      |           |       |       |      |      |        |       |      |      |       |       |      |             |        |       |      |      |     |        |       |      |      |       |       |      |      |        |       |      |      |       |       |      |      |           |        |       |      |      |        |       |      |      |        |       |      |      |       |       |      |      |                |        |       |      |      |       |       |      |      |       |       |      |      |        |       |      |      |          |       |       |      |      |        |       |      |      |        |       |      |      |        |       |      |      |             |       |       |        |                  |        |       |        |                  |        |       |      |             |        |       |        |                  |                            |        |       |      |      |       |       |      |      |       |       |      |      |       |       |      |      |
| PMA at scan                                                                                                                                                                                                                                                                                                                                                                                                                                                                                                                                                                                                                                                                                                                                                                                                                                                                                                                                                                                                                                                                                                                                                                                                                                                                                                                                                                                                                                                                                                                                                                                                                                                                                                                                                                                                                                                                                                                                                                                                                                                                                                                                                                                                                                                                                                                                                                                                                                                                                                                                                                                                                                                                                                                                                                                                                                                                                                                                       | 0.642   | 0.001 | <0.001 | <b>&lt;0.001</b> | -0.658  | 0.002 | <0.001 | <b>&lt;0.001</b> | -0.434  | 0.002 | <0.001 | <b>&lt;0.001</b> | -0.667  | 0.003 | <0.001 | <b>&lt;0.001</b> |  |    |  |  |  |    |  |  |  |    |  |  |  |    |  |  |  |         |    |     |     |         |    |     |     |         |    |     |     |         |    |     |     |                        |  |  |  |  |  |  |  |  |  |  |  |  |  |  |  |  |                  |       |       |      |      |        |       |      |      |        |       |      |      |        |       |      |      |           |       |       |      |      |        |       |      |      |       |       |      |             |        |       |      |      |     |        |       |      |      |       |       |      |      |        |       |      |      |       |       |      |      |           |        |       |      |      |        |       |      |      |        |       |      |      |       |       |      |      |                |        |       |      |      |       |       |      |      |       |       |      |      |        |       |      |      |          |       |       |      |      |        |       |      |      |        |       |      |      |        |       |      |      |             |       |       |        |                  |        |       |        |                  |        |       |      |             |        |       |        |                  |                            |        |       |      |      |       |       |      |      |       |       |      |      |       |       |      |      |
| TNF- $\alpha$ T2:SES group                                                                                                                                                                                                                                                                                                                                                                                                                                                                                                                                                                                                                                                                                                                                                                                                                                                                                                                                                                                                                                                                                                                                                                                                                                                                                                                                                                                                                                                                                                                                                                                                                                                                                                                                                                                                                                                                                                                                                                                                                                                                                                                                                                                                                                                                                                                                                                                                                                                                                                                                                                                                                                                                                                                                                                                                                                                                                                                        | 0.019   | 0.004 | 0.76   | 0.76             | 0.002   | 0.007 | 0.97   | 0.97             | 0.032   | 0.005 | 0.68   | 0.88             | 0.000   | 0.008 | 1.00   | 1.00             |  |    |  |  |  |    |  |  |  |    |  |  |  |    |  |  |  |         |    |     |     |         |    |     |     |         |    |     |     |         |    |     |     |                        |  |  |  |  |  |  |  |  |  |  |  |  |  |  |  |  |                  |       |       |      |      |        |       |      |      |        |       |      |      |        |       |      |      |           |       |       |      |      |        |       |      |      |       |       |      |             |        |       |      |      |     |        |       |      |      |       |       |      |      |        |       |      |      |       |       |      |      |           |        |       |      |      |        |       |      |      |        |       |      |      |       |       |      |      |                |        |       |      |      |       |       |      |      |       |       |      |      |        |       |      |      |          |       |       |      |      |        |       |      |      |        |       |      |      |        |       |      |      |             |       |       |        |                  |        |       |        |                  |        |       |      |             |        |       |        |                  |                            |        |       |      |      |       |       |      |      |       |       |      |      |       |       |      |      |
| <b>Anterior Limb of Internal Capsule</b>                                                                                                                                                                                                                                                                                                                                                                                                                                                                                                                                                                                                                                                                                                                                                                                                                                                                                                                                                                                                                                                                                                                                                                                                                                                                                                                                                                                                                                                                                                                                                                                                                                                                                                                                                                                                                                                                                                                                                                                                                                                                                                                                                                                                                                                                                                                                                                                                                                                                                                                                                                                                                                                                                                                                                                                                                                                                                                          |         |       |        |                  |         |       |        |                  |         |       |        |                  |         |       |        |                  |  |    |  |  |  |    |  |  |  |    |  |  |  |    |  |  |  |         |    |     |     |         |    |     |     |         |    |     |     |         |    |     |     |                        |  |  |  |  |  |  |  |  |  |  |  |  |  |  |  |  |                  |       |       |      |      |        |       |      |      |        |       |      |      |        |       |      |      |           |       |       |      |      |        |       |      |      |       |       |      |             |        |       |      |      |     |        |       |      |      |       |       |      |      |        |       |      |      |       |       |      |      |           |        |       |      |      |        |       |      |      |        |       |      |      |       |       |      |      |                |        |       |      |      |       |       |      |      |       |       |      |      |        |       |      |      |          |       |       |      |      |        |       |      |      |        |       |      |      |        |       |      |      |             |       |       |        |                  |        |       |        |                  |        |       |      |             |        |       |        |                  |                            |        |       |      |      |       |       |      |      |       |       |      |      |       |       |      |      |
| TNF- $\alpha$ T2                                                                                                                                                                                                                                                                                                                                                                                                                                                                                                                                                                                                                                                                                                                                                                                                                                                                                                                                                                                                                                                                                                                                                                                                                                                                                                                                                                                                                                                                                                                                                                                                                                                                                                                                                                                                                                                                                                                                                                                                                                                                                                                                                                                                                                                                                                                                                                                                                                                                                                                                                                                                                                                                                                                                                                                                                                                                                                                                  | -0.025  | 0.002 | 0.69   | 0.78             | -0.044  | 0.005 | 0.54   | 0.94             | -0.076  | 0.004 | 0.35   | 0.72             | -0.030  | 0.005 | 0.66   | 0.93             |  |    |  |  |  |    |  |  |  |    |  |  |  |    |  |  |  |         |    |     |     |         |    |     |     |         |    |     |     |         |    |     |     |                        |  |  |  |  |  |  |  |  |  |  |  |  |  |  |  |  |                  |       |       |      |      |        |       |      |      |        |       |      |      |        |       |      |      |           |       |       |      |      |        |       |      |      |       |       |      |             |        |       |      |      |     |        |       |      |      |       |       |      |      |        |       |      |      |       |       |      |      |           |        |       |      |      |        |       |      |      |        |       |      |      |       |       |      |      |                |        |       |      |      |       |       |      |      |       |       |      |      |        |       |      |      |          |       |       |      |      |        |       |      |      |        |       |      |      |        |       |      |      |             |       |       |        |                  |        |       |        |                  |        |       |      |             |        |       |        |                  |                            |        |       |      |      |       |       |      |      |       |       |      |      |       |       |      |      |
| SES group                                                                                                                                                                                                                                                                                                                                                                                                                                                                                                                                                                                                                                                                                                                                                                                                                                                                                                                                                                                                                                                                                                                                                                                                                                                                                                                                                                                                                                                                                                                                                                                                                                                                                                                                                                                                                                                                                                                                                                                                                                                                                                                                                                                                                                                                                                                                                                                                                                                                                                                                                                                                                                                                                                                                                                                                                                                                                                                                         | 0.018   | 0.003 | 0.73   | 0.94             | 0.043   | 0.008 | 0.48   | 0.53             | 0.073   | 0.006 | 0.29   | 0.37             | 0.030   | 0.009 | 0.59   | 0.62             |  |    |  |  |  |    |  |  |  |    |  |  |  |    |  |  |  |         |    |     |     |         |    |     |     |         |    |     |     |         |    |     |     |                        |  |  |  |  |  |  |  |  |  |  |  |  |  |  |  |  |                  |       |       |      |      |        |       |      |      |        |       |      |      |        |       |      |      |           |       |       |      |      |        |       |      |      |       |       |      |             |        |       |      |      |     |        |       |      |      |       |       |      |      |        |       |      |      |       |       |      |      |           |        |       |      |      |        |       |      |      |        |       |      |      |       |       |      |      |                |        |       |      |      |       |       |      |      |       |       |      |      |        |       |      |      |          |       |       |      |      |        |       |      |      |        |       |      |      |        |       |      |      |             |       |       |        |                  |        |       |        |                  |        |       |      |             |        |       |        |                  |                            |        |       |      |      |       |       |      |      |       |       |      |      |       |       |      |      |
| Sex                                                                                                                                                                                                                                                                                                                                                                                                                                                                                                                                                                                                                                                                                                                                                                                                                                                                                                                                                                                                                                                                                                                                                                                                                                                                                                                                                                                                                                                                                                                                                                                                                                                                                                                                                                                                                                                                                                                                                                                                                                                                                                                                                                                                                                                                                                                                                                                                                                                                                                                                                                                                                                                                                                                                                                                                                                                                                                                                               | 0.009   | 0.003 | 0.86   | 0.97             | -0.050  | 0.007 | 0.40   | 0.89             | -0.062  | 0.006 | 0.36   | 0.40             | -0.043  | 0.008 | 0.45   | 0.83             |  |    |  |  |  |    |  |  |  |    |  |  |  |    |  |  |  |         |    |     |     |         |    |     |     |         |    |     |     |         |    |     |     |                        |  |  |  |  |  |  |  |  |  |  |  |  |  |  |  |  |                  |       |       |      |      |        |       |      |      |        |       |      |      |        |       |      |      |           |       |       |      |      |        |       |      |      |       |       |      |             |        |       |      |      |     |        |       |      |      |       |       |      |      |        |       |      |      |       |       |      |      |           |        |       |      |      |        |       |      |      |        |       |      |      |       |       |      |      |                |        |       |      |      |       |       |      |      |       |       |      |      |        |       |      |      |          |       |       |      |      |        |       |      |      |        |       |      |      |        |       |      |      |             |       |       |        |                  |        |       |        |                  |        |       |      |             |        |       |        |                  |                            |        |       |      |      |       |       |      |      |       |       |      |      |       |       |      |      |
| NICU stay                                                                                                                                                                                                                                                                                                                                                                                                                                                                                                                                                                                                                                                                                                                                                                                                                                                                                                                                                                                                                                                                                                                                                                                                                                                                                                                                                                                                                                                                                                                                                                                                                                                                                                                                                                                                                                                                                                                                                                                                                                                                                                                                                                                                                                                                                                                                                                                                                                                                                                                                                                                                                                                                                                                                                                                                                                                                                                                                         | -0.086  | 0.007 | 0.19   | 0.53             | 0.057   | 0.016 | 0.44   | 0.86             | 0.018   | 0.014 | 0.83   | 0.97             | 0.066   | 0.018 | 0.34   | 0.78             |  |    |  |  |  |    |  |  |  |    |  |  |  |    |  |  |  |         |    |     |     |         |    |     |     |         |    |     |     |         |    |     |     |                        |  |  |  |  |  |  |  |  |  |  |  |  |  |  |  |  |                  |       |       |      |      |        |       |      |      |        |       |      |      |        |       |      |      |           |       |       |      |      |        |       |      |      |       |       |      |             |        |       |      |      |     |        |       |      |      |       |       |      |      |        |       |      |      |       |       |      |      |           |        |       |      |      |        |       |      |      |        |       |      |      |       |       |      |      |                |        |       |      |      |       |       |      |      |       |       |      |      |        |       |      |      |          |       |       |      |      |        |       |      |      |        |       |      |      |        |       |      |      |             |       |       |        |                  |        |       |        |                  |        |       |      |             |        |       |        |                  |                            |        |       |      |      |       |       |      |      |       |       |      |      |       |       |      |      |
| GA at delivery                                                                                                                                                                                                                                                                                                                                                                                                                                                                                                                                                                                                                                                                                                                                                                                                                                                                                                                                                                                                                                                                                                                                                                                                                                                                                                                                                                                                                                                                                                                                                                                                                                                                                                                                                                                                                                                                                                                                                                                                                                                                                                                                                                                                                                                                                                                                                                                                                                                                                                                                                                                                                                                                                                                                                                                                                                                                                                                                    | 0.134   | 0.001 | 0.06   | 0.42             | -0.032  | 0.002 | 0.69   | 0.81             | 0.057   | 0.002 | 0.53   | 0.60             | -0.058  | 0.003 | 0.44   | 0.82             |  |    |  |  |  |    |  |  |  |    |  |  |  |    |  |  |  |         |    |     |     |         |    |     |     |         |    |     |     |         |    |     |     |                        |  |  |  |  |  |  |  |  |  |  |  |  |  |  |  |  |                  |       |       |      |      |        |       |      |      |        |       |      |      |        |       |      |      |           |       |       |      |      |        |       |      |      |       |       |      |             |        |       |      |      |     |        |       |      |      |       |       |      |      |        |       |      |      |       |       |      |      |           |        |       |      |      |        |       |      |      |        |       |      |      |       |       |      |      |                |        |       |      |      |       |       |      |      |       |       |      |      |        |       |      |      |          |       |       |      |      |        |       |      |      |        |       |      |      |        |       |      |      |             |       |       |        |                  |        |       |        |                  |        |       |      |             |        |       |        |                  |                            |        |       |      |      |       |       |      |      |       |       |      |      |       |       |      |      |
| GA at T2                                                                                                                                                                                                                                                                                                                                                                                                                                                                                                                                                                                                                                                                                                                                                                                                                                                                                                                                                                                                                                                                                                                                                                                                                                                                                                                                                                                                                                                                                                                                                                                                                                                                                                                                                                                                                                                                                                                                                                                                                                                                                                                                                                                                                                                                                                                                                                                                                                                                                                                                                                                                                                                                                                                                                                                                                                                                                                                                          | -0.039  | 0.000 | 0.46   | 0.80             | 0.083   | 0.001 | 0.17   | 0.82             | 0.110   | 0.001 | 0.11   | 0.35             | 0.072   | 0.001 | 0.21   | 1.00             |  |    |  |  |  |    |  |  |  |    |  |  |  |    |  |  |  |         |    |     |     |         |    |     |     |         |    |     |     |         |    |     |     |                        |  |  |  |  |  |  |  |  |  |  |  |  |  |  |  |  |                  |       |       |      |      |        |       |      |      |        |       |      |      |        |       |      |      |           |       |       |      |      |        |       |      |      |       |       |      |             |        |       |      |      |     |        |       |      |      |       |       |      |      |        |       |      |      |       |       |      |      |           |        |       |      |      |        |       |      |      |        |       |      |      |       |       |      |      |                |        |       |      |      |       |       |      |      |       |       |      |      |        |       |      |      |          |       |       |      |      |        |       |      |      |        |       |      |      |        |       |      |      |             |       |       |        |                  |        |       |        |                  |        |       |      |             |        |       |        |                  |                            |        |       |      |      |       |       |      |      |       |       |      |      |       |       |      |      |
| PMA at scan                                                                                                                                                                                                                                                                                                                                                                                                                                                                                                                                                                                                                                                                                                                                                                                                                                                                                                                                                                                                                                                                                                                                                                                                                                                                                                                                                                                                                                                                                                                                                                                                                                                                                                                                                                                                                                                                                                                                                                                                                                                                                                                                                                                                                                                                                                                                                                                                                                                                                                                                                                                                                                                                                                                                                                                                                                                                                                                                       | 0.627   | 0.001 | <0.001 | <b>&lt;0.001</b> | -0.595  | 0.002 | <0.001 | <b>&lt;0.001</b> | -0.435  | 0.002 | <0.001 | <b>&lt;0.001</b> | -0.622  | 0.003 | <0.001 | <b>&lt;0.001</b> |  |    |  |  |  |    |  |  |  |    |  |  |  |    |  |  |  |         |    |     |     |         |    |     |     |         |    |     |     |         |    |     |     |                        |  |  |  |  |  |  |  |  |  |  |  |  |  |  |  |  |                  |       |       |      |      |        |       |      |      |        |       |      |      |        |       |      |      |           |       |       |      |      |        |       |      |      |       |       |      |             |        |       |      |      |     |        |       |      |      |       |       |      |      |        |       |      |      |       |       |      |      |           |        |       |      |      |        |       |      |      |        |       |      |      |       |       |      |      |                |        |       |      |      |       |       |      |      |       |       |      |      |        |       |      |      |          |       |       |      |      |        |       |      |      |        |       |      |      |        |       |      |      |             |       |       |        |                  |        |       |        |                  |        |       |      |             |        |       |        |                  |                            |        |       |      |      |       |       |      |      |       |       |      |      |       |       |      |      |
| TNF- $\alpha$ T2:SES group                                                                                                                                                                                                                                                                                                                                                                                                                                                                                                                                                                                                                                                                                                                                                                                                                                                                                                                                                                                                                                                                                                                                                                                                                                                                                                                                                                                                                                                                                                                                                                                                                                                                                                                                                                                                                                                                                                                                                                                                                                                                                                                                                                                                                                                                                                                                                                                                                                                                                                                                                                                                                                                                                                                                                                                                                                                                                                                        | 0.037   | 0.003 | 0.55   | 0.72             | 0.021   | 0.008 | 0.77   | 0.86             | 0.055   | 0.007 | 0.49   | 0.85             | 0.008   | 0.009 | 0.90   | 1.00             |  |    |  |  |  |    |  |  |  |    |  |  |  |    |  |  |  |         |    |     |     |         |    |     |     |         |    |     |     |         |    |     |     |                        |  |  |  |  |  |  |  |  |  |  |  |  |  |  |  |  |                  |       |       |      |      |        |       |      |      |        |       |      |      |        |       |      |      |           |       |       |      |      |        |       |      |      |       |       |      |             |        |       |      |      |     |        |       |      |      |       |       |      |      |        |       |      |      |       |       |      |      |           |        |       |      |      |        |       |      |      |        |       |      |      |       |       |      |      |                |        |       |      |      |       |       |      |      |       |       |      |      |        |       |      |      |          |       |       |      |      |        |       |      |      |        |       |      |      |        |       |      |      |             |       |       |        |                  |        |       |        |                  |        |       |      |             |        |       |        |                  |                            |        |       |      |      |       |       |      |      |       |       |      |      |       |       |      |      |
| <b>Inferior Cingulum Bundle</b>                                                                                                                                                                                                                                                                                                                                                                                                                                                                                                                                                                                                                                                                                                                                                                                                                                                                                                                                                                                                                                                                                                                                                                                                                                                                                                                                                                                                                                                                                                                                                                                                                                                                                                                                                                                                                                                                                                                                                                                                                                                                                                                                                                                                                                                                                                                                                                                                                                                                                                                                                                                                                                                                                                                                                                                                                                                                                                                   |         |       |        |                  |         |       |        |                  |         |       |        |                  |         |       |        |                  |  |    |  |  |  |    |  |  |  |    |  |  |  |    |  |  |  |         |    |     |     |         |    |     |     |         |    |     |     |         |    |     |     |                        |  |  |  |  |  |  |  |  |  |  |  |  |  |  |  |  |                  |       |       |      |      |        |       |      |      |        |       |      |      |        |       |      |      |           |       |       |      |      |        |       |      |      |       |       |      |             |        |       |      |      |     |        |       |      |      |       |       |      |      |        |       |      |      |       |       |      |      |           |        |       |      |      |        |       |      |      |        |       |      |      |       |       |      |      |                |        |       |      |      |       |       |      |      |       |       |      |      |        |       |      |      |          |       |       |      |      |        |       |      |      |        |       |      |      |        |       |      |      |             |       |       |        |                  |        |       |        |                  |        |       |      |             |        |       |        |                  |                            |        |       |      |      |       |       |      |      |       |       |      |      |       |       |      |      |
| TNF- $\alpha$ T2                                                                                                                                                                                                                                                                                                                                                                                                                                                                                                                                                                                                                                                                                                                                                                                                                                                                                                                                                                                                                                                                                                                                                                                                                                                                                                                                                                                                                                                                                                                                                                                                                                                                                                                                                                                                                                                                                                                                                                                                                                                                                                                                                                                                                                                                                                                                                                                                                                                                                                                                                                                                                                                                                                                                                                                                                                                                                                                                  | -0.230  | 0.002 | <0.01  | <b>0.03</b>      | 0.021   | 0.002 | 0.76   | 0.94             | -0.144  | 0.003 | 0.08   | 0.71             | 0.101   | 0.002 | 0.12   | 0.28             |  |    |  |  |  |    |  |  |  |    |  |  |  |    |  |  |  |         |    |     |     |         |    |     |     |         |    |     |     |         |    |     |     |                        |  |  |  |  |  |  |  |  |  |  |  |  |  |  |  |  |                  |       |       |      |      |        |       |      |      |        |       |      |      |        |       |      |      |           |       |       |      |      |        |       |      |      |       |       |      |             |        |       |      |      |     |        |       |      |      |       |       |      |      |        |       |      |      |       |       |      |      |           |        |       |      |      |        |       |      |      |        |       |      |      |       |       |      |      |                |        |       |      |      |       |       |      |      |       |       |      |      |        |       |      |      |          |       |       |      |      |        |       |      |      |        |       |      |      |        |       |      |      |             |       |       |        |                  |        |       |        |                  |        |       |      |             |        |       |        |                  |                            |        |       |      |      |       |       |      |      |       |       |      |      |       |       |      |      |
| SES group                                                                                                                                                                                                                                                                                                                                                                                                                                                                                                                                                                                                                                                                                                                                                                                                                                                                                                                                                                                                                                                                                                                                                                                                                                                                                                                                                                                                                                                                                                                                                                                                                                                                                                                                                                                                                                                                                                                                                                                                                                                                                                                                                                                                                                                                                                                                                                                                                                                                                                                                                                                                                                                                                                                                                                                                                                                                                                                                         | -0.113  | 0.003 | 0.09   | 0.26             | 0.218   | 0.003 | <0.001 | <b>&lt;0.01</b>  | 0.145   | 0.005 | 0.04   | 0.08             | 0.194   | 0.004 | <0.01  | <b>0.01</b>      |  |    |  |  |  |    |  |  |  |    |  |  |  |    |  |  |  |         |    |     |     |         |    |     |     |         |    |     |     |         |    |     |     |                        |  |  |  |  |  |  |  |  |  |  |  |  |  |  |  |  |                  |       |       |      |      |        |       |      |      |        |       |      |      |        |       |      |      |           |       |       |      |      |        |       |      |      |       |       |      |             |        |       |      |      |     |        |       |      |      |       |       |      |      |        |       |      |      |       |       |      |      |           |        |       |      |      |        |       |      |      |        |       |      |      |       |       |      |      |                |        |       |      |      |       |       |      |      |       |       |      |      |        |       |      |      |          |       |       |      |      |        |       |      |      |        |       |      |      |        |       |      |      |             |       |       |        |                  |        |       |        |                  |        |       |      |             |        |       |        |                  |                            |        |       |      |      |       |       |      |      |       |       |      |      |       |       |      |      |
| Sex                                                                                                                                                                                                                                                                                                                                                                                                                                                                                                                                                                                                                                                                                                                                                                                                                                                                                                                                                                                                                                                                                                                                                                                                                                                                                                                                                                                                                                                                                                                                                                                                                                                                                                                                                                                                                                                                                                                                                                                                                                                                                                                                                                                                                                                                                                                                                                                                                                                                                                                                                                                                                                                                                                                                                                                                                                                                                                                                               | -0.070  | 0.003 | 0.28   | 0.51             | -0.171  | 0.003 | <0.01  | <b>0.02</b>      | -0.212  | 0.004 | 0.00   | <b>0.01</b>      | -0.128  | 0.003 | 0.02   | 0.18             |  |    |  |  |  |    |  |  |  |    |  |  |  |    |  |  |  |         |    |     |     |         |    |     |     |         |    |     |     |         |    |     |     |                        |  |  |  |  |  |  |  |  |  |  |  |  |  |  |  |  |                  |       |       |      |      |        |       |      |      |        |       |      |      |        |       |      |      |           |       |       |      |      |        |       |      |      |       |       |      |             |        |       |      |      |     |        |       |      |      |       |       |      |      |        |       |      |      |       |       |      |      |           |        |       |      |      |        |       |      |      |        |       |      |      |       |       |      |      |                |        |       |      |      |       |       |      |      |       |       |      |      |        |       |      |      |          |       |       |      |      |        |       |      |      |        |       |      |      |        |       |      |      |             |       |       |        |                  |        |       |        |                  |        |       |      |             |        |       |        |                  |                            |        |       |      |      |       |       |      |      |       |       |      |      |       |       |      |      |
| NICU stay                                                                                                                                                                                                                                                                                                                                                                                                                                                                                                                                                                                                                                                                                                                                                                                                                                                                                                                                                                                                                                                                                                                                                                                                                                                                                                                                                                                                                                                                                                                                                                                                                                                                                                                                                                                                                                                                                                                                                                                                                                                                                                                                                                                                                                                                                                                                                                                                                                                                                                                                                                                                                                                                                                                                                                                                                                                                                                                                         | -0.096  | 0.006 | 0.23   | 0.53             | 0.045   | 0.007 | 0.52   | 0.86             | -0.041  | 0.010 | 0.62   | 0.97             | 0.089   | 0.008 | 0.19   | 0.78             |  |    |  |  |  |    |  |  |  |    |  |  |  |    |  |  |  |         |    |     |     |         |    |     |     |         |    |     |     |         |    |     |     |                        |  |  |  |  |  |  |  |  |  |  |  |  |  |  |  |  |                  |       |       |      |      |        |       |      |      |        |       |      |      |        |       |      |      |           |       |       |      |      |        |       |      |      |       |       |      |             |        |       |      |      |     |        |       |      |      |       |       |      |      |        |       |      |      |       |       |      |      |           |        |       |      |      |        |       |      |      |        |       |      |      |       |       |      |      |                |        |       |      |      |       |       |      |      |       |       |      |      |        |       |      |      |          |       |       |      |      |        |       |      |      |        |       |      |      |        |       |      |      |             |       |       |        |                  |        |       |        |                  |        |       |      |             |        |       |        |                  |                            |        |       |      |      |       |       |      |      |       |       |      |      |       |       |      |      |
| GA at delivery                                                                                                                                                                                                                                                                                                                                                                                                                                                                                                                                                                                                                                                                                                                                                                                                                                                                                                                                                                                                                                                                                                                                                                                                                                                                                                                                                                                                                                                                                                                                                                                                                                                                                                                                                                                                                                                                                                                                                                                                                                                                                                                                                                                                                                                                                                                                                                                                                                                                                                                                                                                                                                                                                                                                                                                                                                                                                                                                    | -0.129  | 0.001 | 0.14   | 0.42             | 0.042   | 0.001 | 0.57   | 0.81             | -0.076  | 0.001 | 0.41   | 0.60             | 0.103   | 0.001 | 0.16   | 0.81             |  |    |  |  |  |    |  |  |  |    |  |  |  |    |  |  |  |         |    |     |     |         |    |     |     |         |    |     |     |         |    |     |     |                        |  |  |  |  |  |  |  |  |  |  |  |  |  |  |  |  |                  |       |       |      |      |        |       |      |      |        |       |      |      |        |       |      |      |           |       |       |      |      |        |       |      |      |       |       |      |             |        |       |      |      |     |        |       |      |      |       |       |      |      |        |       |      |      |       |       |      |      |           |        |       |      |      |        |       |      |      |        |       |      |      |       |       |      |      |                |        |       |      |      |       |       |      |      |       |       |      |      |        |       |      |      |          |       |       |      |      |        |       |      |      |        |       |      |      |        |       |      |      |             |       |       |        |                  |        |       |        |                  |        |       |      |             |        |       |        |                  |                            |        |       |      |      |       |       |      |      |       |       |      |      |       |       |      |      |
| GA at T2                                                                                                                                                                                                                                                                                                                                                                                                                                                                                                                                                                                                                                                                                                                                                                                                                                                                                                                                                                                                                                                                                                                                                                                                                                                                                                                                                                                                                                                                                                                                                                                                                                                                                                                                                                                                                                                                                                                                                                                                                                                                                                                                                                                                                                                                                                                                                                                                                                                                                                                                                                                                                                                                                                                                                                                                                                                                                                                                          | 0.033   | 0.000 | 0.61   | 0.80             | 0.070   | 0.000 | 0.22   | 0.82             | 0.099   | 0.001 | 0.15   | 0.35             | 0.061   | 0.000 | 0.28   | 1.00             |  |    |  |  |  |    |  |  |  |    |  |  |  |    |  |  |  |         |    |     |     |         |    |     |     |         |    |     |     |         |    |     |     |                        |  |  |  |  |  |  |  |  |  |  |  |  |  |  |  |  |                  |       |       |      |      |        |       |      |      |        |       |      |      |        |       |      |      |           |       |       |      |      |        |       |      |      |       |       |      |             |        |       |      |      |     |        |       |      |      |       |       |      |      |        |       |      |      |       |       |      |      |           |        |       |      |      |        |       |      |      |        |       |      |      |       |       |      |      |                |        |       |      |      |       |       |      |      |       |       |      |      |        |       |      |      |          |       |       |      |      |        |       |      |      |        |       |      |      |        |       |      |      |             |       |       |        |                  |        |       |        |                  |        |       |      |             |        |       |        |                  |                            |        |       |      |      |       |       |      |      |       |       |      |      |       |       |      |      |
| PMA at scan                                                                                                                                                                                                                                                                                                                                                                                                                                                                                                                                                                                                                                                                                                                                                                                                                                                                                                                                                                                                                                                                                                                                                                                                                                                                                                                                                                                                                                                                                                                                                                                                                                                                                                                                                                                                                                                                                                                                                                                                                                                                                                                                                                                                                                                                                                                                                                                                                                                                                                                                                                                                                                                                                                                                                                                                                                                                                                                                       | 0.486   | 0.001 | <0.001 | <b>&lt;0.001</b> | -0.642  | 0.001 | <0.001 | <b>&lt;0.001</b> | -0.311  | 0.001 | <0.001 | <b>&lt;0.001</b> | -0.687  | 0.001 | <0.001 | <b>&lt;0.001</b> |  |    |  |  |  |    |  |  |  |    |  |  |  |    |  |  |  |         |    |     |     |         |    |     |     |         |    |     |     |         |    |     |     |                        |  |  |  |  |  |  |  |  |  |  |  |  |  |  |  |  |                  |       |       |      |      |        |       |      |      |        |       |      |      |        |       |      |      |           |       |       |      |      |        |       |      |      |       |       |      |             |        |       |      |      |     |        |       |      |      |       |       |      |      |        |       |      |      |       |       |      |      |           |        |       |      |      |        |       |      |      |        |       |      |      |       |       |      |      |                |        |       |      |      |       |       |      |      |       |       |      |      |        |       |      |      |          |       |       |      |      |        |       |      |      |        |       |      |      |        |       |      |      |             |       |       |        |                  |        |       |        |                  |        |       |      |             |        |       |        |                  |                            |        |       |      |      |       |       |      |      |       |       |      |      |       |       |      |      |
| TNF- $\alpha$ T2:SES group                                                                                                                                                                                                                                                                                                                                                                                                                                                                                                                                                                                                                                                                                                                                                                                                                                                                                                                                                                                                                                                                                                                                                                                                                                                                                                                                                                                                                                                                                                                                                                                                                                                                                                                                                                                                                                                                                                                                                                                                                                                                                                                                                                                                                                                                                                                                                                                                                                                                                                                                                                                                                                                                                                                                                                                                                                                                                                                        | 0.081   | 0.003 | 0.29   | 0.66             | 0.032   | 0.003 | 0.63   | 0.81             | 0.092   | 0.005 | 0.26   | 0.65             | -0.013  | 0.004 | 0.84   | 1.00             |  |    |  |  |  |    |  |  |  |    |  |  |  |    |  |  |  |         |    |     |     |         |    |     |     |         |    |     |     |         |    |     |     |                        |  |  |  |  |  |  |  |  |  |  |  |  |  |  |  |  |                  |       |       |      |      |        |       |      |      |        |       |      |      |        |       |      |      |           |       |       |      |      |        |       |      |      |       |       |      |             |        |       |      |      |     |        |       |      |      |       |       |      |      |        |       |      |      |       |       |      |      |           |        |       |      |      |        |       |      |      |        |       |      |      |       |       |      |      |                |        |       |      |      |       |       |      |      |       |       |      |      |        |       |      |      |          |       |       |      |      |        |       |      |      |        |       |      |      |        |       |      |      |             |       |       |        |                  |        |       |        |                  |        |       |      |             |        |       |        |                  |                            |        |       |      |      |       |       |      |      |       |       |      |      |       |       |      |      |
| <b>Fornix</b>                                                                                                                                                                                                                                                                                                                                                                                                                                                                                                                                                                                                                                                                                                                                                                                                                                                                                                                                                                                                                                                                                                                                                                                                                                                                                                                                                                                                                                                                                                                                                                                                                                                                                                                                                                                                                                                                                                                                                                                                                                                                                                                                                                                                                                                                                                                                                                                                                                                                                                                                                                                                                                                                                                                                                                                                                                                                                                                                     |         |       |        |                  |         |       |        |                  |         |       |        |                  |         |       |        |                  |  |    |  |  |  |    |  |  |  |    |  |  |  |    |  |  |  |         |    |     |     |         |    |     |     |         |    |     |     |         |    |     |     |                        |  |  |  |  |  |  |  |  |  |  |  |  |  |  |  |  |                  |       |       |      |      |        |       |      |      |        |       |      |      |        |       |      |      |           |       |       |      |      |        |       |      |      |       |       |      |             |        |       |      |      |     |        |       |      |      |       |       |      |      |        |       |      |      |       |       |      |      |           |        |       |      |      |        |       |      |      |        |       |      |      |       |       |      |      |                |        |       |      |      |       |       |      |      |       |       |      |      |        |       |      |      |          |       |       |      |      |        |       |      |      |        |       |      |      |        |       |      |      |             |       |       |        |                  |        |       |        |                  |        |       |      |             |        |       |        |                  |                            |        |       |      |      |       |       |      |      |       |       |      |      |       |       |      |      |
| TNF- $\alpha$ T2                                                                                                                                                                                                                                                                                                                                                                                                                                                                                                                                                                                                                                                                                                                                                                                                                                                                                                                                                                                                                                                                                                                                                                                                                                                                                                                                                                                                                                                                                                                                                                                                                                                                                                                                                                                                                                                                                                                                                                                                                                                                                                                                                                                                                                                                                                                                                                                                                                                                                                                                                                                                                                                                                                                                                                                                                                                                                                                                  | -0.077  | 0.001 | 0.33   | 0.56             | -0.053  | 0.002 | 0.44   | 0.94             | -0.109  | 0.003 | 0.16   | 0.72             | -0.014  | 0.002 | 0.84   | 0.94             |  |    |  |  |  |    |  |  |  |    |  |  |  |    |  |  |  |         |    |     |     |         |    |     |     |         |    |     |     |         |    |     |     |                        |  |  |  |  |  |  |  |  |  |  |  |  |  |  |  |  |                  |       |       |      |      |        |       |      |      |        |       |      |      |        |       |      |      |           |       |       |      |      |        |       |      |      |       |       |      |             |        |       |      |      |     |        |       |      |      |       |       |      |      |        |       |      |      |       |       |      |      |           |        |       |      |      |        |       |      |      |        |       |      |      |       |       |      |      |                |        |       |      |      |       |       |      |      |       |       |      |      |        |       |      |      |          |       |       |      |      |        |       |      |      |        |       |      |      |        |       |      |      |             |       |       |        |                  |        |       |        |                  |        |       |      |             |        |       |        |                  |                            |        |       |      |      |       |       |      |      |       |       |      |      |       |       |      |      |
| SES group                                                                                                                                                                                                                                                                                                                                                                                                                                                                                                                                                                                                                                                                                                                                                                                                                                                                                                                                                                                                                                                                                                                                                                                                                                                                                                                                                                                                                                                                                                                                                                                                                                                                                                                                                                                                                                                                                                                                                                                                                                                                                                                                                                                                                                                                                                                                                                                                                                                                                                                                                                                                                                                                                                                                                                                                                                                                                                                                         | -0.169  | 0.002 | 0.01   | 0.05             | 0.079   | 0.004 | 0.18   | 0.26             | 0.004   | 0.005 | 0.95   | 0.96             | 0.118   | 0.004 | 0.04   | 0.12             |  |    |  |  |  |    |  |  |  |    |  |  |  |    |  |  |  |         |    |     |     |         |    |     |     |         |    |     |     |         |    |     |     |                        |  |  |  |  |  |  |  |  |  |  |  |  |  |  |  |  |                  |       |       |      |      |        |       |      |      |        |       |      |      |        |       |      |      |           |       |       |      |      |        |       |      |      |       |       |      |             |        |       |      |      |     |        |       |      |      |       |       |      |      |        |       |      |      |       |       |      |      |           |        |       |      |      |        |       |      |      |        |       |      |      |       |       |      |      |                |        |       |      |      |       |       |      |      |       |       |      |      |        |       |      |      |          |       |       |      |      |        |       |      |      |        |       |      |      |        |       |      |      |             |       |       |        |                  |        |       |        |                  |        |       |      |             |        |       |        |                  |                            |        |       |      |      |       |       |      |      |       |       |      |      |       |       |      |      |
| Sex                                                                                                                                                                                                                                                                                                                                                                                                                                                                                                                                                                                                                                                                                                                                                                                                                                                                                                                                                                                                                                                                                                                                                                                                                                                                                                                                                                                                                                                                                                                                                                                                                                                                                                                                                                                                                                                                                                                                                                                                                                                                                                                                                                                                                                                                                                                                                                                                                                                                                                                                                                                                                                                                                                                                                                                                                                                                                                                                               | -0.126  | 0.002 | 0.06   | 0.51             | -0.036  | 0.003 | 0.52   | 0.89             | -0.100  | 0.005 | 0.12   | 0.28             | 0.009   | 0.004 | 0.88   | 0.88             |  |    |  |  |  |    |  |  |  |    |  |  |  |    |  |  |  |         |    |     |     |         |    |     |     |         |    |     |     |         |    |     |     |                        |  |  |  |  |  |  |  |  |  |  |  |  |  |  |  |  |                  |       |       |      |      |        |       |      |      |        |       |      |      |        |       |      |      |           |       |       |      |      |        |       |      |      |       |       |      |             |        |       |      |      |     |        |       |      |      |       |       |      |      |        |       |      |      |       |       |      |      |           |        |       |      |      |        |       |      |      |        |       |      |      |       |       |      |      |                |        |       |      |      |       |       |      |      |       |       |      |      |        |       |      |      |          |       |       |      |      |        |       |      |      |        |       |      |      |        |       |      |      |             |       |       |        |                  |        |       |        |                  |        |       |      |             |        |       |        |                  |                            |        |       |      |      |       |       |      |      |       |       |      |      |       |       |      |      |
| NICU stay                                                                                                                                                                                                                                                                                                                                                                                                                                                                                                                                                                                                                                                                                                                                                                                                                                                                                                                                                                                                                                                                                                                                                                                                                                                                                                                                                                                                                                                                                                                                                                                                                                                                                                                                                                                                                                                                                                                                                                                                                                                                                                                                                                                                                                                                                                                                                                                                                                                                                                                                                                                                                                                                                                                                                                                                                                                                                                                                         | 0.030   | 0.005 | 0.72   | 0.82             | -0.012  | 0.008 | 0.86   | 0.86             | -0.004  | 0.011 | 0.96   | 0.97             | -0.016  | 0.008 | 0.82   | 0.92             |  |    |  |  |  |    |  |  |  |    |  |  |  |    |  |  |  |         |    |     |     |         |    |     |     |         |    |     |     |         |    |     |     |                        |  |  |  |  |  |  |  |  |  |  |  |  |  |  |  |  |                  |       |       |      |      |        |       |      |      |        |       |      |      |        |       |      |      |           |       |       |      |      |        |       |      |      |       |       |      |             |        |       |      |      |     |        |       |      |      |       |       |      |      |        |       |      |      |       |       |      |      |           |        |       |      |      |        |       |      |      |        |       |      |      |       |       |      |      |                |        |       |      |      |       |       |      |      |       |       |      |      |        |       |      |      |          |       |       |      |      |        |       |      |      |        |       |      |      |        |       |      |      |             |       |       |        |                  |        |       |        |                  |        |       |      |             |        |       |        |                  |                            |        |       |      |      |       |       |      |      |       |       |      |      |       |       |      |      |
| GA at delivery                                                                                                                                                                                                                                                                                                                                                                                                                                                                                                                                                                                                                                                                                                                                                                                                                                                                                                                                                                                                                                                                                                                                                                                                                                                                                                                                                                                                                                                                                                                                                                                                                                                                                                                                                                                                                                                                                                                                                                                                                                                                                                                                                                                                                                                                                                                                                                                                                                                                                                                                                                                                                                                                                                                                                                                                                                                                                                                                    | 0.075   | 0.001 | 0.40   | 0.64             | 0.018   | 0.001 | 0.81   | 0.81             | 0.063   | 0.002 | 0.47   | 0.60             | -0.009  | 0.001 | 0.91   | 0.91             |  |    |  |  |  |    |  |  |  |    |  |  |  |    |  |  |  |         |    |     |     |         |    |     |     |         |    |     |     |         |    |     |     |                        |  |  |  |  |  |  |  |  |  |  |  |  |  |  |  |  |                  |       |       |      |      |        |       |      |      |        |       |      |      |        |       |      |      |           |       |       |      |      |        |       |      |      |       |       |      |             |        |       |      |      |     |        |       |      |      |       |       |      |      |        |       |      |      |       |       |      |      |           |        |       |      |      |        |       |      |      |        |       |      |      |       |       |      |      |                |        |       |      |      |       |       |      |      |       |       |      |      |        |       |      |      |          |       |       |      |      |        |       |      |      |        |       |      |      |        |       |      |      |             |       |       |        |                  |        |       |        |                  |        |       |      |             |        |       |        |                  |                            |        |       |      |      |       |       |      |      |       |       |      |      |       |       |      |      |
| GA at T2                                                                                                                                                                                                                                                                                                                                                                                                                                                                                                                                                                                                                                                                                                                                                                                                                                                                                                                                                                                                                                                                                                                                                                                                                                                                                                                                                                                                                                                                                                                                                                                                                                                                                                                                                                                                                                                                                                                                                                                                                                                                                                                                                                                                                                                                                                                                                                                                                                                                                                                                                                                                                                                                                                                                                                                                                                                                                                                                          | 0.005   | 0.000 | 0.94   | 0.94             | -0.002  | 0.000 | 0.98   | 0.99             | -0.006  | 0.001 | 0.93   | 0.93             | 0.000   | 0.001 | 1.00   | 1.00             |  |    |  |  |  |    |  |  |  |    |  |  |  |    |  |  |  |         |    |     |     |         |    |     |     |         |    |     |     |         |    |     |     |                        |  |  |  |  |  |  |  |  |  |  |  |  |  |  |  |  |                  |       |       |      |      |        |       |      |      |        |       |      |      |        |       |      |      |           |       |       |      |      |        |       |      |      |       |       |      |             |        |       |      |      |     |        |       |      |      |       |       |      |      |        |       |      |      |       |       |      |      |           |        |       |      |      |        |       |      |      |        |       |      |      |       |       |      |      |                |        |       |      |      |       |       |      |      |       |       |      |      |        |       |      |      |          |       |       |      |      |        |       |      |      |        |       |      |      |        |       |      |      |             |       |       |        |                  |        |       |        |                  |        |       |      |             |        |       |        |                  |                            |        |       |      |      |       |       |      |      |       |       |      |      |       |       |      |      |
| PMA at scan                                                                                                                                                                                                                                                                                                                                                                                                                                                                                                                                                                                                                                                                                                                                                                                                                                                                                                                                                                                                                                                                                                                                                                                                                                                                                                                                                                                                                                                                                                                                                                                                                                                                                                                                                                                                                                                                                                                                                                                                                                                                                                                                                                                                                                                                                                                                                                                                                                                                                                                                                                                                                                                                                                                                                                                                                                                                                                                                       | 0.410   | 0.001 | <0.001 | <b>&lt;0.001</b> | -0.651  | 0.001 | <0.001 | <b>&lt;0.001</b> | -0.478  | 0.002 | <0.001 | <b>&lt;0.001</b> | -0.667  | 0.001 | <0.001 | <b>&lt;0.001</b> |  |    |  |  |  |    |  |  |  |    |  |  |  |    |  |  |  |         |    |     |     |         |    |     |     |         |    |     |     |         |    |     |     |                        |  |  |  |  |  |  |  |  |  |  |  |  |  |  |  |  |                  |       |       |      |      |        |       |      |      |        |       |      |      |        |       |      |      |           |       |       |      |      |        |       |      |      |       |       |      |             |        |       |      |      |     |        |       |      |      |       |       |      |      |        |       |      |      |       |       |      |      |           |        |       |      |      |        |       |      |      |        |       |      |      |       |       |      |      |                |        |       |      |      |       |       |      |      |       |       |      |      |        |       |      |      |          |       |       |      |      |        |       |      |      |        |       |      |      |        |       |      |      |             |       |       |        |                  |        |       |        |                  |        |       |      |             |        |       |        |                  |                            |        |       |      |      |       |       |      |      |       |       |      |      |       |       |      |      |
| TNF- $\alpha$ T2:SES group                                                                                                                                                                                                                                                                                                                                                                                                                                                                                                                                                                                                                                                                                                                                                                                                                                                                                                                                                                                                                                                                                                                                                                                                                                                                                                                                                                                                                                                                                                                                                                                                                                                                                                                                                                                                                                                                                                                                                                                                                                                                                                                                                                                                                                                                                                                                                                                                                                                                                                                                                                                                                                                                                                                                                                                                                                                                                                                        | 0.085   | 0.002 | 0.28   | 0.66             | 0.048   | 0.004 | 0.48   | 0.74             | 0.139   | 0.005 | 0.07   | 0.65             | -0.001  | 0.004 | 0.99   | 1.00             |  |    |  |  |  |    |  |  |  |    |  |  |  |    |  |  |  |         |    |     |     |         |    |     |     |         |    |     |     |         |    |     |     |                        |  |  |  |  |  |  |  |  |  |  |  |  |  |  |  |  |                  |       |       |      |      |        |       |      |      |        |       |      |      |        |       |      |      |           |       |       |      |      |        |       |      |      |       |       |      |             |        |       |      |      |     |        |       |      |      |       |       |      |      |        |       |      |      |       |       |      |      |           |        |       |      |      |        |       |      |      |        |       |      |      |       |       |      |      |                |        |       |      |      |       |       |      |      |       |       |      |      |        |       |      |      |          |       |       |      |      |        |       |      |      |        |       |      |      |        |       |      |      |             |       |       |        |                  |        |       |        |                  |        |       |      |             |        |       |        |                  |                            |        |       |      |      |       |       |      |      |       |       |      |      |       |       |      |      |
| <b>TNF-<math>\alpha</math> Trimester 3</b>                                                                                                                                                                                                                                                                                                                                                                                                                                                                                                                                                                                                                                                                                                                                                                                                                                                                                                                                                                                                                                                                                                                                                                                                                                                                                                                                                                                                                                                                                                                                                                                                                                                                                                                                                                                                                                                                                                                                                                                                                                                                                                                                                                                                                                                                                                                                                                                                                                                                                                                                                                                                                                                                                                                                                                                                                                                                                                        |         |       |        |                  |         |       |        |                  |         |       |        |                  |         |       |        |                  |  |    |  |  |  |    |  |  |  |    |  |  |  |    |  |  |  |         |    |     |     |         |    |     |     |         |    |     |     |         |    |     |     |                        |  |  |  |  |  |  |  |  |  |  |  |  |  |  |  |  |                  |       |       |      |      |        |       |      |      |        |       |      |      |        |       |      |      |           |       |       |      |      |        |       |      |      |       |       |      |             |        |       |      |      |     |        |       |      |      |       |       |      |      |        |       |      |      |       |       |      |      |           |        |       |      |      |        |       |      |      |        |       |      |      |       |       |      |      |                |        |       |      |      |       |       |      |      |       |       |      |      |        |       |      |      |          |       |       |      |      |        |       |      |      |        |       |      |      |        |       |      |      |             |       |       |        |                  |        |       |        |                  |        |       |      |             |        |       |        |                  |                            |        |       |      |      |       |       |      |      |       |       |      |      |       |       |      |      |
| <table border="1"> <thead> <tr> <th rowspan="2"></th> <th colspan="4">FA</th> <th colspan="4">MD</th> <th colspan="4">AD</th> <th colspan="4">RD</th> </tr> <tr> <th><math>\beta</math></th> <th>SE</th> <th><math>p</math></th> <th><math>q</math></th> <th><math>\beta</math></th> <th>SE</th> <th><math>p</math></th> <th><math>q</math></th> <th><math>\beta</math></th> <th>SE</th> <th><math>p</math></th> <th><math>q</math></th> <th><math>\beta</math></th> <th>SE</th> <th><math>p</math></th> <th><math>q</math></th> </tr> </thead> <tbody> <tr> <td colspan="17"><b>Corpus Callosum</b></td> </tr> <tr> <td>TNF-<math>\alpha</math> T3</td> <td>0.077</td> <td>0.002</td> <td>0.26</td> <td>0.56</td> <td>-0.137</td> <td>0.002</td> <td>0.04</td> <td>0.11</td> <td>-0.113</td> <td>0.002</td> <td>0.15</td> <td>0.27</td> <td>-0.117</td> <td>0.003</td> <td>0.07</td> <td>0.19</td> </tr> <tr> <td>SES group</td> <td>0.116</td> <td>0.004</td> <td>0.05</td> <td>0.14</td> <td>-0.012</td> <td>0.004</td> <td>0.83</td> <td>0.83</td> <td>0.174</td> <td>0.004</td> <td>0.01</td> <td><b>0.01</b></td> <td>-0.058</td> <td>0.005</td> <td>0.29</td> <td>0.29</td> </tr> <tr> <td>Sex</td> <td>-0.133</td> <td>0.003</td> <td>0.02</td> <td>0.14</td> <td>0.003</td> <td>0.003</td> <td>0.96</td> <td>0.96</td> <td>-0.093</td> <td>0.004</td> <td>0.14</td> <td>0.25</td> <td>0.068</td> <td>0.005</td> <td>0.19</td> <td>0.56</td> </tr> <tr> <td>NICU stay</td> <td>-0.063</td> <td>0.009</td> <td>0.31</td> <td>0.64</td> <td>-0.024</td> <td>0.009</td> <td>0.70</td> <td>0.90</td> <td>-0.019</td> <td>0.010</td> <td>0.79</td> <td>0.79</td> <td>0.003</td> <td>0.013</td> <td>0.96</td> <td>0.97</td> </tr> <tr> <td>GA at delivery</td> <td>-0.023</td> <td>0.001</td> <td>0.74</td> <td>0.84</td> <td>0.005</td> <td>0.001</td> <td>0.94</td> <td>0.96</td> <td>0.046</td> <td>0.002</td> <td>0.57</td> <td>0.97</td> <td>-0.008</td> <td>0.002</td> <td>0.91</td> <td>0.98</td> </tr> <tr> <td>GA at T3</td> <td>0.021</td> <td>0.001</td> <td>0.72</td> <td>0.93</td> <td>-0.038</td> <td>0.001</td> <td>0.50</td> <td>0.64</td> <td>-0.043</td> <td>0.001</td> <td>0.52</td> <td>0.60</td> <td>-0.042</td> <td>0.001</td> <td>0.45</td> <td>0.76</td> </tr> <tr> <td>PMA at scan</td> <td>0.467</td> <td>0.001</td> <td>&lt;0.001</td> <td><b>&lt;0.001</b></td> <td>-0.569</td> <td>0.001</td> <td>&lt;0.001</td> <td><b>&lt;0.001</b></td> <td>-0.182</td> <td>0.002</td> <td>0.01</td> <td><b>0.01</b></td> <td>-0.563</td> <td>0.002</td> <td>&lt;0.001</td> <td><b>&lt;0.001</b></td> </tr> <tr> <td>TNF-<math>\alpha</math> T3:SES group</td> <td>-0.044</td> <td>0.003</td> <td>0.52</td> <td>0.59</td> <td>0.049</td> <td>0.004</td> <td>0.46</td> <td>0.46</td> <td>0.034</td> <td>0.004</td> <td>0.66</td> <td>0.66</td> <td>0.044</td> <td>0.005</td> <td>0.49</td> <td>0.56</td> </tr> </tbody> </table> |         |       |        |                  |         |       |        |                  |         |       |        |                  |         |       |        |                  |  | FA |  |  |  | MD |  |  |  | AD |  |  |  | RD |  |  |  | $\beta$ | SE | $p$ | $q$ | $\beta$ | SE | $p$ | $q$ | $\beta$ | SE | $p$ | $q$ | $\beta$ | SE | $p$ | $q$ | <b>Corpus Callosum</b> |  |  |  |  |  |  |  |  |  |  |  |  |  |  |  |  | TNF- $\alpha$ T3 | 0.077 | 0.002 | 0.26 | 0.56 | -0.137 | 0.002 | 0.04 | 0.11 | -0.113 | 0.002 | 0.15 | 0.27 | -0.117 | 0.003 | 0.07 | 0.19 | SES group | 0.116 | 0.004 | 0.05 | 0.14 | -0.012 | 0.004 | 0.83 | 0.83 | 0.174 | 0.004 | 0.01 | <b>0.01</b> | -0.058 | 0.005 | 0.29 | 0.29 | Sex | -0.133 | 0.003 | 0.02 | 0.14 | 0.003 | 0.003 | 0.96 | 0.96 | -0.093 | 0.004 | 0.14 | 0.25 | 0.068 | 0.005 | 0.19 | 0.56 | NICU stay | -0.063 | 0.009 | 0.31 | 0.64 | -0.024 | 0.009 | 0.70 | 0.90 | -0.019 | 0.010 | 0.79 | 0.79 | 0.003 | 0.013 | 0.96 | 0.97 | GA at delivery | -0.023 | 0.001 | 0.74 | 0.84 | 0.005 | 0.001 | 0.94 | 0.96 | 0.046 | 0.002 | 0.57 | 0.97 | -0.008 | 0.002 | 0.91 | 0.98 | GA at T3 | 0.021 | 0.001 | 0.72 | 0.93 | -0.038 | 0.001 | 0.50 | 0.64 | -0.043 | 0.001 | 0.52 | 0.60 | -0.042 | 0.001 | 0.45 | 0.76 | PMA at scan | 0.467 | 0.001 | <0.001 | <b>&lt;0.001</b> | -0.569 | 0.001 | <0.001 | <b>&lt;0.001</b> | -0.182 | 0.002 | 0.01 | <b>0.01</b> | -0.563 | 0.002 | <0.001 | <b>&lt;0.001</b> | TNF- $\alpha$ T3:SES group | -0.044 | 0.003 | 0.52 | 0.59 | 0.049 | 0.004 | 0.46 | 0.46 | 0.034 | 0.004 | 0.66 | 0.66 | 0.044 | 0.005 | 0.49 | 0.56 |
|                                                                                                                                                                                                                                                                                                                                                                                                                                                                                                                                                                                                                                                                                                                                                                                                                                                                                                                                                                                                                                                                                                                                                                                                                                                                                                                                                                                                                                                                                                                                                                                                                                                                                                                                                                                                                                                                                                                                                                                                                                                                                                                                                                                                                                                                                                                                                                                                                                                                                                                                                                                                                                                                                                                                                                                                                                                                                                                                                   | FA      |       |        |                  | MD      |       |        |                  | AD      |       |        |                  | RD      |       |        |                  |  |    |  |  |  |    |  |  |  |    |  |  |  |    |  |  |  |         |    |     |     |         |    |     |     |         |    |     |     |         |    |     |     |                        |  |  |  |  |  |  |  |  |  |  |  |  |  |  |  |  |                  |       |       |      |      |        |       |      |      |        |       |      |      |        |       |      |      |           |       |       |      |      |        |       |      |      |       |       |      |             |        |       |      |      |     |        |       |      |      |       |       |      |      |        |       |      |      |       |       |      |      |           |        |       |      |      |        |       |      |      |        |       |      |      |       |       |      |      |                |        |       |      |      |       |       |      |      |       |       |      |      |        |       |      |      |          |       |       |      |      |        |       |      |      |        |       |      |      |        |       |      |      |             |       |       |        |                  |        |       |        |                  |        |       |      |             |        |       |        |                  |                            |        |       |      |      |       |       |      |      |       |       |      |      |       |       |      |      |
|                                                                                                                                                                                                                                                                                                                                                                                                                                                                                                                                                                                                                                                                                                                                                                                                                                                                                                                                                                                                                                                                                                                                                                                                                                                                                                                                                                                                                                                                                                                                                                                                                                                                                                                                                                                                                                                                                                                                                                                                                                                                                                                                                                                                                                                                                                                                                                                                                                                                                                                                                                                                                                                                                                                                                                                                                                                                                                                                                   | $\beta$ | SE    | $p$    | $q$              | $\beta$ | SE    | $p$    | $q$              | $\beta$ | SE    | $p$    | $q$              | $\beta$ | SE    | $p$    | $q$              |  |    |  |  |  |    |  |  |  |    |  |  |  |    |  |  |  |         |    |     |     |         |    |     |     |         |    |     |     |         |    |     |     |                        |  |  |  |  |  |  |  |  |  |  |  |  |  |  |  |  |                  |       |       |      |      |        |       |      |      |        |       |      |      |        |       |      |      |           |       |       |      |      |        |       |      |      |       |       |      |             |        |       |      |      |     |        |       |      |      |       |       |      |      |        |       |      |      |       |       |      |      |           |        |       |      |      |        |       |      |      |        |       |      |      |       |       |      |      |                |        |       |      |      |       |       |      |      |       |       |      |      |        |       |      |      |          |       |       |      |      |        |       |      |      |        |       |      |      |        |       |      |      |             |       |       |        |                  |        |       |        |                  |        |       |      |             |        |       |        |                  |                            |        |       |      |      |       |       |      |      |       |       |      |      |       |       |      |      |
| <b>Corpus Callosum</b>                                                                                                                                                                                                                                                                                                                                                                                                                                                                                                                                                                                                                                                                                                                                                                                                                                                                                                                                                                                                                                                                                                                                                                                                                                                                                                                                                                                                                                                                                                                                                                                                                                                                                                                                                                                                                                                                                                                                                                                                                                                                                                                                                                                                                                                                                                                                                                                                                                                                                                                                                                                                                                                                                                                                                                                                                                                                                                                            |         |       |        |                  |         |       |        |                  |         |       |        |                  |         |       |        |                  |  |    |  |  |  |    |  |  |  |    |  |  |  |    |  |  |  |         |    |     |     |         |    |     |     |         |    |     |     |         |    |     |     |                        |  |  |  |  |  |  |  |  |  |  |  |  |  |  |  |  |                  |       |       |      |      |        |       |      |      |        |       |      |      |        |       |      |      |           |       |       |      |      |        |       |      |      |       |       |      |             |        |       |      |      |     |        |       |      |      |       |       |      |      |        |       |      |      |       |       |      |      |           |        |       |      |      |        |       |      |      |        |       |      |      |       |       |      |      |                |        |       |      |      |       |       |      |      |       |       |      |      |        |       |      |      |          |       |       |      |      |        |       |      |      |        |       |      |      |        |       |      |      |             |       |       |        |                  |        |       |        |                  |        |       |      |             |        |       |        |                  |                            |        |       |      |      |       |       |      |      |       |       |      |      |       |       |      |      |
| TNF- $\alpha$ T3                                                                                                                                                                                                                                                                                                                                                                                                                                                                                                                                                                                                                                                                                                                                                                                                                                                                                                                                                                                                                                                                                                                                                                                                                                                                                                                                                                                                                                                                                                                                                                                                                                                                                                                                                                                                                                                                                                                                                                                                                                                                                                                                                                                                                                                                                                                                                                                                                                                                                                                                                                                                                                                                                                                                                                                                                                                                                                                                  | 0.077   | 0.002 | 0.26   | 0.56             | -0.137  | 0.002 | 0.04   | 0.11             | -0.113  | 0.002 | 0.15   | 0.27             | -0.117  | 0.003 | 0.07   | 0.19             |  |    |  |  |  |    |  |  |  |    |  |  |  |    |  |  |  |         |    |     |     |         |    |     |     |         |    |     |     |         |    |     |     |                        |  |  |  |  |  |  |  |  |  |  |  |  |  |  |  |  |                  |       |       |      |      |        |       |      |      |        |       |      |      |        |       |      |      |           |       |       |      |      |        |       |      |      |       |       |      |             |        |       |      |      |     |        |       |      |      |       |       |      |      |        |       |      |      |       |       |      |      |           |        |       |      |      |        |       |      |      |        |       |      |      |       |       |      |      |                |        |       |      |      |       |       |      |      |       |       |      |      |        |       |      |      |          |       |       |      |      |        |       |      |      |        |       |      |      |        |       |      |      |             |       |       |        |                  |        |       |        |                  |        |       |      |             |        |       |        |                  |                            |        |       |      |      |       |       |      |      |       |       |      |      |       |       |      |      |
| SES group                                                                                                                                                                                                                                                                                                                                                                                                                                                                                                                                                                                                                                                                                                                                                                                                                                                                                                                                                                                                                                                                                                                                                                                                                                                                                                                                                                                                                                                                                                                                                                                                                                                                                                                                                                                                                                                                                                                                                                                                                                                                                                                                                                                                                                                                                                                                                                                                                                                                                                                                                                                                                                                                                                                                                                                                                                                                                                                                         | 0.116   | 0.004 | 0.05   | 0.14             | -0.012  | 0.004 | 0.83   | 0.83             | 0.174   | 0.004 | 0.01   | <b>0.01</b>      | -0.058  | 0.005 | 0.29   | 0.29             |  |    |  |  |  |    |  |  |  |    |  |  |  |    |  |  |  |         |    |     |     |         |    |     |     |         |    |     |     |         |    |     |     |                        |  |  |  |  |  |  |  |  |  |  |  |  |  |  |  |  |                  |       |       |      |      |        |       |      |      |        |       |      |      |        |       |      |      |           |       |       |      |      |        |       |      |      |       |       |      |             |        |       |      |      |     |        |       |      |      |       |       |      |      |        |       |      |      |       |       |      |      |           |        |       |      |      |        |       |      |      |        |       |      |      |       |       |      |      |                |        |       |      |      |       |       |      |      |       |       |      |      |        |       |      |      |          |       |       |      |      |        |       |      |      |        |       |      |      |        |       |      |      |             |       |       |        |                  |        |       |        |                  |        |       |      |             |        |       |        |                  |                            |        |       |      |      |       |       |      |      |       |       |      |      |       |       |      |      |
| Sex                                                                                                                                                                                                                                                                                                                                                                                                                                                                                                                                                                                                                                                                                                                                                                                                                                                                                                                                                                                                                                                                                                                                                                                                                                                                                                                                                                                                                                                                                                                                                                                                                                                                                                                                                                                                                                                                                                                                                                                                                                                                                                                                                                                                                                                                                                                                                                                                                                                                                                                                                                                                                                                                                                                                                                                                                                                                                                                                               | -0.133  | 0.003 | 0.02   | 0.14             | 0.003   | 0.003 | 0.96   | 0.96             | -0.093  | 0.004 | 0.14   | 0.25             | 0.068   | 0.005 | 0.19   | 0.56             |  |    |  |  |  |    |  |  |  |    |  |  |  |    |  |  |  |         |    |     |     |         |    |     |     |         |    |     |     |         |    |     |     |                        |  |  |  |  |  |  |  |  |  |  |  |  |  |  |  |  |                  |       |       |      |      |        |       |      |      |        |       |      |      |        |       |      |      |           |       |       |      |      |        |       |      |      |       |       |      |             |        |       |      |      |     |        |       |      |      |       |       |      |      |        |       |      |      |       |       |      |      |           |        |       |      |      |        |       |      |      |        |       |      |      |       |       |      |      |                |        |       |      |      |       |       |      |      |       |       |      |      |        |       |      |      |          |       |       |      |      |        |       |      |      |        |       |      |      |        |       |      |      |             |       |       |        |                  |        |       |        |                  |        |       |      |             |        |       |        |                  |                            |        |       |      |      |       |       |      |      |       |       |      |      |       |       |      |      |
| NICU stay                                                                                                                                                                                                                                                                                                                                                                                                                                                                                                                                                                                                                                                                                                                                                                                                                                                                                                                                                                                                                                                                                                                                                                                                                                                                                                                                                                                                                                                                                                                                                                                                                                                                                                                                                                                                                                                                                                                                                                                                                                                                                                                                                                                                                                                                                                                                                                                                                                                                                                                                                                                                                                                                                                                                                                                                                                                                                                                                         | -0.063  | 0.009 | 0.31   | 0.64             | -0.024  | 0.009 | 0.70   | 0.90             | -0.019  | 0.010 | 0.79   | 0.79             | 0.003   | 0.013 | 0.96   | 0.97             |  |    |  |  |  |    |  |  |  |    |  |  |  |    |  |  |  |         |    |     |     |         |    |     |     |         |    |     |     |         |    |     |     |                        |  |  |  |  |  |  |  |  |  |  |  |  |  |  |  |  |                  |       |       |      |      |        |       |      |      |        |       |      |      |        |       |      |      |           |       |       |      |      |        |       |      |      |       |       |      |             |        |       |      |      |     |        |       |      |      |       |       |      |      |        |       |      |      |       |       |      |      |           |        |       |      |      |        |       |      |      |        |       |      |      |       |       |      |      |                |        |       |      |      |       |       |      |      |       |       |      |      |        |       |      |      |          |       |       |      |      |        |       |      |      |        |       |      |      |        |       |      |      |             |       |       |        |                  |        |       |        |                  |        |       |      |             |        |       |        |                  |                            |        |       |      |      |       |       |      |      |       |       |      |      |       |       |      |      |
| GA at delivery                                                                                                                                                                                                                                                                                                                                                                                                                                                                                                                                                                                                                                                                                                                                                                                                                                                                                                                                                                                                                                                                                                                                                                                                                                                                                                                                                                                                                                                                                                                                                                                                                                                                                                                                                                                                                                                                                                                                                                                                                                                                                                                                                                                                                                                                                                                                                                                                                                                                                                                                                                                                                                                                                                                                                                                                                                                                                                                                    | -0.023  | 0.001 | 0.74   | 0.84             | 0.005   | 0.001 | 0.94   | 0.96             | 0.046   | 0.002 | 0.57   | 0.97             | -0.008  | 0.002 | 0.91   | 0.98             |  |    |  |  |  |    |  |  |  |    |  |  |  |    |  |  |  |         |    |     |     |         |    |     |     |         |    |     |     |         |    |     |     |                        |  |  |  |  |  |  |  |  |  |  |  |  |  |  |  |  |                  |       |       |      |      |        |       |      |      |        |       |      |      |        |       |      |      |           |       |       |      |      |        |       |      |      |       |       |      |             |        |       |      |      |     |        |       |      |      |       |       |      |      |        |       |      |      |       |       |      |      |           |        |       |      |      |        |       |      |      |        |       |      |      |       |       |      |      |                |        |       |      |      |       |       |      |      |       |       |      |      |        |       |      |      |          |       |       |      |      |        |       |      |      |        |       |      |      |        |       |      |      |             |       |       |        |                  |        |       |        |                  |        |       |      |             |        |       |        |                  |                            |        |       |      |      |       |       |      |      |       |       |      |      |       |       |      |      |
| GA at T3                                                                                                                                                                                                                                                                                                                                                                                                                                                                                                                                                                                                                                                                                                                                                                                                                                                                                                                                                                                                                                                                                                                                                                                                                                                                                                                                                                                                                                                                                                                                                                                                                                                                                                                                                                                                                                                                                                                                                                                                                                                                                                                                                                                                                                                                                                                                                                                                                                                                                                                                                                                                                                                                                                                                                                                                                                                                                                                                          | 0.021   | 0.001 | 0.72   | 0.93             | -0.038  | 0.001 | 0.50   | 0.64             | -0.043  | 0.001 | 0.52   | 0.60             | -0.042  | 0.001 | 0.45   | 0.76             |  |    |  |  |  |    |  |  |  |    |  |  |  |    |  |  |  |         |    |     |     |         |    |     |     |         |    |     |     |         |    |     |     |                        |  |  |  |  |  |  |  |  |  |  |  |  |  |  |  |  |                  |       |       |      |      |        |       |      |      |        |       |      |      |        |       |      |      |           |       |       |      |      |        |       |      |      |       |       |      |             |        |       |      |      |     |        |       |      |      |       |       |      |      |        |       |      |      |       |       |      |      |           |        |       |      |      |        |       |      |      |        |       |      |      |       |       |      |      |                |        |       |      |      |       |       |      |      |       |       |      |      |        |       |      |      |          |       |       |      |      |        |       |      |      |        |       |      |      |        |       |      |      |             |       |       |        |                  |        |       |        |                  |        |       |      |             |        |       |        |                  |                            |        |       |      |      |       |       |      |      |       |       |      |      |       |       |      |      |
| PMA at scan                                                                                                                                                                                                                                                                                                                                                                                                                                                                                                                                                                                                                                                                                                                                                                                                                                                                                                                                                                                                                                                                                                                                                                                                                                                                                                                                                                                                                                                                                                                                                                                                                                                                                                                                                                                                                                                                                                                                                                                                                                                                                                                                                                                                                                                                                                                                                                                                                                                                                                                                                                                                                                                                                                                                                                                                                                                                                                                                       | 0.467   | 0.001 | <0.001 | <b>&lt;0.001</b> | -0.569  | 0.001 | <0.001 | <b>&lt;0.001</b> | -0.182  | 0.002 | 0.01   | <b>0.01</b>      | -0.563  | 0.002 | <0.001 | <b>&lt;0.001</b> |  |    |  |  |  |    |  |  |  |    |  |  |  |    |  |  |  |         |    |     |     |         |    |     |     |         |    |     |     |         |    |     |     |                        |  |  |  |  |  |  |  |  |  |  |  |  |  |  |  |  |                  |       |       |      |      |        |       |      |      |        |       |      |      |        |       |      |      |           |       |       |      |      |        |       |      |      |       |       |      |             |        |       |      |      |     |        |       |      |      |       |       |      |      |        |       |      |      |       |       |      |      |           |        |       |      |      |        |       |      |      |        |       |      |      |       |       |      |      |                |        |       |      |      |       |       |      |      |       |       |      |      |        |       |      |      |          |       |       |      |      |        |       |      |      |        |       |      |      |        |       |      |      |             |       |       |        |                  |        |       |        |                  |        |       |      |             |        |       |        |                  |                            |        |       |      |      |       |       |      |      |       |       |      |      |       |       |      |      |
| TNF- $\alpha$ T3:SES group                                                                                                                                                                                                                                                                                                                                                                                                                                                                                                                                                                                                                                                                                                                                                                                                                                                                                                                                                                                                                                                                                                                                                                                                                                                                                                                                                                                                                                                                                                                                                                                                                                                                                                                                                                                                                                                                                                                                                                                                                                                                                                                                                                                                                                                                                                                                                                                                                                                                                                                                                                                                                                                                                                                                                                                                                                                                                                                        | -0.044  | 0.003 | 0.52   | 0.59             | 0.049   | 0.004 | 0.46   | 0.46             | 0.034   | 0.004 | 0.66   | 0.66             | 0.044   | 0.005 | 0.49   | 0.56             |  |    |  |  |  |    |  |  |  |    |  |  |  |    |  |  |  |         |    |     |     |         |    |     |     |         |    |     |     |         |    |     |     |                        |  |  |  |  |  |  |  |  |  |  |  |  |  |  |  |  |                  |       |       |      |      |        |       |      |      |        |       |      |      |        |       |      |      |           |       |       |      |      |        |       |      |      |       |       |      |             |        |       |      |      |     |        |       |      |      |       |       |      |      |        |       |      |      |       |       |      |      |           |        |       |      |      |        |       |      |      |        |       |      |      |       |       |      |      |                |        |       |      |      |       |       |      |      |       |       |      |      |        |       |      |      |          |       |       |      |      |        |       |      |      |        |       |      |      |        |       |      |      |             |       |       |        |                  |        |       |        |                  |        |       |      |             |        |       |        |                  |                            |        |       |      |      |       |       |      |      |       |       |      |      |       |       |      |      |

| Superior Cingulum Bundle             |        |       |        |                  |        |       |        |                  |        |       |        |                  |        |       |        |                  |
|--------------------------------------|--------|-------|--------|------------------|--------|-------|--------|------------------|--------|-------|--------|------------------|--------|-------|--------|------------------|
| TNF- $\alpha$ T3                     | -0.022 | 0.002 | 0.77   | 0.86             | -0.086 | 0.003 | 0.21   | 0.31             | -0.129 | 0.003 | 0.08   | 0.17             | -0.053 | 0.003 | 0.45   | 0.67             |
| SES group                            | -0.144 | 0.003 | 0.02   | 0.12             | 0.160  | 0.005 | 0.01   | <b>0.01</b>      | 0.060  | 0.006 | 0.33   | 0.33             | 0.183  | 0.006 | <0.01  | <b>0.01</b>      |
| Sex                                  | -0.093 | 0.003 | 0.12   | 0.35             | -0.014 | 0.005 | 0.79   | 0.96             | -0.097 | 0.005 | 0.09   | 0.21             | 0.028  | 0.005 | 0.61   | 0.90             |
| NICU stay                            | -0.050 | 0.008 | 0.48   | 0.67             | -0.009 | 0.012 | 0.89   | 0.96             | -0.051 | 0.014 | 0.45   | 0.58             | 0.012  | 0.014 | 0.85   | 0.97             |
| GA at delivery                       | 0.046  | 0.001 | 0.57   | 0.76             | 0.051  | 0.002 | 0.48   | 0.75             | 0.083  | 0.002 | 0.28   | 0.64             | 0.028  | 0.002 | 0.70   | 0.97             |
| GA at T3                             | -0.034 | 0.001 | 0.60   | 0.90             | -0.028 | 0.001 | 0.63   | 0.71             | -0.055 | 0.001 | 0.38   | 0.60             | -0.011 | 0.001 | 0.85   | 0.93             |
| PMA at scan                          | 0.310  | 0.001 | <0.001 | <b>&lt;0.001</b> | -0.509 | 0.002 | <0.001 | <b>&lt;0.001</b> | -0.398 | 0.002 | <0.001 | <b>&lt;0.001</b> | -0.485 | 0.002 | <0.001 | <b>&lt;0.001</b> |
| TNF- $\alpha$ T3:SES group           | -0.002 | 0.003 | 0.98   | 0.98             | 0.157  | 0.005 | 0.02   | 0.10             | 0.207  | 0.005 | <0.01  | <b>0.02</b>      | 0.110  | 0.006 | 0.11   | 0.30             |
| Corticospinal Tract                  |        |       |        |                  |        |       |        |                  |        |       |        |                  |        |       |        |                  |
| TNF- $\alpha$ T3                     | 0.030  | 0.002 | 0.64   | 0.86             | -0.065 | 0.003 | 0.25   | 0.33             | -0.061 | 0.002 | 0.33   | 0.41             | -0.068 | 0.003 | 0.25   | 0.45             |
| SES group                            | 0.041  | 0.003 | 0.46   | 0.65             | 0.133  | 0.005 | 0.01   | <b>0.01</b>      | 0.272  | 0.004 | <0.001 | <b>&lt;0.001</b> | 0.077  | 0.006 | 0.12   | 0.14             |
| Sex                                  | -0.013 | 0.003 | 0.80   | 0.90             | -0.033 | 0.004 | 0.46   | 0.83             | -0.061 | 0.004 | 0.22   | 0.29             | -0.018 | 0.005 | 0.70   | 0.90             |
| NICU stay                            | -0.071 | 0.008 | 0.24   | 0.64             | 0.003  | 0.011 | 0.96   | 0.96             | -0.080 | 0.010 | 0.18   | 0.33             | 0.020  | 0.014 | 0.71   | 0.97             |
| GA at delivery                       | -0.013 | 0.001 | 0.84   | 0.84             | -0.041 | 0.002 | 0.50   | 0.75             | -0.077 | 0.002 | 0.25   | 0.64             | 0.001  | 0.002 | 0.98   | 0.98             |
| GA at T3                             | 0.082  | 0.001 | 0.14   | 0.73             | -0.086 | 0.001 | 0.08   | 0.64             | -0.060 | 0.001 | 0.27   | 0.60             | -0.088 | 0.001 | 0.08   | 0.74             |
| PMA at scan                          | 0.548  | 0.001 | <0.001 | <b>&lt;0.001</b> | -0.667 | 0.002 | <0.001 | <b>&lt;0.001</b> | -0.554 | 0.001 | <0.001 | <b>&lt;0.001</b> | -0.661 | 0.002 | <0.001 | <b>&lt;0.001</b> |
| TNF- $\alpha$ T3:SES group           | -0.079 | 0.003 | 0.22   | 0.50             | 0.074  | 0.005 | 0.20   | 0.30             | 0.030  | 0.004 | 0.63   | 0.66             | 0.089  | 0.005 | 0.13   | 0.30             |
| Optic Radiation                      |        |       |        |                  |        |       |        |                  |        |       |        |                  |        |       |        |                  |
| TNF- $\alpha$ T3                     | 0.026  | 0.002 | 0.69   | 0.86             | -0.040 | 0.003 | 0.52   | 0.58             | -0.016 | 0.003 | 0.82   | 0.82             | -0.038 | 0.004 | 0.54   | 0.69             |
| SES group                            | 0.096  | 0.004 | 0.09   | 0.20             | 0.193  | 0.006 | <0.001 | <b>&lt;0.01</b>  | 0.346  | 0.006 | <0.001 | <b>&lt;0.001</b> | 0.120  | 0.007 | 0.02   | <b>0.04</b>      |
| Sex                                  | 0.007  | 0.003 | 0.90   | 0.90             | -0.107 | 0.005 | 0.03   | 0.19             | -0.161 | 0.005 | <0.01  | <b>0.04</b>      | -0.080 | 0.006 | 0.10   | 0.45             |
| NICU stay                            | -0.103 | 0.009 | 0.10   | 0.45             | 0.036  | 0.013 | 0.54   | 0.90             | -0.041 | 0.013 | 0.54   | 0.61             | 0.060  | 0.016 | 0.30   | 0.97             |
| GA at delivery                       | -0.039 | 0.001 | 0.58   | 0.76             | -0.100 | 0.002 | 0.13   | 0.75             | -0.158 | 0.002 | 0.04   | 0.33             | -0.063 | 0.003 | 0.33   | 0.74             |
| GA at T3                             | 0.013  | 0.001 | 0.82   | 0.93             | -0.038 | 0.001 | 0.48   | 0.64             | -0.032 | 0.001 | 0.60   | 0.60             | -0.036 | 0.001 | 0.49   | 0.76             |
| PMA at scan                          | 0.542  | 0.001 | <0.001 | <b>&lt;0.001</b> | -0.551 | 0.002 | <0.001 | <b>&lt;0.001</b> | -0.256 | 0.002 | <0.001 | <b>&lt;0.001</b> | -0.594 | 0.002 | <0.001 | <b>&lt;0.001</b> |
| TNF- $\alpha$ T3:SES group           | -0.046 | 0.003 | 0.48   | 0.59             | 0.064  | 0.005 | 0.30   | 0.39             | 0.045  | 0.005 | 0.53   | 0.66             | 0.061  | 0.006 | 0.32   | 0.41             |
| Uncinate Fasciculus                  |        |       |        |                  |        |       |        |                  |        |       |        |                  |        |       |        |                  |
| TNF- $\alpha$ T3                     | -0.067 | 0.002 | 0.31   | 0.56             | -0.035 | 0.003 | 0.61   | 0.61             | -0.096 | 0.003 | 0.19   | 0.29             | -0.004 | 0.003 | 0.95   | 0.95             |
| SES group                            | -0.041 | 0.003 | 0.47   | 0.65             | 0.176  | 0.005 | <0.01  | <b>0.01</b>      | 0.159  | 0.006 | 0.01   | <b>0.01</b>      | 0.154  | 0.005 | 0.01   | <b>0.01</b>      |
| Sex                                  | -0.075 | 0.003 | 0.16   | 0.35             | -0.041 | 0.004 | 0.45   | 0.83             | -0.100 | 0.005 | 0.09   | 0.21             | -0.009 | 0.005 | 0.86   | 0.97             |
| NICU stay                            | -0.027 | 0.007 | 0.67   | 0.67             | -0.152 | 0.011 | 0.02   | 0.90             | -0.187 | 0.014 | 0.01   | 0.07             | -0.109 | 0.012 | 0.08   | 0.70             |
| GA at delivery                       | 0.140  | 0.001 | 0.05   | 0.43             | 0.004  | 0.002 | 0.96   | 0.96             | 0.099  | 0.002 | 0.20   | 0.64             | -0.046 | 0.002 | 0.50   | 0.91             |
| GA at T3                             | -0.003 | 0.001 | 0.95   | 0.95             | -0.041 | 0.001 | 0.48   | 0.64             | -0.039 | 0.001 | 0.54   | 0.60             | -0.035 | 0.001 | 0.53   | 0.76             |
| PMA at scan                          | 0.458  | 0.001 | <0.001 | <b>&lt;0.001</b> | -0.516 | 0.002 | <0.001 | <b>&lt;0.001</b> | -0.253 | 0.002 | <0.001 | <b>&lt;0.001</b> | -0.564 | 0.002 | <0.001 | <b>&lt;0.001</b> |
| TNF- $\alpha$ T3:SES group           | -0.046 | 0.003 | 0.49   | 0.59             | -0.058 | 0.005 | 0.39   | 0.44             | -0.095 | 0.005 | 0.20   | 0.40             | -0.030 | 0.005 | 0.64   | 0.64             |
| Inferior Fronto-Occipital Fasciculus |        |       |        |                  |        |       |        |                  |        |       |        |                  |        |       |        |                  |
| TNF- $\alpha$ T3                     | 0.078  | 0.002 | 0.20   | 0.56             | -0.102 | 0.003 | 0.09   | 0.20             | -0.064 | 0.002 | 0.37   | 0.41             | -0.102 | 0.004 | 0.09   | 0.19             |
| SES group                            | 0.013  | 0.003 | 0.81   | 0.85             | 0.137  | 0.005 | 0.01   | <b>0.01</b>      | 0.261  | 0.004 | <0.001 | <b>&lt;0.001</b> | 0.094  | 0.007 | 0.06   | 0.08             |
| Sex                                  | -0.024 | 0.003 | 0.61   | 0.90             | -0.073 | 0.005 | 0.13   | 0.39             | -0.138 | 0.004 | 0.01   | 0.06             | -0.041 | 0.006 | 0.38   | 0.68             |
| NICU stay                            | -0.053 | 0.008 | 0.36   | 0.64             | -0.027 | 0.013 | 0.63   | 0.90             | -0.089 | 0.010 | 0.18   | 0.33             | -0.002 | 0.016 | 0.97   | 0.97             |
| GA at delivery                       | 0.074  | 0.001 | 0.25   | 0.75             | -0.058 | 0.002 | 0.36   | 0.75             | 0.003  | 0.002 | 0.97   | 0.97             | -0.066 | 0.003 | 0.30   | 0.74             |
| GA at T3                             | 0.037  | 0.001 | 0.48   | 0.87             | -0.048 | 0.001 | 0.36   | 0.64             | -0.040 | 0.001 | 0.51   | 0.60             | -0.048 | 0.001 | 0.35   | 0.76             |

|                                          |        |       |        |                  |        |       |        |                  |        |       |        |                  |        |       |        |                  |
|------------------------------------------|--------|-------|--------|------------------|--------|-------|--------|------------------|--------|-------|--------|------------------|--------|-------|--------|------------------|
| PMA at scan                              | 0.594  | 0.001 | <0.001 | <b>&lt;0.001</b> | -0.626 | 0.002 | <0.001 | <b>&lt;0.001</b> | -0.400 | 0.002 | <0.001 | <b>&lt;0.001</b> | -0.637 | 0.002 | <0.001 | <b>&lt;0.001</b> |
| TNF- $\alpha$ T3:SES group               | -0.081 | 0.003 | 0.18   | 0.50             | 0.094  | 0.005 | 0.12   | 0.26             | 0.077  | 0.004 | 0.28   | 0.41             | 0.095  | 0.006 | 0.11   | 0.30             |
| <b>Anterior Limb of Internal Capsule</b> |        |       |        |                  |        |       |        |                  |        |       |        |                  |        |       |        |                  |
| TNF- $\alpha$ T3                         | 0.081  | 0.002 | 0.17   | 0.56             | -0.135 | 0.004 | 0.03   | 0.11             | -0.136 | 0.003 | 0.06   | 0.17             | -0.129 | 0.004 | 0.03   | 0.19             |
| SES group                                | 0.010  | 0.003 | 0.85   | 0.85             | 0.127  | 0.007 | 0.02   | <b>0.02</b>      | 0.185  | 0.006 | <0.01  | <b>&lt;0.01</b>  | 0.099  | 0.007 | 0.06   | 0.08             |
| Sex                                      | -0.040 | 0.003 | 0.39   | 0.70             | -0.012 | 0.006 | 0.81   | 0.96             | -0.030 | 0.005 | 0.59   | 0.59             | -0.001 | 0.007 | 0.98   | 0.98             |
| NICU stay                                | -0.026 | 0.007 | 0.65   | 0.67             | -0.053 | 0.015 | 0.37   | 0.90             | -0.104 | 0.013 | 0.12   | 0.33             | -0.032 | 0.018 | 0.57   | 0.97             |
| GA at delivery                           | 0.105  | 0.001 | 0.10   | 0.43             | -0.049 | 0.002 | 0.46   | 0.75             | 0.023  | 0.002 | 0.75   | 0.97             | -0.066 | 0.003 | 0.31   | 0.74             |
| GA at T3                                 | 0.055  | 0.001 | 0.28   | 0.73             | -0.070 | 0.001 | 0.20   | 0.64             | -0.060 | 0.001 | 0.32   | 0.60             | -0.068 | 0.001 | 0.19   | 0.76             |
| PMA at scan                              | 0.593  | 0.001 | <0.001 | <b>&lt;0.001</b> | -0.590 | 0.002 | <0.001 | <b>&lt;0.001</b> | -0.447 | 0.002 | <0.001 | <b>&lt;0.001</b> | -0.611 | 0.003 | <0.001 | <b>&lt;0.001</b> |
| TNF- $\alpha$ T3:SES group               | -0.113 | 0.003 | 0.06   | 0.50             | 0.114  | 0.006 | 0.07   | 0.20             | 0.089  | 0.005 | 0.21   | 0.40             | 0.117  | 0.007 | 0.05   | 0.30             |
| <b>Inferior Cingulum Bundle</b>          |        |       |        |                  |        |       |        |                  |        |       |        |                  |        |       |        |                  |
| TNF- $\alpha$ T3                         | -0.174 | 0.001 | 0.02   | 0.17             | -0.101 | 0.002 | 0.11   | 0.20             | -0.226 | 0.002 | <0.01  | <b>0.02</b>      | -0.013 | 0.002 | 0.83   | 0.94             |
| SES group                                | -0.041 | 0.003 | 0.51   | 0.65             | 0.219  | 0.003 | <0.001 | <b>&lt;0.001</b> | 0.193  | 0.004 | <0.01  | <b>&lt;0.01</b>  | 0.170  | 0.003 | <0.01  | <b>0.01</b>      |
| Sex                                      | 0.020  | 0.002 | 0.73   | 0.90             | -0.102 | 0.003 | 0.04   | 0.19             | -0.070 | 0.004 | 0.22   | 0.29             | -0.099 | 0.003 | 0.05   | 0.45             |
| NICU stay                                | -0.125 | 0.006 | 0.07   | 0.45             | -0.032 | 0.007 | 0.59   | 0.90             | -0.118 | 0.009 | 0.08   | 0.33             | 0.041  | 0.008 | 0.49   | 0.97             |
| GA at delivery                           | -0.070 | 0.001 | 0.37   | 0.76             | 0.071  | 0.001 | 0.29   | 0.75             | 0.010  | 0.001 | 0.89   | 0.97             | 0.101  | 0.001 | 0.14   | 0.74             |
| GA at T3                                 | -0.062 | 0.000 | 0.33   | 0.73             | -0.049 | 0.001 | 0.36   | 0.64             | -0.097 | 0.001 | 0.12   | 0.60             | -0.005 | 0.001 | 0.93   | 0.93             |
| PMA at scan                              | 0.387  | 0.001 | <0.001 | <b>&lt;0.001</b> | -0.599 | 0.001 | <0.001 | <b>&lt;0.001</b> | -0.322 | 0.001 | <0.001 | <b>&lt;0.001</b> | -0.619 | 0.001 | <0.001 | <b>&lt;0.001</b> |
| TNF- $\alpha$ T3:SES group               | 0.116  | 0.002 | 0.11   | 0.50             | 0.168  | 0.003 | 0.01   | 0.07             | 0.260  | 0.004 | <0.001 | <b>&lt;0.01</b>  | 0.069  | 0.003 | 0.28   | 0.41             |
| <b>Fornix</b>                            |        |       |        |                  |        |       |        |                  |        |       |        |                  |        |       |        |                  |
| TNF- $\alpha$ T3                         | 0.010  | 0.001 | 0.89   | 0.89             | -0.143 | 0.002 | 0.02   | 0.11             | -0.161 | 0.003 | 0.02   | 0.10             | -0.115 | 0.002 | 0.06   | 0.19             |
| SES group                                | -0.139 | 0.002 | 0.03   | 0.12             | 0.124  | 0.003 | 0.02   | <b>0.02</b>      | 0.064  | 0.004 | 0.29   | 0.32             | 0.148  | 0.003 | 0.01   | <b>0.01</b>      |
| Sex                                      | -0.118 | 0.002 | 0.04   | 0.19             | 0.009  | 0.003 | 0.86   | 0.96             | -0.050 | 0.004 | 0.37   | 0.42             | 0.045  | 0.003 | 0.36   | 0.68             |
| NICU stay                                | -0.034 | 0.005 | 0.63   | 0.67             | -0.037 | 0.008 | 0.54   | 0.90             | -0.063 | 0.011 | 0.34   | 0.51             | -0.018 | 0.008 | 0.76   | 0.97             |
| GA at delivery                           | 0.042  | 0.001 | 0.59   | 0.76             | -0.011 | 0.001 | 0.87   | 0.96             | 0.011  | 0.002 | 0.88   | 0.97             | -0.021 | 0.001 | 0.75   | 0.97             |
| GA at T3                                 | -0.063 | 0.000 | 0.32   | 0.73             | 0.006  | 0.001 | 0.91   | 0.91             | -0.043 | 0.001 | 0.48   | 0.60             | 0.029  | 0.001 | 0.59   | 0.76             |
| PMA at scan                              | 0.338  | 0.001 | <0.001 | <b>&lt;0.001</b> | -0.610 | 0.001 | <0.001 | <b>&lt;0.001</b> | -0.461 | 0.002 | <0.001 | <b>&lt;0.001</b> | -0.621 | 0.001 | <0.001 | <b>&lt;0.001</b> |
| TNF- $\alpha$ T3:SES group               | -0.049 | 0.002 | 0.50   | 0.59             | 0.086  | 0.003 | 0.17   | 0.30             | 0.087  | 0.004 | 0.22   | 0.40             | 0.081  | 0.003 | 0.19   | 0.35             |

Bolded values represent statistical significance after FDR correction for multiple comparisons.  $\beta$ , standardized beta coefficient; SE, standard error;  $q$ , FDR-corrected p-value; FA, fractional anisotropy; MD, mean diffusivity; AD, axial diffusivity; RD, radial diffusivity; IL, interleukin; TNF- $\alpha$ , tumor necrosis factor alpha; GA, gestational age; PMA, infant postmenstrual age; Sex, child sex; T, trimester.

In addition to dichotomizing INR into SES groups, we also examined the association between continuous INR and neonatal dMRI parameters. As shown in Table S4, there was a positive relationship between INR and 1) CC AD; 2) CB MD and RD; 3) CST MD and AD; 4) OR MD, AD, and RD; 5) UF MD and AD; 6) IFOF MD and AD; 7) ALIC MD and AD; 8) CBIF MD, AD, and RD; and 9) FX RD. There was also a negative relationship between INR and FX FA.

**Table S6.** Multiple linear regression results of the association between continuous income-to-needs ratio and neonatal dMRI parameters.

|                                             | FA      |       |        |                  | MD      |       |        |                  | AD      |       |        |                  | RD      |       |        |                  |
|---------------------------------------------|---------|-------|--------|------------------|---------|-------|--------|------------------|---------|-------|--------|------------------|---------|-------|--------|------------------|
|                                             | $\beta$ | SE    | $p$    | $q$              | $\beta$ | SE    | $p$    | $q$              | $\beta$ | SE    | $p$    | $q$              | $\beta$ | SE    | $p$    | $q$              |
| <b>Corpus Callosum</b>                      |         |       |        |                  |         |       |        |                  |         |       |        |                  |         |       |        |                  |
| INR                                         | 0.064   | 0.001 | 0.21   | 0.60             | 0.026   | 0.001 | 0.59   | 0.59             | 0.132   | 0.001 | 0.02   | <b>0.03</b>      | -0.013  | 0.001 | 0.79   | 0.79             |
| NICU stay                                   | -0.102  | 0.007 | 0.09   | 0.32             | -0.002  | 0.007 | 0.98   | 0.98             | -0.003  | 0.007 | 0.97   | 0.97             | 0.029   | 0.010 | 0.62   | 0.78             |
| GA at delivery                              | 0.009   | 0.001 | 0.89   | 0.89             | 0.011   | 0.001 | 0.86   | 0.93             | 0.114   | 0.001 | 0.13   | 0.39             | -0.017  | 0.002 | 0.79   | 0.89             |
| Sex                                         | -0.102  | 0.003 | 0.04   | 0.18             | -0.005  | 0.003 | 0.92   | 0.92             | -0.085  | 0.003 | 0.13   | 0.15             | 0.049   | 0.004 | 0.29   | 0.66             |
| PMA at scan                                 | 0.460   | 0.001 | <0.001 | <b>&lt;0.001</b> | -0.588  | 0.001 | <0.001 | <b>&lt;0.001</b> | -0.237  | 0.001 | <0.001 | <b>&lt;0.001</b> | -0.568  | 0.002 | <0.001 | <b>&lt;0.001</b> |
| <b>Superior Cingulum Bundle</b>             |         |       |        |                  |         |       |        |                  |         |       |        |                  |         |       |        |                  |
| INR                                         | -0.100  | 0.000 | 0.06   | 0.29             | 0.128   | 0.001 | 0.01   | <b>0.02</b>      | 0.063   | 0.001 | 0.24   | 0.27             | 0.138   | 0.001 | 0.01   | <b>0.02</b>      |
| NICU stay                                   | -0.063  | 0.006 | 0.35   | 0.44             | 0.079   | 0.009 | 0.20   | 0.76             | 0.037   | 0.011 | 0.58   | 0.94             | 0.084   | 0.011 | 0.17   | 0.51             |
| GA at delivery                              | 0.032   | 0.001 | 0.66   | 0.89             | 0.064   | 0.002 | 0.33   | 0.80             | 0.089   | 0.002 | 0.21   | 0.39             | 0.041   | 0.002 | 0.54   | 0.89             |
| Sex                                         | -0.105  | 0.003 | 0.05   | 0.18             | -0.025  | 0.004 | 0.61   | 0.69             | -0.118  | 0.005 | 0.03   | 0.06             | 0.020   | 0.005 | 0.69   | 0.88             |
| PMA at scan                                 | 0.357   | 0.001 | <0.001 | <b>&lt;0.001</b> | -0.548  | 0.002 | <0.001 | <b>&lt;0.001</b> | -0.422  | 0.002 | <0.001 | <b>&lt;0.001</b> | -0.527  | 0.002 | <0.001 | <b>&lt;0.001</b> |
| <b>Corticospinal Tract</b>                  |         |       |        |                  |         |       |        |                  |         |       |        |                  |         |       |        |                  |
| INR                                         | 0.054   | 0.000 | 0.26   | 0.60             | 0.107   | 0.001 | 0.01   | <b>0.02</b>      | 0.228   | 0.001 | <0.001 | <b>&lt;0.001</b> | 0.060   | 0.001 | 0.16   | 0.18             |
| NICU stay                                   | -0.030  | 0.006 | 0.62   | 0.70             | 0.022   | 0.009 | 0.67   | 0.76             | 0.031   | 0.007 | 0.58   | 0.94             | 0.020   | 0.011 | 0.70   | 0.78             |
| GA at delivery                              | 0.023   | 0.001 | 0.72   | 0.89             | -0.005  | 0.001 | 0.93   | 0.93             | 0.031   | 0.001 | 0.60   | 0.67             | 0.008   | 0.002 | 0.89   | 0.89             |
| Sex                                         | 0.004   | 0.003 | 0.94   | 0.99             | -0.045  | 0.004 | 0.27   | 0.56             | -0.067  | 0.003 | 0.12   | 0.15             | -0.031  | 0.005 | 0.46   | 0.82             |
| PMA at scan                                 | 0.540   | 0.001 | <0.001 | <b>&lt;0.001</b> | -0.718  | 0.001 | <0.001 | <b>&lt;0.001</b> | -0.662  | 0.001 | <0.001 | <b>&lt;0.001</b> | -0.692  | 0.002 | <0.001 | <b>&lt;0.001</b> |
| <b>Optic Radiation</b>                      |         |       |        |                  |         |       |        |                  |         |       |        |                  |         |       |        |                  |
| INR                                         | 0.042   | 0.001 | 0.38   | 0.68             | 0.173   | 0.001 | <0.001 | <b>&lt;0.01</b>  | 0.269   | 0.001 | <0.001 | <b>&lt;0.001</b> | 0.121   | 0.001 | 0.01   | <b>0.02</b>      |
| NICU stay                                   | -0.157  | 0.007 | 0.01   | 0.07             | 0.096   | 0.010 | 0.08   | 0.72             | 0.003   | 0.010 | 0.96   | 0.97             | 0.122   | 0.012 | 0.02   | 0.21             |
| GA at delivery                              | -0.016  | 0.001 | 0.79   | 0.89             | -0.060  | 0.002 | 0.31   | 0.80             | -0.075  | 0.002 | 0.28   | 0.42             | -0.044  | 0.002 | 0.44   | 0.89             |
| Sex                                         | -0.013  | 0.003 | 0.78   | 0.99             | -0.122  | 0.005 | 0.01   | 0.05             | -0.199  | 0.005 | <0.001 | <b>&lt;0.01</b>  | -0.085  | 0.005 | 0.04   | 0.28             |
| PMA at scan                                 | 0.544   | 0.001 | <0.001 | <b>&lt;0.001</b> | -0.600  | 0.002 | <0.001 | <b>&lt;0.001</b> | -0.341  | 0.002 | <0.001 | <b>&lt;0.001</b> | -0.628  | 0.002 | <0.001 | <b>&lt;0.001</b> |
| <b>Uncinate Fasciculus</b>                  |         |       |        |                  |         |       |        |                  |         |       |        |                  |         |       |        |                  |
| INR                                         | 0.009   | 0.000 | 0.86   | 0.96             | 0.118   | 0.001 | 0.02   | <b>0.02</b>      | 0.135   | 0.001 | 0.02   | <b>0.02</b>      | 0.088   | 0.001 | 0.06   | 0.07             |
| NICU stay                                   | -0.060  | 0.005 | 0.31   | 0.44             | -0.031  | 0.009 | 0.61   | 0.76             | -0.084  | 0.011 | 0.22   | 0.94             | 0.000   | 0.009 | 0.99   | 0.99             |
| GA at delivery                              | 0.088   | 0.001 | 0.17   | 0.38             | 0.060   | 0.001 | 0.36   | 0.80             | 0.133   | 0.002 | 0.07   | 0.39             | 0.015   | 0.002 | 0.81   | 0.89             |
| Sex                                         | -0.082  | 0.002 | 0.08   | 0.18             | -0.049  | 0.004 | 0.31   | 0.56             | -0.117  | 0.005 | 0.03   | 0.06             | -0.012  | 0.004 | 0.78   | 0.88             |
| PMA at scan                                 | 0.509   | 0.001 | <0.001 | <b>&lt;0.001</b> | -0.589  | 0.001 | <0.001 | <b>&lt;0.001</b> | -0.302  | 0.002 | <0.001 | <b>&lt;0.001</b> | -0.636  | 0.002 | <0.001 | <b>&lt;0.001</b> |
| <b>Inferior Fronto-Occipital Fasciculus</b> |         |       |        |                  |         |       |        |                  |         |       |        |                  |         |       |        |                  |
| INR                                         | 0.001   | 0.000 | 0.99   | 0.99             | 0.118   | 0.001 | 0.01   | <b>0.02</b>      | 0.221   | 0.001 | <0.001 | <b>&lt;0.001</b> | 0.087   | 0.001 | 0.04   | 0.07             |
| NICU stay                                   | -0.070  | 0.006 | 0.19   | 0.42             | 0.052   | 0.010 | 0.32   | 0.76             | 0.031   | 0.008 | 0.63   | 0.94             | 0.060   | 0.012 | 0.25   | 0.51             |
| GA at delivery                              | 0.088   | 0.001 | 0.12   | 0.37             | -0.028  | 0.002 | 0.63   | 0.93             | 0.087   | 0.001 | 0.20   | 0.39             | -0.052  | 0.002 | 0.35   | 0.89             |



|                                          |        |       |        |                  |        |       |        |                  |        |       |        |                  |        |       |        |                  |
|------------------------------------------|--------|-------|--------|------------------|--------|-------|--------|------------------|--------|-------|--------|------------------|--------|-------|--------|------------------|
| Sex                                      | 0.001  | 0.003 | 0.99   | 0.99             | -0.099 | 0.004 | 0.02   | 0.05             | -0.164 | 0.003 | <0.01  | <b>0.01</b>      | -0.068 | 0.005 | 0.10   | 0.29             |
| PMA at scan                              | 0.618  | 0.001 | <0.001 | <b>&lt;0.001</b> | -0.673 | 0.002 | <0.001 | <b>&lt;0.001</b> | -0.483 | 0.001 | <0.001 | <b>&lt;0.001</b> | -0.675 | 0.002 | <0.001 | <b>&lt;0.001</b> |
| <b>Anterior Limb of Internal Capsule</b> |        |       |        |                  |        |       |        |                  |        |       |        |                  |        |       |        |                  |
| INR                                      | -0.021 | 0.000 | 0.63   | 0.95             | 0.105  | 0.001 | 0.02   | <b>0.03</b>      | 0.129  | 0.001 | 0.01   | <b>0.02</b>      | 0.090  | 0.001 | 0.04   | 0.07             |
| NICU stay                                | -0.052 | 0.005 | 0.33   | 0.44             | 0.054  | 0.012 | 0.34   | 0.76             | 0.037  | 0.010 | 0.57   | 0.94             | 0.059  | 0.014 | 0.28   | 0.51             |
| GA at delivery                           | 0.128  | 0.001 | 0.03   | 0.24             | -0.013 | 0.002 | 0.83   | 0.93             | 0.093  | 0.002 | 0.18   | 0.39             | -0.043 | 0.002 | 0.47   | 0.89             |
| Sex                                      | -0.032 | 0.002 | 0.46   | 0.82             | -0.032 | 0.005 | 0.48   | 0.66             | -0.053 | 0.005 | 0.31   | 0.31             | -0.019 | 0.006 | 0.66   | 0.88             |
| PMA at scan                              | 0.602  | 0.001 | <0.001 | <b>&lt;0.001</b> | -0.609 | 0.002 | <0.001 | <b>&lt;0.001</b> | -0.467 | 0.002 | <0.001 | <b>&lt;0.001</b> | -0.629 | 0.002 | <0.001 | <b>&lt;0.001</b> |
| <b>Inferior Cingulum Bundle</b>          |        |       |        |                  |        |       |        |                  |        |       |        |                  |        |       |        |                  |
| INR                                      | -0.013 | 0.000 | 0.81   | 0.96             | 0.193  | 0.000 | <0.001 | <b>&lt;0.001</b> | 0.193  | 0.001 | <0.001 | <b>&lt;0.01</b>  | 0.154  | 0.000 | <0.01  | <b>&lt;0.01</b>  |
| NICU stay                                | -0.106 | 0.005 | 0.11   | 0.32             | 0.037  | 0.005 | 0.51   | 0.76             | -0.033 | 0.007 | 0.63   | 0.94             | 0.081  | 0.006 | 0.15   | 0.51             |
| GA at delivery                           | -0.119 | 0.001 | 0.09   | 0.37             | 0.081  | 0.001 | 0.18   | 0.80             | -0.010 | 0.001 | 0.89   | 0.89             | 0.121  | 0.001 | 0.05   | 0.42             |
| Sex                                      | -0.025 | 0.002 | 0.63   | 0.94             | -0.108 | 0.002 | 0.02   | 0.05             | -0.118 | 0.003 | 0.03   | 0.06             | -0.083 | 0.003 | 0.06   | 0.28             |
| PMA at scan                              | 0.440  | 0.001 | <0.001 | <b>&lt;0.001</b> | -0.645 | 0.001 | <0.001 | <b>&lt;0.001</b> | -0.345 | 0.001 | <0.001 | <b>&lt;0.001</b> | -0.667 | 0.001 | <0.001 | <b>&lt;0.001</b> |
| <b>Fornix</b>                            |        |       |        |                  |        |       |        |                  |        |       |        |                  |        |       |        |                  |
| INR                                      | -0.153 | 0.000 | <0.01  | <b>0.04</b>      | 0.074  | 0.000 | 0.11   | 0.12             | 0.015  | 0.001 | 0.77   | 0.77             | 0.107  | 0.000 | 0.02   | <b>0.04</b>      |
| NICU stay                                | -0.013 | 0.004 | 0.84   | 0.84             | 0.030  | 0.006 | 0.60   | 0.76             | 0.017  | 0.008 | 0.79   | 0.97             | 0.033  | 0.006 | 0.55   | 0.78             |
| GA at delivery                           | 0.034  | 0.001 | 0.63   | 0.89             | 0.031  | 0.001 | 0.61   | 0.93             | 0.053  | 0.001 | 0.44   | 0.57             | 0.016  | 0.001 | 0.79   | 0.89             |
| Sex                                      | -0.094 | 0.002 | 0.07   | 0.18             | -0.029 | 0.003 | 0.51   | 0.66             | -0.079 | 0.004 | 0.12   | 0.15             | 0.006  | 0.003 | 0.90   | 0.90             |
| PMA at scan                              | 0.378  | 0.001 | <0.001 | <b>&lt;0.001</b> | -0.649 | 0.001 | <0.001 | <b>&lt;0.001</b> | -0.499 | 0.001 | <0.001 | <b>&lt;0.001</b> | -0.659 | 0.001 | <0.001 | <b>&lt;0.001</b> |

Bolded values represent statistical significance after FDR correction for multiple comparisons.  $\beta$ , standardized beta coefficient; SE, standard error;  $q$ , FDR-corrected p-value; FA, fractional anisotropy; MD, mean diffusivity; AD, axial diffusivity; RD, radial diffusivity; GA, gestational age; PMA, infant postmenstrual age; INR, income-to-needs ratio.

We also investigated the moderating role of continuous INR in the relationship between average maternal cytokine concentrations and neonatal dMRI parameters. As show in Table S5, continuous INR did not moderate this association.

**Table S7.** Multiple linear regression results of the moderating role of continuous income-to-needs ratio in the relationship between average maternal cytokine concentration and neonatal dMRI parameters.

|                                 | IL-6    |       |          |                  |         |       |          |                  |         |       |          |                  |         |       |          |                  |
|---------------------------------|---------|-------|----------|------------------|---------|-------|----------|------------------|---------|-------|----------|------------------|---------|-------|----------|------------------|
|                                 | FA      |       |          |                  | MD      |       |          |                  | AD      |       |          |                  | RD      |       |          |                  |
|                                 | $\beta$ | SE    | <i>p</i> | <i>q</i>         | $\beta$ | SE    | <i>p</i> | <i>q</i>         | $\beta$ | SE    | <i>p</i> | <i>q</i>         | $\beta$ | SE    | <i>p</i> | <i>q</i>         |
| <b>Corpus Callosum</b>          |         |       |          |                  |         |       |          |                  |         |       |          |                  |         |       |          |                  |
| IL-6                            | -0.019  | 0.003 | 0.79     | 0.79             | -0.064  | 0.002 | 0.33     | 0.42             | -0.126  | 0.003 | 0.12     | 0.15             | -0.027  | 0.003 | 0.68     | 0.75             |
| INR                             | 0.041   | 0.001 | 0.45     | 0.85             | 0.033   | 0.001 | 0.52     | 0.52             | 0.112   | 0.001 | 0.07     | 0.11             | 0.001   | 0.001 | 0.99     | 0.99             |
| NICU stay                       | -0.097  | 0.007 | 0.11     | 0.34             | -0.009  | 0.007 | 0.88     | 0.88             | -0.004  | 0.007 | 0.95     | 0.98             | 0.023   | 0.010 | 0.70     | 0.78             |
| GA at delivery                  | 0.011   | 0.001 | 0.86     | 0.95             | -0.006  | 0.001 | 0.93     | 0.93             | 0.092   | 0.001 | 0.23     | 0.55             | -0.028  | 0.002 | 0.66     | 0.95             |
| PMA at scan                     | 0.456   | 0.001 | <0.001   | <b>&lt;0.001</b> | -0.585  | 0.001 | <0.001   | <b>&lt;0.001</b> | -0.235  | 0.001 | <0.001   | <b>&lt;0.001</b> | -0.564  | 0.002 | <0.001   | <b>&lt;0.001</b> |
| Sex                             | -0.101  | 0.003 | 0.04     | 0.21             | 0.001   | 0.003 | 0.98     | 0.98             | -0.077  | 0.003 | 0.18     | 0.20             | 0.053   | 0.004 | 0.26     | 0.57             |
| IL-6:INR                        | -0.066  | 0.001 | 0.37     | 0.75             | 0.098   | 0.001 | 0.16     | 0.72             | 0.057   | 0.001 | 0.49     | 0.74             | 0.086   | 0.001 | 0.22     | 0.81             |
| <b>Superior Cingulum Bundle</b> |         |       |          |                  |         |       |          |                  |         |       |          |                  |         |       |          |                  |
| IL-6                            | 0.083   | 0.002 | 0.27     | 0.41             | -0.121  | 0.003 | 0.08     | 0.30             | -0.065  | 0.004 | 0.38     | 0.38             | -0.129  | 0.004 | 0.06     | 0.28             |
| INR                             | -0.090  | 0.001 | 0.12     | 0.56             | 0.135   | 0.001 | 0.01     | <b>0.02</b>      | 0.078   | 0.001 | 0.18     | 0.20             | 0.139   | 0.001 | 0.01     | <b>0.04</b>      |
| NICU stay                       | -0.060  | 0.006 | 0.37     | 0.48             | 0.073   | 0.009 | 0.24     | 0.76             | 0.032   | 0.011 | 0.63     | 0.98             | 0.078   | 0.011 | 0.21     | 0.53             |
| GA at delivery                  | 0.043   | 0.001 | 0.56     | 0.92             | 0.043   | 0.002 | 0.52     | 0.93             | 0.073   | 0.002 | 0.31     | 0.55             | 0.020   | 0.002 | 0.76     | 0.95             |
| PMA at scan                     | 0.356   | 0.001 | <0.001   | <b>&lt;0.001</b> | -0.543  | 0.002 | <0.001   | <b>&lt;0.001</b> | -0.419  | 0.002 | <0.001   | <b>&lt;0.001</b> | -0.522  | 0.002 | <0.001   | <b>&lt;0.001</b> |
| Sex                             | -0.106  | 0.003 | 0.05     | 0.21             | -0.020  | 0.004 | 0.68     | 0.77             | -0.113  | 0.005 | 0.03     | 0.06             | 0.023   | 0.005 | 0.63     | 0.93             |
| IL-6:INR                        | -0.048  | 0.001 | 0.54     | 0.75             | 0.116   | 0.001 | 0.11     | 0.72             | 0.088   | 0.001 | 0.26     | 0.65             | 0.111   | 0.001 | 0.12     | 0.81             |
| <b>Corticospinal Tract</b>      |         |       |          |                  |         |       |          |                  |         |       |          |                  |         |       |          |                  |
| IL-6                            | -0.223  | 0.002 | <0.01    | <b>0.01</b>      | 0.071   | 0.003 | 0.21     | 0.31             | -0.090  | 0.003 | 0.14     | 0.16             | 0.111   | 0.004 | 0.06     | 0.28             |
| INR                             | 0.020   | 0.001 | 0.69     | 0.85             | 0.111   | 0.001 | 0.01     | <b>0.02</b>      | 0.200   | 0.001 | <0.001   | <b>&lt;0.001</b> | 0.075   | 0.001 | 0.10     | 0.14             |
| NICU stay                       | -0.030  | 0.006 | 0.61     | 0.69             | 0.021   | 0.009 | 0.68     | 0.76             | 0.030   | 0.007 | 0.58     | 0.98             | 0.020   | 0.011 | 0.70     | 0.78             |
| GA at delivery                  | 0.004   | 0.001 | 0.95     | 0.95             | -0.005  | 0.001 | 0.92     | 0.93             | 0.014   | 0.001 | 0.81     | 0.81             | 0.010   | 0.002 | 0.85     | 0.95             |
| PMA at scan                     | 0.541   | 0.001 | <0.001   | <b>&lt;0.001</b> | -0.720  | 0.001 | <0.001   | <b>&lt;0.001</b> | -0.668  | 0.001 | <0.001   | <b>&lt;0.001</b> | -0.694  | 0.002 | <0.001   | <b>&lt;0.001</b> |
| Sex                             | -0.001  | 0.003 | 0.98     | 0.98             | -0.037  | 0.004 | 0.36     | 0.65             | -0.058  | 0.003 | 0.18     | 0.20             | -0.024  | 0.005 | 0.56     | 0.93             |
| IL-6:INR                        | 0.029   | 0.001 | 0.67     | 0.75             | -0.002  | 0.001 | 0.98     | 0.98             | 0.013   | 0.001 | 0.84     | 0.84             | 0.000   | 0.001 | 1.00     | 1.00             |
| <b>Optic Radiation</b>          |         |       |          |                  |         |       |          |                  |         |       |          |                  |         |       |          |                  |
| IL-6                            | -0.162  | 0.002 | 0.01     | 0.06             | 0.008   | 0.004 | 0.90     | 0.90             | -0.122  | 0.004 | 0.09     | 0.14             | 0.056   | 0.004 | 0.35     | 0.60             |
| INR                             | 0.046   | 0.001 | 0.37     | 0.85             | 0.149   | 0.001 | <0.01    | <b>0.01</b>      | 0.241   | 0.001 | 0.00     | 0.00             | 0.102   | 0.001 | 0.03     | 0.09             |
| NICU stay                       | -0.161  | 0.007 | 0.01     | 0.05             | 0.099   | 0.010 | 0.07     | 0.66             | 0.001   | 0.010 | 0.98     | 0.98             | 0.125   | 0.012 | 0.02     | 0.18             |
| GA at delivery                  | -0.032  | 0.001 | 0.61     | 0.92             | -0.064  | 0.002 | 0.28     | 0.93             | -0.094  | 0.002 | 0.18     | 0.55             | -0.042  | 0.002 | 0.46     | 0.95             |
| PMA at scan                     | 0.548   | 0.001 | <0.001   | <b>&lt;0.001</b> | -0.603  | 0.002 | <0.001   | <b>&lt;0.001</b> | -0.343  | 0.002 | 0.00     | 0.00             | -0.631  | 0.002 | 0.00     | 0.00             |
| Sex                             | -0.019  | 0.003 | 0.68     | 0.88             | -0.114  | 0.005 | 0.01     | 0.07             | -0.193  | 0.005 | 0.00     | 0.00             | -0.077  | 0.005 | 0.07     | 0.35             |
| IL-6:INR                        | 0.089   | 0.001 | 0.19     | 0.75             | -0.037  | 0.001 | 0.56     | 0.89             | 0.029   | 0.001 | 0.70     | 0.84             | -0.058  | 0.001 | 0.36     | 0.81             |
| <b>Uncinate Fasciculus</b>      |         |       |          |                  |         |       |          |                  |         |       |          |                  |         |       |          |                  |
| IL-6                            | -0.117  | 0.002 | 0.07     | 0.16             | -0.135  | 0.003 | 0.04     | 0.30             | -0.232  | 0.004 | <0.01    | <b>0.02</b>      | -0.074  | 0.003 | 0.25     | 0.58             |

|                |        |       |        |                  |        |       |        |                  |        |       |        |                  |        |       |        |                  |
|----------------|--------|-------|--------|------------------|--------|-------|--------|------------------|--------|-------|--------|------------------|--------|-------|--------|------------------|
| INR            | -0.010 | 0.000 | 0.85   | 0.85             | 0.086  | 0.001 | 0.10   | 0.13             | 0.087  | 0.001 | 0.14   | 0.18             | 0.067  | 0.001 | 0.18   | 0.20             |
| NICU stay      | -0.057 | 0.005 | 0.33   | 0.48             | -0.032 | 0.009 | 0.59   | 0.76             | -0.084 | 0.011 | 0.21   | 0.98             | -0.001 | 0.009 | 0.98   | 0.98             |
| GA at delivery | 0.079  | 0.001 | 0.22   | 0.48             | 0.043  | 0.001 | 0.51   | 0.93             | 0.108  | 0.002 | 0.14   | 0.55             | 0.004  | 0.002 | 0.95   | 0.95             |
| PMA at scan    | 0.509  | 0.001 | <0.001 | <b>&lt;0.001</b> | -0.589 | 0.001 | <0.001 | <b>&lt;0.001</b> | -0.301 | 0.002 | <0.001 | <b>&lt;0.001</b> | -0.636 | 0.002 | <0.001 | <b>&lt;0.001</b> |
| Sex            | -0.084 | 0.002 | 0.07   | 0.21             | -0.045 | 0.004 | 0.34   | 0.65             | -0.115 | 0.005 | 0.03   | 0.06             | -0.009 | 0.004 | 0.84   | 0.94             |
| IL-6:INR       | -0.017 | 0.001 | 0.80   | 0.80             | 0.028  | 0.001 | 0.69   | 0.89             | 0.019  | 0.001 | 0.81   | 0.84             | 0.026  | 0.001 | 0.69   | 0.95             |

**Inferior Fronto-Occipital Fasciculus**

|                |        |       |        |                  |        |       |        |                  |        |       |        |                  |        |       |        |                  |
|----------------|--------|-------|--------|------------------|--------|-------|--------|------------------|--------|-------|--------|------------------|--------|-------|--------|------------------|
| IL-6           | -0.032 | 0.002 | 0.59   | 0.76             | -0.081 | 0.004 | 0.17   | 0.30             | -0.180 | 0.003 | 0.01   | 0.05             | -0.048 | 0.004 | 0.40   | 0.60             |
| INR            | -0.009 | 0.001 | 0.85   | 0.85             | 0.119  | 0.001 | 0.01   | <b>0.02</b>      | 0.220  | 0.001 | <0.001 | <b>&lt;0.001</b> | 0.092  | 0.001 | 0.04   | 0.09             |
| NICU stay      | -0.068 | 0.006 | 0.20   | 0.46             | 0.048  | 0.010 | 0.36   | 0.76             | 0.025  | 0.008 | 0.69   | 0.98             | 0.056  | 0.012 | 0.28   | 0.53             |
| GA at delivery | 0.090  | 0.001 | 0.12   | 0.35             | -0.044 | 0.002 | 0.44   | 0.93             | 0.061  | 0.001 | 0.36   | 0.55             | -0.064 | 0.002 | 0.25   | 0.95             |
| PMA at scan    | 0.616  | 0.001 | <0.001 | <b>&lt;0.001</b> | -0.670 | 0.002 | <0.001 | <b>&lt;0.001</b> | -0.478 | 0.001 | <0.001 | <b>&lt;0.001</b> | -0.672 | 0.002 | <0.001 | <b>&lt;0.001</b> |
| Sex            | -0.004 | 0.003 | 0.92   | 0.98             | -0.094 | 0.004 | 0.02   | 0.07             | -0.161 | 0.003 | <0.01  | <b>&lt;0.01</b>  | -0.063 | 0.005 | 0.12   | 0.36             |
| IL-6:INR       | -0.031 | 0.001 | 0.62   | 0.75             | 0.071  | 0.001 | 0.25   | 0.75             | 0.106  | 0.001 | 0.15   | 0.65             | 0.062  | 0.001 | 0.31   | 0.81             |

**Anterior Limb of Internal Capsule**

|                |        |       |        |                  |        |       |        |                  |        |       |        |                  |        |       |        |                  |
|----------------|--------|-------|--------|------------------|--------|-------|--------|------------------|--------|-------|--------|------------------|--------|-------|--------|------------------|
| IL-6           | -0.017 | 0.002 | 0.77   | 0.79             | -0.093 | 0.004 | 0.14   | 0.30             | -0.156 | 0.004 | 0.03   | 0.07             | -0.070 | 0.005 | 0.26   | 0.58             |
| INR            | -0.009 | 0.000 | 0.85   | 0.85             | 0.093  | 0.001 | 0.06   | 0.09             | 0.122  | 0.001 | 0.03   | 0.06             | 0.078  | 0.001 | 0.11   | 0.14             |
| NICU stay      | -0.054 | 0.005 | 0.32   | 0.48             | 0.052  | 0.012 | 0.36   | 0.76             | 0.033  | 0.010 | 0.61   | 0.98             | 0.058  | 0.014 | 0.29   | 0.53             |
| GA at delivery | 0.125  | 0.001 | 0.03   | 0.26             | -0.028 | 0.002 | 0.66   | 0.93             | 0.070  | 0.002 | 0.32   | 0.55             | -0.053 | 0.002 | 0.37   | 0.95             |
| PMA at scan    | 0.604  | 0.001 | <0.001 | <b>&lt;0.001</b> | -0.607 | 0.002 | <0.001 | <b>&lt;0.001</b> | -0.464 | 0.002 | <0.001 | <b>&lt;0.001</b> | -0.627 | 0.002 | <0.001 | <b>&lt;0.001</b> |
| Sex            | -0.032 | 0.002 | 0.45   | 0.81             | -0.028 | 0.005 | 0.54   | 0.70             | -0.047 | 0.005 | 0.36   | 0.36             | -0.016 | 0.006 | 0.72   | 0.93             |
| IL-6:INR       | 0.030  | 0.001 | 0.64   | 0.75             | 0.037  | 0.001 | 0.58   | 0.89             | 0.081  | 0.001 | 0.29   | 0.65             | 0.021  | 0.001 | 0.75   | 0.95             |

**Inferior Cingulum Bundle**

|                |        |       |        |                  |        |       |        |                  |        |       |        |                  |        |       |        |                  |
|----------------|--------|-------|--------|------------------|--------|-------|--------|------------------|--------|-------|--------|------------------|--------|-------|--------|------------------|
| IL-6           | -0.144 | 0.002 | 0.05   | 0.15             | -0.038 | 0.002 | 0.55   | 0.61             | -0.143 | 0.003 | 0.06   | 0.10             | 0.020  | 0.002 | 0.75   | 0.75             |
| INR            | -0.024 | 0.000 | 0.68   | 0.85             | 0.189  | 0.000 | <0.001 | <b>&lt;0.01</b>  | 0.182  | 0.001 | <0.01  | <b>&lt;0.01</b>  | 0.152  | 0.001 | <0.01  | <b>0.02</b>      |
| NICU stay      | -0.109 | 0.005 | 0.10   | 0.34             | 0.036  | 0.005 | 0.52   | 0.76             | -0.036 | 0.007 | 0.59   | 0.98             | 0.082  | 0.006 | 0.15   | 0.53             |
| GA at delivery | -0.136 | 0.001 | 0.06   | 0.26             | 0.073  | 0.001 | 0.24   | 0.93             | -0.032 | 0.001 | 0.66   | 0.79             | 0.120  | 0.001 | 0.05   | 0.45             |
| PMA at scan    | 0.443  | 0.001 | <0.001 | <b>&lt;0.001</b> | -0.644 | 0.001 | <0.001 | <b>&lt;0.001</b> | -0.342 | 0.001 | <0.001 | <b>&lt;0.001</b> | -0.666 | 0.001 | <0.001 | <b>&lt;0.001</b> |
| Sex            | -0.026 | 0.002 | 0.62   | 0.88             | -0.104 | 0.002 | 0.02   | 0.07             | -0.113 | 0.003 | 0.03   | 0.06             | -0.079 | 0.003 | 0.08   | 0.35             |
| IL-6:INR       | 0.055  | 0.000 | 0.47   | 0.75             | 0.018  | 0.001 | 0.79   | 0.89             | 0.065  | 0.001 | 0.41   | 0.73             | -0.013 | 0.001 | 0.85   | 0.95             |

**Fornix**

|                |        |       |        |                  |        |       |        |                  |        |       |        |                  |        |       |        |                  |
|----------------|--------|-------|--------|------------------|--------|-------|--------|------------------|--------|-------|--------|------------------|--------|-------|--------|------------------|
| IL-6           | -0.116 | 0.001 | 0.12   | 0.21             | -0.094 | 0.002 | 0.13   | 0.30             | -0.170 | 0.003 | 0.02   | 0.05             | -0.039 | 0.002 | 0.53   | 0.68             |
| INR            | -0.145 | 0.000 | 0.01   | 0.11             | 0.064  | 0.001 | 0.20   | 0.22             | 0.019  | 0.001 | 0.73   | 0.73             | 0.091  | 0.001 | 0.06   | 0.11             |
| NICU stay      | -0.021 | 0.004 | 0.75   | 0.75             | 0.029  | 0.006 | 0.61   | 0.76             | 0.011  | 0.008 | 0.86   | 0.98             | 0.036  | 0.006 | 0.52   | 0.78             |
| GA at delivery | 0.011  | 0.001 | 0.88   | 0.95             | 0.020  | 0.001 | 0.75   | 0.93             | 0.026  | 0.001 | 0.70   | 0.79             | 0.015  | 0.001 | 0.80   | 0.95             |
| PMA at scan    | 0.391  | 0.001 | <0.001 | <b>&lt;0.001</b> | -0.647 | 0.001 | <0.001 | <b>&lt;0.001</b> | -0.495 | 0.001 | <0.001 | <b>&lt;0.001</b> | -0.660 | 0.001 | <0.001 | <b>&lt;0.001</b> |
| Sex            | -0.088 | 0.002 | 0.10   | 0.21             | -0.028 | 0.003 | 0.53   | 0.70             | -0.074 | 0.004 | 0.14   | 0.20             | 0.003  | 0.003 | 0.94   | 0.94             |
| IL-6:INR       | 0.123  | 0.000 | 0.12   | 0.75             | 0.019  | 0.001 | 0.77   | 0.89             | 0.115  | 0.001 | 0.12   | 0.65             | -0.032 | 0.001 | 0.62   | 0.95             |

**IL-8**

|                        | FA      |       |      |      | MD      |       |      |      | AD      |       |      |      | RD      |       |      |      |
|------------------------|---------|-------|------|------|---------|-------|------|------|---------|-------|------|------|---------|-------|------|------|
|                        | $\beta$ | SE    | $p$  | $q$  | $\beta$ | SE    | $p$  | $q$  | $\beta$ | SE    | $p$  | $q$  | $\beta$ | SE    | $p$  | $q$  |
| <b>Corpus Callosum</b> |         |       |      |      |         |       |      |      |         |       |      |      |         |       |      |      |
| IL-8                   | 0.012   | 0.003 | 0.87 | 0.88 | 0.062   | 0.003 | 0.36 | 0.65 | 0.131   | 0.003 | 0.11 | 0.47 | 0.041   | 0.004 | 0.54 | 0.79 |

|                                             |        |       |        |                  |        |       |        |                  |        |       |        |                  |        |       |        |                  |
|---------------------------------------------|--------|-------|--------|------------------|--------|-------|--------|------------------|--------|-------|--------|------------------|--------|-------|--------|------------------|
| INR                                         | 0.061  | 0.001 | 0.23   | 0.68             | 0.018  | 0.001 | 0.70   | 0.70             | 0.116  | 0.001 | 0.04   | 0.06             | -0.017 | 0.001 | 0.72   | 0.72             |
| NICU stay                                   | -0.102 | 0.007 | 0.09   | 0.35             | -0.004 | 0.007 | 0.94   | 0.94             | -0.008 | 0.007 | 0.91   | 1.00             | 0.028  | 0.010 | 0.64   | 0.80             |
| GA at delivery                              | 0.005  | 0.001 | 0.94   | 0.94             | 0.000  | 0.001 | 1.00   | 1.00             | 0.091  | 0.001 | 0.23   | 0.37             | -0.022 | 0.002 | 0.73   | 0.94             |
| PMA at scan                                 | 0.462  | 0.001 | <0.001 | <b>&lt;0.001</b> | -0.581 | 0.001 | <0.001 | <b>&lt;0.001</b> | -0.220 | 0.001 | <0.001 | <b>&lt;0.001</b> | -0.564 | 0.002 | <0.001 | <b>&lt;0.001</b> |
| Sex                                         | -0.101 | 0.003 | 0.04   | 0.19             | -0.001 | 0.003 | 0.98   | 0.98             | -0.076 | 0.003 | 0.18   | 0.20             | 0.052  | 0.004 | 0.27   | 0.61             |
| IL-8:INR                                    | -0.030 | 0.001 | 0.67   | 0.85             | -0.098 | 0.001 | 0.15   | 0.58             | -0.203 | 0.001 | 0.01   | 0.12             | -0.052 | 0.001 | 0.44   | 0.77             |
| <b>Superior Cingulum Bundle</b>             |        |       |        |                  |        |       |        |                  |        |       |        |                  |        |       |        |                  |
| IL-8                                        | -0.044 | 0.002 | 0.56   | 0.88             | 0.098  | 0.004 | 0.16   | 0.65             | 0.076  | 0.004 | 0.31   | 0.52             | 0.098  | 0.004 | 0.17   | 0.79             |
| INR                                         | -0.096 | 0.000 | 0.08   | 0.36             | 0.120  | 0.001 | 0.02   | <b>0.03</b>      | 0.058  | 0.001 | 0.29   | 0.32             | 0.130  | 0.001 | 0.01   | <b>0.03</b>      |
| NICU stay                                   | -0.062 | 0.006 | 0.36   | 0.46             | 0.076  | 0.009 | 0.21   | 0.78             | 0.035  | 0.011 | 0.60   | 0.98             | 0.081  | 0.011 | 0.19   | 0.54             |
| GA at delivery                              | 0.037  | 0.001 | 0.61   | 0.94             | 0.059  | 0.002 | 0.38   | 0.85             | 0.086  | 0.002 | 0.23   | 0.37             | 0.035  | 0.002 | 0.60   | 0.94             |
| PMA at scan                                 | 0.353  | 0.001 | <0.001 | <b>&lt;0.001</b> | -0.539 | 0.002 | <0.001 | <b>&lt;0.001</b> | -0.416 | 0.002 | <0.001 | <b>&lt;0.001</b> | -0.518 | 0.002 | <0.001 | <b>&lt;0.001</b> |
| Sex                                         | -0.108 | 0.003 | 0.04   | 0.19             | -0.019 | 0.004 | 0.69   | 0.78             | -0.114 | 0.005 | 0.03   | 0.07             | 0.025  | 0.005 | 0.61   | 0.89             |
| IL-8:INR                                    | 0.059  | 0.001 | 0.44   | 0.85             | -0.089 | 0.001 | 0.21   | 0.58             | -0.058 | 0.001 | 0.45   | 0.50             | -0.093 | 0.001 | 0.19   | 0.77             |
| <b>Corticospinal Tract</b>                  |        |       |        |                  |        |       |        |                  |        |       |        |                  |        |       |        |                  |
| IL-8                                        | 0.025  | 0.002 | 0.71   | 0.88             | 0.056  | 0.003 | 0.33   | 0.65             | 0.102  | 0.003 | 0.10   | 0.47             | 0.033  | 0.004 | 0.58   | 0.79             |
| INR                                         | 0.049  | 0.000 | 0.32   | 0.72             | 0.103  | 0.001 | 0.01   | <b>0.03</b>      | 0.217  | 0.001 | <0.001 | <b>&lt;0.001</b> | 0.060  | 0.001 | 0.17   | 0.19             |
| NICU stay                                   | -0.031 | 0.006 | 0.61   | 0.68             | 0.020  | 0.009 | 0.70   | 0.78             | 0.027  | 0.007 | 0.61   | 0.98             | 0.020  | 0.011 | 0.71   | 0.80             |
| GA at delivery                              | 0.011  | 0.001 | 0.86   | 0.94             | -0.006 | 0.001 | 0.92   | 1.00             | 0.018  | 0.001 | 0.76   | 0.86             | 0.012  | 0.002 | 0.83   | 0.94             |
| PMA at scan                                 | 0.545  | 0.001 | <0.001 | <b>&lt;0.001</b> | -0.714 | 0.001 | <0.001 | <b>&lt;0.001</b> | -0.652 | 0.001 | <0.001 | <b>&lt;0.001</b> | -0.691 | 0.002 | <0.001 | <b>&lt;0.001</b> |
| Sex                                         | 0.005  | 0.003 | 0.91   | 0.98             | -0.042 | 0.004 | 0.30   | 0.61             | -0.061 | 0.003 | 0.16   | 0.20             | -0.030 | 0.005 | 0.48   | 0.87             |
| IL-8:INR                                    | -0.084 | 0.001 | 0.22   | 0.85             | -0.035 | 0.001 | 0.55   | 0.70             | -0.139 | 0.001 | 0.03   | 0.12             | 0.008  | 0.001 | 0.90   | 0.90             |
| <b>Optic Radiation</b>                      |        |       |        |                  |        |       |        |                  |        |       |        |                  |        |       |        |                  |
| IL-8                                        | 0.025  | 0.003 | 0.71   | 0.88             | 0.077  | 0.004 | 0.22   | 0.65             | 0.104  | 0.004 | 0.16   | 0.47             | 0.048  | 0.005 | 0.43   | 0.79             |
| INR                                         | 0.039  | 0.001 | 0.42   | 0.76             | 0.167  | 0.001 | <0.001 | <b>&lt;0.01</b>  | 0.259  | 0.001 | <0.001 | <b>&lt;0.001</b> | 0.118  | 0.001 | 0.01   | <b>0.03</b>      |
| NICU stay                                   | -0.158 | 0.007 | 0.01   | 0.07             | 0.094  | 0.010 | 0.09   | 0.78             | 0.000  | 0.010 | 1.00   | 1.00             | 0.121  | 0.012 | 0.02   | 0.22             |
| GA at delivery                              | -0.021 | 0.001 | 0.74   | 0.94             | -0.063 | 0.002 | 0.29   | 0.85             | -0.084 | 0.002 | 0.23   | 0.37             | -0.045 | 0.002 | 0.44   | 0.94             |
| PMA at scan                                 | 0.547  | 0.001 | <0.001 | <b>&lt;0.001</b> | -0.593 | 0.002 | <0.001 | <b>&lt;0.001</b> | -0.332 | 0.002 | <0.001 | <b>&lt;0.001</b> | -0.624 | 0.002 | <0.001 | <b>&lt;0.001</b> |
| Sex                                         | -0.011 | 0.003 | 0.81   | 0.98             | -0.118 | 0.005 | 0.01   | 0.06             | -0.193 | 0.005 | <0.001 | <b>&lt;0.01</b>  | -0.083 | 0.005 | 0.05   | 0.31             |
| IL-8:INR                                    | -0.040 | 0.001 | 0.55   | 0.85             | -0.062 | 0.001 | 0.32   | 0.58             | -0.115 | 0.001 | 0.12   | 0.36             | -0.032 | 0.001 | 0.60   | 0.77             |
| <b>Uncinate Fasciculus</b>                  |        |       |        |                  |        |       |        |                  |        |       |        |                  |        |       |        |                  |
| IL-8                                        | 0.027  | 0.002 | 0.69   | 0.88             | 0.041  | 0.003 | 0.55   | 0.77             | 0.061  | 0.004 | 0.44   | 0.56             | 0.024  | 0.004 | 0.72   | 0.79             |
| INR                                         | 0.010  | 0.000 | 0.83   | 0.99             | 0.110  | 0.001 | 0.03   | <b>0.04</b>      | 0.127  | 0.001 | 0.02   | <b>0.04</b>      | 0.081  | 0.001 | 0.08   | 0.10             |
| NICU stay                                   | -0.060 | 0.005 | 0.31   | 0.46             | -0.033 | 0.009 | 0.59   | 0.78             | -0.086 | 0.011 | 0.21   | 0.98             | -0.001 | 0.009 | 0.99   | 0.99             |
| GA at delivery                              | 0.097  | 0.001 | 0.13   | 0.31             | 0.043  | 0.001 | 0.51   | 0.85             | 0.121  | 0.002 | 0.10   | 0.37             | -0.002 | 0.002 | 0.98   | 0.98             |
| PMA at scan                                 | 0.508  | 0.001 | <0.001 | <b>&lt;0.001</b> | -0.582 | 0.001 | <0.001 | <b>&lt;0.001</b> | -0.295 | 0.002 | <0.001 | <b>&lt;0.001</b> | -0.630 | 0.002 | <0.001 | <b>&lt;0.001</b> |
| Sex                                         | -0.081 | 0.002 | 0.08   | 0.19             | -0.046 | 0.004 | 0.34   | 0.61             | -0.114 | 0.005 | 0.04   | 0.07             | -0.010 | 0.004 | 0.82   | 0.89             |
| IL-8:INR                                    | 0.044  | 0.001 | 0.52   | 0.85             | -0.125 | 0.001 | 0.07   | 0.58             | -0.107 | 0.001 | 0.17   | 0.38             | -0.114 | 0.001 | 0.08   | 0.72             |
| <b>Inferior Fronto-Occipital Fasciculus</b> |        |       |        |                  |        |       |        |                  |        |       |        |                  |        |       |        |                  |
| IL-8                                        | 0.011  | 0.002 | 0.86   | 0.88             | 0.032  | 0.004 | 0.60   | 0.77             | 0.080  | 0.003 | 0.26   | 0.52             | 0.016  | 0.005 | 0.79   | 0.79             |
| INR                                         | 0.001  | 0.000 | 0.99   | 0.99             | 0.114  | 0.001 | 0.01   | <b>0.03</b>      | 0.213  | 0.001 | <0.001 | <b>&lt;0.001</b> | 0.085  | 0.001 | 0.04   | 0.08             |
| NICU stay                                   | -0.071 | 0.006 | 0.19   | 0.42             | 0.051  | 0.010 | 0.33   | 0.78             | 0.028  | 0.008 | 0.66   | 0.98             | 0.059  | 0.012 | 0.25   | 0.54             |
| GA at delivery                              | 0.091  | 0.001 | 0.12   | 0.31             | -0.033 | 0.002 | 0.56   | 0.85             | 0.079  | 0.001 | 0.24   | 0.37             | -0.056 | 0.002 | 0.32   | 0.94             |

|             |       |       |        |                  |        |       |        |                  |        |       |        |                  |        |       |        |                  |
|-------------|-------|-------|--------|------------------|--------|-------|--------|------------------|--------|-------|--------|------------------|--------|-------|--------|------------------|
| PMA at scan | 0.619 | 0.001 | <0.001 | <b>&lt;0.001</b> | -0.669 | 0.002 | <0.001 | <b>&lt;0.001</b> | -0.475 | 0.001 | <0.001 | <b>&lt;0.001</b> | -0.673 | 0.002 | <0.001 | <b>&lt;0.001</b> |
| Sex         | 0.001 | 0.003 | 0.98   | 0.98             | -0.097 | 0.004 | 0.02   | 0.06             | -0.159 | 0.003 | <0.01  | <b>0.01</b>      | -0.067 | 0.005 | 0.10   | 0.31             |
| IL-8:INR    | 0.012 | 0.001 | 0.85   | 0.85             | -0.051 | 0.001 | 0.40   | 0.60             | -0.089 | 0.001 | 0.22   | 0.38             | -0.037 | 0.001 | 0.53   | 0.77             |

**Anterior Limb of Internal Capsule**

|                |        |       |        |                  |        |       |        |                  |        |       |        |                  |        |       |        |                  |
|----------------|--------|-------|--------|------------------|--------|-------|--------|------------------|--------|-------|--------|------------------|--------|-------|--------|------------------|
| IL-8           | -0.032 | 0.002 | 0.60   | 0.88             | 0.061  | 0.005 | 0.35   | 0.65             | 0.036  | 0.004 | 0.62   | 0.70             | 0.058  | 0.005 | 0.36   | 0.79             |
| INR            | -0.019 | 0.000 | 0.67   | 0.99             | 0.099  | 0.001 | 0.03   | <b>0.04</b>      | 0.124  | 0.001 | 0.02   | <b>0.04</b>      | 0.085  | 0.001 | 0.06   | 0.09             |
| NICU stay      | -0.052 | 0.005 | 0.34   | 0.46             | 0.052  | 0.012 | 0.36   | 0.78             | 0.036  | 0.010 | 0.59   | 0.98             | 0.057  | 0.014 | 0.30   | 0.54             |
| GA at delivery | 0.127  | 0.001 | 0.03   | 0.26             | -0.019 | 0.002 | 0.75   | 0.97             | 0.082  | 0.002 | 0.25   | 0.37             | -0.047 | 0.002 | 0.43   | 0.94             |
| PMA at scan    | 0.600  | 0.001 | <0.001 | <b>&lt;0.001</b> | -0.603 | 0.002 | <0.001 | <b>&lt;0.001</b> | -0.462 | 0.002 | <0.001 | <b>&lt;0.001</b> | -0.624 | 0.002 | <0.001 | <b>&lt;0.001</b> |
| Sex            | -0.033 | 0.002 | 0.44   | 0.79             | -0.028 | 0.005 | 0.53   | 0.69             | -0.051 | 0.005 | 0.33   | 0.33             | -0.016 | 0.006 | 0.72   | 0.89             |
| IL-8:INR       | 0.015  | 0.001 | 0.80   | 0.85             | -0.071 | 0.001 | 0.28   | 0.58             | -0.086 | 0.001 | 0.25   | 0.38             | -0.058 | 0.001 | 0.35   | 0.77             |

**Inferior Cingulum Bundle**

|                |        |       |        |                  |        |       |        |                  |        |       |        |                  |        |       |        |                  |
|----------------|--------|-------|--------|------------------|--------|-------|--------|------------------|--------|-------|--------|------------------|--------|-------|--------|------------------|
| IL-8           | -0.107 | 0.002 | 0.15   | 0.88             | 0.000  | 0.002 | 0.99   | 0.99             | -0.072 | 0.003 | 0.35   | 0.52             | 0.036  | 0.002 | 0.58   | 0.79             |
| INR            | -0.001 | 0.000 | 0.98   | 0.99             | 0.192  | 0.000 | <0.001 | <b>&lt;0.001</b> | 0.199  | 0.001 | <0.001 | <b>&lt;0.01</b>  | 0.150  | 0.000 | <0.01  | <b>0.01</b>      |
| NICU stay      | -0.103 | 0.005 | 0.12   | 0.35             | 0.037  | 0.005 | 0.51   | 0.78             | -0.030 | 0.007 | 0.65   | 0.98             | 0.079  | 0.006 | 0.16   | 0.54             |
| GA at delivery | -0.106 | 0.001 | 0.14   | 0.31             | 0.079  | 0.001 | 0.20   | 0.85             | -0.004 | 0.001 | 0.95   | 0.95             | 0.114  | 0.001 | 0.06   | 0.55             |
| PMA at scan    | 0.429  | 0.001 | <0.001 | <b>&lt;0.001</b> | -0.644 | 0.001 | <0.001 | <b>&lt;0.001</b> | -0.352 | 0.001 | <0.001 | <b>&lt;0.001</b> | -0.663 | 0.001 | <0.001 | <b>&lt;0.001</b> |
| Sex            | -0.032 | 0.002 | 0.54   | 0.82             | -0.108 | 0.002 | 0.02   | 0.06             | -0.122 | 0.003 | 0.02   | 0.07             | -0.081 | 0.003 | 0.07   | 0.31             |
| IL-8:INR       | 0.142  | 0.000 | 0.06   | 0.53             | -0.015 | 0.001 | 0.81   | 0.81             | 0.077  | 0.001 | 0.32   | 0.41             | -0.059 | 0.001 | 0.36   | 0.77             |

**Fornix**

|                |        |       |        |                  |        |       |        |                  |        |       |        |                  |        |       |        |                  |
|----------------|--------|-------|--------|------------------|--------|-------|--------|------------------|--------|-------|--------|------------------|--------|-------|--------|------------------|
| IL-8           | -0.011 | 0.001 | 0.88   | 0.88             | 0.016  | 0.002 | 0.81   | 0.91             | 0.001  | 0.003 | 0.98   | 0.98             | 0.021  | 0.002 | 0.74   | 0.79             |
| INR            | -0.153 | 0.000 | <0.001 | <b>0.04</b>      | 0.075  | 0.000 | 0.11   | 0.12             | 0.015  | 0.001 | 0.77   | 0.77             | 0.107  | 0.000 | 0.02   | <b>0.04</b>      |
| NICU stay      | -0.013 | 0.004 | 0.85   | 0.85             | 0.029  | 0.006 | 0.60   | 0.78             | 0.017  | 0.008 | 0.79   | 1.00             | 0.033  | 0.006 | 0.56   | 0.80             |
| GA at delivery | 0.030  | 0.001 | 0.67   | 0.94             | 0.036  | 0.001 | 0.56   | 0.85             | 0.055  | 0.001 | 0.42   | 0.55             | 0.022  | 0.001 | 0.72   | 0.94             |
| PMA at scan    | 0.378  | 0.001 | <0.001 | <b>&lt;0.001</b> | -0.649 | 0.001 | <0.001 | <b>&lt;0.001</b> | -0.500 | 0.001 | <0.001 | <b>&lt;0.001</b> | -0.659 | 0.001 | <0.001 | <b>&lt;0.001</b> |
| Sex            | -0.094 | 0.002 | 0.07   | 0.19             | -0.029 | 0.003 | 0.52   | 0.69             | -0.079 | 0.004 | 0.12   | 0.18             | 0.006  | 0.003 | 0.89   | 0.89             |
| IL-8:INR       | -0.016 | 0.000 | 0.83   | 0.85             | 0.021  | 0.001 | 0.74   | 0.81             | 0.014  | 0.001 | 0.85   | 0.85             | 0.023  | 0.001 | 0.71   | 0.80             |

**IL-10**

|  | FA      |    |          |          | MD      |    |          |          | AD      |    |          |          | RD      |    |          |          |
|--|---------|----|----------|----------|---------|----|----------|----------|---------|----|----------|----------|---------|----|----------|----------|
|  | $\beta$ | SE | <i>p</i> | <i>q</i> | $\beta$ | SE | <i>p</i> | <i>q</i> | $\beta$ | SE | <i>p</i> | <i>q</i> | $\beta$ | SE | <i>p</i> | <i>q</i> |

**Corpus Callosum**

|                |        |        |        |                  |        |         |        |                  |        |       |        |                  |        |       |        |                  |
|----------------|--------|--------|--------|------------------|--------|---------|--------|------------------|--------|-------|--------|------------------|--------|-------|--------|------------------|
| IL-10          | -0.057 | -0.833 | 0.41   | 0.46             | 0.094  | 1.428   | 0.15   | 0.28             | -0.030 | 0.003 | 0.71   | 0.71             | 0.095  | 0.004 | 0.15   | 0.26             |
| INR            | 0.065  | 1.298  | 0.20   | 0.59             | 0.026  | 0.532   | 0.59   | 0.59             | 0.135  | 0.001 | 0.02   | <b>0.03</b>      | -0.014 | 0.001 | 0.77   | 0.77             |
| NICU stay      | -0.088 | -1.447 | 0.15   | 0.45             | -0.014 | -0.239  | 0.81   | 0.83             | 0.003  | 0.007 | 0.97   | 0.97             | 0.015  | 0.010 | 0.80   | 0.90             |
| GA at delivery | 0.015  | 0.234  | 0.82   | 0.83             | 0.009  | 0.145   | 0.88   | 1.00             | 0.119  | 0.001 | 0.12   | 0.36             | -0.021 | 0.002 | 0.74   | 0.83             |
| PMA at scan    | 0.467  | 8.729  | <0.001 | <b>&lt;0.001</b> | -0.590 | -11.412 | <0.001 | <b>&lt;0.001</b> | -0.233 | 0.001 | <0.001 | <b>&lt;0.001</b> | -0.572 | 0.002 | <0.001 | <b>&lt;0.001</b> |
| Sex            | -0.106 | -2.159 | 0.03   | 0.22             | 0.004  | 0.081   | 0.94   | 0.94             | -0.080 | 0.003 | 0.16   | 0.18             | 0.057  | 0.004 | 0.22   | 0.50             |
| IL-10:INR      | -0.021 | -0.305 | 0.76   | 0.95             | -0.002 | -0.028  | 0.98   | 0.98             | 0.036  | 0.001 | 0.66   | 0.97             | -0.004 | 0.001 | 0.95   | 0.95             |

**Superior Cingulum Bundle**

|                |        |        |      |      |       |       |      |             |       |       |      |      |       |       |      |             |
|----------------|--------|--------|------|------|-------|-------|------|-------------|-------|-------|------|------|-------|-------|------|-------------|
| IL-10          | -0.100 | -1.340 | 0.18 | 0.23 | 0.106 | 1.545 | 0.12 | 0.28        | 0.066 | 0.004 | 0.38 | 0.56 | 0.117 | 0.004 | 0.09 | 0.21        |
| INR            | -0.097 | -1.789 | 0.07 | 0.34 | 0.129 | 2.586 | 0.01 | <b>0.02</b> | 0.066 | 0.001 | 0.22 | 0.25 | 0.138 | 0.001 | 0.01 | <b>0.02</b> |
| NICU stay      | -0.061 | -0.900 | 0.37 | 0.50 | 0.077 | 1.245 | 0.21 | 0.80        | 0.034 | 0.011 | 0.61 | 0.92 | 0.082 | 0.011 | 0.19 | 0.54        |
| GA at delivery | 0.033  | 0.453  | 0.65 | 0.83 | 0.067 | 1.016 | 0.31 | 0.83        | 0.092 | 0.002 | 0.20 | 0.36 | 0.043 | 0.002 | 0.52 | 0.83        |

|                                             |        |        |        |                  |        |         |        |                  |        |       |             |                  |        |       |        |                  |
|---------------------------------------------|--------|--------|--------|------------------|--------|---------|--------|------------------|--------|-------|-------------|------------------|--------|-------|--------|------------------|
| PMA at scan                                 | 0.356  | 6.071  | <0.001 | <b>&lt;0.001</b> | -0.543 | -10.068 | <0.001 | <b>&lt;0.001</b> | -0.417 | 0.002 | <0.001      | <b>&lt;0.001</b> | -0.523 | 0.002 | <0.001 | <b>&lt;0.001</b> |
| Sex                                         | -0.105 | -1.973 | 0.05   | 0.22             | -0.027 | -0.555  | 0.58   | 0.65             | -0.120 | 0.005 | 0.02        | 0.05             | 0.017  | 0.005 | 0.72   | 0.81             |
| IL-10:INR                                   | 0.100  | 1.340  | 0.18   | 0.95             | -0.058 | -0.839  | 0.40   | 0.88             | 0.005  | 0.001 | 0.95        | 0.97             | -0.083 | 0.001 | 0.23   | 0.95             |
| <b>Corticospinal Tract</b>                  |        |        |        |                  |        |         |        |                  |        |       |             |                  |        |       |        |                  |
| IL-10                                       | -0.221 | -3.410 | <0.01  | <b>0.01</b>      | 0.176  | 3.122   | 0.00   | <b>0.02</b>      | 0.058  | 0.003 | 0.35        | 0.56             | 0.190  | 0.004 | <0.01  | <b>0.01</b>      |
| INR                                         | 0.047  | 0.990  | 0.32   | 0.68             | 0.111  | 2.725   | 0.01   | <b>0.02</b>      | 0.226  | 0.001 | <0.001      | <b>&lt;0.001</b> | 0.066  | 0.001 | 0.12   | 0.13             |
| NICU stay                                   | -0.018 | -0.314 | 0.75   | 0.83             | 0.011  | 0.217   | 0.83   | 0.83             | 0.029  | 0.007 | 0.60        | 0.92             | 0.009  | 0.011 | 0.86   | 0.90             |
| GA at delivery                              | 0.013  | 0.210  | 0.83   | 0.83             | 0.000  | -0.002  | 1.00   | 1.00             | 0.031  | 0.001 | 0.60        | 0.67             | 0.012  | 0.002 | 0.83   | 0.83             |
| PMA at scan                                 | 0.532  | 10.470 | <0.001 | <b>&lt;0.001</b> | -0.711 | -16.184 | <0.001 | <b>&lt;0.001</b> | -0.660 | 0.001 | <0.001      | <b>&lt;0.001</b> | -0.684 | 0.002 | <0.001 | <b>&lt;0.001</b> |
| Sex                                         | 0.001  | 0.016  | 0.99   | 0.99             | -0.039 | -0.981  | 0.33   | 0.59             | -0.061 | 0.003 | 0.16        | 0.18             | -0.027 | 0.005 | 0.52   | 0.81             |
| IL-10:INR                                   | 0.008  | 0.128  | 0.90   | 0.95             | -0.036 | -0.631  | 0.53   | 0.88             | -0.046 | 0.001 | 0.46        | 0.97             | -0.020 | 0.001 | 0.74   | 0.95             |
| <b>Optic Radiation</b>                      |        |        |        |                  |        |         |        |                  |        |       |             |                  |        |       |        |                  |
| IL-10                                       | -0.113 | -1.738 | 0.08   | 0.15             | 0.169  | 2.772   | 0.01   | <b>0.03</b>      | 0.135  | 0.004 | 0.06        | 0.38             | 0.165  | 0.005 | 0.01   | <b>0.03</b>      |
| INR                                         | 0.042  | 0.882  | 0.38   | 0.68             | 0.170  | 3.844   | <0.001 | <b>&lt;0.01</b>  | 0.266  | 0.001 | <b>0.00</b> | <b>&lt;0.001</b> | 0.119  | 0.001 | 0.01   | <b>0.02</b>      |
| NICU stay                                   | -0.147 | -2.511 | 0.01   | 0.11             | 0.089  | 1.628   | 0.10   | 0.80             | 0.002  | 0.010 | 0.97        | 0.97             | 0.113  | 0.012 | 0.03   | 0.31             |
| GA at delivery                              | -0.016 | -0.258 | 0.80   | 0.83             | -0.059 | -1.009  | 0.31   | 0.83             | -0.074 | 0.002 | 0.29        | 0.43             | -0.044 | 0.002 | 0.44   | 0.83             |
| PMA at scan                                 | 0.543  | 10.674 | <0.001 | <b>&lt;0.001</b> | -0.598 | -12.537 | <0.001 | <b>&lt;0.001</b> | -0.339 | 0.002 | <0.001      | <b>&lt;0.001</b> | -0.625 | 0.002 | <0.001 | <b>&lt;0.001</b> |
| Sex                                         | -0.019 | -0.404 | 0.69   | 0.88             | -0.115 | -2.669  | 0.01   | 0.06             | -0.196 | 0.005 | <0.001      | <b>&lt;0.01</b>  | -0.079 | 0.005 | 0.06   | 0.28             |
| IL-10:INR                                   | 0.026  | 0.396  | 0.69   | 0.95             | -0.116 | -1.909  | 0.06   | 0.52             | -0.139 | 0.001 | 0.05        | 0.49             | -0.096 | 0.001 | 0.11   | 0.95             |
| <b>Uncinate Fasciculus</b>                  |        |        |        |                  |        |         |        |                  |        |       |             |                  |        |       |        |                  |
| IL-10                                       | -0.037 | -0.557 | 0.58   | 0.58             | -0.067 | -0.994  | 0.32   | 0.48             | -0.107 | 0.004 | 0.16        | 0.38             | -0.038 | 0.004 | 0.55   | 0.71             |
| INR                                         | 0.004  | 0.081  | 0.94   | 0.97             | 0.117  | 2.378   | 0.02   | <b>0.03</b>      | 0.129  | 0.001 | 0.02        | <b>0.03</b>      | 0.088  | 0.001 | 0.06   | 0.08             |
| NICU stay                                   | -0.060 | -0.999 | 0.32   | 0.50             | -0.022 | -0.364  | 0.72   | 0.83             | -0.073 | 0.011 | 0.28        | 0.92             | 0.007  | 0.009 | 0.90   | 0.90             |
| GA at delivery                              | 0.083  | 1.295  | 0.20   | 0.44             | 0.059  | 0.904   | 0.37   | 0.83             | 0.128  | 0.002 | 0.08        | 0.36             | 0.015  | 0.002 | 0.81   | 0.83             |
| PMA at scan                                 | 0.504  | 9.669  | <0.001 | <b>&lt;0.001</b> | -0.589 | -11.141 | <0.001 | <b>&lt;0.001</b> | -0.302 | 0.002 | <0.001      | <b>&lt;0.001</b> | -0.635 | 0.002 | <0.001 | <b>&lt;0.001</b> |
| Sex                                         | -0.076 | -1.600 | 0.11   | 0.25             | -0.058 | -1.217  | 0.22   | 0.51             | -0.123 | 0.005 | 0.02        | 0.05             | -0.022 | 0.004 | 0.63   | 0.81             |
| IL-10:INR                                   | -0.030 | -0.452 | 0.65   | 0.95             | -0.037 | -0.548  | 0.58   | 0.88             | -0.057 | 0.001 | 0.46        | 0.97             | -0.028 | 0.001 | 0.67   | 0.95             |
| <b>Inferior Fronto-Occipital Fasciculus</b> |        |        |        |                  |        |         |        |                  |        |       |             |                  |        |       |        |                  |
| IL-10                                       | -0.104 | -1.770 | 0.08   | 0.15             | 0.048  | 0.815   | 0.42   | 0.53             | -0.033 | 0.003 | 0.64        | 0.71             | 0.063  | 0.005 | 0.27   | 0.41             |
| INR                                         | -0.002 | -0.044 | 0.97   | 0.97             | 0.120  | 2.792   | 0.01   | <b>0.02</b>      | 0.224  | 0.001 | <0.001      | <b>&lt;0.001</b> | 0.090  | 0.001 | 0.03   | 0.06             |
| NICU stay                                   | -0.059 | -1.126 | 0.26   | 0.50             | 0.049  | 0.926   | 0.36   | 0.80             | 0.038  | 0.008 | 0.55        | 0.92             | 0.054  | 0.012 | 0.30   | 0.54             |
| GA at delivery                              | 0.086  | 1.522  | 0.13   | 0.39             | -0.025 | -0.446  | 0.66   | 0.98             | 0.090  | 0.001 | 0.19        | 0.36             | -0.049 | 0.002 | 0.38   | 0.83             |
| PMA at scan                                 | 0.619  | 13.427 | <0.001 | <b>&lt;0.001</b> | -0.670 | -14.503 | <0.001 | <b>&lt;0.001</b> | -0.478 | 0.001 | <0.001      | <b>&lt;0.001</b> | -0.673 | 0.002 | <0.001 | <b>&lt;0.001</b> |
| Sex                                         | -0.004 | -0.096 | 0.92   | 0.99             | -0.099 | -2.367  | 0.02   | 0.06             | -0.170 | 0.003 | <0.01       | <b>&lt;0.01</b>  | -0.067 | 0.005 | 0.10   | 0.30             |
| IL-10:INR                                   | -0.008 | -0.133 | 0.89   | 0.95             | 0.002  | 0.037   | 0.97   | 0.98             | 0.004  | 0.001 | 0.95        | 0.97             | 0.012  | 0.001 | 0.83   | 0.95             |
| <b>Anterior Limb of Internal Capsule</b>    |        |        |        |                  |        |         |        |                  |        |       |             |                  |        |       |        |                  |
| IL-10                                       | -0.085 | -1.426 | 0.16   | 0.23             | -0.016 | -0.254  | 0.80   | 0.80             | -0.101 | 0.004 | 0.17        | 0.38             | 0.009  | 0.005 | 0.89   | 0.92             |
| INR                                         | -0.023 | -0.528 | 0.60   | 0.90             | 0.108  | 2.313   | 0.02   | <b>0.03</b>      | 0.132  | 0.001 | 0.01        | <b>0.03</b>      | 0.093  | 0.001 | 0.04   | 0.06             |
| NICU stay                                   | -0.046 | -0.865 | 0.39   | 0.50             | 0.054  | 0.943   | 0.35   | 0.80             | 0.043  | 0.010 | 0.51        | 0.92             | 0.058  | 0.014 | 0.30   | 0.54             |
| GA at delivery                              | 0.125  | 2.178  | 0.03   | 0.27             | -0.011 | -0.182  | 0.86   | 1.00             | 0.095  | 0.002 | 0.18        | 0.36             | -0.040 | 0.002 | 0.50   | 0.83             |
| PMA at scan                                 | 0.600  | 12.865 | <0.001 | <b>&lt;0.001</b> | -0.607 | -12.069 | <0.001 | <b>&lt;0.001</b> | -0.465 | 0.002 | <0.001      | <b>&lt;0.001</b> | -0.627 | 0.002 | <0.001 | <b>&lt;0.001</b> |
| Sex                                         | -0.034 | -0.813 | 0.42   | 0.75             | -0.034 | -0.733  | 0.46   | 0.65             | -0.057 | 0.005 | 0.27        | 0.27             | -0.020 | 0.006 | 0.65   | 0.81             |
| IL-10:INR                                   | 0.004  | 0.062  | 0.95   | 0.95             | 0.035  | 0.544   | 0.59   | 0.88             | 0.063  | 0.001 | 0.39        | 0.97             | 0.026  | 0.001 | 0.67   | 0.95             |
| <b>Inferior Cingulum Bundle</b>             |        |        |        |                  |        |         |        |                  |        |       |             |                  |        |       |        |                  |

|                                 |                           |           |          |                  |                           |           |          |                  |                           |           |          |                  |                           |           |          |                  |
|---------------------------------|---------------------------|-----------|----------|------------------|---------------------------|-----------|----------|------------------|---------------------------|-----------|----------|------------------|---------------------------|-----------|----------|------------------|
| IL-10                           | -0.145                    | -1.974    | 0.05     | 0.15             | 0.146                     | 2.319     | 0.02     | 0.06             | 0.055                     | 0.003     | 0.46     | 0.60             | 0.163                     | 0.002     | 0.01     | <b>0.03</b>      |
| INR                             | -0.019                    | -0.352    | 0.73     | 0.93             | 0.194                     | 4.230     | <0.001   | <b>&lt;0.001</b> | 0.189                     | 0.001     | <0.01    | <b>&lt;0.01</b>  | 0.157                     | 0.000     | <0.01    | <b>0.01</b>      |
| NICU stay                       | -0.103                    | -1.570    | 0.12     | 0.45             | 0.030                     | 0.524     | 0.60     | 0.83             | -0.039                    | 0.007     | 0.57     | 0.92             | 0.074                     | 0.006     | 0.18     | 0.54             |
| GA at delivery                  | -0.129                    | -1.820    | 0.07     | 0.31             | 0.084                     | 1.380     | 0.17     | 0.83             | -0.014                    | 0.001     | 0.84     | 0.84             | 0.126                     | 0.001     | 0.04     | 0.33             |
| PMA at scan                     | 0.432                     | 7.534     | <0.001   | <b>&lt;0.001</b> | -0.639                    | -12.926   | <0.001   | <b>&lt;0.001</b> | -0.346                    | 0.001     | <0.001   | <b>&lt;0.001</b> | -0.660                    | 0.001     | <0.001   | <b>&lt;0.001</b> |
| Sex                             | -0.023                    | -0.438    | 0.66     | 0.88             | -0.108                    | -2.412    | 0.02     | 0.06             | -0.116                    | 0.003     | 0.03     | 0.06             | -0.085                    | 0.003     | 0.06     | 0.28             |
| IL-10:INR                       | 0.016                     | 0.214     | 0.83     | 0.95             | -0.051                    | -0.809    | 0.42     | 0.88             | -0.046                    | 0.001     | 0.54     | 0.97             | -0.044                    | 0.001     | 0.48     | 0.95             |
| <b>Fornix</b>                   |                           |           |          |                  |                           |           |          |                  |                           |           |          |                  |                           |           |          |                  |
| IL-10                           | 0.134                     | 1.812     | 0.07     | 0.15             | 0.040                     | 0.626     | 0.53     | 0.60             | 0.099                     | 0.003     | 0.16     | 0.38             | -0.006                    | 0.002     | 0.92     | 0.92             |
| INR                             | -0.153                    | -2.845    | <0.01    | <b>0.04</b>      | 0.075                     | 1.625     | 0.11     | 0.12             | 0.018                     | 0.001     | 0.73     | 0.73             | 0.106                     | 0.000     | 0.02     | <b>0.04</b>      |
| NICU stay                       | -0.015                    | -0.220    | 0.83     | 0.83             | 0.025                     | 0.447     | 0.66     | 0.83             | 0.012                     | 0.008     | 0.85     | 0.97             | 0.030                     | 0.006     | 0.59     | 0.89             |
| GA at delivery                  | 0.039                     | 0.548     | 0.58     | 0.83             | 0.031                     | 0.511     | 0.61     | 0.98             | 0.057                     | 0.001     | 0.40     | 0.52             | 0.014                     | 0.001     | 0.81     | 0.83             |
| PMA at scan                     | 0.381                     | 6.576     | <0.001   | <b>&lt;0.001</b> | -0.648                    | -13.085   | <0.001   | <b>&lt;0.001</b> | -0.498                    | 0.001     | <0.001   | <b>&lt;0.001</b> | -0.659                    | 0.001     | <0.001   | <b>&lt;0.001</b> |
| Sex                             | -0.084                    | -1.597    | 0.11     | 0.25             | -0.027                    | -0.594    | 0.55     | 0.65             | -0.071                    | 0.004     | 0.16     | 0.18             | 0.004                     | 0.003     | 0.92     | 0.92             |
| IL-10:INR                       | -0.078                    | -1.052    | 0.29     | 0.95             | -0.003                    | -0.041    | 0.97     | 0.98             | -0.003                    | 0.001     | 0.97     | 0.97             | 0.011                     | 0.001     | 0.86     | 0.95             |
| <b>TNF-<math>\alpha</math></b>  |                           |           |          |                  |                           |           |          |                  |                           |           |          |                  |                           |           |          |                  |
| <b>Corpus Callosum</b>          |                           |           |          |                  |                           |           |          |                  |                           |           |          |                  |                           |           |          |                  |
|                                 | <b>FA</b>                 |           |          |                  | <b>MD</b>                 |           |          |                  | <b>AD</b>                 |           |          |                  | <b>RD</b>                 |           |          |                  |
|                                 | <b><math>\beta</math></b> | <b>SE</b> | <b>p</b> | <b>q</b>         | <b><math>\beta</math></b> | <b>SE</b> | <b>p</b> | <b>q</b>         | <b><math>\beta</math></b> | <b>SE</b> | <b>p</b> | <b>q</b>         | <b><math>\beta</math></b> | <b>SE</b> | <b>p</b> | <b>q</b>         |
| TNF- $\alpha$                   | 0.073                     | 0.003     | 0.29     | 0.65             | -0.091                    | 0.003     | 0.17     | 0.43             | -0.064                    | 0.003     | 0.41     | 0.62             | -0.083                    | 0.004     | 0.20     | 0.50             |
| INR                             | 0.056                     | 0.001     | 0.27     | 0.69             | 0.030                     | 0.001     | 0.54     | 0.54             | 0.132                     | 0.001     | 0.02     | <b>0.03</b>      | -0.008                    | 0.001     | 0.87     | 0.87             |
| NICU stay                       | -0.105                    | 0.007     | 0.09     | 0.31             | -0.001                    | 0.007     | 0.99     | 0.99             | -0.004                    | 0.007     | 0.95     | 0.97             | 0.031                     | 0.010     | 0.60     | 0.75             |
| GA at delivery                  | 0.014                     | 0.001     | 0.83     | 0.83             | 0.001                     | 0.001     | 0.99     | 0.99             | 0.107                     | 0.001     | 0.16     | 0.40             | -0.026                    | 0.002     | 0.69     | 0.87             |
| PMA at scan                     | 0.457                     | 0.001     | <0.001   | <b>&lt;0.001</b> | -0.586                    | 0.001     | <0.001   | <b>&lt;0.001</b> | -0.240                    | 0.001     | <0.001   | <b>&lt;0.001</b> | -0.566                    | 0.002     | <0.001   | <b>&lt;0.001</b> |
| Sex                             | -0.105                    | 0.003     | 0.03     | 0.15             | -0.008                    | 0.003     | 0.87     | 0.87             | -0.094                    | 0.003     | 0.10     | 0.13             | 0.049                     | 0.004     | 0.30     | 0.67             |
| TNF- $\alpha$ :INR              | -0.075                    | 0.001     | 0.27     | 0.76             | 0.047                     | 0.001     | 0.47     | 0.71             | -0.003                    | 0.001     | 0.97     | 0.97             | 0.055                     | 0.001     | 0.40     | 0.72             |
| <b>Superior Cingulum Bundle</b> |                           |           |          |                  |                           |           |          |                  |                           |           |          |                  |                           |           |          |                  |
| TNF- $\alpha$                   | 0.034                     | 0.002     | 0.64     | 0.84             | -0.081                    | 0.004     | 0.23     | 0.43             | -0.060                    | 0.004     | 0.41     | 0.62             | -0.073                    | 0.004     | 0.29     | 0.52             |
| INR                             | -0.104                    | 0.000     | 0.06     | 0.27             | 0.141                     | 0.001     | 0.01     | <b>0.01</b>      | 0.076                     | 0.001     | 0.16     | 0.18             | 0.149                     | 0.001     | <0.01    | <b>0.02</b>      |
| NICU stay                       | -0.066                    | 0.006     | 0.33     | 0.46             | 0.079                     | 0.009     | 0.20     | 0.74             | 0.033                     | 0.011     | 0.62     | 0.97             | 0.085                     | 0.011     | 0.17     | 0.49             |
| GA at delivery                  | 0.033                     | 0.001     | 0.64     | 0.83             | 0.058                     | 0.002     | 0.39     | 0.87             | 0.082                     | 0.002     | 0.25     | 0.40             | 0.035                     | 0.002     | 0.60     | 0.87             |
| PMA at scan                     | 0.355                     | 0.001     | <0.001   | <b>&lt;0.001</b> | -0.541                    | 0.002     | <0.001   | <b>&lt;0.001</b> | -0.416                    | 0.002     | <0.001   | <b>&lt;0.001</b> | -0.522                    | 0.002     | <0.001   | <b>&lt;0.001</b> |
| Sex                             | -0.109                    | 0.003     | 0.04     | 0.15             | -0.026                    | 0.004     | 0.59     | 0.66             | -0.122                    | 0.005     | 0.02     | 0.05             | 0.020                     | 0.005     | 0.69     | 0.82             |
| TNF- $\alpha$ :INR              | -0.029                    | 0.001     | 0.70     | 0.90             | 0.122                     | 0.001     | 0.07     | 0.40             | 0.123                     | 0.001     | 0.09     | 0.28             | 0.100                     | 0.001     | 0.15     | 0.49             |
| <b>Corticospinal Tract</b>      |                           |           |          |                  |                           |           |          |                  |                           |           |          |                  |                           |           |          |                  |
| TNF- $\alpha$                   | -0.016                    | 0.002     | 0.81     | 0.84             | 0.007                     | 0.003     | 0.90     | 0.90             | -0.021                    | 0.003     | 0.73     | 0.81             | 0.002                     | 0.004     | 0.97     | 0.97             |
| INR                             | 0.050                     | 0.000     | 0.30     | 0.69             | 0.108                     | 0.001     | 0.01     | <b>0.02</b>      | 0.225                     | 0.001     | <0.001   | <b>&lt;0.001</b> | 0.063                     | 0.001     | 0.15     | 0.17             |
| NICU stay                       | -0.033                    | 0.006     | 0.58     | 0.66             | 0.023                     | 0.009     | 0.66     | 0.74             | 0.030                     | 0.007     | 0.58     | 0.97             | 0.023                     | 0.011     | 0.67     | 0.75             |
| GA at delivery                  | 0.018                     | 0.001     | 0.78     | 0.83             | -0.004                    | 0.001     | 0.94     | 0.99             | 0.027                     | 0.001     | 0.65     | 0.69             | 0.010                     | 0.002     | 0.86     | 0.87             |
| PMA at scan                     | 0.538                     | 0.001     | <0.001   | <b>&lt;0.001</b> | -0.717                    | 0.001     | <0.001   | <b>&lt;0.001</b> | -0.663                    | 0.001     | <0.001   | <b>&lt;0.001</b> | -0.691                    | 0.002     | <0.001   | <b>&lt;0.001</b> |
| Sex                             | -0.002                    | 0.003     | 0.96     | 0.99             | -0.041                    | 0.004     | 0.31     | 0.58             | -0.067                    | 0.003     | 0.13     | 0.15             | -0.027                    | 0.005     | 0.53     | 0.82             |
| TNF- $\alpha$ :INR              | -0.031                    | 0.001     | 0.64     | 0.90             | 0.004                     | 0.001     | 0.95     | 0.95             | -0.016                    | 0.001     | 0.79     | 0.91             | 0.020                     | 0.001     | 0.73     | 0.83             |
| <b>Optic Radiation</b>          |                           |           |          |                  |                           |           |          |                  |                           |           |          |                  |                           |           |          |                  |
| TNF- $\alpha$                   | -0.017                    | 0.003     | 0.79     | 0.84             | 0.022                     | 0.004     | 0.71     | 0.80             | 0.017                     | 0.004     | 0.81     | 0.81             | 0.025                     | 0.005     | 0.67     | 0.95             |

|                                             |        |       |        |                  |        |       |        |                  |        |       |        |                  |        |       |        |                  |
|---------------------------------------------|--------|-------|--------|------------------|--------|-------|--------|------------------|--------|-------|--------|------------------|--------|-------|--------|------------------|
| INR                                         | 0.041  | 0.001 | 0.40   | 0.71             | 0.170  | 0.001 | <0.001 | <b>&lt;0.01</b>  | 0.265  | 0.001 | <0.001 | <b>&lt;0.001</b> | 0.119  | 0.001 | 0.01   | <b>0.02</b>      |
| NICU stay                                   | -0.158 | 0.007 | 0.01   | 0.07             | 0.093  | 0.010 | 0.09   | 0.74             | -0.002 | 0.010 | 0.97   | 0.97             | 0.120  | 0.012 | 0.03   | 0.24             |
| GA at delivery                              | -0.018 | 0.001 | 0.77   | 0.83             | -0.061 | 0.002 | 0.31   | 0.87             | -0.078 | 0.002 | 0.27   | 0.40             | -0.044 | 0.002 | 0.44   | 0.87             |
| PMA at scan                                 | 0.543  | 0.001 | <0.001 | <b>&lt;0.001</b> | -0.601 | 0.002 | <0.001 | <b>&lt;0.001</b> | -0.344 | 0.002 | <0.001 | <b>&lt;0.001</b> | -0.628 | 0.002 | <0.001 | <b>&lt;0.001</b> |
| Sex                                         | -0.017 | 0.003 | 0.72   | 0.93             | -0.122 | 0.005 | 0.01   | 0.05             | -0.202 | 0.005 | <0.001 | <b>&lt;0.01</b>  | -0.084 | 0.005 | 0.05   | 0.27             |
| TNF- $\alpha$ :INR                          | -0.010 | 0.001 | 0.88   | 0.97             | -0.014 | 0.001 | 0.82   | 0.92             | -0.017 | 0.001 | 0.81   | 0.91             | -0.012 | 0.001 | 0.84   | 0.84             |
| <b>Uncinate Fasciculus</b>                  |        |       |        |                  |        |       |        |                  |        |       |        |                  |        |       |        |                  |
| TNF- $\alpha$                               | -0.115 | 0.002 | 0.08   | 0.34             | -0.036 | 0.003 | 0.59   | 0.76             | -0.124 | 0.004 | 0.10   | 0.22             | 0.009  | 0.004 | 0.89   | 0.97             |
| INR                                         | 0.010  | 0.000 | 0.83   | 0.96             | 0.116  | 0.001 | 0.02   | <b>0.03</b>      | 0.133  | 0.001 | 0.02   | <b>0.03</b>      | 0.086  | 0.001 | 0.07   | 0.09             |
| NICU stay                                   | -0.055 | 0.005 | 0.36   | 0.46             | -0.027 | 0.009 | 0.66   | 0.74             | -0.075 | 0.011 | 0.27   | 0.97             | 0.002  | 0.009 | 0.97   | 0.97             |
| GA at delivery                              | 0.078  | 0.001 | 0.22   | 0.49             | 0.058  | 0.001 | 0.37   | 0.87             | 0.124  | 0.002 | 0.09   | 0.40             | 0.016  | 0.002 | 0.79   | 0.87             |
| PMA at scan                                 | 0.508  | 0.001 | <0.001 | <b>&lt;0.001</b> | -0.588 | 0.001 | <0.001 | <b>&lt;0.001</b> | -0.301 | 0.002 | <0.001 | <b>&lt;0.001</b> | -0.635 | 0.002 | <0.001 | <b>&lt;0.001</b> |
| Sex                                         | -0.085 | 0.002 | 0.07   | 0.16             | -0.048 | 0.004 | 0.32   | 0.58             | -0.118 | 0.005 | 0.03   | 0.05             | -0.011 | 0.004 | 0.81   | 0.82             |
| TNF- $\alpha$ :INR                          | 0.002  | 0.000 | 0.97   | 0.97             | -0.028 | 0.001 | 0.68   | 0.87             | -0.032 | 0.001 | 0.67   | 0.91             | -0.025 | 0.001 | 0.70   | 0.83             |
| <b>Inferior Fronto-Occipital Fasciculus</b> |        |       |        |                  |        |       |        |                  |        |       |        |                  |        |       |        |                  |
| TNF- $\alpha$                               | 0.050  | 0.002 | 0.39   | 0.70             | -0.069 | 0.004 | 0.24   | 0.43             | -0.047 | 0.003 | 0.50   | 0.65             | -0.070 | 0.005 | 0.22   | 0.50             |
| INR                                         | -0.006 | 0.000 | 0.89   | 0.96             | 0.124  | 0.001 | <0.01  | <b>0.01</b>      | 0.225  | 0.001 | <0.001 | <b>&lt;0.001</b> | 0.095  | 0.001 | 0.03   | <b>0.04</b>      |
| NICU stay                                   | -0.073 | 0.006 | 0.17   | 0.39             | 0.053  | 0.010 | 0.32   | 0.74             | 0.027  | 0.008 | 0.67   | 0.97             | 0.061  | 0.012 | 0.24   | 0.49             |
| GA at delivery                              | 0.090  | 0.001 | 0.12   | 0.35             | -0.034 | 0.002 | 0.55   | 0.94             | 0.080  | 0.001 | 0.24   | 0.40             | -0.057 | 0.002 | 0.31   | 0.87             |
| PMA at scan                                 | 0.614  | 0.001 | <0.001 | <b>&lt;0.001</b> | -0.668 | 0.002 | <0.001 | <b>&lt;0.001</b> | -0.481 | 0.001 | <0.001 | <b>&lt;0.001</b> | -0.670 | 0.002 | <0.001 | <b>&lt;0.001</b> |
| Sex                                         | 0.000  | 0.003 | 0.99   | 0.99             | -0.101 | 0.004 | 0.02   | 0.05             | -0.169 | 0.003 | <0.01  | <b>&lt;0.01</b>  | -0.070 | 0.005 | 0.09   | 0.27             |
| TNF- $\alpha$ :INR                          | -0.057 | 0.001 | 0.34   | 0.76             | 0.058  | 0.001 | 0.32   | 0.58             | 0.049  | 0.001 | 0.48   | 0.87             | 0.063  | 0.001 | 0.27   | 0.60             |
| <b>Anterior Limb of Internal Capsule</b>    |        |       |        |                  |        |       |        |                  |        |       |        |                  |        |       |        |                  |
| TNF- $\alpha$                               | 0.075  | 0.002 | 0.20   | 0.61             | -0.133 | 0.005 | 0.03   | 0.15             | -0.131 | 0.004 | 0.07   | 0.21             | -0.126 | 0.005 | 0.04   | 0.21             |
| INR                                         | -0.028 | 0.000 | 0.52   | 0.78             | 0.115  | 0.001 | 0.01   | <b>0.02</b>      | 0.138  | 0.001 | 0.01   | <b>0.02</b>      | 0.100  | 0.001 | 0.03   | <b>0.04</b>      |
| NICU stay                                   | -0.052 | 0.005 | 0.33   | 0.46             | 0.056  | 0.012 | 0.33   | 0.74             | 0.039  | 0.010 | 0.55   | 0.97             | 0.061  | 0.014 | 0.27   | 0.49             |
| GA at delivery                              | 0.134  | 0.001 | 0.02   | 0.18             | -0.025 | 0.002 | 0.68   | 0.94             | 0.081  | 0.002 | 0.25   | 0.40             | -0.054 | 0.002 | 0.36   | 0.87             |
| PMA at scan                                 | 0.597  | 0.001 | <0.001 | <b>&lt;0.001</b> | -0.603 | 0.002 | <0.001 | <b>&lt;0.001</b> | -0.462 | 0.002 | <0.001 | <b>&lt;0.001</b> | -0.623 | 0.002 | <0.001 | <b>&lt;0.001</b> |
| Sex                                         | -0.028 | 0.002 | 0.51   | 0.76             | -0.036 | 0.005 | 0.43   | 0.64             | -0.057 | 0.005 | 0.27   | 0.27             | -0.023 | 0.006 | 0.59   | 0.82             |
| TNF- $\alpha$ :INR                          | -0.071 | 0.000 | 0.23   | 0.76             | 0.094  | 0.001 | 0.13   | 0.40             | 0.082  | 0.001 | 0.26   | 0.57             | 0.093  | 0.001 | 0.13   | 0.49             |
| <b>Inferior Cingulum Bundle</b>             |        |       |        |                  |        |       |        |                  |        |       |        |                  |        |       |        |                  |
| TNF- $\alpha$                               | -0.180 | 0.002 | 0.01   | 0.11             | -0.048 | 0.002 | 0.44   | 0.66             | -0.177 | 0.003 | 0.02   | 0.10             | 0.021  | 0.002 | 0.74   | 0.95             |
| INR                                         | -0.003 | 0.000 | 0.96   | 0.96             | 0.201  | 0.000 | <0.001 | <b>&lt;0.001</b> | 0.208  | 0.001 | <0.001 | <b>&lt;0.001</b> | 0.157  | 0.000 | <0.01  | <b>0.01</b>      |
| NICU stay                                   | -0.107 | 0.005 | 0.10   | 0.31             | 0.035  | 0.005 | 0.54   | 0.74             | -0.035 | 0.007 | 0.60   | 0.97             | 0.079  | 0.006 | 0.16   | 0.49             |
| GA at delivery                              | -0.138 | 0.001 | 0.05   | 0.23             | 0.076  | 0.001 | 0.22   | 0.87             | -0.029 | 0.001 | 0.69   | 0.69             | 0.123  | 0.001 | 0.04   | 0.40             |
| PMA at scan                                 | 0.444  | 0.001 | <0.001 | <b>&lt;0.001</b> | -0.639 | 0.001 | <0.001 | <b>&lt;0.001</b> | -0.340 | 0.001 | <0.001 | <b>&lt;0.001</b> | -0.664 | 0.001 | <0.001 | <b>&lt;0.001</b> |
| Sex                                         | -0.038 | 0.002 | 0.47   | 0.76             | -0.111 | 0.002 | 0.01   | 0.05             | -0.130 | 0.003 | 0.01   | <b>0.04</b>      | -0.081 | 0.003 | 0.07   | 0.27             |
| TNF- $\alpha$ :INR                          | 0.085  | 0.000 | 0.24   | 0.76             | 0.082  | 0.000 | 0.19   | 0.43             | 0.145  | 0.001 | 0.05   | 0.28             | 0.035  | 0.001 | 0.57   | 0.83             |
| <b>Fornix</b>                               |        |       |        |                  |        |       |        |                  |        |       |        |                  |        |       |        |                  |
| TNF- $\alpha$                               | 0.015  | 0.001 | 0.84   | 0.84             | -0.144 | 0.002 | 0.02   | 0.15             | -0.159 | 0.003 | 0.02   | 0.10             | -0.122 | 0.002 | 0.05   | 0.21             |
| INR                                         | -0.159 | 0.000 | <0.01  | <b>0.03</b>      | 0.087  | 0.000 | 0.06   | 0.07             | 0.028  | 0.001 | 0.59   | 0.59             | 0.118  | 0.000 | 0.01   | <b>0.02</b>      |
| NICU stay                                   | -0.022 | 0.004 | 0.74   | 0.74             | 0.036  | 0.006 | 0.53   | 0.74             | 0.018  | 0.008 | 0.78   | 0.97             | 0.041  | 0.006 | 0.46   | 0.68             |
| GA at delivery                              | 0.028  | 0.001 | 0.70   | 0.83             | 0.021  | 0.001 | 0.73   | 0.94             | 0.037  | 0.001 | 0.59   | 0.69             | 0.010  | 0.001 | 0.87   | 0.87             |
| PMA at scan                                 | 0.374  | 0.001 | <0.001 | <b>&lt;0.001</b> | -0.644 | 0.001 | <0.001 | <b>&lt;0.001</b> | -0.493 | 0.001 | <0.001 | <b>&lt;0.001</b> | -0.655 | 0.001 | <0.001 | <b>&lt;0.001</b> |



|                    |        |       |      |      |        |       |      |      |        |       |      |      |       |       |      |      |
|--------------------|--------|-------|------|------|--------|-------|------|------|--------|-------|------|------|-------|-------|------|------|
| Sex                | -0.105 | 0.002 | 0.05 | 0.15 | -0.028 | 0.003 | 0.53 | 0.66 | -0.084 | 0.004 | 0.09 | 0.13 | 0.010 | 0.003 | 0.82 | 0.82 |
| TNF- $\alpha$ :INR | -0.029 | 0.000 | 0.70 | 0.90 | 0.103  | 0.001 | 0.10 | 0.40 | 0.130  | 0.001 | 0.06 | 0.28 | 0.085 | 0.001 | 0.16 | 0.49 |

$\beta$ , standardized beta coefficient; SE, standard error;  $q$ , FDR-corrected p-value; IL, interleukin; TNF- $\alpha$ , tumor necrosis factor alpha; FA, fractional anisotropy; MD, mean diffusivity; AD, axial diffusivity; RD, radial diffusivity; GA, gestational age; PMA, infant postmenstrual age; INR, income-to-needs ratio.

We performed a series of specificity tests excluding neonates born <34 weeks' gestation and/or weighing <2,000g at birth to examine if results held. As seen in Table S6, there was a positive relationship between family SES group and 1) CC AD; 2) CB MD and RD; 3) CST MD and RD; 4) OR MD, AD, and RD; 5) IFOF MD, AD, and RD; 6) ALIC MD and AD; 7) CBIF MD, AD, and RD; and 8) FX MD and RD. These results similarly reflect those in the main analysis where all neonates were included.

**Table S8.** Specificity test excluding neonates born <34 weeks' gestation and/or weighing <2,000g at birth. Multiple linear regression results of the association between family socioeconomic status group and neonatal dMRI parameters.

|                                             | FA      |       |          |                  | MD      |       |          |                  | AD      |       |          |                  | RD      |       |          |                  |
|---------------------------------------------|---------|-------|----------|------------------|---------|-------|----------|------------------|---------|-------|----------|------------------|---------|-------|----------|------------------|
|                                             | $\beta$ | SE    | <i>p</i> | <i>q</i>         | $\beta$ | SE    | <i>p</i> | <i>q</i>         | $\beta$ | SE    | <i>p</i> | <i>q</i>         | $\beta$ | SE    | <i>p</i> | <i>q</i>         |
| <b>Corpus Callosum</b>                      |         |       |          |                  |         |       |          |                  |         |       |          |                  |         |       |          |                  |
| SES group                                   | 0.095   | 0.003 | 0.06     | 0.19             | -0.010  | 0.003 | 0.83     | 0.83             | 0.153   | 0.004 | 0.01     | <b>0.01</b>      | -0.055  | 0.004 | 0.27     | 0.27             |
| GA at delivery                              | 0.038   | 0.001 | 0.49     | 0.63             | 0.050   | 0.001 | 0.35     | 0.46             | 0.095   | 0.001 | 0.13     | 0.40             | 0.023   | 0.002 | 0.67     | 0.87             |
| PMA at scan                                 | 0.469   | 0.001 | <0.001   | <b>&lt;0.001</b> | -0.575  | 0.001 | <0.001   | <b>&lt;0.001</b> | -0.222  | 0.001 | <0.001   | <b>&lt;0.001</b> | -0.567  | 0.002 | <0.001   | <b>&lt;0.001</b> |
| Sex                                         | -0.084  | 0.003 | 0.09     | 0.23             | -0.014  | 0.003 | 0.77     | 0.77             | -0.095  | 0.003 | 0.10     | 0.13             | 0.040   | 0.004 | 0.41     | 0.74             |
| <b>Superior Cingulum Bundle</b>             |         |       |          |                  |         |       |          |                  |         |       |          |                  |         |       |          |                  |
| SES group                                   | -0.155  | 0.003 | 0.01     | 0.05             | 0.159   | 0.004 | <0.01    | <b>0.01</b>      | 0.057   | 0.005 | 0.30     | 0.30             | 0.182   | 0.005 | <0.001   | <b>&lt;0.01</b>  |
| GA at delivery                              | 0.132   | 0.001 | 0.03     | 0.06             | -0.051  | 0.002 | 0.35     | 0.46             | 0.029   | 0.002 | 0.63     | 0.83             | -0.082  | 0.002 | 0.14     | 0.25             |
| PMA at scan                                 | 0.313   | 0.001 | <0.001   | <b>&lt;0.001</b> | -0.505  | 0.002 | <0.001   | <b>&lt;0.001</b> | -0.403  | 0.002 | <0.001   | <b>&lt;0.001</b> | -0.480  | 0.002 | <0.001   | <b>&lt;0.001</b> |
| Sex                                         | -0.097  | 0.003 | 0.07     | 0.23             | -0.044  | 0.004 | 0.37     | 0.54             | -0.135  | 0.005 | 0.01     | <b>0.03</b>      | 0.002   | 0.005 | 0.97     | 0.97             |
| <b>Corticospinal Tract</b>                  |         |       |          |                  |         |       |          |                  |         |       |          |                  |         |       |          |                  |
| SES group                                   | 0.039   | 0.003 | 0.43     | 0.70             | 0.112   | 0.004 | 0.01     | <b>0.01</b>      | 0.224   | 0.004 | <0.001   | <b>&lt;0.001</b> | 0.066   | 0.005 | 0.13     | 0.15             |
| GA at delivery                              | 0.040   | 0.001 | 0.45     | 0.63             | 0.019   | 0.002 | 0.68     | 0.76             | 0.056   | 0.001 | 0.26     | 0.58             | 0.002   | 0.002 | 0.97     | 0.97             |
| PMA at scan                                 | 0.540   | 0.001 | <0.001   | <b>&lt;0.001</b> | -0.711  | 0.002 | <0.001   | <b>&lt;0.001</b> | -0.641  | 0.001 | <0.001   | <b>&lt;0.001</b> | -0.685  | 0.002 | <0.001   | <b>&lt;0.001</b> |
| Sex                                         | -0.009  | 0.003 | 0.86     | 0.93             | -0.050  | 0.004 | 0.24     | 0.43             | -0.085  | 0.003 | 0.06     | 0.09             | -0.035  | 0.005 | 0.41     | 0.74             |
| <b>Optic Radiation</b>                      |         |       |          |                  |         |       |          |                  |         |       |          |                  |         |       |          |                  |
| SES group                                   | 0.075   | 0.003 | 0.13     | 0.30             | 0.178   | 0.005 | <0.001   | <b>&lt;0.01</b>  | 0.304   | 0.005 | <0.001   | <b>&lt;0.001</b> | 0.116   | 0.006 | 0.01     | <b>0.02</b>      |
| GA at delivery                              | 0.012   | 0.001 | 0.83     | 0.83             | -0.110  | 0.002 | 0.03     | 0.26             | -0.127  | 0.002 | 0.02     | 0.11             | -0.091  | 0.002 | 0.07     | 0.15             |
| PMA at scan                                 | 0.531   | 0.001 | <0.001   | <b>&lt;0.001</b> | -0.570  | 0.002 | <0.001   | <b>&lt;0.001</b> | -0.313  | 0.002 | <0.001   | <b>&lt;0.001</b> | -0.603  | 0.002 | <0.001   | <b>&lt;0.001</b> |
| Sex                                         | 0.004   | 0.003 | 0.93     | 0.93             | -0.128  | 0.005 | <0.01    | <b>0.04</b>      | -0.191  | 0.005 | <0.001   | <b>&lt;0.01</b>  | -0.097  | 0.006 | 0.03     | 0.14             |
| <b>Uncinate Fasciculus</b>                  |         |       |          |                  |         |       |          |                  |         |       |          |                  |         |       |          |                  |
| SES group                                   | -0.036  | 0.003 | 0.47     | 0.70             | 0.141   | 0.004 | 0.01     | <b>0.01</b>      | 0.129   | 0.005 | 0.02     | <b>0.03</b>      | 0.123   | 0.004 | 0.01     | <b>0.02</b>      |
| GA at delivery                              | 0.129   | 0.001 | 0.02     | 0.05             | 0.065   | 0.002 | 0.23     | 0.46             | 0.170   | 0.002 | 0.01     | 0.05             | 0.003   | 0.002 | 0.95     | 0.97             |
| PMA at scan                                 | 0.489   | 0.001 | <0.001   | <b>&lt;0.001</b> | -0.565  | 0.001 | <0.001   | <b>&lt;0.001</b> | -0.288  | 0.002 | <0.001   | <b>&lt;0.001</b> | -0.612  | 0.002 | <0.001   | <b>&lt;0.001</b> |
| Sex                                         | -0.081  | 0.002 | 0.10     | 0.23             | -0.067  | 0.004 | 0.17     | 0.39             | -0.135  | 0.005 | 0.02     | <b>0.03</b>      | -0.029  | 0.004 | 0.54     | 0.75             |
| <b>Inferior Fronto-Occipital Fasciculus</b> |         |       |          |                  |         |       |          |                  |         |       |          |                  |         |       |          |                  |
| SES group                                   | -0.001  | 0.003 | 0.98     | 0.98             | 0.133   | 0.005 | <0.01    | <b>0.01</b>      | 0.243   | 0.004 | <0.001   | <b>&lt;0.001</b> | 0.096   | 0.006 | 0.03     | <b>0.04</b>      |
| GA at delivery                              | 0.139   | 0.001 | 0.00     | <b>0.04</b>      | -0.083  | 0.002 | 0.08     | 0.27             | 0.019   | 0.001 | 0.74     | 0.83             | -0.105  | 0.002 | 0.03     | 0.15             |
| PMA at scan                                 | 0.594   | 0.001 | <0.001   | <b>&lt;0.001</b> | -0.643  | 0.002 | <0.001   | <b>&lt;0.001</b> | -0.461  | 0.001 | <0.001   | <b>&lt;0.001</b> | -0.647  | 0.002 | <0.001   | <b>&lt;0.001</b> |
| Sex                                         | 0.005   | 0.003 | 0.92     | 0.93             | -0.109  | 0.005 | 0.01     | <b>0.04</b>      | -0.175  | 0.004 | <0.01    | <b>&lt;0.01</b>  | -0.077  | 0.006 | 0.07     | 0.21             |
| <b>Anterior Limb of Internal Capsule</b>    |         |       |          |                  |         |       |          |                  |         |       |          |                  |         |       |          |                  |
| SES group                                   | 0.011   | 0.003 | 0.80     | 0.90             | 0.121   | 0.006 | 0.01     | <b>0.01</b>      | 0.176   | 0.005 | <0.01    | <b>&lt;0.01</b>  | 0.096   | 0.007 | 0.04     | 0.05             |
| GA at delivery                              | 0.117   | 0.001 | 0.02     | 0.05             | -0.087  | 0.002 | 0.09     | 0.27             | -0.019  | 0.002 | 0.74     | 0.83             | -0.101  | 0.002 | 0.04     | 0.15             |

|                                 |        |       |        |                  |        |       |        |                  |        |       |        |                  |        |       |        |                  |
|---------------------------------|--------|-------|--------|------------------|--------|-------|--------|------------------|--------|-------|--------|------------------|--------|-------|--------|------------------|
| PMA at scan                     | 0.595  | 0.001 | <0.001 | <b>&lt;0.001</b> | -0.579 | 0.002 | <0.001 | <b>&lt;0.001</b> | -0.440 | 0.002 | <0.001 | <b>&lt;0.001</b> | -0.601 | 0.002 | <0.001 | <b>&lt;0.001</b> |
| Sex                             | -0.028 | 0.002 | 0.53   | 0.93             | -0.037 | 0.006 | 0.42   | 0.54             | -0.059 | 0.005 | 0.25   | 0.25             | -0.025 | 0.006 | 0.58   | 0.75             |
| <b>Inferior Cingulum Bundle</b> |        |       |        |                  |        |       |        |                  |        |       |        |                  |        |       |        |                  |
| SES group                       | -0.032 | 0.002 | 0.56   | 0.72             | 0.200  | 0.003 | <0.001 | <b>&lt;0.001</b> | 0.182  | 0.004 | <0.01  | <b>&lt;0.01</b>  | 0.160  | 0.003 | <0.01  | <b>&lt;0.01</b>  |
| GA at delivery                  | -0.101 | 0.001 | 0.09   | 0.16             | 0.057  | 0.001 | 0.26   | 0.46             | -0.036 | 0.001 | 0.55   | 0.83             | 0.096  | 0.001 | 0.06   | 0.15             |
| PMA at scan                     | 0.421  | 0.001 | <0.001 | <b>&lt;0.001</b> | -0.618 | 0.001 | <0.001 | <b>&lt;0.001</b> | -0.330 | 0.001 | <0.001 | <b>&lt;0.001</b> | -0.643 | 0.001 | <0.001 | <b>&lt;0.001</b> |
| Sex                             | -0.006 | 0.002 | 0.91   | 0.93             | -0.120 | 0.002 | 0.01   | <b>0.04</b>      | -0.112 | 0.003 | 0.04   | 0.07             | -0.103 | 0.003 | 0.03   | 0.14             |
| <b>Fornix</b>                   |        |       |        |                  |        |       |        |                  |        |       |        |                  |        |       |        |                  |
| SES group                       | -0.109 | 0.002 | 0.05   | 0.19             | 0.114  | 0.003 | 0.01   | <b>0.02</b>      | 0.071  | 0.004 | 0.17   | 0.20             | 0.129  | 0.003 | 0.01   | <b>0.02</b>      |
| GA at delivery                  | 0.025  | 0.001 | 0.68   | 0.76             | -0.013 | 0.001 | 0.79   | 0.79             | 0.005  | 0.001 | 0.92   | 0.92             | -0.021 | 0.001 | 0.68   | 0.87             |
| PMA at scan                     | 0.355  | 0.001 | <0.001 | <b>&lt;0.001</b> | -0.634 | 0.001 | <0.001 | <b>&lt;0.001</b> | -0.492 | 0.001 | <0.001 | <b>&lt;0.001</b> | -0.640 | 0.001 | <0.001 | <b>&lt;0.001</b> |
| Sex                             | -0.091 | 0.002 | 0.09   | 0.23             | -0.031 | 0.003 | 0.50   | 0.56             | -0.079 | 0.004 | 0.12   | 0.14             | 0.003  | 0.003 | 0.94   | 0.97             |

Bolded values represent statistical significance after FDR correction for multiple comparisons.  $\beta$ , standardized beta coefficient; SE, standard error;  $q$ , FDR-corrected p-value; FA, fractional anisotropy; MD, mean diffusivity; AD, axial diffusivity; RD, radial diffusivity; GA, gestational age; PMA, infant postmenstrual age; Sex, child sex.

Excluding neonates born <34 weeks' gestation and/or weighing <2,000g at birth, there was a negative relationship between average maternal IL-6 and 1) CST FA; 2) OR AD; 3) UF MD and AD; 4) IFOF AD; and 5) ALIC AD. There was a negative relationship between average maternal IL-10 and CST, IFOF, and CBIF AD but a positive relationship with CST MD and RD and CBIF RD.

**Table S9.** Specificity test excluding neonates born <34 weeks' gestation and/or weighing <2,000g at birth. Multiple linear regression results of the association between maternal cytokine concentrations and neonatal dMRI parameters.

|                                 | IL-6    |       |          |                  |         |       |          |                  |         |       |                  |                  |         |      |          |          |                  |
|---------------------------------|---------|-------|----------|------------------|---------|-------|----------|------------------|---------|-------|------------------|------------------|---------|------|----------|----------|------------------|
|                                 | FA      |       |          |                  | MD      |       |          |                  | AD      |       |                  |                  | RD      |      |          |          |                  |
|                                 | $\beta$ | SE    | <i>p</i> | <i>q</i>         | $\beta$ | SE    | <i>p</i> | <i>q</i>         | $\beta$ | SE    | <i>p</i>         | <i>q</i>         | $\beta$ | SE   | <i>p</i> | <i>q</i> |                  |
| <b>Corpus Callosum</b>          |         |       |          |                  |         |       |          |                  |         |       |                  |                  |         |      |          |          |                  |
| IL-6                            | -0.093  | 0.002 | 0.07     | 0.12             | -0.006  | 0.002 | 0.91     | 0.91             | -0.106  | 0.002 | 0.06             | 0.08             | 0.036   | 0.00 | 2        | 0.46     | 0.59             |
| GA at delivery                  | 0.035   | 0.001 | 0.53     | 0.79             | 0.023   | 0.001 | 0.66     | 0.74             | 0.066   | 0.001 | 0.29             | 0.62             | 0.006   | 0.00 | 2        | 0.91     | 1.00             |
| PMA at scan                     | 0.468   | 0.001 | <0.001   | <b>&lt;0.001</b> | -0.568  | 0.001 | <0.001   | <b>&lt;0.001</b> | -0.203  | 0.001 | <0.01            | <b>&lt;0.01</b>  | -0.561  | 0.00 | 2        | <0.001   | <b>&lt;0.001</b> |
| Sex                             | -0.074  | 0.003 | 0.14     | 0.42             | -0.010  | 0.003 | 0.84     | 0.84             | -0.080  | 0.003 | 0.16             | 0.18             | 0.038   | 0.00 | 4        | 0.43     | 0.65             |
| <b>Superior Cingulum Bundle</b> |         |       |          |                  |         |       |          |                  |         |       |                  |                  |         |      |          |          |                  |
| IL-6                            | 0.080   | 0.002 | 0.14     | 0.21             | -0.081  | 0.002 | 0.11     | 0.24             | -0.027  | 0.003 | 0.62             | 0.62             | -0.093  | 0.00 | 3        | 0.07     | 0.22             |
| GA at delivery                  | 0.125   | 0.001 | 0.04     | 0.08             | -0.060  | 0.002 | 0.27     | 0.41             | 0.014   | 0.002 | 0.81             | 0.91             | -0.087  | 0.00 | 2        | 0.11     | 0.22             |
| PMA at scan                     | 0.307   | 0.001 | <0.001   | <b>&lt;0.001</b> | -0.491  | 0.002 | <0.001   | <b>&lt;0.001</b> | -0.393  | 0.002 | <b>&lt;0.001</b> | <b>&lt;0.001</b> | -0.466  | 0.00 | 2        | <0.001   | <b>&lt;0.001</b> |
| Sex                             | -0.093  | 0.003 | 0.08     | 0.42             | -0.041  | 0.004 | 0.41     | 0.55             | -0.131  | 0.005 | 0.01             | <b>0.04</b>      | 0.004   | 0.00 | 5        | 0.93     | 0.98             |
| <b>Corticospinal Tract</b>      |         |       |          |                  |         |       |          |                  |         |       |                  |                  |         |      |          |          |                  |
| IL-6                            | -0.197  | 0.002 | <0.001   | <b>&lt;0.001</b> | 0.056   | 0.002 | 0.19     | 0.28             | -0.103  | 0.002 | 0.03             | 0.05             | 0.103   | 0.00 | 3        | 0.02     | 0.15             |
| GA at delivery                  | -0.023  | 0.001 | 0.65     | 0.84             | 0.054   | 0.002 | 0.23     | 0.41             | 0.055   | 0.001 | 0.27             | 0.62             | 0.047   | 0.00 | 2        | 0.31     | 0.47             |
| PMA at scan                     | 0.549   | 0.001 | <0.001   | <b>&lt;0.001</b> | -0.708  | 0.001 | <0.001   | <b>&lt;0.001</b> | -0.628  | 0.001 | <0.001           | <b>&lt;0.001</b> | -0.685  | 0.00 | 2        | <0.001   | <b>&lt;0.001</b> |
| Sex                             | -0.004  | 0.003 | 0.93     | 0.98             | -0.047  | 0.004 | 0.26     | 0.48             | -0.078  | 0.003 | 0.09             | 0.13             | -0.034  | 0.00 | 5        | 0.43     | 0.65             |
| <b>Optic Radiation</b>          |         |       |          |                  |         |       |          |                  |         |       |                  |                  |         |      |          |          |                  |
| IL-6                            | -0.102  | 0.002 | 0.04     | 0.11             | -0.048  | 0.003 | 0.30     | 0.39             | -0.138  | 0.003 | 0.01             | <b>0.03</b>      | -0.006  | 0.00 | 3        | 0.89     | 0.98             |
| GA at delivery                  | 0.001   | 0.001 | 0.98     | 0.98             | -0.095  | 0.002 | 0.06     | 0.20             | -0.115  | 0.002 | 0.05             | 0.22             | -0.076  | 0.00 | 2        | 0.12     | 0.22             |
| PMA at scan                     | 0.542   | 0.001 | <0.001   | <b>&lt;0.001</b> | -0.562  | 0.002 | <0.001   | <b>&lt;0.001</b> | -0.292  | 0.002 | <0.001           | <b>&lt;0.001</b> | -0.601  | 0.00 | 2        | <0.001   | <b>&lt;0.001</b> |
| Sex                             | -0.001  | 0.003 | 0.98     | 0.98             | -0.114  | 0.005 | 0.01     | 0.05             | -0.173  | 0.005 | <0.01            | <b>0.01</b>      | -0.086  | 0.00 | 5        | 0.06     | 0.25             |

| Uncinate Fasciculus                  |        |       |        |                  |        |       |        |                  |        |       |        |                  |        |      |   |        |                  |
|--------------------------------------|--------|-------|--------|------------------|--------|-------|--------|------------------|--------|-------|--------|------------------|--------|------|---|--------|------------------|
| IL-6                                 | -0.122 | 0.001 | 0.01   | 0.06             | -0.140 | 0.002 | <0.01  | <b>0.04</b>      | -0.234 | 0.003 | <0.001 | <b>&lt;0.001</b> | -0.078 | 0.00 | 2 | 0.10   | 0.22             |
| GA at delivery                       | 0.088  | 0.001 | 0.10   | 0.18             | 0.052  | 0.002 | 0.33   | 0.42             | 0.129  | 0.002 | 0.03   | 0.22             | 0.005  | 0.00 | 2 | 0.92   | 1.00             |
| PMA at scan                          | 0.494  | 0.001 | <0.001 | <b>&lt;0.001</b> | -0.548 | 0.001 | <0.001 | <b>&lt;0.001</b> | -0.269 | 0.002 | <0.001 | <b>&lt;0.001</b> | -0.600 | 0.00 | 2 | <0.001 | <b>&lt;0.001</b> |
| Sex                                  | -0.063 | 0.002 | 0.19   | 0.43             | -0.074 | 0.004 | 0.13   | 0.29             | -0.129 | 0.005 | 0.02   | <b>0.04</b>      | -0.040 | 0.00 | 4 | 0.39   | 0.65             |
| Inferior Fronto-Occipital Fasciculus |        |       |        |                  |        |       |        |                  |        |       |        |                  |        |      |   |        |                  |
| IL-6                                 | -0.033 | 0.002 | 0.45   | 0.58             | -0.059 | 0.003 | 0.18   | 0.28             | -0.130 | 0.002 | 0.01   | <b>0.03</b>      | -0.032 | 0.00 | 3 | 0.46   | 0.59             |
| GA at delivery                       | 0.126  | 0.001 | 0.01   | 0.06             | -0.086 | 0.002 | 0.07   | 0.20             | 0.000  | 0.001 | 1.00   | 1.00             | -0.103 | 0.00 | 2 | 0.03   | 0.08             |
| PMA at scan                          | 0.601  | 0.001 | <0.001 | <b>&lt;0.001</b> | -0.633 | 0.002 | <0.001 | <b>&lt;0.001</b> | -0.429 | 0.001 | <0.001 | <b>&lt;0.001</b> | -0.642 | 0.00 | 2 | <0.001 | <b>&lt;0.001</b> |
| Sex                                  | -0.005 | 0.003 | 0.90   | 0.98             | -0.103 | 0.004 | 0.02   | 0.05             | -0.173 | 0.004 | <0.01  | <b>0.01</b>      | -0.070 | 0.00 | 5 | 0.09   | 0.28             |
| Anterior Limb of Internal Capsule    |        |       |        |                  |        |       |        |                  |        |       |        |                  |        |      |   |        |                  |
| IL-6                                 | 0.001  | 0.001 | 0.97   | 0.97             | -0.096 | 0.003 | 0.04   | 0.18             | -0.137 | 0.003 | 0.01   | <b>0.03</b>      | -0.078 | 0.00 | 4 | 0.08   | 0.22             |
| GA at delivery                       | 0.110  | 0.001 | 0.02   | 0.07             | -0.105 | 0.002 | 0.04   | 0.20             | -0.054 | 0.002 | 0.34   | 0.62             | -0.114 | 0.00 | 2 | 0.02   | 0.08             |
| PMA at scan                          | 0.598  | 0.001 | <0.001 | <b>&lt;0.001</b> | -0.564 | 0.002 | <0.001 | <b>&lt;0.001</b> | -0.416 | 0.002 | <0.001 | <b>&lt;0.001</b> | -0.590 | 0.00 | 2 | <0.001 | <b>&lt;0.001</b> |
| Sex                                  | -0.030 | 0.002 | 0.49   | 0.89             | -0.031 | 0.005 | 0.49   | 0.55             | -0.051 | 0.005 | 0.33   | 0.33             | -0.020 | 0.00 | 6 | 0.66   | 0.85             |
| Inferior Cingulum Bundle             |        |       |        |                  |        |       |        |                  |        |       |        |                  |        |      |   |        |                  |
| IL-6                                 | -0.105 | 0.001 | 0.05   | 0.12             | -0.042 | 0.001 | 0.37   | 0.42             | -0.113 | 0.002 | 0.04   | 0.06             | -0.001 | 0.00 | 2 | 0.98   | 0.98             |
| GA at delivery                       | -0.146 | 0.001 | 0.01   | 0.06             | 0.079  | 0.001 | 0.13   | 0.28             | -0.044 | 0.001 | 0.46   | 0.69             | 0.125  | 0.00 | 1 | 0.01   | 0.08             |
| PMA at scan                          | 0.422  | 0.001 | <0.001 | <b>&lt;0.001</b> | -0.600 | 0.001 | <0.001 | <b>&lt;0.001</b> | -0.309 | 0.001 | <0.001 | <b>&lt;0.001</b> | -0.629 | 0.00 | 1 | <0.001 | <b>&lt;0.001</b> |
| Sex                                  | 0.012  | 0.002 | 0.82   | 0.98             | -0.123 | 0.003 | 0.01   | 0.05             | -0.104 | 0.003 | 0.05   | 0.10             | -0.111 | 0.00 | 3 | 0.02   | 0.15             |
| Fornix                               |        |       |        |                  |        |       |        |                  |        |       |        |                  |        |      |   |        |                  |
| IL-6                                 | 0.004  | 0.001 | 0.94   | 0.97             | -0.079 | 0.002 | 0.08   | 0.24             | -0.074 | 0.002 | 0.15   | 0.16             | -0.070 | 0.00 | 2 | 0.13   | 0.23             |
| GA at delivery                       | 0.001  | 0.001 | 0.98   | 0.98             | 0.004  | 0.001 | 0.93   | 0.93             | 0.016  | 0.001 | 0.77   | 0.91             | 0.000  | 0.00 | 1 | 1.00   | 1.00             |
| PMA at scan                          | 0.354  | 0.001 | <0.001 | <b>&lt;0.001</b> | -0.629 | 0.001 | <0.001 | <b>&lt;0.001</b> | -0.498 | 0.001 | <0.001 | <b>&lt;0.001</b> | -0.634 | 0.00 | 1 | <0.001 | <b>&lt;0.001</b> |
| Sex                                  | -0.083 | 0.002 | 0.12   | 0.42             | -0.032 | 0.003 | 0.47   | 0.55             | -0.076 | 0.004 | 0.13   | 0.17             | -0.001 | 0.00 | 3 | 0.98   | 0.98             |

**IL-8**

FA

MD

AD

RD

|                                             | $\beta$ | SE    | $p$    | $q$              | $\beta$ | SE    | $p$    | $q$              | $\beta$ | SE    | $p$    | $q$              | $\beta$ | SE    | $p$    | $q$              |
|---------------------------------------------|---------|-------|--------|------------------|---------|-------|--------|------------------|---------|-------|--------|------------------|---------|-------|--------|------------------|
| <b>Corpus Callosum</b>                      |         |       |        |                  |         |       |        |                  |         |       |        |                  |         |       |        |                  |
| IL-8                                        | -0.045  | 0.002 | 0.37   | 0.83             | -0.003  | 0.002 | 0.95   | 0.95             | -0.052  | 0.002 | 0.36   | 0.99             | 0.025   | 0.002 | 0.61   | 0.89             |
| GA at delivery                              | 0.048   | 0.001 | 0.38   | 0.56             | 0.034   | 0.001 | 0.51   | 0.62             | 0.095   | 0.001 | 0.13   | 0.38             | 0.008   | 0.002 | 0.88   | 0.88             |
| PMA at scan                                 | 0.463   | 0.001 | <0.001 | <b>&lt;0.001</b> | -0.563  | 0.001 | <0.001 | <b>&lt;0.001</b> | -0.204  | 0.001 | <0.01  | <b>&lt;0.01</b>  | -0.556  | 0.002 | <0.001 | <b>&lt;0.001</b> |
| Sex                                         | -0.075  | 0.003 | 0.13   | 0.40             | -0.020  | 0.003 | 0.67   | 0.67             | -0.094  | 0.003 | 0.10   | 0.11             | 0.032   | 0.004 | 0.51   | 0.71             |
| <b>Superior Cingulum Bundle</b>             |         |       |        |                  |         |       |        |                  |         |       |        |                  |         |       |        |                  |
| IL-8                                        | -0.015  | 0.002 | 0.79   | 0.86             | 0.024   | 0.003 | 0.63   | 0.95             | 0.015   | 0.003 | 0.77   | 0.99             | 0.027   | 0.003 | 0.59   | 0.89             |
| GA at delivery                              | 0.103   | 0.001 | 0.08   | 0.14             | -0.031  | 0.002 | 0.57   | 0.62             | 0.030   | 0.002 | 0.60   | 0.77             | -0.057  | 0.002 | 0.30   | 0.53             |
| PMA at scan                                 | 0.305   | 0.001 | <0.001 | <b>&lt;0.001</b> | -0.488  | 0.002 | <0.001 | <b>&lt;0.001</b> | -0.392  | 0.002 | <0.001 | <b>&lt;0.001</b> | -0.464  | 0.002 | <0.001 | <b>&lt;0.001</b> |
| Sex                                         | -0.089  | 0.003 | 0.10   | 0.40             | -0.053  | 0.004 | 0.29   | 0.44             | -0.140  | 0.005 | 0.01   | <b>0.02</b>      | -0.006  | 0.005 | 0.90   | 1.00             |
| <b>Corticospinal Tract</b>                  |         |       |        |                  |         |       |        |                  |         |       |        |                  |         |       |        |                  |
| IL-8                                        | -0.059  | 0.002 | 0.22   | 0.83             | 0.044   | 0.002 | 0.30   | 0.95             | -0.001  | 0.002 | 0.98   | 0.99             | 0.054   | 0.003 | 0.21   | 0.89             |
| GA at delivery                              | 0.010   | 0.001 | 0.85   | 0.88             | 0.056   | 0.002 | 0.21   | 0.32             | 0.088   | 0.001 | 0.08   | 0.36             | 0.038   | 0.002 | 0.41   | 0.61             |
| PMA at scan                                 | 0.541   | 0.001 | <0.001 | <b>&lt;0.001</b> | -0.699  | 0.002 | <0.001 | <b>&lt;0.001</b> | -0.621  | 0.001 | <0.001 | <b>&lt;0.001</b> | -0.677  | 0.002 | <0.001 | <b>&lt;0.001</b> |
| Sex                                         | -0.007  | 0.003 | 0.88   | 0.99             | -0.054  | 0.004 | 0.20   | 0.36             | -0.093  | 0.003 | 0.04   | 0.07             | -0.038  | 0.005 | 0.37   | 0.67             |
| <b>Optic Radiation</b>                      |         |       |        |                  |         |       |        |                  |         |       |        |                  |         |       |        |                  |
| IL-8                                        | -0.010  | 0.002 | 0.84   | 0.86             | 0.038   | 0.003 | 0.40   | 0.95             | 0.024   | 0.003 | 0.65   | 0.99             | 0.032   | 0.003 | 0.47   | 0.89             |
| GA at delivery                              | 0.018   | 0.001 | 0.73   | 0.88             | -0.073  | 0.002 | 0.14   | 0.29             | -0.073  | 0.002 | 0.21   | 0.47             | -0.064  | 0.002 | 0.19   | 0.42             |
| PMA at scan                                 | 0.539   | 0.001 | <0.001 | <b>&lt;0.001</b> | -0.557  | 0.002 | <0.001 | <b>&lt;0.001</b> | -0.289  | 0.002 | <0.001 | <b>&lt;0.001</b> | -0.597  | 0.002 | <0.001 | <b>&lt;0.001</b> |
| Sex                                         | 0.000   | 0.003 | 0.99   | 0.99             | -0.124  | 0.005 | 0.01   | <b>0.03</b>      | -0.185  | 0.005 | <0.01  | <b>&lt;0.01</b>  | -0.093  | 0.005 | 0.04   | 0.17             |
| <b>Uncinate Fasciculus</b>                  |         |       |        |                  |         |       |        |                  |         |       |        |                  |         |       |        |                  |
| IL-8                                        | 0.063   | 0.001 | 0.20   | 0.83             | -0.055  | 0.002 | 0.26   | 0.95             | -0.020  | 0.003 | 0.72   | 0.99             | -0.064  | 0.002 | 0.17   | 0.89             |
| GA at delivery                              | 0.114   | 0.001 | 0.03   | 0.07             | 0.083   | 0.002 | 0.12   | 0.29             | 0.180   | 0.002 | <0.01  | <b>0.03</b>      | 0.022   | 0.002 | 0.66   | 0.84             |
| PMA at scan                                 | 0.490   | 0.001 | <0.001 | <b>&lt;0.001</b> | -0.551  | 0.001 | <0.001 | <b>&lt;0.001</b> | -0.275  | 0.002 | <0.001 | <b>&lt;0.001</b> | -0.602  | 0.002 | <0.001 | <b>&lt;0.001</b> |
| Sex                                         | -0.061  | 0.002 | 0.21   | 0.46             | -0.085  | 0.004 | 0.08   | 0.19             | -0.140  | 0.005 | 0.01   | <b>0.03</b>      | -0.049  | 0.004 | 0.29   | 0.65             |
| <b>Inferior Fronto-Occipital Fasciculus</b> |         |       |        |                  |         |       |        |                  |         |       |        |                  |         |       |        |                  |
| IL-8                                        | 0.008   | 0.002 | 0.86   | 0.86             | 0.003   | 0.003 | 0.94   | 0.95             | 0.015   | 0.002 | 0.76   | 0.99             | -0.001  | 0.003 | 0.98   | 1.00             |
| GA at delivery                              | 0.127   | 0.001 | 0.01   | 0.07             | -0.065  | 0.002 | 0.16   | 0.29             | 0.036   | 0.001 | 0.52   | 0.77             | -0.088  | 0.002 | 0.05   | 0.18             |
| PMA at scan                                 | 0.599   | 0.001 | <0.001 | <b>&lt;0.001</b> | -0.632  | 0.002 | <0.001 | <b>&lt;0.001</b> | -0.430  | 0.001 | <0.001 | <b>&lt;0.001</b> | -0.641  | 0.002 | <0.001 | <b>&lt;0.001</b> |
| Sex                                         | 0.001   | 0.003 | 0.99   | 0.99             | -0.112  | 0.004 | 0.01   | <b>0.03</b>      | -0.184  | 0.004 | <0.001 | <b>&lt;0.01</b>  | -0.079  | 0.005 | 0.06   | 0.18             |
| <b>Anterior Limb of Internal Capsule</b>    |         |       |        |                  |         |       |        |                  |         |       |        |                  |         |       |        |                  |
| IL-8                                        | -0.045  | 0.001 | 0.30   | 0.83             | 0.004   | 0.003 | 0.92   | 0.95             | -0.052  | 0.003 | 0.32   | 0.99             | 0.018   | 0.004 | 0.69   | 0.89             |
| GA at delivery                              | 0.106   | 0.001 | 0.03   | 0.07             | -0.078  | 0.002 | 0.12   | 0.29             | -0.019  | 0.002 | 0.73   | 0.79             | -0.091  | 0.002 | 0.06   | 0.18             |
| PMA at scan                                 | 0.595   | 0.001 | <0.001 | <b>&lt;0.001</b> | -0.566  | 0.002 | <0.001 | <b>&lt;0.001</b> | -0.420  | 0.002 | <0.001 | <b>&lt;0.001</b> | -0.591  | 0.002 | <0.001 | <b>&lt;0.001</b> |
| Sex                                         | -0.031  | 0.002 | 0.48   | 0.86             | -0.040  | 0.005 | 0.38   | 0.48             | -0.065  | 0.005 | 0.21   | 0.21             | -0.027  | 0.006 | 0.55   | 0.71             |
| <b>Inferior Cingulum Bundle</b>             |         |       |        |                  |         |       |        |                  |         |       |        |                  |         |       |        |                  |
| IL-8                                        | -0.030  | 0.001 | 0.58   | 0.86             | -0.015  | 0.001 | 0.74   | 0.95             | -0.042  | 0.002 | 0.44   | 0.99             | 0.000   | 0.002 | 1.00   | 1.00             |
| GA at delivery                              | -0.125  | 0.001 | 0.03   | 0.07             | 0.093   | 0.001 | 0.07   | 0.29             | -0.015  | 0.001 | 0.79   | 0.79             | 0.130   | 0.001 | 0.01   | 0.09             |
| PMA at scan                                 | 0.418   | 0.001 | <0.001 | <b>&lt;0.001</b> | -0.601  | 0.001 | <0.001 | <b>&lt;0.001</b> | -0.313  | 0.001 | <0.001 | <b>&lt;0.001</b> | -0.630  | 0.001 | <0.001 | <b>&lt;0.001</b> |
| Sex                                         | 0.007   | 0.002 | 0.90   | 0.99             | -0.131  | 0.003 | 0.01   | <b>0.03</b>      | -0.117  | 0.003 | 0.03   | 0.06             | -0.115  | 0.003 | 0.01   | 0.12             |
| <b>Fornix</b>                               |         |       |        |                  |         |       |        |                  |         |       |        |                  |         |       |        |                  |
| IL-8                                        | -0.030  | 0.001 | 0.57   | 0.86             | 0.023   | 0.002 | 0.61   | 0.95             | 0.000   | 0.002 | 0.99   | 0.99             | 0.033   | 0.002 | 0.47   | 0.89             |

|                |        |       |        |                  |        |       |        |                  |        |       |        |                  |        |       |        |                  |
|----------------|--------|-------|--------|------------------|--------|-------|--------|------------------|--------|-------|--------|------------------|--------|-------|--------|------------------|
| GA at delivery | 0.009  | 0.001 | 0.88   | 0.88             | 0.024  | 0.001 | 0.62   | 0.62             | 0.040  | 0.001 | 0.46   | 0.77             | 0.015  | 0.001 | 0.76   | 0.86             |
| PMA at scan    | 0.347  | 0.001 | <0.001 | <b>&lt;0.001</b> | -0.631 | 0.001 | <0.001 | <b>&lt;0.001</b> | -0.497 | 0.001 | <0.001 | <b>&lt;0.001</b> | -0.635 | 0.001 | <0.001 | <b>&lt;0.001</b> |
| Sex            | -0.094 | 0.002 | 0.08   | 0.40             | -0.036 | 0.003 | 0.43   | 0.48             | -0.087 | 0.004 | 0.09   | 0.11             | 0.000  | 0.003 | 1.00   | 1.00             |

### IL-10

|                                             | FA      |       |          |                  | MD      |       |          |                  | AD      |       |          |                  | RD      |       |          |                  |
|---------------------------------------------|---------|-------|----------|------------------|---------|-------|----------|------------------|---------|-------|----------|------------------|---------|-------|----------|------------------|
|                                             | $\beta$ | SE    | <i>p</i> | <i>q</i>         | $\beta$ | SE    | <i>p</i> | <i>q</i>         | $\beta$ | SE    | <i>p</i> | <i>q</i>         | $\beta$ | SE    | <i>p</i> | <i>q</i>         |
| <b>Corpus Callosum</b>                      |         |       |          |                  |         |       |          |                  |         |       |          |                  |         |       |          |                  |
| IL-10                                       | -0.081  | 0.002 | 0.11     | 0.16             | 0.075   | 0.002 | 0.12     | 0.22             | -0.024  | 0.002 | 0.68     | 0.73             | 0.082   | 0.002 | 0.08     | 0.18             |
| GA at delivery                              | 0.054   | 0.001 | 0.32     | 0.48             | 0.035   | 0.001 | 0.50     | 0.63             | 0.099   | 0.001 | 0.11     | 0.34             | 0.010   | 0.002 | 0.84     | 0.84             |
| PMA at scan                                 | 0.471   | 0.001 | <0.001   | <b>&lt;0.001</b> | -0.565  | 0.001 | <0.001   | <b>&lt;0.001</b> | -0.197  | 0.001 | <0.01    | <b>&lt;0.01</b>  | -0.568  | 0.002 | <0.001   | <b>&lt;0.001</b> |
| Sex                                         | -0.079  | 0.003 | 0.11     | 0.35             | -0.013  | 0.003 | 0.79     | 0.79             | -0.087  | 0.003 | 0.13     | 0.14             | 0.034   | 0.004 | 0.48     | 0.68             |
| <b>Superior Cingulum Bundle</b>             |         |       |          |                  |         |       |          |                  |         |       |          |                  |         |       |          |                  |
| IL-10                                       | -0.035  | 0.002 | 0.51     | 0.51             | 0.055   | 0.003 | 0.27     | 0.36             | 0.054   | 0.003 | 0.31     | 0.70             | 0.052   | 0.003 | 0.31     | 0.40             |
| GA at delivery                              | 0.102   | 0.001 | 0.08     | 0.15             | -0.028  | 0.002 | 0.60     | 0.63             | 0.033   | 0.002 | 0.56     | 0.73             | -0.052  | 0.002 | 0.35     | 0.52             |
| PMA at scan                                 | 0.305   | 0.001 | <0.001   | <b>&lt;0.001</b> | -0.485  | 0.002 | <0.001   | <b>&lt;0.001</b> | -0.387  | 0.002 | <0.001   | <b>&lt;0.001</b> | -0.463  | 0.002 | <0.001   | <b>&lt;0.001</b> |
| Sex                                         | -0.085  | 0.003 | 0.12     | 0.35             | -0.059  | 0.004 | 0.24     | 0.36             | -0.143  | 0.005 | 0.01     | <b>0.02</b>      | -0.015  | 0.005 | 0.77     | 0.87             |
| <b>Corticospinal Tract</b>                  |         |       |          |                  |         |       |          |                  |         |       |          |                  |         |       |          |                  |
| IL-10                                       | -0.219  | 0.002 | <0.001   | <b>&lt;0.001</b> | 0.153   | 0.002 | <0.001   | <b>&lt;0.01</b>  | 0.022   | 0.002 | 0.64     | 0.73             | 0.181   | 0.003 | <0.001   | <b>&lt;0.001</b> |
| GA at delivery                              | -0.001  | 0.001 | 0.99     | 0.99             | 0.064   | 0.002 | 0.15     | 0.27             | 0.089   | 0.001 | 0.08     | 0.34             | 0.049   | 0.002 | 0.28     | 0.51             |
| PMA at scan                                 | 0.533   | 0.001 | <0.001   | <b>&lt;0.001</b> | -0.693  | 0.001 | <0.001   | <b>&lt;0.001</b> | -0.619  | 0.001 | <0.001   | <b>&lt;0.001</b> | -0.670  | 0.002 | <0.001   | <b>&lt;0.001</b> |
| Sex                                         | -0.003  | 0.003 | 0.94     | 0.94             | -0.054  | 0.004 | 0.20     | 0.35             | -0.089  | 0.003 | 0.06     | 0.09             | -0.040  | 0.005 | 0.34     | 0.61             |
| <b>Optic Radiation</b>                      |         |       |          |                  |         |       |          |                  |         |       |          |                  |         |       |          |                  |
| IL-10                                       | -0.099  | 0.002 | 0.04     | 0.08             | 0.094   | 0.003 | 0.04     | 0.09             | 0.044   | 0.003 | 0.41     | 0.73             | 0.104   | 0.003 | 0.02     | 0.06             |
| GA at delivery                              | 0.016   | 0.001 | 0.76     | 0.85             | -0.070  | 0.002 | 0.16     | 0.27             | -0.070  | 0.002 | 0.23     | 0.51             | -0.058  | 0.002 | 0.23     | 0.51             |
| PMA at scan                                 | 0.538   | 0.001 | <0.001   | <b>&lt;0.001</b> | -0.557  | 0.002 | <0.001   | <b>&lt;0.001</b> | -0.288  | 0.002 | <0.001   | <b>&lt;0.001</b> | -0.598  | 0.002 | <0.001   | <b>&lt;0.001</b> |
| Sex                                         | -0.004  | 0.003 | 0.93     | 0.94             | -0.122  | 0.005 | 0.01     | <b>0.03</b>      | -0.186  | 0.005 | <0.01    | <b>&lt;0.01</b>  | -0.094  | 0.005 | 0.04     | 0.16             |
| <b>Uncinate Fasciculus</b>                  |         |       |          |                  |         |       |          |                  |         |       |          |                  |         |       |          |                  |
| IL-10                                       | -0.051  | 0.001 | 0.30     | 0.33             | -0.103  | 0.002 | 0.04     | 0.09             | -0.151  | 0.003 | 0.01     | 0.05             | -0.068  | 0.003 | 0.14     | 0.22             |
| GA at delivery                              | 0.104   | 0.001 | 0.05     | 0.11             | 0.085   | 0.002 | 0.11     | 0.27             | 0.174   | 0.002 | <0.01    | <b>0.03</b>      | 0.030   | 0.002 | 0.56     | 0.72             |
| PMA at scan                                 | 0.482   | 0.001 | <0.001   | <b>&lt;0.001</b> | -0.548  | 0.001 | <0.001   | <b>&lt;0.001</b> | -0.275  | 0.002 | <0.001   | <b>&lt;0.001</b> | -0.601  | 0.002 | <0.001   | <b>&lt;0.001</b> |
| Sex                                         | -0.055  | 0.002 | 0.26     | 0.59             | -0.093  | 0.004 | 0.06     | 0.13             | -0.144  | 0.005 | 0.01     | <b>0.02</b>      | -0.060  | 0.004 | 0.20     | 0.44             |
| <b>Inferior Fronto-Occipital Fasciculus</b> |         |       |          |                  |         |       |          |                  |         |       |          |                  |         |       |          |                  |
| IL-10                                       | -0.110  | 0.002 | 0.01     | <b>0.03</b>      | 0.046   | 0.003 | 0.28     | 0.36             | -0.032  | 0.002 | 0.54     | 0.73             | 0.069   | 0.003 | 0.10     | 0.18             |
| GA at delivery                              | 0.122   | 0.001 | 0.01     | 0.08             | -0.063  | 0.002 | 0.18     | 0.27             | 0.036   | 0.001 | 0.51     | 0.73             | -0.082  | 0.002 | 0.07     | 0.21             |
| PMA at scan                                 | 0.598   | 0.001 | <0.001   | <b>&lt;0.001</b> | -0.630  | 0.002 | <0.001   | <b>&lt;0.001</b> | -0.426  | 0.001 | <0.001   | <b>&lt;0.001</b> | -0.641  | 0.002 | <0.001   | <b>&lt;0.001</b> |
| Sex                                         | -0.003  | 0.003 | 0.94     | 0.94             | -0.113  | 0.004 | 0.01     | <b>0.03</b>      | -0.190  | 0.004 | <0.001   | <b>&lt;0.01</b>  | -0.080  | 0.005 | 0.06     | 0.17             |
| <b>Anterior Limb of Internal Capsule</b>    |         |       |          |                  |         |       |          |                  |         |       |          |                  |         |       |          |                  |
| IL-10                                       | -0.088  | 0.001 | 0.05     | 0.08             | -0.002  | 0.003 | 0.97     | 0.97             | -0.073  | 0.003 | 0.16     | 0.48             | 0.020   | 0.004 | 0.66     | 0.74             |
| GA at delivery                              | 0.105   | 0.001 | 0.03     | 0.08             | -0.078  | 0.002 | 0.12     | 0.27             | -0.019  | 0.002 | 0.73     | 0.80             | -0.090  | 0.002 | 0.07     | 0.21             |
| PMA at scan                                 | 0.594   | 0.001 | <0.001   | <b>&lt;0.001</b> | -0.565  | 0.002 | <0.001   | <b>&lt;0.001</b> | -0.418  | 0.002 | <0.001   | <b>&lt;0.001</b> | -0.591  | 0.002 | <0.001   | <b>&lt;0.001</b> |
| Sex                                         | -0.031  | 0.002 | 0.48     | 0.86             | -0.041  | 0.006 | 0.38     | 0.48             | -0.065  | 0.005 | 0.22     | 0.22             | -0.028  | 0.006 | 0.53     | 0.68             |
| <b>Inferior Cingulum Bundle</b>             |         |       |          |                  |         |       |          |                  |         |       |          |                  |         |       |          |                  |
| IL-10                                       | -0.137  | 0.001 | 0.01     | <b>0.03</b>      | 0.108   | 0.002 | 0.02     | 0.09             | 0.019   | 0.002 | 0.73     | 0.73             | 0.133   | 0.002 | 0.00     | <b>0.02</b>      |

|                                             |                           |           |          |                  |                           |           |          |                  |                           |           |          |                  |                           |           |          |                  |
|---------------------------------------------|---------------------------|-----------|----------|------------------|---------------------------|-----------|----------|------------------|---------------------------|-----------|----------|------------------|---------------------------|-----------|----------|------------------|
| GA at delivery                              | -0.136                    | 0.001     | 0.02     | 0.08             | 0.100                     | 0.001     | 0.05     | 0.27             | -0.015                    | 0.001     | 0.80     | 0.80             | 0.140                     | 0.001     | 0.01     | 0.05             |
| PMA at scan                                 | 0.409                     | 0.001     | <0.001   | <b>&lt;0.001</b> | -0.593                    | 0.001     | <0.001   | <b>&lt;0.001</b> | -0.312                    | 0.001     | <0.001   | <b>&lt;0.001</b> | -0.621                    | 0.001     | <0.001   | <b>&lt;0.001</b> |
| Sex                                         | 0.015                     | 0.002     | 0.78     | 0.94             | -0.134                    | 0.003     | <0.01    | <b>0.03</b>      | -0.114                    | 0.003     | 0.04     | 0.07             | -0.122                    | 0.003     | 0.01     | 0.07             |
| <b>Fornix</b>                               |                           |           |          |                  |                           |           |          |                  |                           |           |          |                  |                           |           |          |                  |
| IL-10                                       | 0.082                     | 0.001     | 0.13     | 0.17             | 0.039                     | 0.002     | 0.39     | 0.44             | 0.100                     | 0.002     | 0.05     | 0.21             | 0.002                     | 0.002     | 0.97     | 0.97             |
| GA at delivery                              | 0.019                     | 0.001     | 0.74     | 0.85             | 0.024                     | 0.001     | 0.63     | 0.63             | 0.046                     | 0.001     | 0.39     | 0.71             | 0.015                     | 0.001     | 0.76     | 0.84             |
| PMA at scan                                 | 0.353                     | 0.001     | <0.001   | <b>&lt;0.001</b> | -0.631                    | 0.001     | <0.001   | <b>&lt;0.001</b> | -0.494                    | 0.001     | <0.001   | <b>&lt;0.001</b> | -0.641                    | 0.001     | <0.001   | <b>&lt;0.001</b> |
| Sex                                         | -0.088                    | 0.002     | 0.10     | 0.35             | -0.034                    | 0.003     | 0.45     | 0.51             | -0.081                    | 0.004     | 0.11     | 0.14             | -0.004                    | 0.003     | 0.92     | 0.92             |
| <b>TNF-<math>\alpha</math></b>              |                           |           |          |                  |                           |           |          |                  |                           |           |          |                  |                           |           |          |                  |
| <b>FA</b>                                   |                           |           |          |                  |                           |           |          |                  |                           |           |          |                  |                           |           |          |                  |
|                                             | <b><math>\beta</math></b> | <b>SE</b> | <b>p</b> | <b>q</b>         | <b>MD</b>                 |           |          |                  | <b>AD</b>                 |           |          |                  | <b>RD</b>                 |           |          |                  |
|                                             | <b><math>\beta</math></b> | <b>SE</b> | <b>p</b> | <b>q</b>         | <b><math>\beta</math></b> | <b>SE</b> | <b>p</b> | <b>q</b>         | <b><math>\beta</math></b> | <b>SE</b> | <b>p</b> | <b>q</b>         | <b><math>\beta</math></b> | <b>SE</b> | <b>p</b> | <b>q</b>         |
| <b>Corpus Callosum</b>                      |                           |           |          |                  |                           |           |          |                  |                           |           |          |                  |                           |           |          |                  |
| TNF- $\alpha$                               | -0.015                    | 0.002     | 0.77     | 0.96             | -0.046                    | 0.002     | 0.35     | 0.78             | -0.072                    | 0.002     | 0.21     | 0.47             | -0.024                    | 0.003     | 0.62     | 0.88             |
| GA at delivery                              | 0.053                     | 0.001     | 0.33     | 0.50             | 0.026                     | 0.001     | 0.61     | 0.69             | 0.090                     | 0.001     | 0.15     | 0.40             | 0.000                     | 0.002     | 1.00     | 1.00             |
| PMA at scan                                 | 0.468                     | 0.001     | <0.001   | <b>&lt;0.001</b> | -0.561                    | 0.001     | <0.001   | <b>&lt;0.001</b> | -0.200                    | 0.001     | <0.01    | <b>&lt;0.01</b>  | -0.557                    | 0.002     | <0.001   | <b>&lt;0.001</b> |
| Sex                                         | -0.079                    | 0.003     | 0.12     | 0.34             | -0.020                    | 0.003     | 0.67     | 0.67             | -0.100                    | 0.003     | 0.08     | 0.10             | 0.034                     | 0.004     | 0.49     | 0.68             |
| <b>Superior Cingulum Bundle</b>             |                           |           |          |                  |                           |           |          |                  |                           |           |          |                  |                           |           |          |                  |
| TNF- $\alpha$                               | 0.008                     | 0.002     | 0.89     | 0.96             | 0.014                     | 0.003     | 0.78     | 0.78             | 0.035                     | 0.003     | 0.51     | 0.77             | 0.006                     | 0.003     | 0.91     | 0.91             |
| GA at delivery                              | 0.106                     | 0.001     | 0.07     | 0.13             | -0.034                    | 0.002     | 0.53     | 0.68             | 0.030                     | 0.002     | 0.60     | 0.70             | -0.060                    | 0.002     | 0.27     | 0.48             |
| PMA at scan                                 | 0.305                     | 0.001     | <0.001   | <b>&lt;0.001</b> | -0.491                    | 0.002     | <0.001   | <b>&lt;0.001</b> | -0.395                    | 0.002     | <0.001   | <b>&lt;0.001</b> | -0.466                    | 0.002     | <0.001   | <b>&lt;0.001</b> |
| Sex                                         | -0.092                    | 0.003     | 0.09     | 0.34             | -0.048                    | 0.004     | 0.34     | 0.48             | -0.136                    | 0.005     | 0.01     | <b>0.02</b>      | -0.001                    | 0.005     | 0.98     | 0.98             |
| <b>Corticospinal Tract</b>                  |                           |           |          |                  |                           |           |          |                  |                           |           |          |                  |                           |           |          |                  |
| TNF- $\alpha$                               | -0.043                    | 0.002     | 0.37     | 0.96             | 0.020                     | 0.003     | 0.64     | 0.78             | -0.022                    | 0.002     | 0.64     | 0.82             | 0.029                     | 0.003     | 0.50     | 0.88             |
| GA at delivery                              | 0.008                     | 0.001     | 0.88     | 0.90             | 0.055                     | 0.002     | 0.23     | 0.35             | 0.082                     | 0.001     | 0.10     | 0.40             | 0.038                     | 0.002     | 0.42     | 0.62             |
| PMA at scan                                 | 0.546                     | 0.001     | <0.001   | <b>&lt;0.001</b> | -0.703                    | 0.002     | <0.001   | <b>&lt;0.001</b> | -0.621                    | 0.001     | <0.001   | <b>&lt;0.001</b> | -0.681                    | 0.002     | <0.001   | <b>&lt;0.001</b> |
| Sex                                         | -0.010                    | 0.003     | 0.83     | 0.97             | -0.053                    | 0.004     | 0.21     | 0.38             | -0.094                    | 0.003     | 0.04     | 0.06             | -0.036                    | 0.005     | 0.40     | 0.68             |
| <b>Optic Radiation</b>                      |                           |           |          |                  |                           |           |          |                  |                           |           |          |                  |                           |           |          |                  |
| TNF- $\alpha$                               | -0.028                    | 0.002     | 0.56     | 0.96             | 0.013                     | 0.003     | 0.77     | 0.78             | 0.002                     | 0.003     | 0.97     | 0.97             | 0.020                     | 0.003     | 0.66     | 0.88             |
| GA at delivery                              | 0.016                     | 0.001     | 0.76     | 0.90             | -0.077                    | 0.002     | 0.12     | 0.26             | -0.078                    | 0.002     | 0.18     | 0.40             | -0.067                    | 0.002     | 0.17     | 0.38             |
| PMA at scan                                 | 0.540                     | 0.001     | <0.001   | <b>&lt;0.001</b> | -0.563                    | 0.002     | <0.001   | <b>&lt;0.001</b> | -0.295                    | 0.002     | <0.001   | <b>&lt;0.001</b> | -0.601                    | 0.002     | <0.001   | <b>&lt;0.001</b> |
| Sex                                         | -0.004                    | 0.003     | 0.94     | 0.97             | -0.128                    | 0.005     | 0.01     | <b>0.03</b>      | -0.194                    | 0.005     | <0.001   | <b>&lt;0.01</b>  | -0.096                    | 0.005     | 0.03     | 0.15             |
| <b>Uncinate Fasciculus</b>                  |                           |           |          |                  |                           |           |          |                  |                           |           |          |                  |                           |           |          |                  |
| TNF- $\alpha$                               | -0.125                    | 0.002     | 0.01     | 0.09             | -0.039                    | 0.002     | 0.43     | 0.78             | -0.134                    | 0.003     | 0.02     | 0.14             | 0.008                     | 0.003     | 0.86     | 0.91             |
| GA at delivery                              | 0.096                     | 0.001     | 0.07     | 0.13             | 0.084                     | 0.002     | 0.12     | 0.26             | 0.168                     | 0.002     | 0.01     | 0.05             | 0.029                     | 0.002     | 0.57     | 0.73             |
| PMA at scan                                 | 0.491                     | 0.001     | <0.001   | <b>&lt;0.001</b> | -0.544                    | 0.002     | <0.001   | <b>&lt;0.001</b> | -0.266                    | 0.002     | <0.001   | <b>&lt;0.001</b> | -0.597                    | 0.002     | <0.001   | <b>&lt;0.001</b> |
| Sex                                         | -0.070                    | 0.002     | 0.15     | 0.34             | -0.083                    | 0.004     | 0.09     | 0.21             | -0.143                    | 0.005     | 0.01     | <b>0.02</b>      | -0.045                    | 0.004     | 0.34     | 0.68             |
| <b>Inferior Fronto-Occipital Fasciculus</b> |                           |           |          |                  |                           |           |          |                  |                           |           |          |                  |                           |           |          |                  |
| TNF- $\alpha$                               | 0.013                     | 0.002     | 0.76     | 0.96             | -0.015                    | 0.003     | 0.72     | 0.78             | 0.014                     | 0.002     | 0.79     | 0.89             | -0.017                    | 0.003     | 0.69     | 0.88             |
| GA at delivery                              | 0.128                     | 0.001     | 0.01     | 0.06             | -0.069                    | 0.002     | 0.14     | 0.26             | 0.033                     | 0.001     | 0.55     | 0.70             | -0.091                    | 0.002     | 0.05     | 0.15             |
| PMA at scan                                 | 0.597                     | 0.001     | <0.001   | <b>&lt;0.001</b> | -0.631                    | 0.002     | <0.001   | <b>&lt;0.001</b> | -0.433                    | 0.001     | <0.001   | <b>&lt;0.001</b> | -0.640                    | 0.002     | <0.001   | <b>&lt;0.001</b> |
| Sex                                         | -0.002                    | 0.003     | 0.96     | 0.97             | -0.112                    | 0.004     | 0.01     | <b>0.03</b>      | -0.186                    | 0.004     | <0.001   | <b>&lt;0.01</b>  | -0.078                    | 0.006     | 0.07     | 0.20             |
| <b>Anterior Limb of Internal Capsule</b>    |                           |           |          |                  |                           |           |          |                  |                           |           |          |                  |                           |           |          |                  |
| TNF- $\alpha$                               | 0.021                     | 0.002     | 0.64     | 0.96             | -0.062                    | 0.003     | 0.18     | 0.78             | -0.068                    | 0.003     | 0.19     | 0.47             | -0.056                    | 0.004     | 0.21     | 0.63             |



|                                 |        |       |        |                  |        |       |        |                  |        |       |        |                  |        |       |        |                  |
|---------------------------------|--------|-------|--------|------------------|--------|-------|--------|------------------|--------|-------|--------|------------------|--------|-------|--------|------------------|
| GA at delivery                  | 0.113  | 0.001 | 0.02   | 0.06             | -0.087 | 0.002 | 0.08   | 0.26             | -0.026 | 0.002 | 0.65   | 0.70             | -0.100 | 0.002 | 0.04   | 0.15             |
| PMA at scan                     | 0.596  | 0.001 | <0.001 | <b>&lt;0.001</b> | -0.563 | 0.002 | <0.001 | <b>&lt;0.001</b> | -0.416 | 0.002 | <0.001 | <b>&lt;0.001</b> | -0.589 | 0.002 | <0.001 | <b>&lt;0.001</b> |
| Sex                             | -0.027 | 0.002 | 0.53   | 0.96             | -0.041 | 0.005 | 0.37   | 0.48             | -0.063 | 0.005 | 0.23   | 0.23             | -0.028 | 0.006 | 0.53   | 0.68             |
| <b>Inferior Cingulum Bundle</b> |        |       |        |                  |        |       |        |                  |        |       |        |                  |        |       |        |                  |
| TNF- $\alpha$                   | -0.123 | 0.001 | 0.02   | 0.09             | 0.023  | 0.002 | 0.62   | 0.78             | -0.060 | 0.002 | 0.27   | 0.49             | 0.058  | 0.002 | 0.21   | 0.63             |
| GA at delivery                  | -0.139 | 0.001 | 0.02   | 0.06             | 0.094  | 0.001 | 0.07   | 0.26             | -0.022 | 0.001 | 0.70   | 0.70             | 0.135  | 0.001 | 0.01   | 0.07             |
| PMA at scan                     | 0.424  | 0.001 | <0.001 | <b>&lt;0.001</b> | -0.601 | 0.001 | <0.001 | <b>&lt;0.001</b> | -0.312 | 0.001 | <0.001 | <b>&lt;0.001</b> | -0.632 | 0.001 | <0.001 | <b>&lt;0.001</b> |
| Sex                             | -0.002 | 0.002 | 0.97   | 0.97             | -0.130 | 0.003 | 0.01   | <b>0.03</b>      | -0.121 | 0.003 | 0.03   | 0.05             | -0.112 | 0.003 | 0.02   | 0.14             |
| <b>Fornix</b>                   |        |       |        |                  |        |       |        |                  |        |       |        |                  |        |       |        |                  |
| TNF- $\alpha$                   | -0.003 | 0.001 | 0.96   | 0.96             | -0.075 | 0.002 | 0.10   | 0.78             | -0.071 | 0.002 | 0.16   | 0.47             | -0.065 | 0.002 | 0.15   | 0.63             |
| GA at delivery                  | 0.007  | 0.001 | 0.90   | 0.90             | 0.013  | 0.001 | 0.79   | 0.79             | 0.029  | 0.001 | 0.60   | 0.70             | 0.005  | 0.001 | 0.92   | 1.00             |
| PMA at scan                     | 0.347  | 0.001 | <0.001 | <b>&lt;0.001</b> | -0.629 | 0.001 | <0.001 | <b>&lt;0.001</b> | -0.495 | 0.001 | <0.001 | <b>&lt;0.001</b> | -0.635 | 0.001 | <0.001 | <b>&lt;0.001</b> |
| Sex                             | -0.101 | 0.002 | 0.06   | 0.34             | -0.034 | 0.003 | 0.46   | 0.51             | -0.087 | 0.004 | 0.09   | 0.10             | 0.004  | 0.003 | 0.93   | 0.98             |

Bolded values represent statistical significance after FDR correction for multiple comparisons.  $\beta$ , standardized beta coefficient; SE, standard error;  $q$ , FDR-corrected p-value; IL, interleukin; TNF- $\alpha$ , tumor necrosis factor alpha; FA, fractional anisotropy; MD, mean diffusivity; AD, axial diffusivity; RD, radial diffusivity; GA, gestational age; PMA, infant postmenstrual age; Sex, child sex.

Excluding neonates born <34 weeks' gestation and/or weighing <2,000g at birth, we investigated the moderating role of family SES group in the relationship between maternal cytokine concentrations and neonatal dMRI parameters. As shown in Table S8, family SES moderated the relationship between maternal TNF- $\alpha$  and CB AD ( $\beta = 0.21$ ;  $q = 0.02$ ) and CBIF AD ( $\beta = 0.20$ ;  $q = 0.02$ ).

**Table S10.** Specificity test excluding neonates born <34 weeks' gestation and/or weighing <2,000g at birth. Multiple linear regression results of the moderating role of family SES group in the relationship between maternal cytokine concentrations and neonatal dMRI parameters.

| IL-6                            |         |       |        |        |         |       |        |             |         |       |        |             |         |       |        |             |
|---------------------------------|---------|-------|--------|--------|---------|-------|--------|-------------|---------|-------|--------|-------------|---------|-------|--------|-------------|
|                                 | FA      |       |        |        | MD      |       |        |             | AD      |       |        |             | RD      |       |        |             |
|                                 | $\beta$ | SE    | $p$    | $q$    | $\beta$ | SE    | $p$    | $q$         | $\beta$ | SE    | $p$    | $q$         | $\beta$ | SE    | $p$    | $q$         |
| <b>Corpus Callosum</b>          |         |       |        |        |         |       |        |             |         |       |        |             |         |       |        |             |
| IL-6                            | -0.020  | 0.002 | 0.76   | 0.85   | -0.090  | 0.002 | 0.14   | 0.26        | -0.096  | 0.002 | 0.19   | 0.20        | -0.052  | 0.003 | 0.39   | 0.53        |
| SES group                       | 0.080   | 0.003 | 0.12   | 0.37   | -0.018  | 0.003 | 0.72   | 0.72        | 0.126   | 0.004 | 0.03   | 0.05        | -0.053  | 0.004 | 0.28   | 0.28        |
| GA at delivery                  | 0.028   | 0.001 | 0.62   | 0.93   | 0.039   | 0.001 | 0.47   | 0.63        | 0.072   | 0.001 | 0.26   | 0.73        | 0.019   | 0.002 | 0.72   | 0.79        |
| PMA at scan                     | 0.468   | 0.001 | <0.001 | <0.001 | -0.574  | 0.001 | <0.001 | <0.001      | -0.224  | 0.001 | <0.001 | <0.001      | -0.565  | 0.002 | <0.001 | <0.001      |
| Sex                             | -0.081  | 0.003 | 0.11   | 0.27   | -0.008  | 0.003 | 0.87   | 0.87        | -0.083  | 0.003 | 0.15   | 0.18        | 0.042   | 0.004 | 0.38   | 0.82        |
| IL-6:SES group                  | -0.089  | 0.004 | 0.16   | 0.72   | 0.120   | 0.004 | 0.05   | 0.45        | 0.013   | 0.004 | 0.86   | 0.86        | 0.118   | 0.005 | 0.05   | 0.46        |
| <b>Superior Cingulum Bundle</b> |         |       |        |        |         |       |        |             |         |       |        |             |         |       |        |             |
| IL-6                            | 0.026   | 0.002 | 0.71   | 0.85   | -0.100  | 0.003 | 0.11   | 0.26        | -0.087  | 0.004 | 0.20   | 0.20        | -0.090  | 0.004 | 0.15   | 0.51        |
| SES group                       | -0.140  | 0.003 | 0.01   | 0.12   | 0.144   | 0.005 | 0.01   | <b>0.02</b> | 0.050   | 0.005 | 0.36   | 0.36        | 0.165   | 0.005 | <0.01  | <b>0.01</b> |
| GA at delivery                  | 0.144   | 0.001 | 0.02   | 0.05   | -0.069  | 0.002 | 0.21   | 0.48        | 0.018   | 0.002 | 0.76   | 0.90        | -0.101  | 0.002 | 0.07   | 0.13        |
| PMA at scan                     | 0.317   | 0.001 | <0.001 | <0.001 | -0.504  | 0.002 | <0.001 | <0.001      | -0.400  | 0.002 | <0.001 | <0.001      | -0.480  | 0.002 | <0.001 | <0.001      |
| Sex                             | -0.103  | 0.003 | 0.06   | 0.27   | -0.037  | 0.004 | 0.46   | 0.60        | -0.131  | 0.005 | 0.02   | 0.05        | 0.010   | 0.005 | 0.84   | 0.94        |
| IL-6:SES group                  | 0.057   | 0.003 | 0.40   | 0.88   | 0.073   | 0.005 | 0.25   | 0.80        | 0.118   | 0.006 | 0.08   | 0.44        | 0.040   | 0.006 | 0.52   | 0.75        |
| <b>Corticospinal Tract</b>      |         |       |        |        |         |       |        |             |         |       |        |             |         |       |        |             |
| IL-6                            | -0.164  | 0.002 | 0.01   | 0.06   | 0.034   | 0.003 | 0.52   | 0.67        | -0.095  | 0.002 | 0.10   | 0.14        | 0.074   | 0.004 | 0.17   | 0.51        |
| SES group                       | 0.011   | 0.003 | 0.82   | 0.92   | 0.112   | 0.004 | 0.01   | <b>0.02</b> | 0.199   | 0.003 | <0.001 | <0.001      | 0.075   | 0.005 | 0.09   | 0.10        |
| GA at delivery                  | 0.010   | 0.001 | 0.86   | 0.96   | 0.022   | 0.002 | 0.63   | 0.63        | 0.032   | 0.001 | 0.52   | 0.77        | 0.013   | 0.002 | 0.78   | 0.79        |
| PMA at scan                     | 0.543   | 0.001 | <0.001 | <0.001 | -0.714  | 0.001 | <0.001 | <0.001      | -0.647  | 0.001 | <0.001 | <0.001      | -0.688  | 0.002 | <0.001 | <0.001      |
| Sex                             | -0.005  | 0.003 | 0.91   | 1.00   | -0.044  | 0.004 | 0.30   | 0.53        | -0.072  | 0.003 | 0.11   | 0.16        | -0.032  | 0.005 | 0.45   | 0.82        |
| IL-6:SES group                  | -0.041  | 0.003 | 0.49   | 0.88   | 0.044   | 0.005 | 0.40   | 0.80        | 0.017   | 0.004 | 0.76   | 0.86        | 0.049   | 0.006 | 0.36   | 0.75        |
| <b>Optic Radiation</b>          |         |       |        |        |         |       |        |             |         |       |        |             |         |       |        |             |
| IL-6                            | -0.105  | 0.002 | 0.09   | 0.20   | -0.022  | 0.003 | 0.70   | 0.77        | -0.104  | 0.003 | 0.11   | 0.14        | 0.016   | 0.004 | 0.78   | 0.78        |
| SES group                       | 0.068   | 0.003 | 0.18   | 0.41   | 0.161   | 0.005 | <0.01  | <0.01       | 0.276   | 0.005 | <0.001 | <0.001      | 0.105   | 0.006 | 0.02   | 0.05        |
| GA at delivery                  | -0.001  | 0.001 | 0.98   | 0.98   | -0.124  | 0.002 | 0.02   | 0.12        | -0.156  | 0.002 | 0.01   | 0.06        | -0.097  | 0.002 | 0.05   | 0.13        |
| PMA at scan                     | 0.534   | 0.001 | <0.001 | <0.001 | -0.573  | 0.002 | <0.001 | <0.001      | -0.315  | 0.002 | <0.001 | <0.001      | -0.606  | 0.002 | <0.001 | <0.001      |
| Sex                             | 0.002   | 0.003 | 0.97   | 1.00   | -0.118  | 0.005 | 0.01   | 0.06        | -0.180  | 0.005 | <0.01  | <0.01       | -0.089  | 0.006 | 0.05   | 0.22        |
| IL-6:SES group                  | 0.024   | 0.004 | 0.70   | 0.88   | -0.021  | 0.006 | 0.71   | 0.80        | -0.013  | 0.006 | 0.84   | 0.86        | -0.025  | 0.007 | 0.66   | 0.75        |
| <b>Uncinate Fasciculus</b>      |         |       |        |        |         |       |        |             |         |       |        |             |         |       |        |             |
| IL-6                            | -0.130  | 0.002 | 0.04   | 0.11   | -0.098  | 0.003 | 0.11   | 0.26        | -0.195  | 0.004 | <0.01  | <b>0.04</b> | -0.043  | 0.003 | 0.47   | 0.53        |
| SES group                       | -0.053  | 0.003 | 0.29   | 0.52   | 0.109   | 0.004 | 0.03   | <b>0.04</b> | 0.083   | 0.005 | 0.14   | 0.18        | 0.103   | 0.005 | 0.03   | 0.05        |
| GA at delivery                  | 0.108   | 0.001 | 0.05   | 0.08   | 0.036   | 0.002 | 0.50   | 0.63        | 0.125   | 0.002 | 0.04   | 0.17        | -0.014  | 0.002 | 0.79   | 0.79        |
| PMA at scan                     | 0.496   | 0.001 | <0.001 | <0.001 | -0.567  | 0.001 | <0.001 | <0.001      | -0.284  | 0.002 | <0.001 | <0.001      | -0.615  | 0.002 | <0.001 | <0.001      |

| Sex                                                                                                                                                                                                                                                                                                                                                                                                                                                                                                                                                                                                                                                                                                                                                                                                                                                                                                                                                                                                                                                                                                                                                                                                                                                                                                                                                                                                                                                                                                                                                                                                                                                                                                                                                                                                                                                                                                                                                                                                                                                                                                                                                                                                                                                                                                                                                                                                           | -0.080  | 0.002 | 0.10   | 0.27             | -0.056  | 0.004 | 0.25   | 0.53             | -0.122  | 0.005 | 0.02   | 0.06             | -0.020  | 0.004 | 0.67   | 0.88             |  |    |  |  |  |    |  |  |  |    |  |  |  |    |  |  |  |         |    |     |     |         |    |     |     |         |    |     |     |         |    |     |     |                        |  |  |  |  |  |  |  |  |  |  |  |  |  |  |  |  |      |       |       |      |      |       |       |      |      |       |       |      |      |       |       |      |      |           |       |       |      |      |        |       |      |      |       |       |      |             |        |       |      |      |                |       |       |      |      |       |       |      |      |       |       |      |      |       |       |      |      |             |       |       |        |                  |        |       |        |                  |        |       |        |                  |        |       |        |                  |     |        |       |      |      |        |       |      |      |        |       |      |      |       |       |      |      |                |        |       |      |      |        |       |      |      |        |       |      |      |        |       |      |      |
|---------------------------------------------------------------------------------------------------------------------------------------------------------------------------------------------------------------------------------------------------------------------------------------------------------------------------------------------------------------------------------------------------------------------------------------------------------------------------------------------------------------------------------------------------------------------------------------------------------------------------------------------------------------------------------------------------------------------------------------------------------------------------------------------------------------------------------------------------------------------------------------------------------------------------------------------------------------------------------------------------------------------------------------------------------------------------------------------------------------------------------------------------------------------------------------------------------------------------------------------------------------------------------------------------------------------------------------------------------------------------------------------------------------------------------------------------------------------------------------------------------------------------------------------------------------------------------------------------------------------------------------------------------------------------------------------------------------------------------------------------------------------------------------------------------------------------------------------------------------------------------------------------------------------------------------------------------------------------------------------------------------------------------------------------------------------------------------------------------------------------------------------------------------------------------------------------------------------------------------------------------------------------------------------------------------------------------------------------------------------------------------------------------------|---------|-------|--------|------------------|---------|-------|--------|------------------|---------|-------|--------|------------------|---------|-------|--------|------------------|--|----|--|--|--|----|--|--|--|----|--|--|--|----|--|--|--|---------|----|-----|-----|---------|----|-----|-----|---------|----|-----|-----|---------|----|-----|-----|------------------------|--|--|--|--|--|--|--|--|--|--|--|--|--|--|--|--|------|-------|-------|------|------|-------|-------|------|------|-------|-------|------|------|-------|-------|------|------|-----------|-------|-------|------|------|--------|-------|------|------|-------|-------|------|-------------|--------|-------|------|------|----------------|-------|-------|------|------|-------|-------|------|------|-------|-------|------|------|-------|-------|------|------|-------------|-------|-------|--------|------------------|--------|-------|--------|------------------|--------|-------|--------|------------------|--------|-------|--------|------------------|-----|--------|-------|------|------|--------|-------|------|------|--------|-------|------|------|-------|-------|------|------|----------------|--------|-------|------|------|--------|-------|------|------|--------|-------|------|------|--------|-------|------|------|
| IL-6:SES group                                                                                                                                                                                                                                                                                                                                                                                                                                                                                                                                                                                                                                                                                                                                                                                                                                                                                                                                                                                                                                                                                                                                                                                                                                                                                                                                                                                                                                                                                                                                                                                                                                                                                                                                                                                                                                                                                                                                                                                                                                                                                                                                                                                                                                                                                                                                                                                                | -0.002  | 0.003 | 0.98   | 0.98             | -0.062  | 0.005 | 0.31   | 0.80             | -0.071  | 0.006 | 0.30   | 0.86             | -0.046  | 0.005 | 0.44   | 0.75             |  |    |  |  |  |    |  |  |  |    |  |  |  |    |  |  |  |         |    |     |     |         |    |     |     |         |    |     |     |         |    |     |     |                        |  |  |  |  |  |  |  |  |  |  |  |  |  |  |  |  |      |       |       |      |      |       |       |      |      |       |       |      |      |       |       |      |      |           |       |       |      |      |        |       |      |      |       |       |      |             |        |       |      |      |                |       |       |      |      |       |       |      |      |       |       |      |      |       |       |      |      |             |       |       |        |                  |        |       |        |                  |        |       |        |                  |        |       |        |                  |     |        |       |      |      |        |       |      |      |        |       |      |      |       |       |      |      |                |        |       |      |      |        |       |      |      |        |       |      |      |        |       |      |      |
| <b>Inferior Fronto-Occipital Fasciculus</b>                                                                                                                                                                                                                                                                                                                                                                                                                                                                                                                                                                                                                                                                                                                                                                                                                                                                                                                                                                                                                                                                                                                                                                                                                                                                                                                                                                                                                                                                                                                                                                                                                                                                                                                                                                                                                                                                                                                                                                                                                                                                                                                                                                                                                                                                                                                                                                   |         |       |        |                  |         |       |        |                  |         |       |        |                  |         |       |        |                  |  |    |  |  |  |    |  |  |  |    |  |  |  |    |  |  |  |         |    |     |     |         |    |     |     |         |    |     |     |         |    |     |     |                        |  |  |  |  |  |  |  |  |  |  |  |  |  |  |  |  |      |       |       |      |      |       |       |      |      |       |       |      |      |       |       |      |      |           |       |       |      |      |        |       |      |      |       |       |      |             |        |       |      |      |                |       |       |      |      |       |       |      |      |       |       |      |      |       |       |      |      |             |       |       |        |                  |        |       |        |                  |        |       |        |                  |        |       |        |                  |     |        |       |      |      |        |       |      |      |        |       |      |      |       |       |      |      |                |        |       |      |      |        |       |      |      |        |       |      |      |        |       |      |      |
| IL-6                                                                                                                                                                                                                                                                                                                                                                                                                                                                                                                                                                                                                                                                                                                                                                                                                                                                                                                                                                                                                                                                                                                                                                                                                                                                                                                                                                                                                                                                                                                                                                                                                                                                                                                                                                                                                                                                                                                                                                                                                                                                                                                                                                                                                                                                                                                                                                                                          | -0.019  | 0.002 | 0.74   | 0.85             | -0.065  | 0.003 | 0.23   | 0.35             | -0.128  | 0.003 | 0.05   | 0.10             | -0.040  | 0.004 | 0.46   | 0.53             |  |    |  |  |  |    |  |  |  |    |  |  |  |    |  |  |  |         |    |     |     |         |    |     |     |         |    |     |     |         |    |     |     |                        |  |  |  |  |  |  |  |  |  |  |  |  |  |  |  |  |      |       |       |      |      |       |       |      |      |       |       |      |      |       |       |      |      |           |       |       |      |      |        |       |      |      |       |       |      |             |        |       |      |      |                |       |       |      |      |       |       |      |      |       |       |      |      |       |       |      |      |             |       |       |        |                  |        |       |        |                  |        |       |        |                  |        |       |        |                  |     |        |       |      |      |        |       |      |      |        |       |      |      |       |       |      |      |                |        |       |      |      |        |       |      |      |        |       |      |      |        |       |      |      |
| SES group                                                                                                                                                                                                                                                                                                                                                                                                                                                                                                                                                                                                                                                                                                                                                                                                                                                                                                                                                                                                                                                                                                                                                                                                                                                                                                                                                                                                                                                                                                                                                                                                                                                                                                                                                                                                                                                                                                                                                                                                                                                                                                                                                                                                                                                                                                                                                                                                     | 0.000   | 0.003 | 1.00   | 1.00             | 0.118   | 0.005 | 0.01   | <b>0.02</b>      | 0.221   | 0.004 | <0.001 | <b>&lt;0.001</b> | 0.085   | 0.006 | 0.05   | 0.08             |  |    |  |  |  |    |  |  |  |    |  |  |  |    |  |  |  |         |    |     |     |         |    |     |     |         |    |     |     |         |    |     |     |                        |  |  |  |  |  |  |  |  |  |  |  |  |  |  |  |  |      |       |       |      |      |       |       |      |      |       |       |      |      |       |       |      |      |           |       |       |      |      |        |       |      |      |       |       |      |             |        |       |      |      |                |       |       |      |      |       |       |      |      |       |       |      |      |       |       |      |      |             |       |       |        |                  |        |       |        |                  |        |       |        |                  |        |       |        |                  |     |        |       |      |      |        |       |      |      |        |       |      |      |       |       |      |      |                |        |       |      |      |        |       |      |      |        |       |      |      |        |       |      |      |
| GA at delivery                                                                                                                                                                                                                                                                                                                                                                                                                                                                                                                                                                                                                                                                                                                                                                                                                                                                                                                                                                                                                                                                                                                                                                                                                                                                                                                                                                                                                                                                                                                                                                                                                                                                                                                                                                                                                                                                                                                                                                                                                                                                                                                                                                                                                                                                                                                                                                                                | 0.139   | 0.001 | 0.01   | 0.05             | -0.098  | 0.002 | 0.04   | 0.12             | -0.005  | 0.001 | 0.92   | 0.92             | -0.115  | 0.002 | 0.02   | 0.09             |  |    |  |  |  |    |  |  |  |    |  |  |  |    |  |  |  |         |    |     |     |         |    |     |     |         |    |     |     |         |    |     |     |                        |  |  |  |  |  |  |  |  |  |  |  |  |  |  |  |  |      |       |       |      |      |       |       |      |      |       |       |      |      |       |       |      |      |           |       |       |      |      |        |       |      |      |       |       |      |             |        |       |      |      |                |       |       |      |      |       |       |      |      |       |       |      |      |       |       |      |      |             |       |       |        |                  |        |       |        |                  |        |       |        |                  |        |       |        |                  |     |        |       |      |      |        |       |      |      |        |       |      |      |       |       |      |      |                |        |       |      |      |        |       |      |      |        |       |      |      |        |       |      |      |
| PMA at scan                                                                                                                                                                                                                                                                                                                                                                                                                                                                                                                                                                                                                                                                                                                                                                                                                                                                                                                                                                                                                                                                                                                                                                                                                                                                                                                                                                                                                                                                                                                                                                                                                                                                                                                                                                                                                                                                                                                                                                                                                                                                                                                                                                                                                                                                                                                                                                                                   | 0.594   | 0.001 | <0.001 | <b>&lt;0.001</b> | -0.643  | 0.002 | <0.001 | <b>&lt;0.001</b> | -0.459  | 0.001 | <0.001 | <b>&lt;0.001</b> | -0.646  | 0.002 | <0.001 | <b>&lt;0.001</b> |  |    |  |  |  |    |  |  |  |    |  |  |  |    |  |  |  |         |    |     |     |         |    |     |     |         |    |     |     |         |    |     |     |                        |  |  |  |  |  |  |  |  |  |  |  |  |  |  |  |  |      |       |       |      |      |       |       |      |      |       |       |      |      |       |       |      |      |           |       |       |      |      |        |       |      |      |       |       |      |             |        |       |      |      |                |       |       |      |      |       |       |      |      |       |       |      |      |       |       |      |      |             |       |       |        |                  |        |       |        |                  |        |       |        |                  |        |       |        |                  |     |        |       |      |      |        |       |      |      |        |       |      |      |       |       |      |      |                |        |       |      |      |        |       |      |      |        |       |      |      |        |       |      |      |
| Sex                                                                                                                                                                                                                                                                                                                                                                                                                                                                                                                                                                                                                                                                                                                                                                                                                                                                                                                                                                                                                                                                                                                                                                                                                                                                                                                                                                                                                                                                                                                                                                                                                                                                                                                                                                                                                                                                                                                                                                                                                                                                                                                                                                                                                                                                                                                                                                                                           | 0.000   | 0.003 | 1.00   | 1.00             | -0.101  | 0.005 | 0.02   | 0.06             | -0.168  | 0.003 | <0.01  | <b>&lt;0.01</b>  | -0.070  | 0.006 | 0.10   | 0.30             |  |    |  |  |  |    |  |  |  |    |  |  |  |    |  |  |  |         |    |     |     |         |    |     |     |         |    |     |     |         |    |     |     |                        |  |  |  |  |  |  |  |  |  |  |  |  |  |  |  |  |      |       |       |      |      |       |       |      |      |       |       |      |      |       |       |      |      |           |       |       |      |      |        |       |      |      |       |       |      |             |        |       |      |      |                |       |       |      |      |       |       |      |      |       |       |      |      |       |       |      |      |             |       |       |        |                  |        |       |        |                  |        |       |        |                  |        |       |        |                  |     |        |       |      |      |        |       |      |      |        |       |      |      |       |       |      |      |                |        |       |      |      |        |       |      |      |        |       |      |      |        |       |      |      |
| IL-6:SES group                                                                                                                                                                                                                                                                                                                                                                                                                                                                                                                                                                                                                                                                                                                                                                                                                                                                                                                                                                                                                                                                                                                                                                                                                                                                                                                                                                                                                                                                                                                                                                                                                                                                                                                                                                                                                                                                                                                                                                                                                                                                                                                                                                                                                                                                                                                                                                                                | -0.026  | 0.004 | 0.64   | 0.88             | 0.037   | 0.005 | 0.50   | 0.80             | 0.040   | 0.004 | 0.53   | 0.86             | 0.033   | 0.007 | 0.54   | 0.75             |  |    |  |  |  |    |  |  |  |    |  |  |  |    |  |  |  |         |    |     |     |         |    |     |     |         |    |     |     |         |    |     |     |                        |  |  |  |  |  |  |  |  |  |  |  |  |  |  |  |  |      |       |       |      |      |       |       |      |      |       |       |      |      |       |       |      |      |           |       |       |      |      |        |       |      |      |       |       |      |             |        |       |      |      |                |       |       |      |      |       |       |      |      |       |       |      |      |       |       |      |      |             |       |       |        |                  |        |       |        |                  |        |       |        |                  |        |       |        |                  |     |        |       |      |      |        |       |      |      |        |       |      |      |       |       |      |      |                |        |       |      |      |        |       |      |      |        |       |      |      |        |       |      |      |
| <b>Anterior Limb of Internal Capsule</b>                                                                                                                                                                                                                                                                                                                                                                                                                                                                                                                                                                                                                                                                                                                                                                                                                                                                                                                                                                                                                                                                                                                                                                                                                                                                                                                                                                                                                                                                                                                                                                                                                                                                                                                                                                                                                                                                                                                                                                                                                                                                                                                                                                                                                                                                                                                                                                      |         |       |        |                  |         |       |        |                  |         |       |        |                  |         |       |        |                  |  |    |  |  |  |    |  |  |  |    |  |  |  |    |  |  |  |         |    |     |     |         |    |     |     |         |    |     |     |         |    |     |     |                        |  |  |  |  |  |  |  |  |  |  |  |  |  |  |  |  |      |       |       |      |      |       |       |      |      |       |       |      |      |       |       |      |      |           |       |       |      |      |        |       |      |      |       |       |      |             |        |       |      |      |                |       |       |      |      |       |       |      |      |       |       |      |      |       |       |      |      |             |       |       |        |                  |        |       |        |                  |        |       |        |                  |        |       |        |                  |     |        |       |      |      |        |       |      |      |        |       |      |      |       |       |      |      |                |        |       |      |      |        |       |      |      |        |       |      |      |        |       |      |      |
| IL-6                                                                                                                                                                                                                                                                                                                                                                                                                                                                                                                                                                                                                                                                                                                                                                                                                                                                                                                                                                                                                                                                                                                                                                                                                                                                                                                                                                                                                                                                                                                                                                                                                                                                                                                                                                                                                                                                                                                                                                                                                                                                                                                                                                                                                                                                                                                                                                                                          | 0.003   | 0.002 | 0.96   | 0.96             | -0.097  | 0.004 | 0.10   | 0.26             | -0.142  | 0.003 | 0.03   | 0.10             | -0.079  | 0.005 | 0.17   | 0.51             |  |    |  |  |  |    |  |  |  |    |  |  |  |    |  |  |  |         |    |     |     |         |    |     |     |         |    |     |     |         |    |     |     |                        |  |  |  |  |  |  |  |  |  |  |  |  |  |  |  |  |      |       |       |      |      |       |       |      |      |       |       |      |      |       |       |      |      |           |       |       |      |      |        |       |      |      |       |       |      |             |        |       |      |      |                |       |       |      |      |       |       |      |      |       |       |      |      |       |       |      |      |             |       |       |        |                  |        |       |        |                  |        |       |        |                  |        |       |        |                  |     |        |       |      |      |        |       |      |      |        |       |      |      |       |       |      |      |                |        |       |      |      |        |       |      |      |        |       |      |      |        |       |      |      |
| SES group                                                                                                                                                                                                                                                                                                                                                                                                                                                                                                                                                                                                                                                                                                                                                                                                                                                                                                                                                                                                                                                                                                                                                                                                                                                                                                                                                                                                                                                                                                                                                                                                                                                                                                                                                                                                                                                                                                                                                                                                                                                                                                                                                                                                                                                                                                                                                                                                     | 0.014   | 0.003 | 0.76   | 0.92             | 0.102   | 0.006 | 0.03   | <b>0.04</b>      | 0.151   | 0.005 | 0.01   | <b>0.01</b>      | 0.079   | 0.007 | 0.09   | 0.10             |  |    |  |  |  |    |  |  |  |    |  |  |  |    |  |  |  |         |    |     |     |         |    |     |     |         |    |     |     |         |    |     |     |                        |  |  |  |  |  |  |  |  |  |  |  |  |  |  |  |  |      |       |       |      |      |       |       |      |      |       |       |      |      |       |       |      |      |           |       |       |      |      |        |       |      |      |       |       |      |             |        |       |      |      |                |       |       |      |      |       |       |      |      |       |       |      |      |       |       |      |      |             |       |       |        |                  |        |       |        |                  |        |       |        |                  |        |       |        |                  |     |        |       |      |      |        |       |      |      |        |       |      |      |       |       |      |      |                |        |       |      |      |        |       |      |      |        |       |      |      |        |       |      |      |
| GA at delivery                                                                                                                                                                                                                                                                                                                                                                                                                                                                                                                                                                                                                                                                                                                                                                                                                                                                                                                                                                                                                                                                                                                                                                                                                                                                                                                                                                                                                                                                                                                                                                                                                                                                                                                                                                                                                                                                                                                                                                                                                                                                                                                                                                                                                                                                                                                                                                                                | 0.120   | 0.001 | 0.02   | 0.05             | -0.106  | 0.002 | 0.04   | 0.12             | -0.047  | 0.002 | 0.42   | 0.75             | -0.118  | 0.002 | 0.02   | 0.09             |  |    |  |  |  |    |  |  |  |    |  |  |  |    |  |  |  |         |    |     |     |         |    |     |     |         |    |     |     |         |    |     |     |                        |  |  |  |  |  |  |  |  |  |  |  |  |  |  |  |  |      |       |       |      |      |       |       |      |      |       |       |      |      |       |       |      |      |           |       |       |      |      |        |       |      |      |       |       |      |             |        |       |      |      |                |       |       |      |      |       |       |      |      |       |       |      |      |       |       |      |      |             |       |       |        |                  |        |       |        |                  |        |       |        |                  |        |       |        |                  |     |        |       |      |      |        |       |      |      |        |       |      |      |       |       |      |      |                |        |       |      |      |        |       |      |      |        |       |      |      |        |       |      |      |
| PMA at scan                                                                                                                                                                                                                                                                                                                                                                                                                                                                                                                                                                                                                                                                                                                                                                                                                                                                                                                                                                                                                                                                                                                                                                                                                                                                                                                                                                                                                                                                                                                                                                                                                                                                                                                                                                                                                                                                                                                                                                                                                                                                                                                                                                                                                                                                                                                                                                                                   | 0.596   | 0.001 | <0.001 | <b>&lt;0.001</b> | -0.576  | 0.002 | <0.001 | <b>&lt;0.001</b> | -0.437  | 0.002 | <0.001 | <b>&lt;0.001</b> | -0.598  | 0.002 | <0.001 | <b>&lt;0.001</b> |  |    |  |  |  |    |  |  |  |    |  |  |  |    |  |  |  |         |    |     |     |         |    |     |     |         |    |     |     |         |    |     |     |                        |  |  |  |  |  |  |  |  |  |  |  |  |  |  |  |  |      |       |       |      |      |       |       |      |      |       |       |      |      |       |       |      |      |           |       |       |      |      |        |       |      |      |       |       |      |             |        |       |      |      |                |       |       |      |      |       |       |      |      |       |       |      |      |       |       |      |      |             |       |       |        |                  |        |       |        |                  |        |       |        |                  |        |       |        |                  |     |        |       |      |      |        |       |      |      |        |       |      |      |       |       |      |      |                |        |       |      |      |        |       |      |      |        |       |      |      |        |       |      |      |
| Sex                                                                                                                                                                                                                                                                                                                                                                                                                                                                                                                                                                                                                                                                                                                                                                                                                                                                                                                                                                                                                                                                                                                                                                                                                                                                                                                                                                                                                                                                                                                                                                                                                                                                                                                                                                                                                                                                                                                                                                                                                                                                                                                                                                                                                                                                                                                                                                                                           | -0.029  | 0.003 | 0.51   | 0.92             | -0.030  | 0.006 | 0.52   | 0.60             | -0.049  | 0.005 | 0.34   | 0.34             | -0.019  | 0.006 | 0.68   | 0.88             |  |    |  |  |  |    |  |  |  |    |  |  |  |    |  |  |  |         |    |     |     |         |    |     |     |         |    |     |     |         |    |     |     |                        |  |  |  |  |  |  |  |  |  |  |  |  |  |  |  |  |      |       |       |      |      |       |       |      |      |       |       |      |      |       |       |      |      |           |       |       |      |      |        |       |      |      |       |       |      |             |        |       |      |      |                |       |       |      |      |       |       |      |      |       |       |      |      |       |       |      |      |             |       |       |        |                  |        |       |        |                  |        |       |        |                  |        |       |        |                  |     |        |       |      |      |        |       |      |      |        |       |      |      |       |       |      |      |                |        |       |      |      |        |       |      |      |        |       |      |      |        |       |      |      |
| IL-6:SES group                                                                                                                                                                                                                                                                                                                                                                                                                                                                                                                                                                                                                                                                                                                                                                                                                                                                                                                                                                                                                                                                                                                                                                                                                                                                                                                                                                                                                                                                                                                                                                                                                                                                                                                                                                                                                                                                                                                                                                                                                                                                                                                                                                                                                                                                                                                                                                                                | 0.016   | 0.003 | 0.78   | 0.88             | 0.022   | 0.007 | 0.70   | 0.80             | 0.047   | 0.006 | 0.47   | 0.86             | 0.014   | 0.008 | 0.81   | 0.81             |  |    |  |  |  |    |  |  |  |    |  |  |  |    |  |  |  |         |    |     |     |         |    |     |     |         |    |     |     |         |    |     |     |                        |  |  |  |  |  |  |  |  |  |  |  |  |  |  |  |  |      |       |       |      |      |       |       |      |      |       |       |      |      |       |       |      |      |           |       |       |      |      |        |       |      |      |       |       |      |             |        |       |      |      |                |       |       |      |      |       |       |      |      |       |       |      |      |       |       |      |      |             |       |       |        |                  |        |       |        |                  |        |       |        |                  |        |       |        |                  |     |        |       |      |      |        |       |      |      |        |       |      |      |       |       |      |      |                |        |       |      |      |        |       |      |      |        |       |      |      |        |       |      |      |
| <b>Inferior Cingulum Bundle</b>                                                                                                                                                                                                                                                                                                                                                                                                                                                                                                                                                                                                                                                                                                                                                                                                                                                                                                                                                                                                                                                                                                                                                                                                                                                                                                                                                                                                                                                                                                                                                                                                                                                                                                                                                                                                                                                                                                                                                                                                                                                                                                                                                                                                                                                                                                                                                                               |         |       |        |                  |         |       |        |                  |         |       |        |                  |         |       |        |                  |  |    |  |  |  |    |  |  |  |    |  |  |  |    |  |  |  |         |    |     |     |         |    |     |     |         |    |     |     |         |    |     |     |                        |  |  |  |  |  |  |  |  |  |  |  |  |  |  |  |  |      |       |       |      |      |       |       |      |      |       |       |      |      |       |       |      |      |           |       |       |      |      |        |       |      |      |       |       |      |             |        |       |      |      |                |       |       |      |      |       |       |      |      |       |       |      |      |       |       |      |      |             |       |       |        |                  |        |       |        |                  |        |       |        |                  |        |       |        |                  |     |        |       |      |      |        |       |      |      |        |       |      |      |       |       |      |      |                |        |       |      |      |        |       |      |      |        |       |      |      |        |       |      |      |
| IL-6                                                                                                                                                                                                                                                                                                                                                                                                                                                                                                                                                                                                                                                                                                                                                                                                                                                                                                                                                                                                                                                                                                                                                                                                                                                                                                                                                                                                                                                                                                                                                                                                                                                                                                                                                                                                                                                                                                                                                                                                                                                                                                                                                                                                                                                                                                                                                                                                          | -0.143  | 0.002 | 0.04   | 0.11             | -0.017  | 0.002 | 0.77   | 0.77             | -0.118  | 0.002 | 0.09   | 0.14             | 0.046   | 0.002 | 0.43   | 0.53             |  |    |  |  |  |    |  |  |  |    |  |  |  |    |  |  |  |         |    |     |     |         |    |     |     |         |    |     |     |         |    |     |     |                        |  |  |  |  |  |  |  |  |  |  |  |  |  |  |  |  |      |       |       |      |      |       |       |      |      |       |       |      |      |       |       |      |      |           |       |       |      |      |        |       |      |      |       |       |      |             |        |       |      |      |                |       |       |      |      |       |       |      |      |       |       |      |      |       |       |      |      |             |       |       |        |                  |        |       |        |                  |        |       |        |                  |        |       |        |                  |     |        |       |      |      |        |       |      |      |        |       |      |      |       |       |      |      |                |        |       |      |      |        |       |      |      |        |       |      |      |        |       |      |      |
| SES group                                                                                                                                                                                                                                                                                                                                                                                                                                                                                                                                                                                                                                                                                                                                                                                                                                                                                                                                                                                                                                                                                                                                                                                                                                                                                                                                                                                                                                                                                                                                                                                                                                                                                                                                                                                                                                                                                                                                                                                                                                                                                                                                                                                                                                                                                                                                                                                                     | -0.049  | 0.002 | 0.38   | 0.57             | 0.189   | 0.003 | <0.001 | <b>&lt;0.01</b>  | 0.159   | 0.004 | <0.01  | <b>0.01</b>      | 0.154   | 0.003 | <0.01  | <b>0.01</b>      |  |    |  |  |  |    |  |  |  |    |  |  |  |    |  |  |  |         |    |     |     |         |    |     |     |         |    |     |     |         |    |     |     |                        |  |  |  |  |  |  |  |  |  |  |  |  |  |  |  |  |      |       |       |      |      |       |       |      |      |       |       |      |      |       |       |      |      |           |       |       |      |      |        |       |      |      |       |       |      |             |        |       |      |      |                |       |       |      |      |       |       |      |      |       |       |      |      |       |       |      |      |             |       |       |        |                  |        |       |        |                  |        |       |        |                  |        |       |        |                  |     |        |       |      |      |        |       |      |      |        |       |      |      |       |       |      |      |                |        |       |      |      |        |       |      |      |        |       |      |      |        |       |      |      |
| GA at delivery                                                                                                                                                                                                                                                                                                                                                                                                                                                                                                                                                                                                                                                                                                                                                                                                                                                                                                                                                                                                                                                                                                                                                                                                                                                                                                                                                                                                                                                                                                                                                                                                                                                                                                                                                                                                                                                                                                                                                                                                                                                                                                                                                                                                                                                                                                                                                                                                | -0.123  | 0.001 | 0.04   | 0.08             | 0.050   | 0.001 | 0.34   | 0.61             | -0.060  | 0.001 | 0.32   | 0.73             | 0.097   | 0.001 | 0.06   | 0.13             |  |    |  |  |  |    |  |  |  |    |  |  |  |    |  |  |  |         |    |     |     |         |    |     |     |         |    |     |     |         |    |     |     |                        |  |  |  |  |  |  |  |  |  |  |  |  |  |  |  |  |      |       |       |      |      |       |       |      |      |       |       |      |      |       |       |      |      |           |       |       |      |      |        |       |      |      |       |       |      |             |        |       |      |      |                |       |       |      |      |       |       |      |      |       |       |      |      |       |       |      |      |             |       |       |        |                  |        |       |        |                  |        |       |        |                  |        |       |        |                  |     |        |       |      |      |        |       |      |      |        |       |      |      |       |       |      |      |                |        |       |      |      |        |       |      |      |        |       |      |      |        |       |      |      |
| PMA at scan                                                                                                                                                                                                                                                                                                                                                                                                                                                                                                                                                                                                                                                                                                                                                                                                                                                                                                                                                                                                                                                                                                                                                                                                                                                                                                                                                                                                                                                                                                                                                                                                                                                                                                                                                                                                                                                                                                                                                                                                                                                                                                                                                                                                                                                                                                                                                                                                   | 0.425   | 0.001 | <0.001 | <b>&lt;0.001</b> | -0.619  | 0.001 | <0.001 | <b>&lt;0.001</b> | -0.327  | 0.001 | <0.001 | <b>&lt;0.001</b> | -0.644  | 0.001 | <0.001 | <b>&lt;0.001</b> |  |    |  |  |  |    |  |  |  |    |  |  |  |    |  |  |  |         |    |     |     |         |    |     |     |         |    |     |     |         |    |     |     |                        |  |  |  |  |  |  |  |  |  |  |  |  |  |  |  |  |      |       |       |      |      |       |       |      |      |       |       |      |      |       |       |      |      |           |       |       |      |      |        |       |      |      |       |       |      |             |        |       |      |      |                |       |       |      |      |       |       |      |      |       |       |      |      |       |       |      |      |             |       |       |        |                  |        |       |        |                  |        |       |        |                  |        |       |        |                  |     |        |       |      |      |        |       |      |      |        |       |      |      |       |       |      |      |                |        |       |      |      |        |       |      |      |        |       |      |      |        |       |      |      |
| Sex                                                                                                                                                                                                                                                                                                                                                                                                                                                                                                                                                                                                                                                                                                                                                                                                                                                                                                                                                                                                                                                                                                                                                                                                                                                                                                                                                                                                                                                                                                                                                                                                                                                                                                                                                                                                                                                                                                                                                                                                                                                                                                                                                                                                                                                                                                                                                                                                           | -0.003  | 0.002 | 0.96   | 1.00             | -0.114  | 0.003 | 0.01   | 0.06             | -0.103  | 0.003 | 0.06   | 0.10             | -0.098  | 0.003 | 0.03   | 0.22             |  |    |  |  |  |    |  |  |  |    |  |  |  |    |  |  |  |         |    |     |     |         |    |     |     |         |    |     |     |         |    |     |     |                        |  |  |  |  |  |  |  |  |  |  |  |  |  |  |  |  |      |       |       |      |      |       |       |      |      |       |       |      |      |       |       |      |      |           |       |       |      |      |        |       |      |      |       |       |      |             |        |       |      |      |                |       |       |      |      |       |       |      |      |       |       |      |      |       |       |      |      |             |       |       |        |                  |        |       |        |                  |        |       |        |                  |        |       |        |                  |     |        |       |      |      |        |       |      |      |        |       |      |      |       |       |      |      |                |        |       |      |      |        |       |      |      |        |       |      |      |        |       |      |      |
| IL-6:SES group                                                                                                                                                                                                                                                                                                                                                                                                                                                                                                                                                                                                                                                                                                                                                                                                                                                                                                                                                                                                                                                                                                                                                                                                                                                                                                                                                                                                                                                                                                                                                                                                                                                                                                                                                                                                                                                                                                                                                                                                                                                                                                                                                                                                                                                                                                                                                                                                | 0.046   | 0.003 | 0.49   | 0.88             | -0.006  | 0.003 | 0.92   | 0.92             | 0.032   | 0.004 | 0.64   | 0.86             | -0.047  | 0.003 | 0.42   | 0.75             |  |    |  |  |  |    |  |  |  |    |  |  |  |    |  |  |  |         |    |     |     |         |    |     |     |         |    |     |     |         |    |     |     |                        |  |  |  |  |  |  |  |  |  |  |  |  |  |  |  |  |      |       |       |      |      |       |       |      |      |       |       |      |      |       |       |      |      |           |       |       |      |      |        |       |      |      |       |       |      |             |        |       |      |      |                |       |       |      |      |       |       |      |      |       |       |      |      |       |       |      |      |             |       |       |        |                  |        |       |        |                  |        |       |        |                  |        |       |        |                  |     |        |       |      |      |        |       |      |      |        |       |      |      |       |       |      |      |                |        |       |      |      |        |       |      |      |        |       |      |      |        |       |      |      |
| <b>Fornix</b>                                                                                                                                                                                                                                                                                                                                                                                                                                                                                                                                                                                                                                                                                                                                                                                                                                                                                                                                                                                                                                                                                                                                                                                                                                                                                                                                                                                                                                                                                                                                                                                                                                                                                                                                                                                                                                                                                                                                                                                                                                                                                                                                                                                                                                                                                                                                                                                                 |         |       |        |                  |         |       |        |                  |         |       |        |                  |         |       |        |                  |  |    |  |  |  |    |  |  |  |    |  |  |  |    |  |  |  |         |    |     |     |         |    |     |     |         |    |     |     |         |    |     |     |                        |  |  |  |  |  |  |  |  |  |  |  |  |  |  |  |  |      |       |       |      |      |       |       |      |      |       |       |      |      |       |       |      |      |           |       |       |      |      |        |       |      |      |       |       |      |             |        |       |      |      |                |       |       |      |      |       |       |      |      |       |       |      |      |       |       |      |      |             |       |       |        |                  |        |       |        |                  |        |       |        |                  |        |       |        |                  |     |        |       |      |      |        |       |      |      |        |       |      |      |       |       |      |      |                |        |       |      |      |        |       |      |      |        |       |      |      |        |       |      |      |
| IL-6                                                                                                                                                                                                                                                                                                                                                                                                                                                                                                                                                                                                                                                                                                                                                                                                                                                                                                                                                                                                                                                                                                                                                                                                                                                                                                                                                                                                                                                                                                                                                                                                                                                                                                                                                                                                                                                                                                                                                                                                                                                                                                                                                                                                                                                                                                                                                                                                          | -0.085  | 0.001 | 0.22   | 0.39             | -0.085  | 0.002 | 0.14   | 0.26             | -0.133  | 0.003 | 0.04   | 0.10             | -0.043  | 0.002 | 0.45   | 0.53             |  |    |  |  |  |    |  |  |  |    |  |  |  |    |  |  |  |         |    |     |     |         |    |     |     |         |    |     |     |         |    |     |     |                        |  |  |  |  |  |  |  |  |  |  |  |  |  |  |  |  |      |       |       |      |      |       |       |      |      |       |       |      |      |       |       |      |      |           |       |       |      |      |        |       |      |      |       |       |      |             |        |       |      |      |                |       |       |      |      |       |       |      |      |       |       |      |      |       |       |      |      |             |       |       |        |                  |        |       |        |                  |        |       |        |                  |        |       |        |                  |     |        |       |      |      |        |       |      |      |        |       |      |      |       |       |      |      |                |        |       |      |      |        |       |      |      |        |       |      |      |        |       |      |      |
| SES group                                                                                                                                                                                                                                                                                                                                                                                                                                                                                                                                                                                                                                                                                                                                                                                                                                                                                                                                                                                                                                                                                                                                                                                                                                                                                                                                                                                                                                                                                                                                                                                                                                                                                                                                                                                                                                                                                                                                                                                                                                                                                                                                                                                                                                                                                                                                                                                                     | -0.118  | 0.002 | 0.04   | 0.16             | 0.102   | 0.003 | 0.03   | <b>0.04</b>      | 0.055   | 0.004 | 0.30   | 0.33             | 0.121   | 0.003 | 0.01   | <b>0.03</b>      |  |    |  |  |  |    |  |  |  |    |  |  |  |    |  |  |  |         |    |     |     |         |    |     |     |         |    |     |     |         |    |     |     |                        |  |  |  |  |  |  |  |  |  |  |  |  |  |  |  |  |      |       |       |      |      |       |       |      |      |       |       |      |      |       |       |      |      |           |       |       |      |      |        |       |      |      |       |       |      |             |        |       |      |      |                |       |       |      |      |       |       |      |      |       |       |      |      |       |       |      |      |             |       |       |        |                  |        |       |        |                  |        |       |        |                  |        |       |        |                  |     |        |       |      |      |        |       |      |      |        |       |      |      |       |       |      |      |                |        |       |      |      |        |       |      |      |        |       |      |      |        |       |      |      |
| GA at delivery                                                                                                                                                                                                                                                                                                                                                                                                                                                                                                                                                                                                                                                                                                                                                                                                                                                                                                                                                                                                                                                                                                                                                                                                                                                                                                                                                                                                                                                                                                                                                                                                                                                                                                                                                                                                                                                                                                                                                                                                                                                                                                                                                                                                                                                                                                                                                                                                | 0.014   | 0.001 | 0.82   | 0.96             | -0.027  | 0.001 | 0.60   | 0.63             | -0.014  | 0.001 | 0.80   | 0.90             | -0.028  | 0.001 | 0.57   | 0.79             |  |    |  |  |  |    |  |  |  |    |  |  |  |    |  |  |  |         |    |     |     |         |    |     |     |         |    |     |     |         |    |     |     |                        |  |  |  |  |  |  |  |  |  |  |  |  |  |  |  |  |      |       |       |      |      |       |       |      |      |       |       |      |      |       |       |      |      |           |       |       |      |      |        |       |      |      |       |       |      |             |        |       |      |      |                |       |       |      |      |       |       |      |      |       |       |      |      |       |       |      |      |             |       |       |        |                  |        |       |        |                  |        |       |        |                  |        |       |        |                  |     |        |       |      |      |        |       |      |      |        |       |      |      |       |       |      |      |                |        |       |      |      |        |       |      |      |        |       |      |      |        |       |      |      |
| PMA at scan                                                                                                                                                                                                                                                                                                                                                                                                                                                                                                                                                                                                                                                                                                                                                                                                                                                                                                                                                                                                                                                                                                                                                                                                                                                                                                                                                                                                                                                                                                                                                                                                                                                                                                                                                                                                                                                                                                                                                                                                                                                                                                                                                                                                                                                                                                                                                                                                   | 0.366   | 0.001 | <0.001 | <b>&lt;0.001</b> | -0.629  | 0.001 | <0.001 | <b>&lt;0.001</b> | -0.489  | 0.001 | <0.001 | <b>&lt;0.001</b> | -0.639  | 0.001 | <0.001 | <b>&lt;0.001</b> |  |    |  |  |  |    |  |  |  |    |  |  |  |    |  |  |  |         |    |     |     |         |    |     |     |         |    |     |     |         |    |     |     |                        |  |  |  |  |  |  |  |  |  |  |  |  |  |  |  |  |      |       |       |      |      |       |       |      |      |       |       |      |      |       |       |      |      |           |       |       |      |      |        |       |      |      |       |       |      |             |        |       |      |      |                |       |       |      |      |       |       |      |      |       |       |      |      |       |       |      |      |             |       |       |        |                  |        |       |        |                  |        |       |        |                  |        |       |        |                  |     |        |       |      |      |        |       |      |      |        |       |      |      |       |       |      |      |                |        |       |      |      |        |       |      |      |        |       |      |      |        |       |      |      |
| Sex                                                                                                                                                                                                                                                                                                                                                                                                                                                                                                                                                                                                                                                                                                                                                                                                                                                                                                                                                                                                                                                                                                                                                                                                                                                                                                                                                                                                                                                                                                                                                                                                                                                                                                                                                                                                                                                                                                                                                                                                                                                                                                                                                                                                                                                                                                                                                                                                           | -0.085  | 0.002 | 0.12   | 0.27             | -0.028  | 0.003 | 0.53   | 0.60             | -0.072  | 0.004 | 0.16   | 0.18             | 0.002   | 0.003 | 0.96   | 0.96             |  |    |  |  |  |    |  |  |  |    |  |  |  |    |  |  |  |         |    |     |     |         |    |     |     |         |    |     |     |         |    |     |     |                        |  |  |  |  |  |  |  |  |  |  |  |  |  |  |  |  |      |       |       |      |      |       |       |      |      |       |       |      |      |       |       |      |      |           |       |       |      |      |        |       |      |      |       |       |      |             |        |       |      |      |                |       |       |      |      |       |       |      |      |       |       |      |      |       |       |      |      |             |       |       |        |                  |        |       |        |                  |        |       |        |                  |        |       |        |                  |     |        |       |      |      |        |       |      |      |        |       |      |      |       |       |      |      |                |        |       |      |      |        |       |      |      |        |       |      |      |        |       |      |      |
| IL-6:SES group                                                                                                                                                                                                                                                                                                                                                                                                                                                                                                                                                                                                                                                                                                                                                                                                                                                                                                                                                                                                                                                                                                                                                                                                                                                                                                                                                                                                                                                                                                                                                                                                                                                                                                                                                                                                                                                                                                                                                                                                                                                                                                                                                                                                                                                                                                                                                                                                | 0.128   | 0.002 | 0.06   | 0.55             | 0.025   | 0.003 | 0.66   | 0.80             | 0.106   | 0.005 | 0.10   | 0.44             | -0.024  | 0.003 | 0.67   | 0.75             |  |    |  |  |  |    |  |  |  |    |  |  |  |    |  |  |  |         |    |     |     |         |    |     |     |         |    |     |     |         |    |     |     |                        |  |  |  |  |  |  |  |  |  |  |  |  |  |  |  |  |      |       |       |      |      |       |       |      |      |       |       |      |      |       |       |      |      |           |       |       |      |      |        |       |      |      |       |       |      |             |        |       |      |      |                |       |       |      |      |       |       |      |      |       |       |      |      |       |       |      |      |             |       |       |        |                  |        |       |        |                  |        |       |        |                  |        |       |        |                  |     |        |       |      |      |        |       |      |      |        |       |      |      |       |       |      |      |                |        |       |      |      |        |       |      |      |        |       |      |      |        |       |      |      |
| <b>IL-8</b>                                                                                                                                                                                                                                                                                                                                                                                                                                                                                                                                                                                                                                                                                                                                                                                                                                                                                                                                                                                                                                                                                                                                                                                                                                                                                                                                                                                                                                                                                                                                                                                                                                                                                                                                                                                                                                                                                                                                                                                                                                                                                                                                                                                                                                                                                                                                                                                                   |         |       |        |                  |         |       |        |                  |         |       |        |                  |         |       |        |                  |  |    |  |  |  |    |  |  |  |    |  |  |  |    |  |  |  |         |    |     |     |         |    |     |     |         |    |     |     |         |    |     |     |                        |  |  |  |  |  |  |  |  |  |  |  |  |  |  |  |  |      |       |       |      |      |       |       |      |      |       |       |      |      |       |       |      |      |           |       |       |      |      |        |       |      |      |       |       |      |             |        |       |      |      |                |       |       |      |      |       |       |      |      |       |       |      |      |       |       |      |      |             |       |       |        |                  |        |       |        |                  |        |       |        |                  |        |       |        |                  |     |        |       |      |      |        |       |      |      |        |       |      |      |       |       |      |      |                |        |       |      |      |        |       |      |      |        |       |      |      |        |       |      |      |
| <table border="1" style="width: 100%; border-collapse: collapse;"> <thead> <tr> <th rowspan="2"></th> <th colspan="4">FA</th> <th colspan="4">MD</th> <th colspan="4">AD</th> <th colspan="4">RD</th> </tr> <tr> <th><math>\beta</math></th> <th>SE</th> <th><math>p</math></th> <th><math>q</math></th> <th><math>\beta</math></th> <th>SE</th> <th><math>p</math></th> <th><math>q</math></th> <th><math>\beta</math></th> <th>SE</th> <th><math>p</math></th> <th><math>q</math></th> <th><math>\beta</math></th> <th>SE</th> <th><math>p</math></th> <th><math>q</math></th> </tr> </thead> <tbody> <tr> <td colspan="17"><b>Corpus Callosum</b></td> </tr> <tr> <td>IL-8</td> <td>0.001</td> <td>0.002</td> <td>0.99</td> <td>0.99</td> <td>0.008</td> <td>0.002</td> <td>0.90</td> <td>0.95</td> <td>0.024</td> <td>0.003</td> <td>0.74</td> <td>0.90</td> <td>0.018</td> <td>0.003</td> <td>0.77</td> <td>0.98</td> </tr> <tr> <td>SES group</td> <td>0.094</td> <td>0.003</td> <td>0.07</td> <td>0.20</td> <td>-0.012</td> <td>0.003</td> <td>0.82</td> <td>0.82</td> <td>0.151</td> <td>0.004</td> <td>0.01</td> <td><b>0.02</b></td> <td>-0.056</td> <td>0.004</td> <td>0.26</td> <td>0.26</td> </tr> <tr> <td>GA at delivery</td> <td>0.038</td> <td>0.001</td> <td>0.50</td> <td>0.64</td> <td>0.051</td> <td>0.001</td> <td>0.35</td> <td>0.52</td> <td>0.095</td> <td>0.001</td> <td>0.13</td> <td>0.40</td> <td>0.024</td> <td>0.002</td> <td>0.65</td> <td>0.94</td> </tr> <tr> <td>PMA at scan</td> <td>0.468</td> <td>0.001</td> <td>&lt;0.001</td> <td><b>&lt;0.001</b></td> <td>-0.576</td> <td>0.001</td> <td>&lt;0.001</td> <td><b>&lt;0.001</b></td> <td>-0.224</td> <td>0.001</td> <td>&lt;0.001</td> <td><b>&lt;0.001</b></td> <td>-0.567</td> <td>0.002</td> <td>&lt;0.001</td> <td><b>&lt;0.001</b></td> </tr> <tr> <td>Sex</td> <td>-0.084</td> <td>0.003</td> <td>0.09</td> <td>0.24</td> <td>-0.014</td> <td>0.003</td> <td>0.77</td> <td>0.77</td> <td>-0.095</td> <td>0.003</td> <td>0.10</td> <td>0.13</td> <td>0.040</td> <td>0.004</td> <td>0.41</td> <td>0.76</td> </tr> <tr> <td>IL-8:SES group</td> <td>-0.020</td> <td>0.004</td> <td>0.76</td> <td>0.98</td> <td>-0.037</td> <td>0.004</td> <td>0.56</td> <td>0.94</td> <td>-0.072</td> <td>0.004</td> <td>0.33</td> <td>0.63</td> <td>-0.026</td> <td>0.005</td> <td>0.67</td> <td>0.87</td> </tr> </tbody> </table> |         |       |        |                  |         |       |        |                  |         |       |        |                  |         |       |        |                  |  | FA |  |  |  | MD |  |  |  | AD |  |  |  | RD |  |  |  | $\beta$ | SE | $p$ | $q$ | $\beta$ | SE | $p$ | $q$ | $\beta$ | SE | $p$ | $q$ | $\beta$ | SE | $p$ | $q$ | <b>Corpus Callosum</b> |  |  |  |  |  |  |  |  |  |  |  |  |  |  |  |  | IL-8 | 0.001 | 0.002 | 0.99 | 0.99 | 0.008 | 0.002 | 0.90 | 0.95 | 0.024 | 0.003 | 0.74 | 0.90 | 0.018 | 0.003 | 0.77 | 0.98 | SES group | 0.094 | 0.003 | 0.07 | 0.20 | -0.012 | 0.003 | 0.82 | 0.82 | 0.151 | 0.004 | 0.01 | <b>0.02</b> | -0.056 | 0.004 | 0.26 | 0.26 | GA at delivery | 0.038 | 0.001 | 0.50 | 0.64 | 0.051 | 0.001 | 0.35 | 0.52 | 0.095 | 0.001 | 0.13 | 0.40 | 0.024 | 0.002 | 0.65 | 0.94 | PMA at scan | 0.468 | 0.001 | <0.001 | <b>&lt;0.001</b> | -0.576 | 0.001 | <0.001 | <b>&lt;0.001</b> | -0.224 | 0.001 | <0.001 | <b>&lt;0.001</b> | -0.567 | 0.002 | <0.001 | <b>&lt;0.001</b> | Sex | -0.084 | 0.003 | 0.09 | 0.24 | -0.014 | 0.003 | 0.77 | 0.77 | -0.095 | 0.003 | 0.10 | 0.13 | 0.040 | 0.004 | 0.41 | 0.76 | IL-8:SES group | -0.020 | 0.004 | 0.76 | 0.98 | -0.037 | 0.004 | 0.56 | 0.94 | -0.072 | 0.004 | 0.33 | 0.63 | -0.026 | 0.005 | 0.67 | 0.87 |
|                                                                                                                                                                                                                                                                                                                                                                                                                                                                                                                                                                                                                                                                                                                                                                                                                                                                                                                                                                                                                                                                                                                                                                                                                                                                                                                                                                                                                                                                                                                                                                                                                                                                                                                                                                                                                                                                                                                                                                                                                                                                                                                                                                                                                                                                                                                                                                                                               | FA      |       |        |                  | MD      |       |        |                  | AD      |       |        |                  | RD      |       |        |                  |  |    |  |  |  |    |  |  |  |    |  |  |  |    |  |  |  |         |    |     |     |         |    |     |     |         |    |     |     |         |    |     |     |                        |  |  |  |  |  |  |  |  |  |  |  |  |  |  |  |  |      |       |       |      |      |       |       |      |      |       |       |      |      |       |       |      |      |           |       |       |      |      |        |       |      |      |       |       |      |             |        |       |      |      |                |       |       |      |      |       |       |      |      |       |       |      |      |       |       |      |      |             |       |       |        |                  |        |       |        |                  |        |       |        |                  |        |       |        |                  |     |        |       |      |      |        |       |      |      |        |       |      |      |       |       |      |      |                |        |       |      |      |        |       |      |      |        |       |      |      |        |       |      |      |
|                                                                                                                                                                                                                                                                                                                                                                                                                                                                                                                                                                                                                                                                                                                                                                                                                                                                                                                                                                                                                                                                                                                                                                                                                                                                                                                                                                                                                                                                                                                                                                                                                                                                                                                                                                                                                                                                                                                                                                                                                                                                                                                                                                                                                                                                                                                                                                                                               | $\beta$ | SE    | $p$    | $q$              | $\beta$ | SE    | $p$    | $q$              | $\beta$ | SE    | $p$    | $q$              | $\beta$ | SE    | $p$    | $q$              |  |    |  |  |  |    |  |  |  |    |  |  |  |    |  |  |  |         |    |     |     |         |    |     |     |         |    |     |     |         |    |     |     |                        |  |  |  |  |  |  |  |  |  |  |  |  |  |  |  |  |      |       |       |      |      |       |       |      |      |       |       |      |      |       |       |      |      |           |       |       |      |      |        |       |      |      |       |       |      |             |        |       |      |      |                |       |       |      |      |       |       |      |      |       |       |      |      |       |       |      |      |             |       |       |        |                  |        |       |        |                  |        |       |        |                  |        |       |        |                  |     |        |       |      |      |        |       |      |      |        |       |      |      |       |       |      |      |                |        |       |      |      |        |       |      |      |        |       |      |      |        |       |      |      |
| <b>Corpus Callosum</b>                                                                                                                                                                                                                                                                                                                                                                                                                                                                                                                                                                                                                                                                                                                                                                                                                                                                                                                                                                                                                                                                                                                                                                                                                                                                                                                                                                                                                                                                                                                                                                                                                                                                                                                                                                                                                                                                                                                                                                                                                                                                                                                                                                                                                                                                                                                                                                                        |         |       |        |                  |         |       |        |                  |         |       |        |                  |         |       |        |                  |  |    |  |  |  |    |  |  |  |    |  |  |  |    |  |  |  |         |    |     |     |         |    |     |     |         |    |     |     |         |    |     |     |                        |  |  |  |  |  |  |  |  |  |  |  |  |  |  |  |  |      |       |       |      |      |       |       |      |      |       |       |      |      |       |       |      |      |           |       |       |      |      |        |       |      |      |       |       |      |             |        |       |      |      |                |       |       |      |      |       |       |      |      |       |       |      |      |       |       |      |      |             |       |       |        |                  |        |       |        |                  |        |       |        |                  |        |       |        |                  |     |        |       |      |      |        |       |      |      |        |       |      |      |       |       |      |      |                |        |       |      |      |        |       |      |      |        |       |      |      |        |       |      |      |
| IL-8                                                                                                                                                                                                                                                                                                                                                                                                                                                                                                                                                                                                                                                                                                                                                                                                                                                                                                                                                                                                                                                                                                                                                                                                                                                                                                                                                                                                                                                                                                                                                                                                                                                                                                                                                                                                                                                                                                                                                                                                                                                                                                                                                                                                                                                                                                                                                                                                          | 0.001   | 0.002 | 0.99   | 0.99             | 0.008   | 0.002 | 0.90   | 0.95             | 0.024   | 0.003 | 0.74   | 0.90             | 0.018   | 0.003 | 0.77   | 0.98             |  |    |  |  |  |    |  |  |  |    |  |  |  |    |  |  |  |         |    |     |     |         |    |     |     |         |    |     |     |         |    |     |     |                        |  |  |  |  |  |  |  |  |  |  |  |  |  |  |  |  |      |       |       |      |      |       |       |      |      |       |       |      |      |       |       |      |      |           |       |       |      |      |        |       |      |      |       |       |      |             |        |       |      |      |                |       |       |      |      |       |       |      |      |       |       |      |      |       |       |      |      |             |       |       |        |                  |        |       |        |                  |        |       |        |                  |        |       |        |                  |     |        |       |      |      |        |       |      |      |        |       |      |      |       |       |      |      |                |        |       |      |      |        |       |      |      |        |       |      |      |        |       |      |      |
| SES group                                                                                                                                                                                                                                                                                                                                                                                                                                                                                                                                                                                                                                                                                                                                                                                                                                                                                                                                                                                                                                                                                                                                                                                                                                                                                                                                                                                                                                                                                                                                                                                                                                                                                                                                                                                                                                                                                                                                                                                                                                                                                                                                                                                                                                                                                                                                                                                                     | 0.094   | 0.003 | 0.07   | 0.20             | -0.012  | 0.003 | 0.82   | 0.82             | 0.151   | 0.004 | 0.01   | <b>0.02</b>      | -0.056  | 0.004 | 0.26   | 0.26             |  |    |  |  |  |    |  |  |  |    |  |  |  |    |  |  |  |         |    |     |     |         |    |     |     |         |    |     |     |         |    |     |     |                        |  |  |  |  |  |  |  |  |  |  |  |  |  |  |  |  |      |       |       |      |      |       |       |      |      |       |       |      |      |       |       |      |      |           |       |       |      |      |        |       |      |      |       |       |      |             |        |       |      |      |                |       |       |      |      |       |       |      |      |       |       |      |      |       |       |      |      |             |       |       |        |                  |        |       |        |                  |        |       |        |                  |        |       |        |                  |     |        |       |      |      |        |       |      |      |        |       |      |      |       |       |      |      |                |        |       |      |      |        |       |      |      |        |       |      |      |        |       |      |      |
| GA at delivery                                                                                                                                                                                                                                                                                                                                                                                                                                                                                                                                                                                                                                                                                                                                                                                                                                                                                                                                                                                                                                                                                                                                                                                                                                                                                                                                                                                                                                                                                                                                                                                                                                                                                                                                                                                                                                                                                                                                                                                                                                                                                                                                                                                                                                                                                                                                                                                                | 0.038   | 0.001 | 0.50   | 0.64             | 0.051   | 0.001 | 0.35   | 0.52             | 0.095   | 0.001 | 0.13   | 0.40             | 0.024   | 0.002 | 0.65   | 0.94             |  |    |  |  |  |    |  |  |  |    |  |  |  |    |  |  |  |         |    |     |     |         |    |     |     |         |    |     |     |         |    |     |     |                        |  |  |  |  |  |  |  |  |  |  |  |  |  |  |  |  |      |       |       |      |      |       |       |      |      |       |       |      |      |       |       |      |      |           |       |       |      |      |        |       |      |      |       |       |      |             |        |       |      |      |                |       |       |      |      |       |       |      |      |       |       |      |      |       |       |      |      |             |       |       |        |                  |        |       |        |                  |        |       |        |                  |        |       |        |                  |     |        |       |      |      |        |       |      |      |        |       |      |      |       |       |      |      |                |        |       |      |      |        |       |      |      |        |       |      |      |        |       |      |      |
| PMA at scan                                                                                                                                                                                                                                                                                                                                                                                                                                                                                                                                                                                                                                                                                                                                                                                                                                                                                                                                                                                                                                                                                                                                                                                                                                                                                                                                                                                                                                                                                                                                                                                                                                                                                                                                                                                                                                                                                                                                                                                                                                                                                                                                                                                                                                                                                                                                                                                                   | 0.468   | 0.001 | <0.001 | <b>&lt;0.001</b> | -0.576  | 0.001 | <0.001 | <b>&lt;0.001</b> | -0.224  | 0.001 | <0.001 | <b>&lt;0.001</b> | -0.567  | 0.002 | <0.001 | <b>&lt;0.001</b> |  |    |  |  |  |    |  |  |  |    |  |  |  |    |  |  |  |         |    |     |     |         |    |     |     |         |    |     |     |         |    |     |     |                        |  |  |  |  |  |  |  |  |  |  |  |  |  |  |  |  |      |       |       |      |      |       |       |      |      |       |       |      |      |       |       |      |      |           |       |       |      |      |        |       |      |      |       |       |      |             |        |       |      |      |                |       |       |      |      |       |       |      |      |       |       |      |      |       |       |      |      |             |       |       |        |                  |        |       |        |                  |        |       |        |                  |        |       |        |                  |     |        |       |      |      |        |       |      |      |        |       |      |      |       |       |      |      |                |        |       |      |      |        |       |      |      |        |       |      |      |        |       |      |      |
| Sex                                                                                                                                                                                                                                                                                                                                                                                                                                                                                                                                                                                                                                                                                                                                                                                                                                                                                                                                                                                                                                                                                                                                                                                                                                                                                                                                                                                                                                                                                                                                                                                                                                                                                                                                                                                                                                                                                                                                                                                                                                                                                                                                                                                                                                                                                                                                                                                                           | -0.084  | 0.003 | 0.09   | 0.24             | -0.014  | 0.003 | 0.77   | 0.77             | -0.095  | 0.003 | 0.10   | 0.13             | 0.040   | 0.004 | 0.41   | 0.76             |  |    |  |  |  |    |  |  |  |    |  |  |  |    |  |  |  |         |    |     |     |         |    |     |     |         |    |     |     |         |    |     |     |                        |  |  |  |  |  |  |  |  |  |  |  |  |  |  |  |  |      |       |       |      |      |       |       |      |      |       |       |      |      |       |       |      |      |           |       |       |      |      |        |       |      |      |       |       |      |             |        |       |      |      |                |       |       |      |      |       |       |      |      |       |       |      |      |       |       |      |      |             |       |       |        |                  |        |       |        |                  |        |       |        |                  |        |       |        |                  |     |        |       |      |      |        |       |      |      |        |       |      |      |       |       |      |      |                |        |       |      |      |        |       |      |      |        |       |      |      |        |       |      |      |
| IL-8:SES group                                                                                                                                                                                                                                                                                                                                                                                                                                                                                                                                                                                                                                                                                                                                                                                                                                                                                                                                                                                                                                                                                                                                                                                                                                                                                                                                                                                                                                                                                                                                                                                                                                                                                                                                                                                                                                                                                                                                                                                                                                                                                                                                                                                                                                                                                                                                                                                                | -0.020  | 0.004 | 0.76   | 0.98             | -0.037  | 0.004 | 0.56   | 0.94             | -0.072  | 0.004 | 0.33   | 0.63             | -0.026  | 0.005 | 0.67   | 0.87             |  |    |  |  |  |    |  |  |  |    |  |  |  |    |  |  |  |         |    |     |     |         |    |     |     |         |    |     |     |         |    |     |     |                        |  |  |  |  |  |  |  |  |  |  |  |  |  |  |  |  |      |       |       |      |      |       |       |      |      |       |       |      |      |       |       |      |      |           |       |       |      |      |        |       |      |      |       |       |      |             |        |       |      |      |                |       |       |      |      |       |       |      |      |       |       |      |      |       |       |      |      |             |       |       |        |                  |        |       |        |                  |        |       |        |                  |        |       |        |                  |     |        |       |      |      |        |       |      |      |        |       |      |      |       |       |      |      |                |        |       |      |      |        |       |      |      |        |       |      |      |        |       |      |      |
| <b>Superior Cingulum Bundle</b>                                                                                                                                                                                                                                                                                                                                                                                                                                                                                                                                                                                                                                                                                                                                                                                                                                                                                                                                                                                                                                                                                                                                                                                                                                                                                                                                                                                                                                                                                                                                                                                                                                                                                                                                                                                                                                                                                                                                                                                                                                                                                                                                                                                                                                                                                                                                                                               |         |       |        |                  |         |       |        |                  |         |       |        |                  |         |       |        |                  |  |    |  |  |  |    |  |  |  |    |  |  |  |    |  |  |  |         |    |     |     |         |    |     |     |         |    |     |     |         |    |     |     |                        |  |  |  |  |  |  |  |  |  |  |  |  |  |  |  |  |      |       |       |      |      |       |       |      |      |       |       |      |      |       |       |      |      |           |       |       |      |      |        |       |      |      |       |       |      |             |        |       |      |      |                |       |       |      |      |       |       |      |      |       |       |      |      |       |       |      |      |             |       |       |        |                  |        |       |        |                  |        |       |        |                  |        |       |        |                  |     |        |       |      |      |        |       |      |      |        |       |      |      |       |       |      |      |                |        |       |      |      |        |       |      |      |        |       |      |      |        |       |      |      |

|                                             |        |       |        |                  |        |       |        |                  |        |       |        |                  |        |       |        |                  |
|---------------------------------------------|--------|-------|--------|------------------|--------|-------|--------|------------------|--------|-------|--------|------------------|--------|-------|--------|------------------|
| IL-8                                        | -0.058 | 0.002 | 0.41   | 0.77             | 0.059  | 0.003 | 0.36   | 0.95             | 0.015  | 0.004 | 0.83   | 0.90             | 0.074  | 0.004 | 0.25   | 0.98             |
| SES group                                   | -0.151 | 0.003 | 0.01   | 0.06             | 0.156  | 0.005 | <0.01  | <b>&lt;0.01</b>  | 0.056  | 0.005 | 0.30   | 0.30             | 0.177  | 0.005 | <0.01  | <b>&lt;0.01</b>  |
| GA at delivery                              | 0.127  | 0.001 | 0.03   | 0.08             | -0.046 | 0.002 | 0.41   | 0.52             | 0.030  | 0.002 | 0.61   | 0.80             | -0.076 | 0.002 | 0.17   | 0.31             |
| PMA at scan                                 | 0.314  | 0.001 | <0.001 | <b>&lt;0.001</b> | -0.504 | 0.002 | <0.001 | <b>&lt;0.001</b> | -0.402 | 0.002 | <0.001 | <b>&lt;0.001</b> | -0.479 | 0.002 | <0.001 | <b>&lt;0.001</b> |
| Sex                                         | -0.098 | 0.003 | 0.07   | 0.24             | -0.043 | 0.004 | 0.39   | 0.55             | -0.134 | 0.005 | 0.01   | <b>0.03</b>      | 0.003  | 0.005 | 0.94   | 0.94             |
| IL-8:SES group                              | 0.080  | 0.003 | 0.25   | 0.75             | -0.051 | 0.005 | 0.43   | 0.94             | 0.012  | 0.006 | 0.86   | 0.86             | -0.075 | 0.006 | 0.24   | 0.87             |
| <b>Corticospinal Tract</b>                  |        |       |        |                  |        |       |        |                  |        |       |        |                  |        |       |        |                  |
| IL-8                                        | 0.028  | 0.002 | 0.66   | 0.77             | 0.021  | 0.003 | 0.70   | 0.95             | 0.046  | 0.003 | 0.43   | 0.90             | 0.009  | 0.004 | 0.87   | 0.98             |
| SES group                                   | 0.036  | 0.003 | 0.47   | 0.70             | 0.111  | 0.004 | 0.01   | <b>0.02</b>      | 0.220  | 0.004 | <0.001 | <b>&lt;0.001</b> | 0.066  | 0.005 | 0.13   | 0.15             |
| GA at delivery                              | 0.041  | 0.001 | 0.44   | 0.64             | 0.021  | 0.002 | 0.64   | 0.72             | 0.059  | 0.001 | 0.23   | 0.53             | 0.004  | 0.002 | 0.94   | 1.00             |
| PMA at scan                                 | 0.538  | 0.001 | <0.001 | <b>&lt;0.001</b> | -0.709 | 0.002 | <0.001 | <b>&lt;0.001</b> | -0.642 | 0.001 | <0.001 | <b>&lt;0.001</b> | -0.683 | 0.002 | <0.001 | <b>&lt;0.001</b> |
| Sex                                         | -0.009 | 0.003 | 0.85   | 0.92             | -0.049 | 0.004 | 0.25   | 0.44             | -0.084 | 0.003 | 0.06   | 0.09             | -0.035 | 0.005 | 0.42   | 0.76             |
| IL-8:SES group                              | -0.089 | 0.004 | 0.15   | 0.75             | 0.006  | 0.005 | 0.91   | 0.94             | -0.076 | 0.004 | 0.19   | 0.63             | 0.033  | 0.006 | 0.55   | 0.87             |
| <b>Optic Radiation</b>                      |        |       |        |                  |        |       |        |                  |        |       |        |                  |        |       |        |                  |
| IL-8                                        | 0.027  | 0.002 | 0.67   | 0.77             | 0.043  | 0.004 | 0.46   | 0.95             | 0.047  | 0.004 | 0.48   | 0.90             | 0.024  | 0.004 | 0.68   | 0.98             |
| SES group                                   | 0.073  | 0.003 | 0.14   | 0.33             | 0.176  | 0.005 | <0.001 | <b>&lt;0.01</b>  | 0.301  | 0.005 | <0.001 | <b>&lt;0.001</b> | 0.115  | 0.006 | 0.01   | <b>0.02</b>      |
| GA at delivery                              | 0.014  | 0.001 | 0.80   | 0.80             | -0.106 | 0.002 | 0.04   | 0.31             | -0.124 | 0.002 | 0.03   | 0.14             | -0.088 | 0.002 | 0.08   | 0.17             |
| PMA at scan                                 | 0.530  | 0.001 | <0.001 | <b>&lt;0.001</b> | -0.568 | 0.002 | <0.001 | <b>&lt;0.001</b> | -0.312 | 0.002 | <0.001 | <b>&lt;0.001</b> | -0.602 | 0.002 | <0.001 | <b>&lt;0.001</b> |
| Sex                                         | 0.005  | 0.003 | 0.92   | 0.92             | -0.127 | 0.005 | 0.01   | <b>0.04</b>      | -0.190 | 0.005 | <0.001 | <b>&lt;0.01</b>  | -0.097 | 0.006 | 0.03   | 0.15             |
| IL-8:SES group                              | -0.045 | 0.004 | 0.48   | 0.98             | -0.021 | 0.006 | 0.73   | 0.94             | -0.043 | 0.006 | 0.51   | 0.66             | -0.002 | 0.007 | 0.97   | 0.97             |
| <b>Uncinate Fasciculus</b>                  |        |       |        |                  |        |       |        |                  |        |       |        |                  |        |       |        |                  |
| IL-8                                        | 0.059  | 0.002 | 0.35   | 0.77             | 0.004  | 0.003 | 0.95   | 0.95             | 0.044  | 0.004 | 0.54   | 0.90             | -0.017 | 0.003 | 0.78   | 0.98             |
| SES group                                   | -0.039 | 0.003 | 0.44   | 0.70             | 0.139  | 0.004 | 0.01   | <b>0.01</b>      | 0.125  | 0.005 | 0.03   | <b>0.04</b>      | 0.123  | 0.004 | 0.01   | <b>0.02</b>      |
| GA at delivery                              | 0.135  | 0.001 | 0.01   | 0.06             | 0.063  | 0.002 | 0.24   | 0.51             | 0.172  | 0.002 | 0.01   | 0.05             | 0.000  | 0.002 | 1.00   | 1.00             |
| PMA at scan                                 | 0.493  | 0.001 | <0.001 | <b>&lt;0.001</b> | -0.570 | 0.001 | <0.001 | <b>&lt;0.001</b> | -0.290 | 0.002 | <0.001 | <b>&lt;0.001</b> | -0.617 | 0.002 | <0.001 | <b>&lt;0.001</b> |
| Sex                                         | -0.079 | 0.002 | 0.11   | 0.24             | -0.068 | 0.004 | 0.16   | 0.37             | -0.135 | 0.005 | 0.02   | <b>0.03</b>      | -0.030 | 0.004 | 0.52   | 0.76             |
| IL-8:SES group                              | 0.002  | 0.003 | 0.98   | 0.98             | -0.095 | 0.005 | 0.13   | 0.94             | -0.106 | 0.006 | 0.14   | 0.63             | -0.075 | 0.005 | 0.21   | 0.87             |
| <b>Inferior Fronto-Occipital Fasciculus</b> |        |       |        |                  |        |       |        |                  |        |       |        |                  |        |       |        |                  |
| IL-8                                        | 0.023  | 0.002 | 0.68   | 0.77             | 0.013  | 0.004 | 0.81   | 0.95             | 0.051  | 0.003 | 0.43   | 0.90             | 0.001  | 0.004 | 0.99   | 0.98             |
| SES group                                   | -0.002 | 0.003 | 0.96   | 0.96             | 0.131  | 0.005 | <0.01  | <b>0.01</b>      | 0.239  | 0.004 | <0.001 | <b>&lt;0.001</b> | 0.095  | 0.006 | 0.03   | <b>0.04</b>      |
| GA at delivery                              | 0.141  | 0.001 | <0.01  | <b>0.04</b>      | -0.082 | 0.002 | 0.08   | 0.31             | 0.023  | 0.001 | 0.69   | 0.80             | -0.105 | 0.002 | 0.03   | 0.17             |
| PMA at scan                                 | 0.595  | 0.001 | <0.001 | <b>&lt;0.001</b> | -0.644 | 0.002 | <0.001 | <b>&lt;0.001</b> | -0.461 | 0.001 | <0.001 | <b>&lt;0.001</b> | -0.648 | 0.002 | <0.001 | <b>&lt;0.001</b> |
| Sex                                         | 0.005  | 0.003 | 0.91   | 0.92             | -0.109 | 0.005 | 0.01   | <b>0.04</b>      | -0.174 | 0.004 | <0.01  | <b>&lt;0.01</b>  | -0.077 | 0.006 | 0.07   | 0.21             |
| IL-8:SES group                              | -0.005 | 0.004 | 0.94   | 0.98             | -0.033 | 0.006 | 0.55   | 0.94             | -0.061 | 0.004 | 0.35   | 0.63             | -0.023 | 0.007 | 0.68   | 0.87             |
| <b>Anterior Limb of Internal Capsule</b>    |        |       |        |                  |        |       |        |                  |        |       |        |                  |        |       |        |                  |

|                |        |       |        |                  |        |       |        |                  |        |       |        |                  |        |       |        |                  |
|----------------|--------|-------|--------|------------------|--------|-------|--------|------------------|--------|-------|--------|------------------|--------|-------|--------|------------------|
| IL-8           | -0.036 | 0.002 | 0.53   | 0.77             | 0.034  | 0.004 | 0.57   | 0.95             | -0.010 | 0.004 | 0.88   | 0.90             | 0.039  | 0.005 | 0.51   | 0.98             |
| SES group      | 0.013  | 0.003 | 0.77   | 0.87             | 0.119  | 0.006 | 0.01   | <b>0.02</b>      | 0.176  | 0.005 | <0.01  | <b>&lt;0.01</b>  | 0.093  | 0.007 | 0.04   | 0.06             |
| GA at delivery | 0.114  | 0.001 | 0.02   | 0.06             | -0.084 | 0.002 | 0.10   | 0.31             | -0.021 | 0.002 | 0.71   | 0.80             | -0.098 | 0.002 | 0.05   | 0.17             |
| PMA at scan    | 0.594  | 0.001 | <0.001 | <b>&lt;0.001</b> | -0.579 | 0.002 | <0.001 | <b>&lt;0.001</b> | -0.443 | 0.002 | <0.001 | <b>&lt;0.001</b> | -0.601 | 0.002 | <0.001 | <b>&lt;0.001</b> |
| Sex            | -0.029 | 0.002 | 0.51   | 0.92             | -0.037 | 0.006 | 0.43   | 0.55             | -0.060 | 0.005 | 0.25   | 0.25             | -0.024 | 0.006 | 0.59   | 0.76             |
| IL-8:SES group | 0.014  | 0.003 | 0.80   | 0.98             | -0.048 | 0.007 | 0.43   | 0.94             | -0.044 | 0.006 | 0.52   | 0.66             | -0.042 | 0.008 | 0.47   | 0.87             |

**Inferior Cingulum Bundle**

|                |        |       |        |                  |        |       |        |                  |        |       |        |                  |        |       |        |                  |
|----------------|--------|-------|--------|------------------|--------|-------|--------|------------------|--------|-------|--------|------------------|--------|-------|--------|------------------|
| IL-8           | -0.070 | 0.002 | 0.32   | 0.77             | -0.024 | 0.002 | 0.69   | 0.95             | -0.075 | 0.003 | 0.29   | 0.90             | 0.009  | 0.002 | 0.87   | 0.98             |
| SES group      | -0.027 | 0.002 | 0.62   | 0.80             | 0.201  | 0.003 | <0.001 | <b>&lt;0.001</b> | 0.187  | 0.004 | <0.01  | <b>&lt;0.01</b>  | 0.159  | 0.003 | <0.01  | <b>&lt;0.01</b>  |
| GA at delivery | -0.106 | 0.001 | 0.08   | 0.14             | 0.055  | 0.001 | 0.28   | 0.51             | -0.042 | 0.001 | 0.49   | 0.80             | 0.096  | 0.001 | 0.06   | 0.17             |
| PMA at scan    | 0.421  | 0.001 | <0.001 | <b>&lt;0.001</b> | -0.619 | 0.001 | <0.001 | <b>&lt;0.001</b> | -0.330 | 0.001 | <0.001 | <b>&lt;0.001</b> | -0.644 | 0.001 | <0.001 | <b>&lt;0.001</b> |
| Sex            | -0.007 | 0.002 | 0.90   | 0.92             | -0.120 | 0.003 | 0.01   | <b>0.04</b>      | -0.113 | 0.003 | 0.04   | 0.07             | -0.103 | 0.003 | 0.03   | 0.15             |
| IL-8:SES group | 0.090  | 0.003 | 0.19   | 0.75             | 0.013  | 0.003 | 0.82   | 0.94             | 0.073  | 0.004 | 0.29   | 0.63             | -0.026 | 0.003 | 0.66   | 0.87             |

**Fornix**

|                |        |       |        |                  |        |       |        |                  |        |       |        |                  |        |       |        |                  |
|----------------|--------|-------|--------|------------------|--------|-------|--------|------------------|--------|-------|--------|------------------|--------|-------|--------|------------------|
| IL-8           | -0.036 | 0.001 | 0.61   | 0.77             | 0.024  | 0.002 | 0.68   | 0.95             | -0.008 | 0.003 | 0.90   | 0.90             | 0.039  | 0.002 | 0.51   | 0.98             |
| SES group      | -0.107 | 0.002 | 0.05   | 0.20             | 0.113  | 0.003 | 0.02   | <b>0.02</b>      | 0.072  | 0.004 | 0.17   | 0.19             | 0.127  | 0.003 | 0.01   | <b>0.02</b>      |
| GA at delivery | 0.022  | 0.001 | 0.72   | 0.80             | -0.011 | 0.001 | 0.83   | 0.83             | 0.005  | 0.001 | 0.93   | 0.93             | -0.017 | 0.001 | 0.73   | 0.94             |
| PMA at scan    | 0.353  | 0.001 | <0.001 | <b>&lt;0.001</b> | -0.632 | 0.001 | <0.001 | <b>&lt;0.001</b> | -0.492 | 0.001 | <0.001 | <b>&lt;0.001</b> | -0.638 | 0.001 | <0.001 | <b>&lt;0.001</b> |
| Sex            | -0.092 | 0.002 | 0.09   | 0.24             | -0.030 | 0.003 | 0.51   | 0.57             | -0.079 | 0.004 | 0.12   | 0.14             | 0.004  | 0.003 | 0.92   | 0.94             |
| IL-8:SES group | 0.009  | 0.002 | 0.90   | 0.98             | 0.004  | 0.003 | 0.94   | 0.94             | 0.018  | 0.005 | 0.78   | 0.86             | -0.004 | 0.003 | 0.95   | 0.97             |

**IL-10**

|  | FA      |    |     |     | MD      |    |     |     | AD      |    |     |     | RD      |    |     |     |
|--|---------|----|-----|-----|---------|----|-----|-----|---------|----|-----|-----|---------|----|-----|-----|
|  | $\beta$ | SE | $p$ | $q$ | $\beta$ | SE | $p$ | $q$ | $\beta$ | SE | $p$ | $q$ | $\beta$ | SE | $p$ | $q$ |

**Corpus Callosum**

|                 |        |       |        |                  |        |       |        |                  |        |       |        |                  |        |       |        |                  |
|-----------------|--------|-------|--------|------------------|--------|-------|--------|------------------|--------|-------|--------|------------------|--------|-------|--------|------------------|
| IL-10           | -0.065 | 0.002 | 0.32   | 0.36             | 0.050  | 0.002 | 0.43   | 0.55             | -0.075 | 0.003 | 0.32   | 0.57             | 0.067  | 0.003 | 0.28   | 0.51             |
| SES group       | 0.101  | 0.003 | 0.05   | 0.18             | -0.011 | 0.003 | 0.82   | 0.82             | 0.160  | 0.004 | 0.01   | <b>0.01</b>      | -0.063 | 0.004 | 0.20   | 0.20             |
| GA at delivery  | 0.041  | 0.001 | 0.46   | 0.68             | 0.048  | 0.001 | 0.37   | 0.56             | 0.090  | 0.001 | 0.16   | 0.48             | 0.027  | 0.002 | 0.61   | 0.86             |
| PMA at scan     | 0.475  | 0.001 | <0.001 | <b>&lt;0.001</b> | -0.573 | 0.001 | <0.001 | <b>&lt;0.001</b> | -0.210 | 0.001 | <0.001 | <b>&lt;0.001</b> | -0.576 | 0.002 | <0.001 | <b>&lt;0.001</b> |
| Sex             | -0.091 | 0.003 | 0.07   | 0.32             | -0.006 | 0.003 | 0.89   | 0.89             | -0.092 | 0.003 | 0.11   | 0.14             | 0.042  | 0.004 | 0.38   | 0.73             |
| IL-10:SES group | -0.021 | 0.004 | 0.74   | 0.92             | 0.054  | 0.004 | 0.40   | 0.78             | 0.109  | 0.004 | 0.15   | 0.79             | 0.032  | 0.005 | 0.61   | 0.81             |

**Superior Cingulum Bundle**

|                 |        |       |        |                  |        |       |        |                  |        |       |        |                  |        |       |        |                  |
|-----------------|--------|-------|--------|------------------|--------|-------|--------|------------------|--------|-------|--------|------------------|--------|-------|--------|------------------|
| IL-10           | -0.113 | 0.002 | 0.11   | 0.18             | 0.084  | 0.003 | 0.20   | 0.45             | 0.034  | 0.004 | 0.63   | 0.71             | 0.103  | 0.004 | 0.12   | 0.27             |
| SES group       | -0.152 | 0.003 | 0.01   | 0.06             | 0.161  | 0.005 | <0.01  | <b>0.01</b>      | 0.061  | 0.005 | 0.27   | 0.27             | 0.181  | 0.005 | <0.001 | <b>&lt;0.01</b>  |
| GA at delivery  | 0.120  | 0.001 | 0.05   | 0.10             | -0.043 | 0.002 | 0.44   | 0.57             | 0.030  | 0.002 | 0.61   | 0.81             | -0.069 | 0.002 | 0.21   | 0.39             |
| PMA at scan     | 0.319  | 0.001 | <0.001 | <b>&lt;0.001</b> | -0.500 | 0.002 | <0.001 | <b>&lt;0.001</b> | -0.394 | 0.002 | <0.001 | <b>&lt;0.001</b> | -0.480 | 0.002 | <0.001 | <b>&lt;0.001</b> |
| Sex             | -0.096 | 0.003 | 0.08   | 0.32             | -0.050 | 0.004 | 0.32   | 0.48             | -0.139 | 0.005 | 0.01   | <b>0.03</b>      | -0.004 | 0.005 | 0.93   | 0.76             |
| IL-10:SES group | 0.118  | 0.003 | 0.10   | 0.87             | -0.018 | 0.005 | 0.78   | 0.78             | 0.062  | 0.006 | 0.38   | 0.79             | -0.058 | 0.006 | 0.38   | 0.81             |

| <b>Corticospinal Tract</b>                  |        |       |        |                  |        |       |        |                  |        |       |        |                  |        |       |        |                  |
|---------------------------------------------|--------|-------|--------|------------------|--------|-------|--------|------------------|--------|-------|--------|------------------|--------|-------|--------|------------------|
| IL-10                                       | -0.214 | 0.002 | 0.00   | 0.01             | 0.137  | 0.003 | 0.01   | 0.11             | 0.004  | 0.003 | 0.94   | 0.94             | 0.166  | 0.004 | <0.01  | <b>0.03</b>      |
| SES group                                   | 0.035  | 0.003 | 0.46   | 0.63             | 0.116  | 0.004 | 0.01   | <b>0.01</b>      | 0.225  | 0.004 | <0.001 | <b>&lt;0.001</b> | 0.069  | 0.005 | 0.11   | 0.12             |
| GA at delivery                              | 0.025  | 0.001 | 0.63   | 0.71             | 0.029  | 0.002 | 0.52   | 0.58             | 0.056  | 0.001 | 0.27   | 0.60             | 0.016  | 0.002 | 0.73   | 0.86             |
| PMA at scan                                 | 0.532  | 0.001 | <0.001 | <b>&lt;0.001</b> | -0.701 | 0.001 | <0.001 | <b>&lt;0.001</b> | -0.635 | 0.001 | <0.001 | <b>&lt;0.001</b> | -0.675 | 0.002 | <0.001 | <b>&lt;0.001</b> |
| Sex                                         | -0.008 | 0.003 | 0.86   | 0.99             | -0.047 | 0.004 | 0.26   | 0.46             | -0.081 | 0.003 | 0.08   | 0.11             | -0.034 | 0.005 | 0.42   | 0.62             |
| IL-10:SES group                             | 0.006  | 0.003 | 0.92   | 0.92             | 0.017  | 0.005 | 0.75   | 0.78             | 0.033  | 0.004 | 0.58   | 0.79             | 0.014  | 0.006 | 0.80   | 0.87             |
| <b>Optic Radiation</b>                      |        |       |        |                  |        |       |        |                  |        |       |        |                  |        |       |        |                  |
| IL-10                                       | -0.106 | 0.002 | 0.10   | 0.18             | 0.119  | 0.004 | 0.05   | 0.14             | 0.073  | 0.004 | 0.28   | 0.57             | 0.127  | 0.004 | 0.03   | 0.09             |
| SES group                                   | 0.078  | 0.003 | 0.12   | 0.27             | 0.177  | 0.005 | <0.001 | <b>&lt;0.01</b>  | 0.305  | 0.005 | <0.001 | <b>&lt;0.001</b> | 0.112  | 0.006 | 0.01   | <b>0.03</b>      |
| GA at delivery                              | 0.007  | 0.001 | 0.89   | 0.89             | -0.101 | 0.002 | 0.05   | 0.28             | -0.118 | 0.002 | 0.04   | 0.17             | -0.079 | 0.002 | 0.11   | 0.25             |
| PMA at scan                                 | 0.531  | 0.001 | <0.001 | <b>&lt;0.001</b> | -0.570 | 0.002 | <0.001 | <b>&lt;0.001</b> | -0.313 | 0.002 | <0.001 | <b>&lt;0.001</b> | -0.606 | 0.002 | <0.001 | <b>&lt;0.001</b> |
| Sex                                         | -0.001 | 0.003 | 0.98   | 0.99             | -0.124 | 0.005 | 0.01   | <b>0.03</b>      | -0.191 | 0.005 | <0.001 | <b>&lt;0.01</b>  | -0.095 | 0.006 | 0.03   | 0.16             |
| IL-10:SES group                             | 0.017  | 0.004 | 0.79   | 0.92             | -0.051 | 0.006 | 0.39   | 0.78             | -0.055 | 0.006 | 0.41   | 0.79             | -0.045 | 0.007 | 0.44   | 0.81             |
| <b>Uncinate Fasciculus</b>                  |        |       |        |                  |        |       |        |                  |        |       |        |                  |        |       |        |                  |
| IL-10                                       | -0.035 | 0.002 | 0.59   | 0.59             | -0.066 | 0.003 | 0.31   | 0.55             | -0.103 | 0.004 | 0.15   | 0.55             | -0.041 | 0.003 | 0.51   | 0.65             |
| SES group                                   | -0.041 | 0.003 | 0.42   | 0.63             | 0.142  | 0.004 | <0.001 | <b>0.01</b>      | 0.127  | 0.005 | 0.02   | <b>0.03</b>      | 0.124  | 0.004 | 0.01   | <b>0.02</b>      |
| GA at delivery                              | 0.126  | 0.001 | 0.02   | 0.07             | 0.066  | 0.002 | 0.22   | 0.40             | 0.168  | 0.002 | 0.01   | 0.05             | 0.008  | 0.002 | 0.88   | 0.88             |
| PMA at scan                                 | 0.481  | 0.001 | <0.001 | <b>&lt;0.001</b> | -0.567 | 0.001 | <0.001 | <b>&lt;0.001</b> | -0.293 | 0.002 | <0.001 | <b>&lt;0.001</b> | -0.615 | 0.002 | <0.001 | <b>&lt;0.001</b> |
| Sex                                         | -0.072 | 0.003 | 0.14   | 0.32             | -0.078 | 0.004 | 0.11   | 0.26             | -0.140 | 0.005 | 0.01   | <b>0.03</b>      | -0.042 | 0.004 | 0.37   | 0.62             |
| IL-10:SES group                             | -0.044 | 0.003 | 0.49   | 0.92             | -0.052 | 0.005 | 0.42   | 0.78             | -0.084 | 0.006 | 0.24   | 0.79             | -0.030 | 0.005 | 0.63   | 0.81             |
| <b>Inferior Fronto-Occipital Fasciculus</b> |        |       |        |                  |        |       |        |                  |        |       |        |                  |        |       |        |                  |
| IL-10                                       | -0.089 | 0.002 | 0.12   | 0.18             | 0.030  | 0.004 | 0.59   | 0.66             | -0.038 | 0.003 | 0.56   | 0.71             | 0.049  | 0.004 | 0.38   | 0.57             |
| SES group                                   | 0.000  | 0.003 | 0.99   | 0.99             | 0.134  | 0.005 | <0.01  | <b>0.01</b>      | 0.247  | 0.004 | <0.001 | <b>&lt;0.001</b> | 0.095  | 0.006 | 0.03   | <b>0.04</b>      |
| GA at delivery                              | 0.136  | 0.001 | <0.01  | <b>0.04</b>      | -0.081 | 0.002 | 0.09   | 0.28             | 0.020  | 0.001 | 0.72   | 0.81             | -0.101 | 0.002 | 0.03   | 0.15             |
| PMA at scan                                 | 0.591  | 0.001 | <0.001 | <b>&lt;0.001</b> | -0.638 | 0.002 | <0.001 | <b>&lt;0.001</b> | -0.454 | 0.001 | <0.001 | <b>&lt;0.001</b> | -0.643 | 0.002 | <0.001 | <b>&lt;0.001</b> |
| Sex                                         | 0.000  | 0.003 | 0.99   | 0.99             | -0.110 | 0.005 | 0.01   | <b>0.03</b>      | -0.182 | 0.004 | <0.001 | <b>&lt;0.01</b>  | -0.078 | 0.006 | 0.07   | 0.20             |
| IL-10:SES group                             | -0.037 | 0.004 | 0.51   | 0.92             | 0.032  | 0.006 | 0.57   | 0.78             | 0.017  | 0.004 | 0.80   | 0.79             | 0.038  | 0.007 | 0.49   | 0.81             |
| <b>Anterior Limb of Internal Capsule</b>    |        |       |        |                  |        |       |        |                  |        |       |        |                  |        |       |        |                  |
| IL-10                                       | -0.098 | 0.002 | 0.09   | 0.18             | -0.006 | 0.004 | 0.92   | 0.92             | -0.091 | 0.004 | 0.18   | 0.55             | 0.019  | 0.005 | 0.75   | 0.75             |
| SES group                                   | 0.012  | 0.003 | 0.79   | 0.89             | 0.122  | 0.006 | 0.01   | <b>0.01</b>      | 0.177  | 0.005 | <0.01  | <b>&lt;0.01</b>  | 0.095  | 0.007 | 0.04   | 0.05             |
| GA at delivery                              | 0.111  | 0.001 | 0.02   | 0.07             | -0.087 | 0.002 | 0.09   | 0.28             | -0.025 | 0.002 | 0.67   | 0.81             | -0.099 | 0.003 | 0.05   | 0.15             |
| PMA at scan                                 | 0.594  | 0.001 | <0.001 | <b>&lt;0.001</b> | -0.576 | 0.002 | <0.001 | <b>&lt;0.001</b> | -0.436 | 0.002 | <0.001 | <b>&lt;0.001</b> | -0.599 | 0.002 | <0.001 | <b>&lt;0.001</b> |
| Sex                                         | -0.031 | 0.003 | 0.49   | 0.88             | -0.039 | 0.006 | 0.41   | 0.53             | -0.063 | 0.005 | 0.23   | 0.23             | -0.026 | 0.006 | 0.57   | 0.73             |
| IL-10:SES group                             | 0.021  | 0.003 | 0.72   | 0.92             | 0.018  | 0.007 | 0.77   | 0.78             | 0.047  | 0.006 | 0.49   | 0.79             | 0.009  | 0.008 | 0.87   | 0.87             |
| <b>Inferior Cingulum Bundle</b>             |        |       |        |                  |        |       |        |                  |        |       |        |                  |        |       |        |                  |
| IL-10                                       | -0.130 | 0.002 | 0.07   | 0.18             | 0.133  | 0.002 | 0.03   | 0.13             | 0.051  | 0.003 | 0.47   | 0.71             | 0.158  | 0.002 | 0.01   | <b>0.04</b>      |
| SES group                                   | -0.038 | 0.002 | 0.49   | 0.63             | 0.200  | 0.003 | <0.001 | <b>&lt;0.001</b> | 0.178  | 0.004 | <0.01  | <b>&lt;0.01</b>  | 0.162  | 0.003 | <0.01  | <b>&lt;0.01</b>  |
| GA at delivery                              | -0.113 | 0.001 | 0.06   | 0.10             | 0.067  | 0.001 | 0.19   | 0.40             | -0.034 | 0.001 | 0.57   | 0.81             | 0.109  | 0.001 | 0.03   | 0.15             |

|                                 |         |       |        |                  |        |         |        |                  |        |       |         |                  |        |       |        |                  |    |    |     |     |  |
|---------------------------------|---------|-------|--------|------------------|--------|---------|--------|------------------|--------|-------|---------|------------------|--------|-------|--------|------------------|----|----|-----|-----|--|
| PMA at scan                     | 0.410   | 0.001 | <0.001 | <b>&lt;0.001</b> | -0.613 | 0.001   | <0.001 | <b>&lt;0.001</b> | -0.332 | 0.001 | <0.001  | <b>&lt;0.001</b> | -0.636 | 0.001 | <0.001 | <b>&lt;0.001</b> |    |    |     |     |  |
| Sex                             | 0.001   | 0.002 | 0.99   | 0.99             | -0.123 | 0.003   | 0.01   | <b>0.03</b>      | -0.110 | 0.003 | 0.04    | 0.08             | -0.108 | 0.003 | 0.02   | 0.16             |    |    |     |     |  |
| IL-10:SES group                 | -0.010  | 0.003 | 0.89   | 0.92             | -0.026 | 0.003   | 0.67   | 0.78             | -0.036 | 0.004 | 0.62    | 0.79             | -0.031 | 0.003 | 0.60   | 0.81             |    |    |     |     |  |
| <b>Fornix</b>                   |         |       |        |                  |        |         |        |                  |        |       |         |                  |        |       |        |                  |    |    |     |     |  |
| IL-10                           | 0.083   | 0.001 | 0.24   | 0.31             | 0.053  | 0.002   | 0.38   | 0.55             | 0.092  | 0.003 | 0.17    | 0.55             | 0.022  | 0.002 | 0.71   | 0.75             |    |    |     |     |  |
| SES group                       | -0.105  | 0.002 | 0.06   | 0.18             | 0.112  | 0.003   | 0.02   | <b>0.02</b>      | 0.073  | 0.004 | 0.16    | 0.18             | 0.122  | 0.003 | 0.01   | <b>0.02</b>      |    |    |     |     |  |
| GA at delivery                  | 0.032   | 0.001 | 0.59   | 0.71             | -0.010 | 0.001   | 0.84   | 0.84             | 0.011  | 0.001 | 0.85    | 0.85             | -0.015 | 0.001 | 0.76   | 0.86             |    |    |     |     |  |
| PMA at scan                     | 0.359   | 0.001 | <0.001 | <b>&lt;0.001</b> | -0.633 | 0.001   | <0.001 | <b>&lt;0.001</b> | -0.489 | 0.001 | <0.001  | <b>&lt;0.001</b> | -0.646 | 0.001 | <0.001 | <b>&lt;0.001</b> |    |    |     |     |  |
| Sex                             | -0.085  | 0.002 | 0.12   | 0.32             | -0.028 | 0.003   | 0.54   | 0.61             | -0.072 | 0.004 | 0.16    | 0.18             | 0.000  | 0.003 | 0.99   | 0.99             |    |    |     |     |  |
| IL-10:SES group                 | 0.016   | 0.002 | 0.82   | 0.92             | -0.023 | 0.003   | 0.70   | 0.78             | 0.020  | 0.005 | 0.77    | 0.80             | -0.039 | 0.004 | 0.51   | 0.81             |    |    |     |     |  |
| <b>TNF-<math>\alpha</math></b>  |         |       |        |                  |        |         |        |                  |        |       |         |                  |        |       |        |                  |    |    |     |     |  |
|                                 | $\beta$ | SE    | FA     | $p$              | $q$    | $\beta$ | SE     | MD               | $p$    | $q$   | $\beta$ | SE               | AD     | $p$   | $q$    | $\beta$          | SE | RD | $p$ | $q$ |  |
| <b>Corpus Callosum</b>          |         |       |        |                  |        |         |        |                  |        |       |         |                  |        |       |        |                  |    |    |     |     |  |
| TNF- $\alpha$                   | 0.043   | 0.002 | 0.50   | 0.91             | -0.116 | 0.003   | 0.07   | 0.20             | -0.124 | 0.003 | 0.09    | 0.17             | -0.088 | 0.003 | 0.16   | 0.36             |    |    |     |     |  |
| SES group                       | 0.103   | 0.003 | 0.05   | 0.17             | -0.008 | 0.003   | 0.87   | 0.87             | 0.166  | 0.003 | <0.01   | <b>0.01</b>      | -0.056 | 0.004 | 0.25   | 0.25             |    |    |     |     |  |
| GA at delivery                  | 0.037   | 0.001 | 0.51   | 0.72             | 0.043  | 0.001   | 0.42   | 0.54             | 0.088  | 0.001 | 0.17    | 0.50             | 0.018  | 0.002 | 0.73   | 0.94             |    |    |     |     |  |
| PMA at scan                     | 0.466   | 0.001 | <0.001 | <b>&lt;0.001</b> | -0.569 | 0.001   | <0.001 | <b>&lt;0.001</b> | -0.220 | 0.001 | <0.001  | <b>&lt;0.001</b> | -0.563 | 0.002 | <0.001 | <b>&lt;0.001</b> |    |    |     |     |  |
| Sex                             | -0.088  | 0.003 | 0.08   | 0.20             | -0.018 | 0.003   | 0.72   | 0.72             | -0.107 | 0.003 | 0.06    | 0.08             | 0.040  | 0.004 | 0.41   | 0.73             |    |    |     |     |  |
| TNF- $\alpha$ :SES group        | -0.073  | 0.004 | 0.26   | 0.64             | 0.084  | 0.004   | 0.18   | 0.27             | 0.066  | 0.004 | 0.37    | 0.48             | 0.074  | 0.005 | 0.24   | 0.35             |    |    |     |     |  |
| <b>Superior Cingulum Bundle</b> |         |       |        |                  |        |         |        |                  |        |       |         |                  |        |       |        |                  |    |    |     |     |  |
| TNF- $\alpha$                   | 0.010   | 0.002 | 0.89   | 0.94             | -0.104 | 0.003   | 0.10   | 0.23             | -0.105 | 0.004 | 0.12    | 0.18             | -0.082 | 0.004 | 0.21   | 0.37             |    |    |     |     |  |
| SES group                       | -0.153  | 0.003 | 0.01   | 0.06             | 0.156  | 0.004   | <0.01  | <b>&lt;0.01</b>  | 0.053  | 0.005 | 0.33    | 0.33             | 0.179  | 0.005 | <0.01  | <b>&lt;0.01</b>  |    |    |     |     |  |
| GA at delivery                  | 0.134   | 0.001 | 0.03   | 0.07             | -0.046 | 0.002   | 0.41   | 0.54             | 0.038  | 0.002 | 0.52    | 0.77             | -0.079 | 0.002 | 0.15   | 0.27             |    |    |     |     |  |
| PMA at scan                     | 0.312   | 0.001 | <0.001 | <b>&lt;0.001</b> | -0.495 | 0.002   | <0.001 | <b>&lt;0.001</b> | -0.391 | 0.002 | <0.001  | <b>&lt;0.001</b> | -0.472 | 0.002 | <0.001 | <b>&lt;0.001</b> |    |    |     |     |  |
| Sex                             | -0.101  | 0.003 | 0.06   | 0.20             | -0.047 | 0.004   | 0.34   | 0.47             | -0.141 | 0.005 | 0.01    | <b>0.02</b>      | 0.002  | 0.005 | 0.97   | 0.97             |    |    |     |     |  |
| TNF- $\alpha$ :SES group        | 0.017   | 0.003 | 0.81   | 0.86             | 0.167  | 0.005   | 0.01   | 0.08             | 0.214  | 0.006 | <0.01   | <b>0.02</b>      | 0.116  | 0.006 | 0.07   | 0.34             |    |    |     |     |  |
| <b>Corticospinal Tract</b>      |         |       |        |                  |        |         |        |                  |        |       |         |                  |        |       |        |                  |    |    |     |     |  |
| TNF- $\alpha$                   | -0.005  | 0.002 | 0.93   | 0.94             | -0.034 | 0.003   | 0.53   | 0.68             | -0.072 | 0.003 | 0.22    | 0.28             | -0.024 | 0.004 | 0.67   | 0.92             |    |    |     |     |  |
| SES group                       | 0.045   | 0.003 | 0.36   | 0.65             | 0.109  | 0.004   | 0.01   | <b>0.01</b>      | 0.225  | 0.004 | <0.001  | <b>&lt;0.001</b> | 0.062  | 0.005 | 0.16   | 0.18             |    |    |     |     |  |
| GA at delivery                  | 0.031   | 0.001 | 0.56   | 0.72             | 0.022  | 0.002   | 0.63   | 0.71             | 0.051  | 0.001 | 0.30    | 0.68             | 0.007  | 0.002 | 0.87   | 0.98             |    |    |     |     |  |
| PMA at scan                     | 0.537   | 0.001 | <0.001 | <b>&lt;0.001</b> | -0.706 | 0.002   | <0.001 | <b>&lt;0.001</b> | -0.636 | 0.001 | <0.001  | <b>&lt;0.001</b> | -0.681 | 0.002 | <0.001 | <b>&lt;0.001</b> |    |    |     |     |  |
| Sex                             | -0.013  | 0.003 | 0.78   | 0.99             | -0.048 | 0.004   | 0.25   | 0.46             | -0.087 | 0.003 | 0.06    | 0.08             | -0.033 | 0.005 | 0.45   | 0.73             |    |    |     |     |  |
| TNF- $\alpha$ :SES group        | -0.057  | 0.004 | 0.36   | 0.65             | 0.065  | 0.005   | 0.24   | 0.30             | 0.048  | 0.004 | 0.41    | 0.48             | 0.068  | 0.006 | 0.23   | 0.35             |    |    |     |     |  |
| <b>Optic Radiation</b>          |         |       |        |                  |        |         |        |                  |        |       |         |                  |        |       |        |                  |    |    |     |     |  |
| TNF- $\alpha$                   | -0.021  | 0.002 | 0.74   | 0.94             | 0.001  | 0.004   | 0.98   | 0.98             | 0.002  | 0.004 | 0.98    | 0.98             | 0.008  | 0.004 | 0.89   | 0.92             |    |    |     |     |  |
| SES group                       | 0.082   | 0.003 | 0.11   | 0.24             | 0.175  | 0.005   | <0.01  | <b>&lt;0.01</b>  | 0.304  | 0.005 | <0.001  | <b>&lt;0.001</b> | 0.112  | 0.006 | 0.02   | <b>0.03</b>      |    |    |     |     |  |
| GA at delivery                  | 0.008   | 0.001 | 0.89   | 0.89             | -0.110 | 0.002   | 0.03   | 0.23             | -0.130 | 0.002 | 0.02    | 0.10             | -0.090 | 0.002 | 0.07   | 0.16             |    |    |     |     |  |
| PMA at scan                     | 0.530   | 0.001 | <0.001 | <b>&lt;0.001</b> | -0.570 | 0.002   | <0.001 | <b>&lt;0.001</b> | -0.315 | 0.002 | <0.001  | <b>&lt;0.001</b> | -0.603 | 0.002 | <0.001 | <b>&lt;0.001</b> |    |    |     |     |  |

|                                             |        |       |        |                  |        |       |        |                  |        |       |        |                  |        |       |        |                  |
|---------------------------------------------|--------|-------|--------|------------------|--------|-------|--------|------------------|--------|-------|--------|------------------|--------|-------|--------|------------------|
| Sex                                         | 0.001  | 0.003 | 0.99   | 0.99             | -0.130 | 0.005 | <0.01  | <b>0.03</b>      | -0.196 | 0.005 | <0.001 | <b>&lt;0.01</b>  | -0.097 | 0.006 | 0.03   | 0.14             |
| TNF- $\alpha$ :SES group                    | -0.017 | 0.004 | 0.79   | 0.86             | 0.017  | 0.006 | 0.77   | 0.77             | -0.002 | 0.006 | 0.97   | 0.97             | 0.018  | 0.007 | 0.76   | 0.76             |
| <b>Uncinate Fasciculus</b>                  |        |       |        |                  |        |       |        |                  |        |       |        |                  |        |       |        |                  |
| TNF- $\alpha$                               | -0.133 | 0.002 | 0.03   | 0.15             | -0.026 | 0.003 | 0.68   | 0.77             | -0.128 | 0.004 | 0.07   | 0.16             | 0.022  | 0.003 | 0.71   | 0.92             |
| SES group                                   | -0.025 | 0.003 | 0.61   | 0.91             | 0.147  | 0.004 | <0.01  | <b>0.01</b>      | 0.144  | 0.005 | 0.01   | <b>0.01</b>      | 0.125  | 0.004 | 0.01   | <b>0.02</b>      |
| GA at delivery                              | 0.116  | 0.001 | 0.03   | 0.07             | 0.056  | 0.002 | 0.30   | 0.54             | 0.150  | 0.002 | 0.01   | 0.10             | 0.001  | 0.002 | 0.99   | 0.99             |
| PMA at scan                                 | 0.493  | 0.001 | <0.001 | <b>&lt;0.001</b> | -0.564 | 0.002 | <0.001 | <b>&lt;0.001</b> | -0.284 | 0.002 | <0.001 | <b>&lt;0.001</b> | -0.613 | 0.002 | <0.001 | <b>&lt;0.001</b> |
| Sex                                         | -0.084 | 0.002 | 0.09   | 0.20             | -0.066 | 0.004 | 0.18   | 0.41             | -0.136 | 0.005 | 0.01   | <b>0.03</b>      | -0.027 | 0.004 | 0.57   | 0.73             |
| TNF- $\alpha$ :SES group                    | 0.020  | 0.003 | 0.75   | 0.86             | -0.064 | 0.005 | 0.31   | 0.35             | -0.056 | 0.006 | 0.43   | 0.48             | -0.058 | 0.005 | 0.34   | 0.38             |
| <b>Inferior Fronto-Occipital Fasciculus</b> |        |       |        |                  |        |       |        |                  |        |       |        |                  |        |       |        |                  |
| TNF- $\alpha$                               | 0.050  | 0.002 | 0.38   | 0.85             | -0.083 | 0.004 | 0.14   | 0.24             | -0.065 | 0.003 | 0.32   | 0.36             | -0.078 | 0.004 | 0.15   | 0.36             |
| SES group                                   | 0.000  | 0.003 | 1.00   | 1.00             | 0.134  | 0.005 | <0.01  | <b>0.01</b>      | 0.245  | 0.004 | <0.001 | <b>&lt;0.001</b> | 0.097  | 0.006 | 0.03   | <b>0.04</b>      |
| GA at delivery                              | 0.137  | 0.001 | 0.01   | 0.05             | -0.084 | 0.002 | 0.08   | 0.23             | 0.017  | 0.001 | 0.77   | 0.86             | -0.105 | 0.002 | 0.03   | 0.13             |
| PMA at scan                                 | 0.588  | 0.001 | <0.001 | <b>&lt;0.001</b> | -0.636 | 0.002 | <0.001 | <b>&lt;0.001</b> | -0.457 | 0.001 | <0.001 | <b>&lt;0.001</b> | -0.640 | 0.002 | <0.001 | <b>&lt;0.001</b> |
| Sex                                         | 0.004  | 0.003 | 0.93   | 0.99             | -0.112 | 0.005 | 0.01   | <b>0.03</b>      | -0.181 | 0.004 | <0.001 | <b>&lt;0.01</b>  | -0.079 | 0.006 | 0.06   | 0.19             |
| TNF- $\alpha$ :SES group                    | -0.069 | 0.004 | 0.23   | 0.64             | 0.084  | 0.006 | 0.13   | 0.24             | 0.070  | 0.004 | 0.28   | 0.48             | 0.083  | 0.007 | 0.13   | 0.35             |
| <b>Anterior Limb of Internal Capsule</b>    |        |       |        |                  |        |       |        |                  |        |       |        |                  |        |       |        |                  |
| TNF- $\alpha$                               | 0.059  | 0.002 | 0.31   | 0.85             | -0.146 | 0.004 | 0.01   | 0.06             | -0.166 | 0.004 | 0.01   | 0.04             | -0.132 | 0.005 | 0.02   | 0.19             |
| SES group                                   | 0.011  | 0.003 | 0.81   | 0.91             | 0.125  | 0.006 | 0.01   | <b>0.01</b>      | 0.181  | 0.005 | <0.01  | <b>&lt;0.01</b>  | 0.099  | 0.007 | 0.03   | <b>0.04</b>      |
| GA at delivery                              | 0.118  | 0.001 | 0.02   | 0.07             | -0.093 | 0.002 | 0.07   | 0.23             | -0.027 | 0.002 | 0.64   | 0.82             | -0.106 | 0.002 | 0.03   | 0.13             |
| PMA at scan                                 | 0.590  | 0.001 | <0.001 | <b>&lt;0.001</b> | -0.569 | 0.002 | <0.001 | <b>&lt;0.001</b> | -0.430 | 0.002 | <0.001 | <b>&lt;0.001</b> | -0.592 | 0.002 | <0.001 | <b>&lt;0.001</b> |
| Sex                                         | -0.026 | 0.003 | 0.56   | 0.99             | -0.042 | 0.006 | 0.37   | 0.47             | -0.064 | 0.005 | 0.22   | 0.22             | -0.029 | 0.006 | 0.52   | 0.73             |
| TNF- $\alpha$ :SES group                    | -0.061 | 0.003 | 0.29   | 0.64             | 0.111  | 0.007 | 0.06   | 0.14             | 0.120  | 0.006 | 0.07   | 0.17             | 0.103  | 0.008 | 0.08   | 0.34             |
| <b>Inferior Cingulum Bundle</b>             |        |       |        |                  |        |       |        |                  |        |       |        |                  |        |       |        |                  |
| TNF- $\alpha$                               | -0.171 | 0.002 | 0.01   | 0.12             | -0.075 | 0.002 | 0.20   | 0.31             | -0.196 | 0.003 | <0.01  | <b>0.04</b>      | 0.006  | 0.002 | 0.92   | 0.92             |
| SES group                                   | -0.019 | 0.002 | 0.73   | 0.91             | 0.199  | 0.003 | <0.001 | <b>&lt;0.001</b> | 0.190  | 0.003 | <0.01  | <b>&lt;0.01</b>  | 0.154  | 0.003 | <0.01  | <b>0.01</b>      |
| GA at delivery                              | -0.114 | 0.001 | 0.05   | 0.10             | 0.062  | 0.001 | 0.22   | 0.50             | -0.040 | 0.001 | 0.50   | 0.77             | 0.103  | 0.001 | 0.04   | 0.13             |
| PMA at scan                                 | 0.427  | 0.001 | <0.001 | <b>&lt;0.001</b> | -0.609 | 0.001 | <0.001 | <b>&lt;0.001</b> | -0.319 | 0.001 | <0.001 | <b>&lt;0.001</b> | -0.639 | 0.001 | <0.001 | <b>&lt;0.001</b> |
| Sex                                         | -0.016 | 0.002 | 0.76   | 0.99             | -0.124 | 0.003 | 0.01   | <b>0.03</b>      | -0.125 | 0.003 | 0.02   | <b>0.04</b>      | -0.103 | 0.003 | 0.03   | 0.14             |
| TNF- $\alpha$ :SES group                    | 0.081  | 0.003 | 0.24   | 0.64             | 0.133  | 0.003 | 0.03   | 0.12             | 0.197  | 0.004 | 0.00   | <b>0.02</b>      | 0.062  | 0.004 | 0.30   | 0.38             |
| <b>Fornix</b>                               |        |       |        |                  |        |       |        |                  |        |       |        |                  |        |       |        |                  |
| TNF- $\alpha$                               | -0.005 | 0.001 | 0.94   | 0.94             | -0.148 | 0.002 | 0.01   | 0.06             | -0.169 | 0.003 | 0.01   | <b>0.04</b>      | -0.118 | 0.002 | 0.04   | 0.19             |
| SES group                                   | -0.107 | 0.002 | 0.06   | 0.17             | 0.116  | 0.003 | 0.01   | <b>0.01</b>      | 0.073  | 0.004 | 0.16   | 0.18             | 0.130  | 0.003 | <0.01  | <b>0.01</b>      |
| GA at delivery                              | 0.021  | 0.001 | 0.73   | 0.82             | -0.018 | 0.001 | 0.72   | 0.72             | 0.000  | 0.001 | 1.00   | 1.00             | -0.024 | 0.001 | 0.63   | 0.94             |
| PMA at scan                                 | 0.352  | 0.001 | <0.001 | <b>&lt;0.001</b> | -0.624 | 0.001 | <0.001 | <b>&lt;0.001</b> | -0.482 | 0.001 | <0.001 | <b>&lt;0.001</b> | -0.634 | 0.001 | <0.001 | <b>&lt;0.001</b> |
| Sex                                         | -0.102 | 0.002 | 0.06   | 0.20             | -0.030 | 0.003 | 0.51   | 0.57             | -0.084 | 0.004 | 0.10   | 0.11             | 0.007  | 0.003 | 0.87   | 0.97             |
| TNF- $\alpha$ :SES group                    | 0.012  | 0.002 | 0.86   | 0.86             | 0.110  | 0.004 | 0.06   | 0.14             | 0.154  | 0.005 | 0.02   | 0.06             | 0.077  | 0.004 | 0.19   | 0.35             |



$\beta$ , standardized beta coefficient; SE, standard error;  $q$ , FDR-corrected p-value; IL, interleukin; TNF- $\alpha$ , tumor necrosis factor alpha; FA, fractional anisotropy; MD, mean diffusivity; AD, axial diffusivity; RD, radial diffusivity; GA, gestational age; PMA, infant postmenstrual age; SES, socioeconomic status.

# Figures

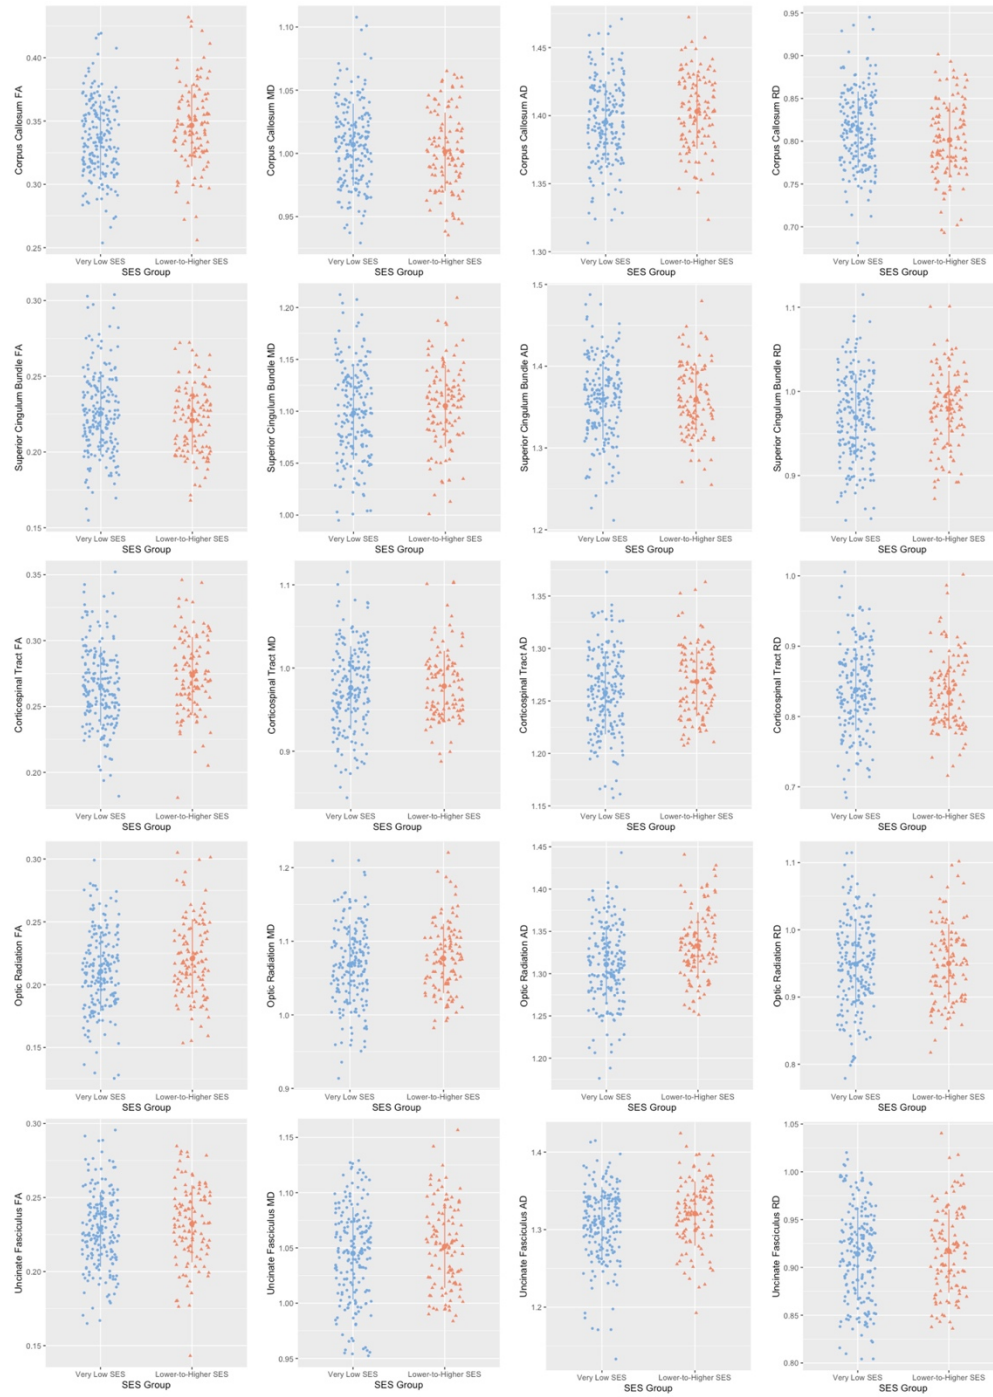

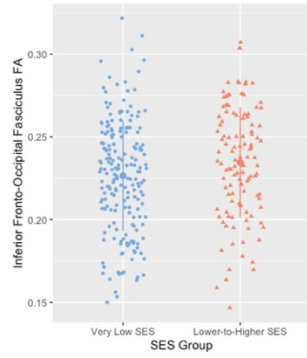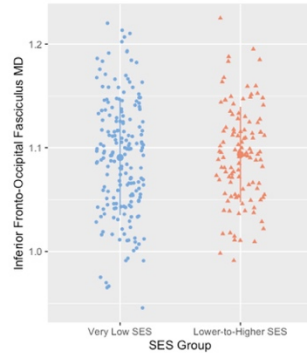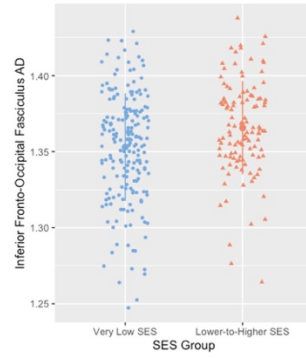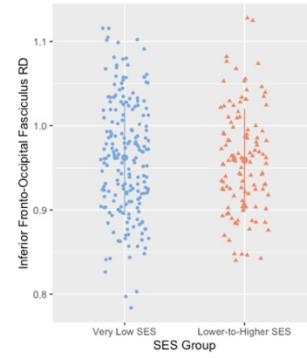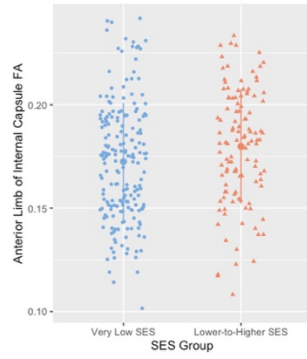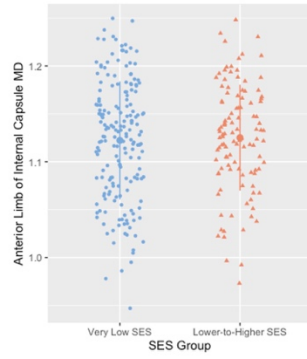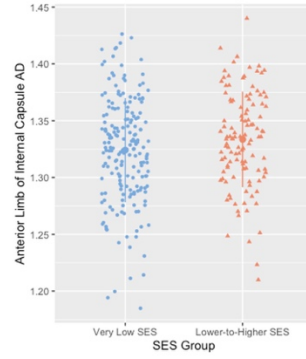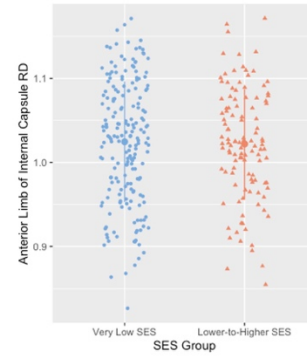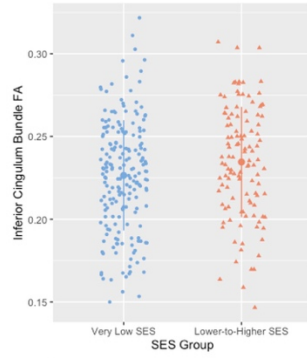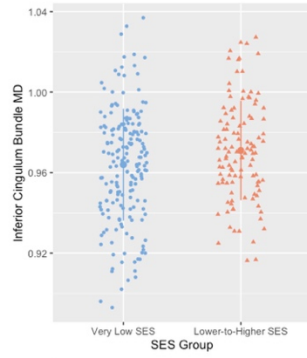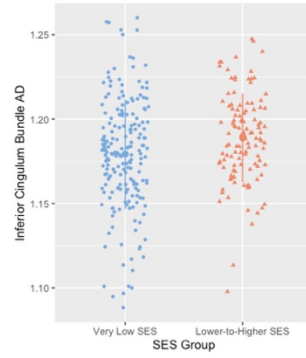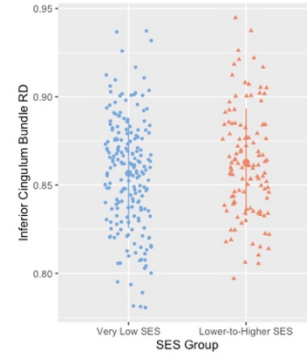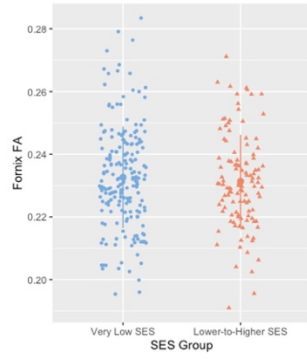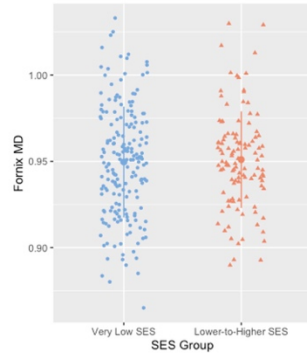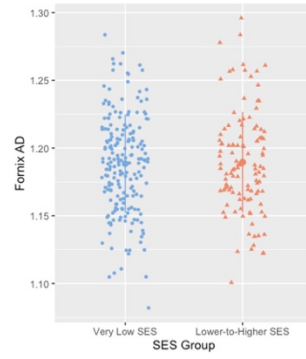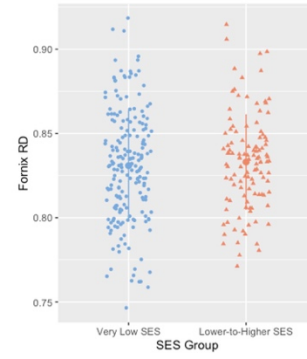

**Figure S1.** Dimensional scatterplots of the relationships between family SES group and neonatal white matter tract dMRI parameters. FA, fractional anisotropy; MD, mean diffusivity; AD, axial diffusivity; RD, radial diffusivity.

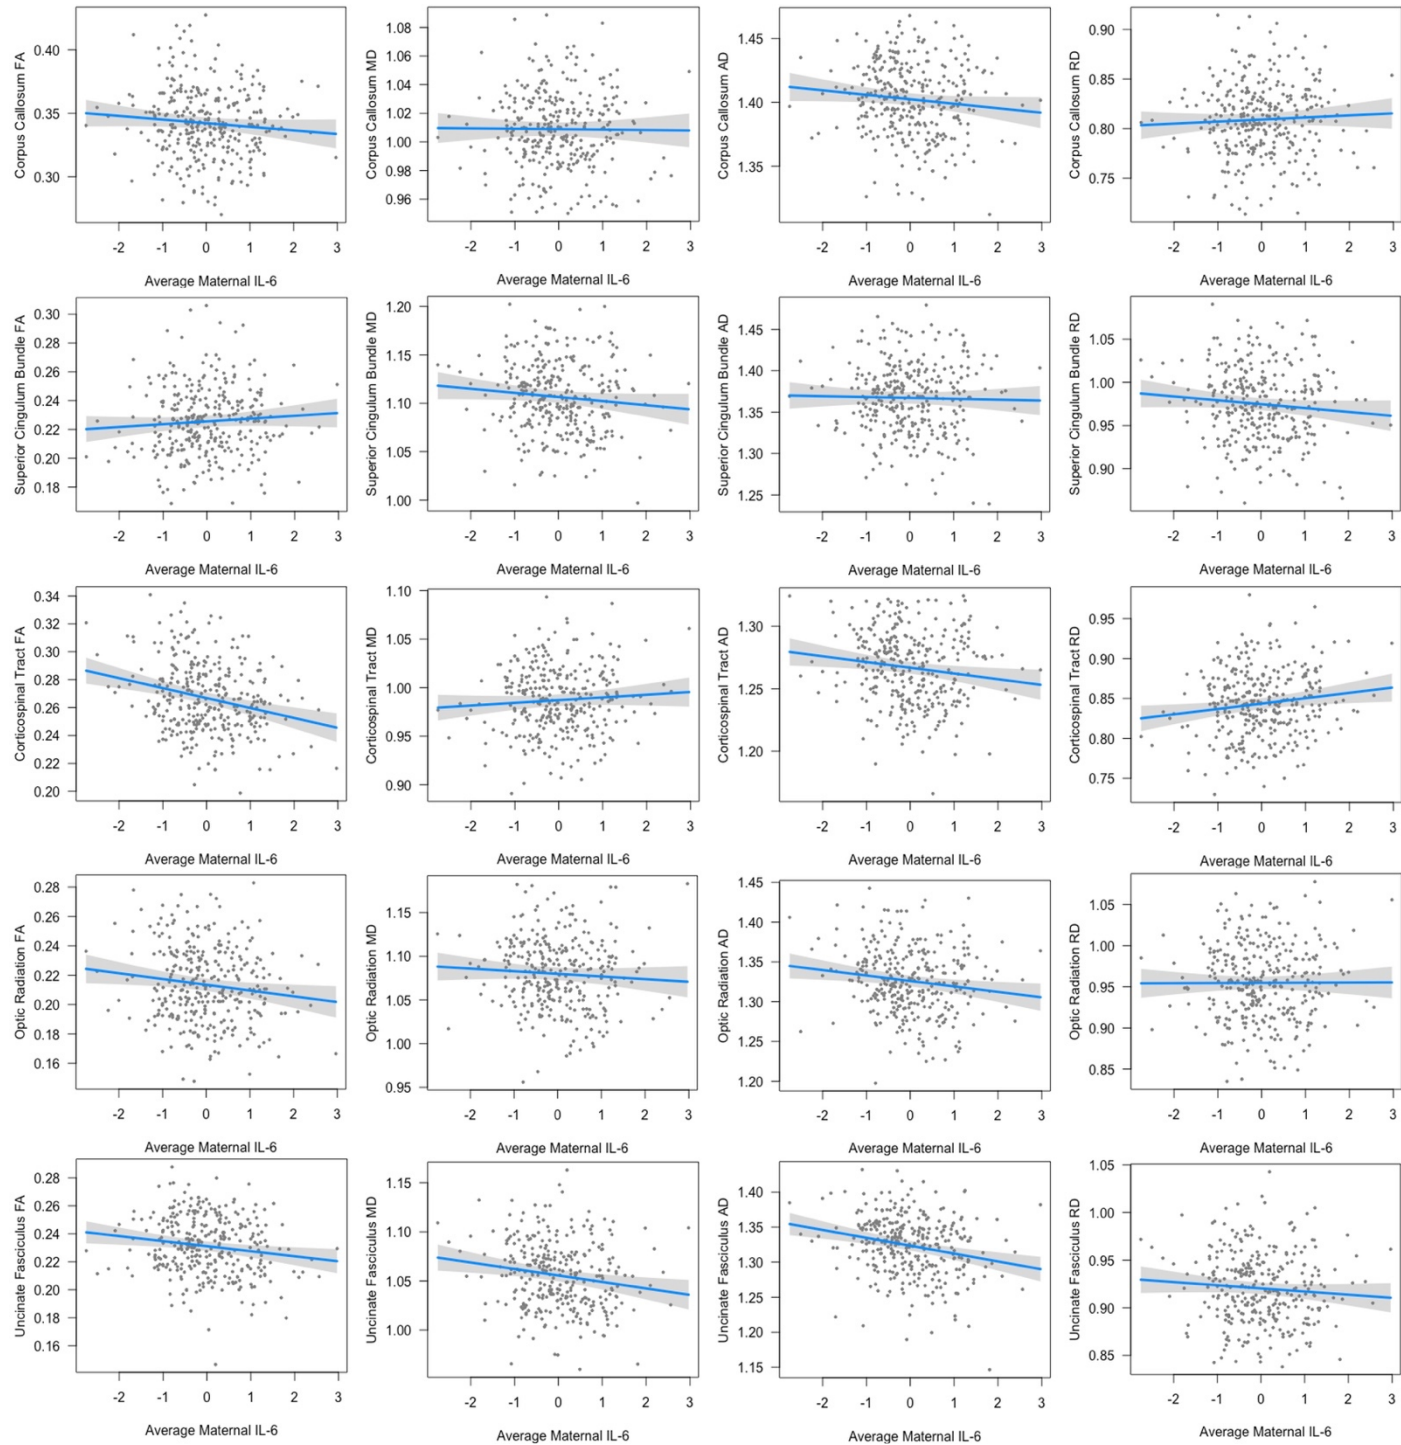

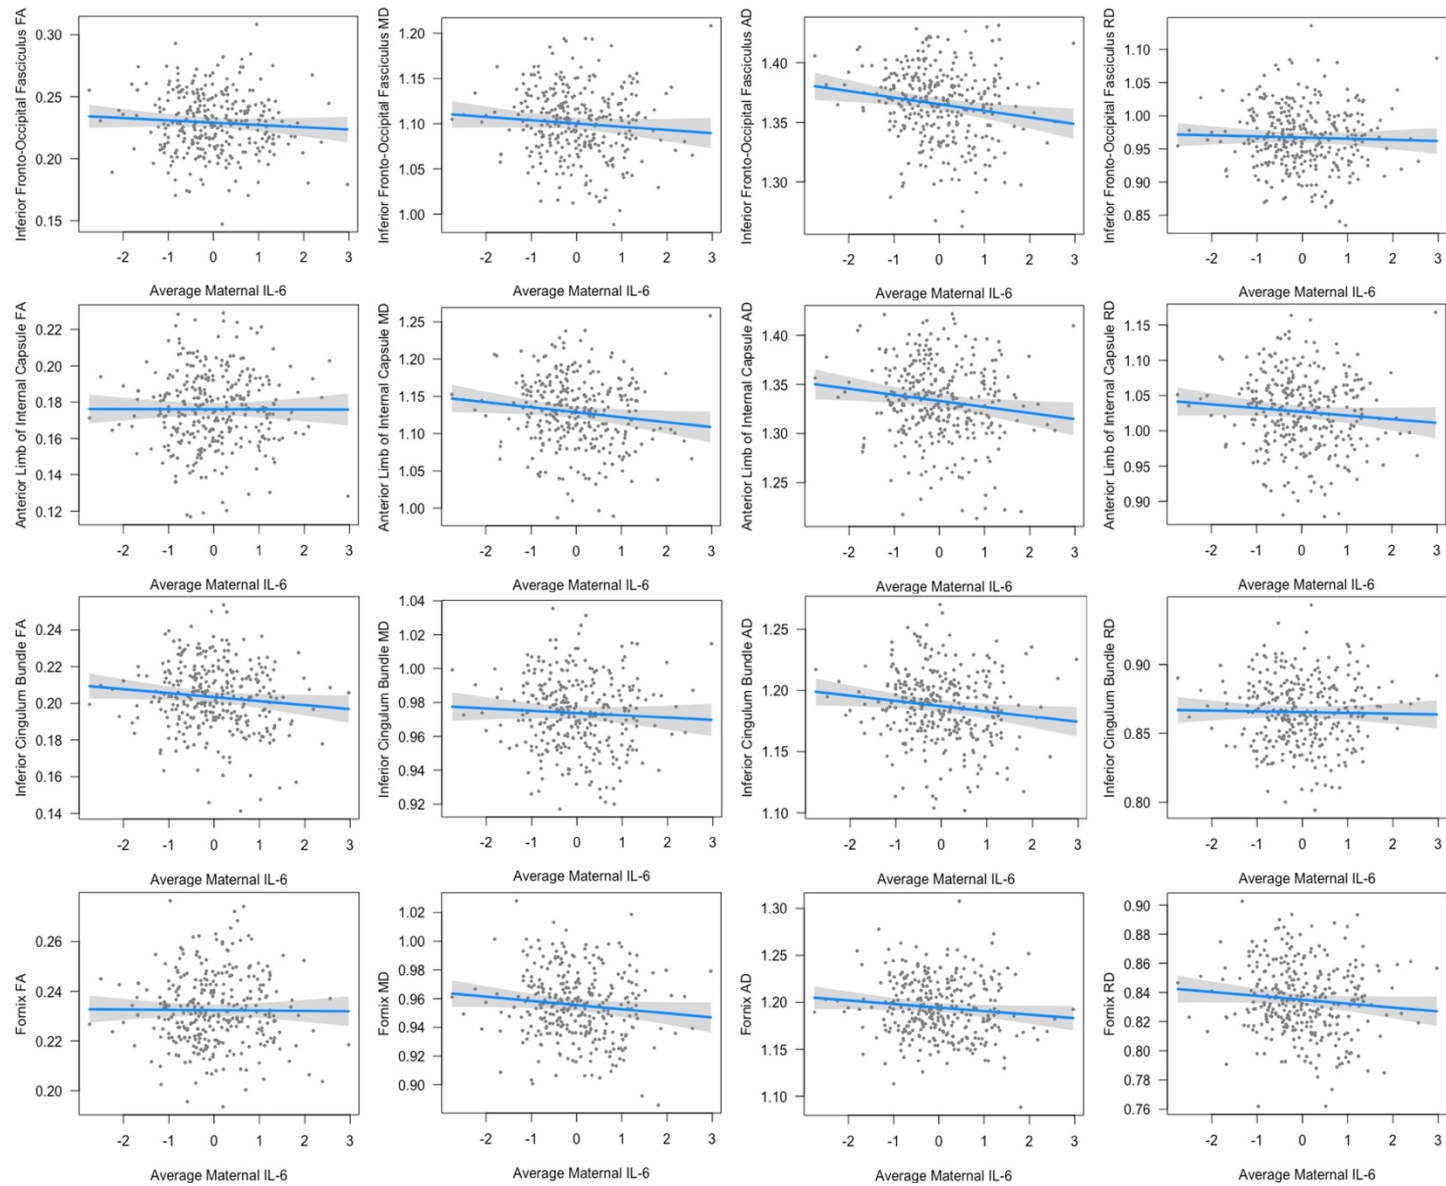

**Figure S2.** Multiple linear regression plots of the relationship between average maternal IL-6 levels during pregnancy and neonatal white matter tract dMRI parameters. Covariates in models are child sex, gestational age at delivery, infant postmenstrual age at scan, and NICU stay. FA, fractional anisotropy; MD, mean diffusivity; AD, axial diffusivity; RD, radial diffusivity; IL, interleukin.

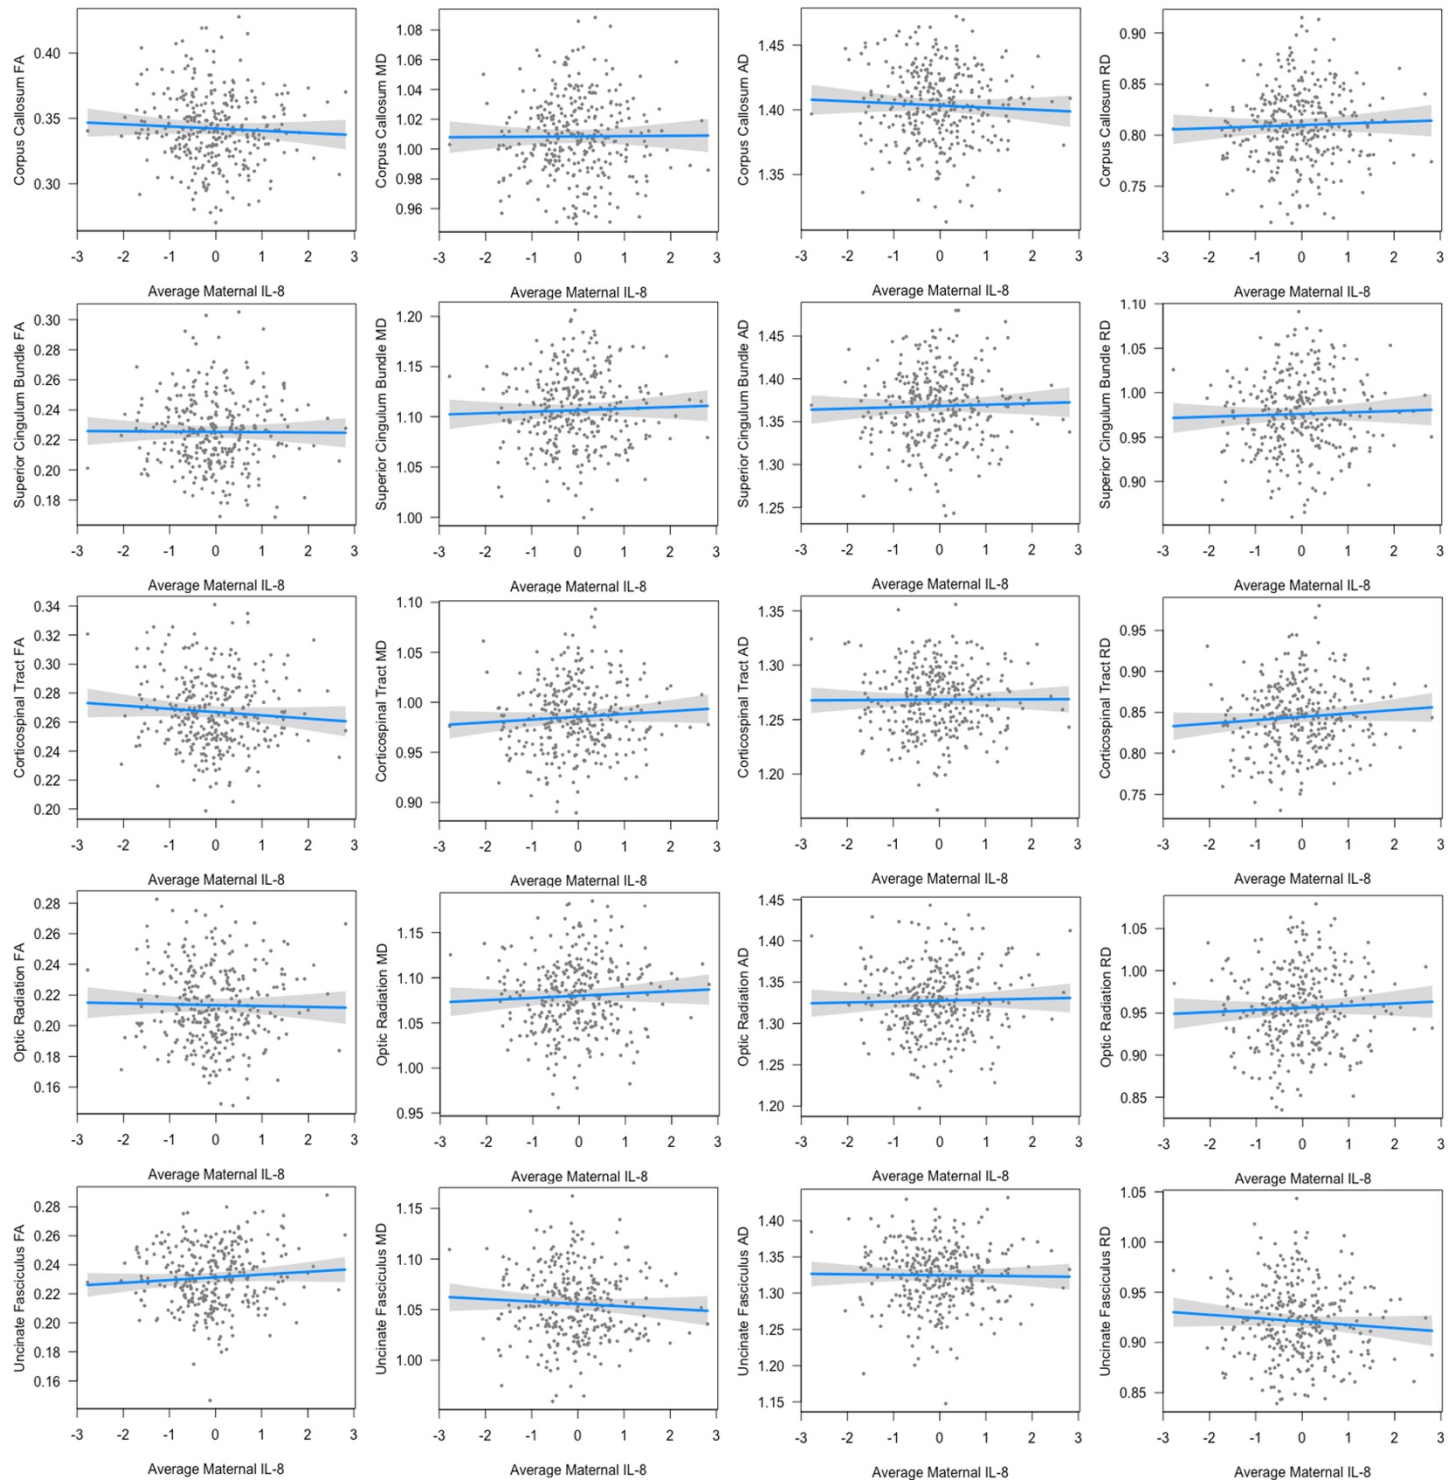

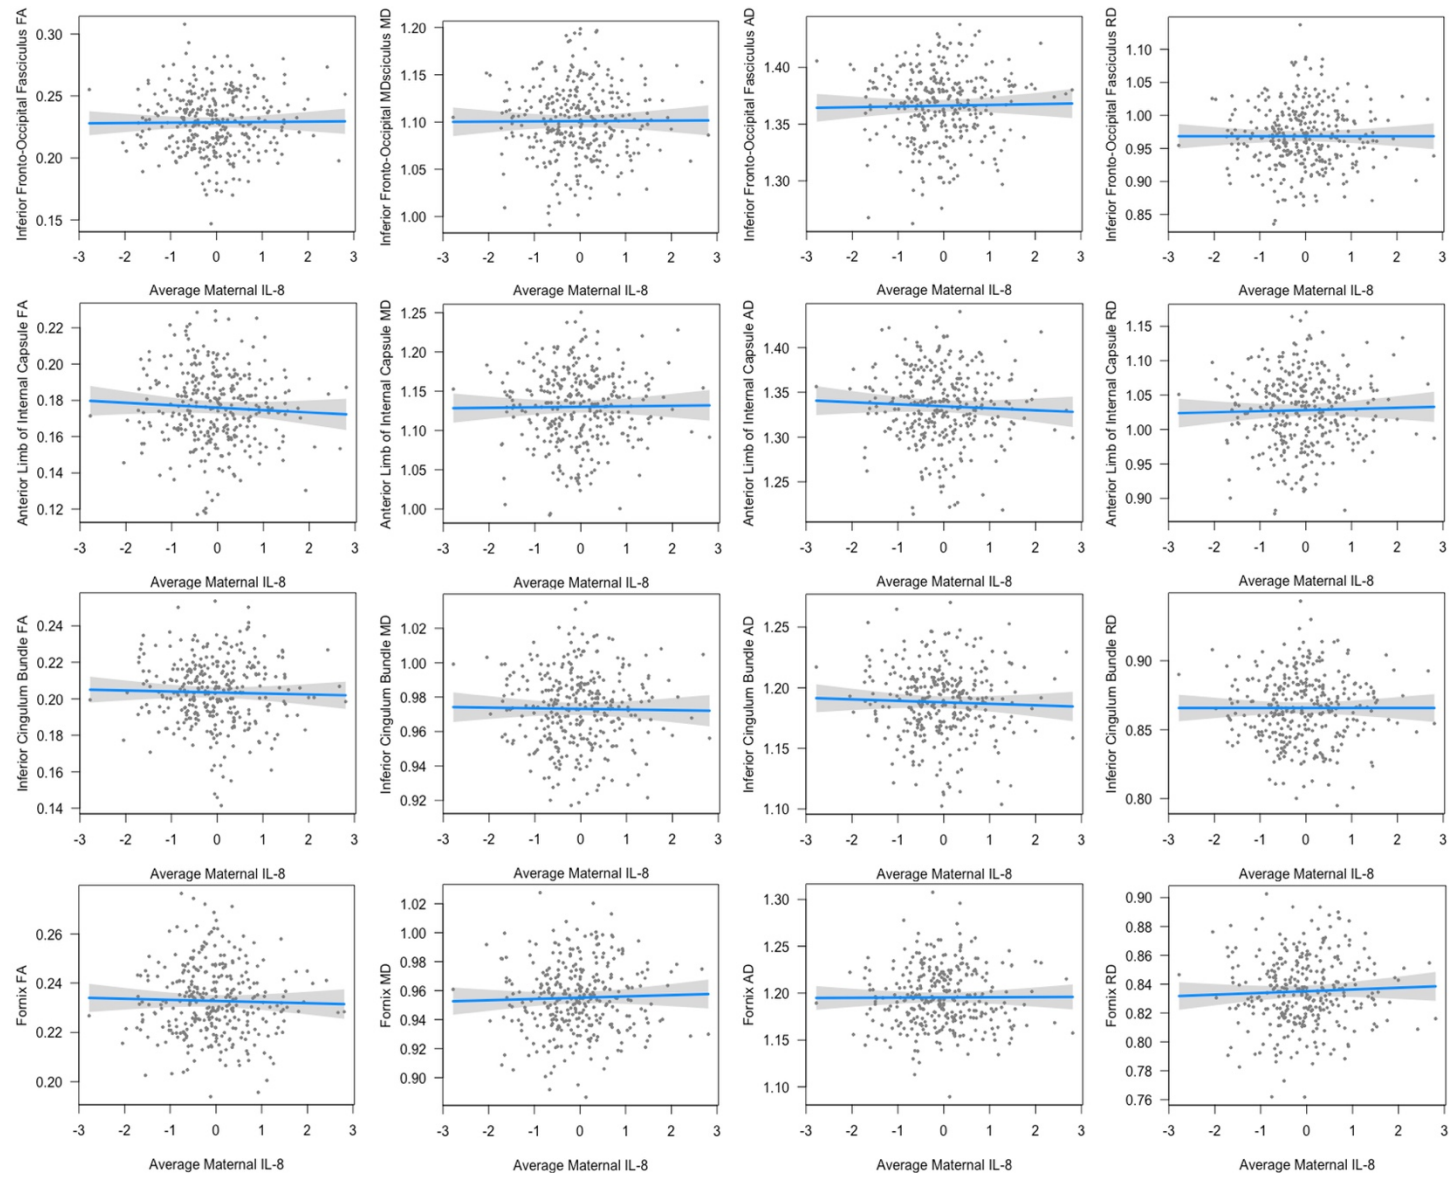

**Figure S3.** Multiple linear regression plots of the relationship between average maternal IL-8 levels during pregnancy and neonatal white matter tract dMRI parameters. Covariates in models are child sex, gestational age at delivery, infant postmenstrual age at scan, and NICU stay. FA, fractional anisotropy; MD, mean diffusivity; AD, axial diffusivity; RD, radial diffusivity; IL, interleukin.



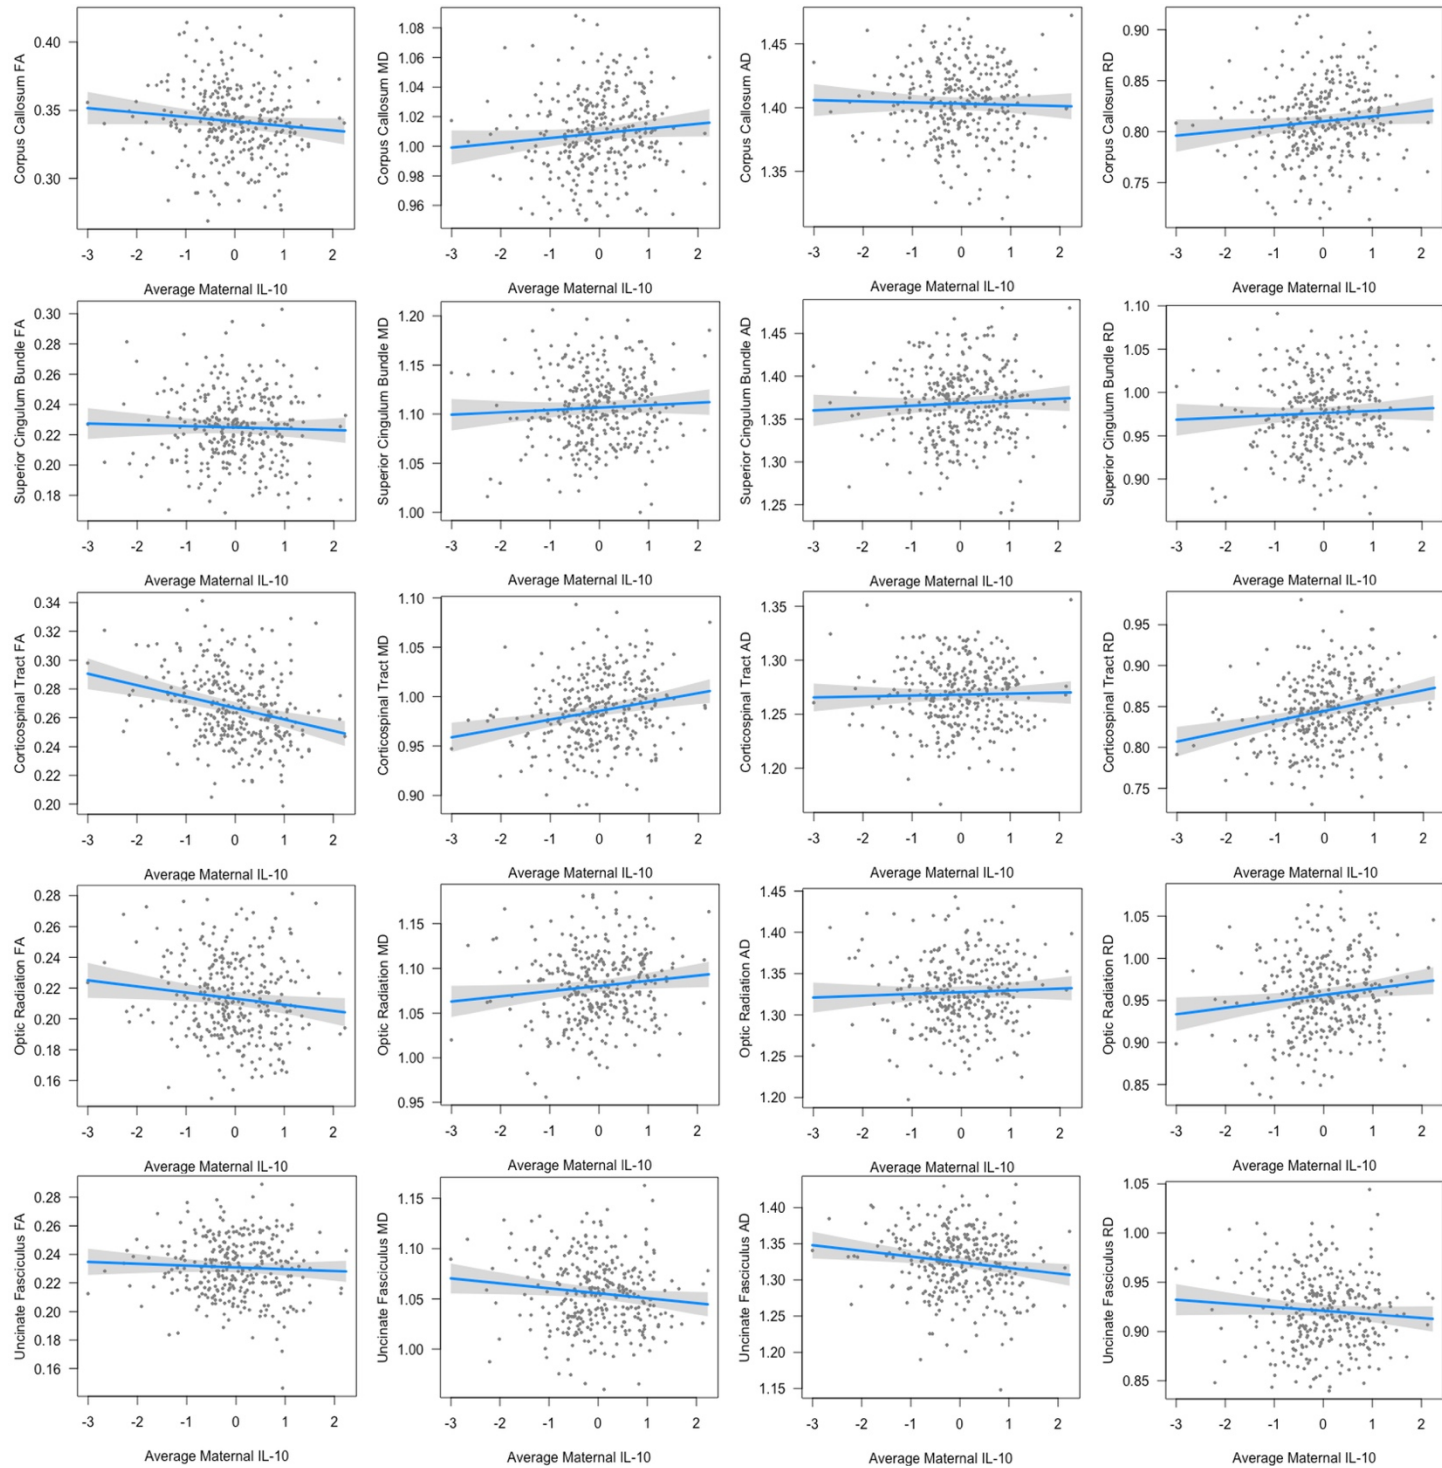

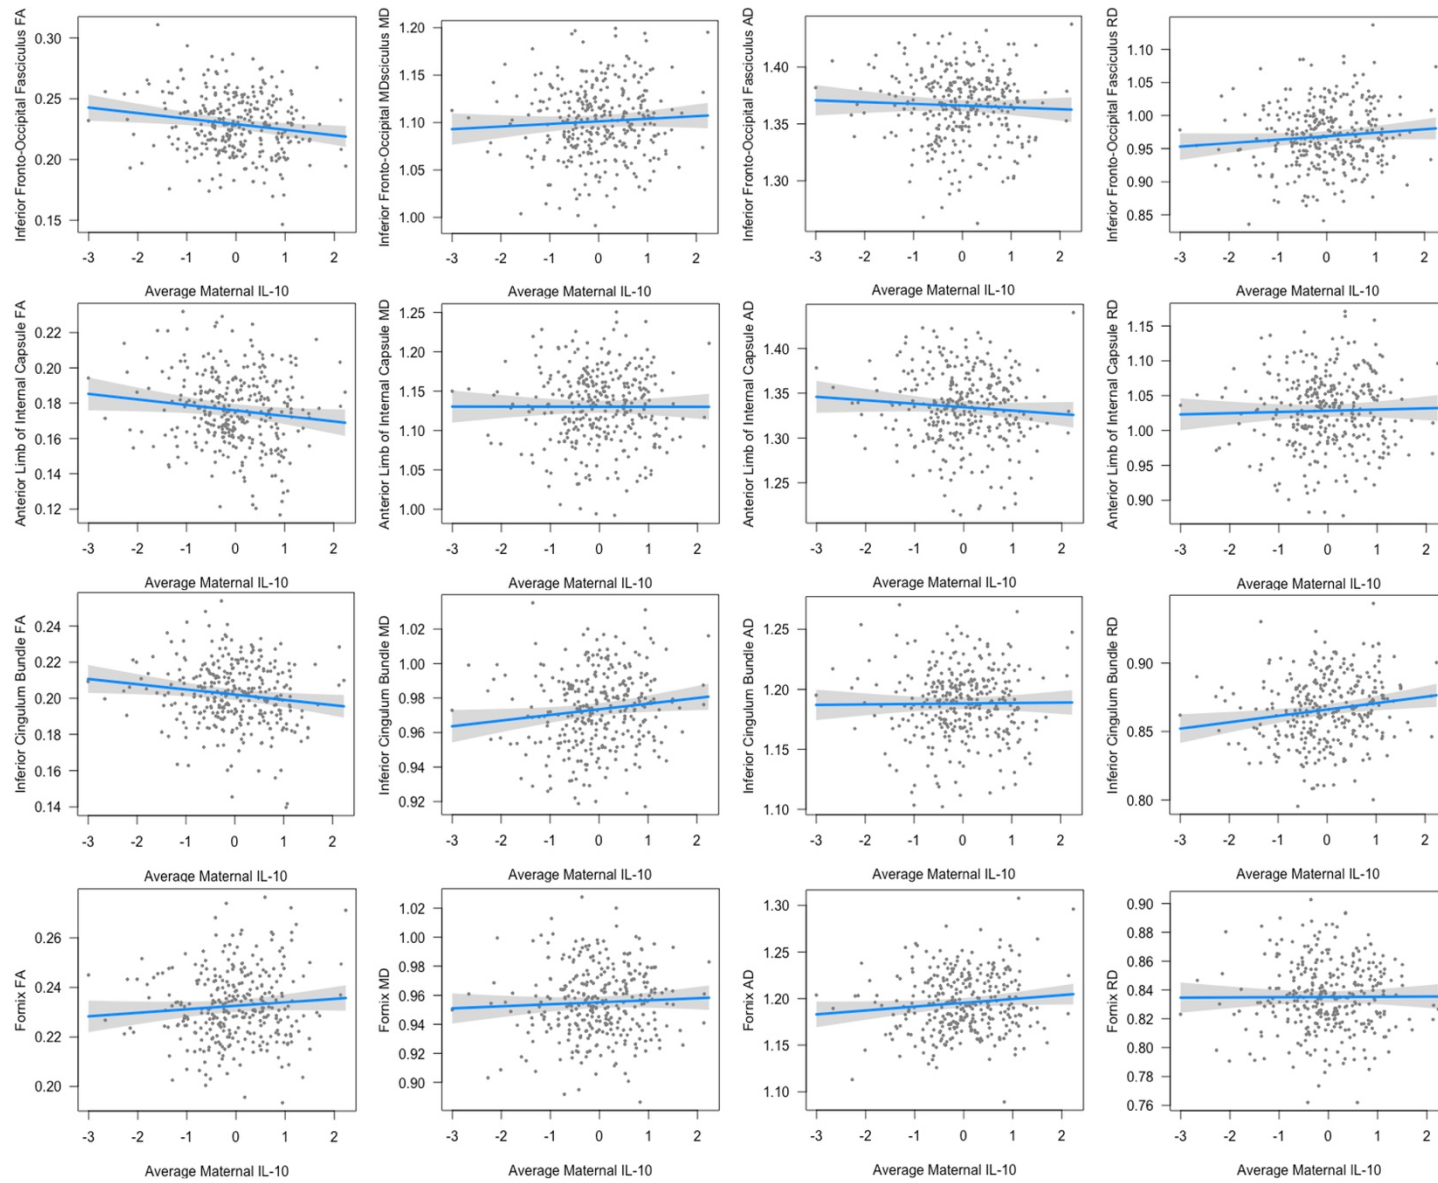

**Figure S4.** Multiple linear regression plots of the relationship between average maternal IL-10 levels during pregnancy and neonatal white matter tract dMRI parameters. Covariates in models are child sex, gestational age at delivery, infant postmenstrual age at scan, and NICU stay. FA, fractional anisotropy; MD, mean diffusivity; AD, axial diffusivity; RD, radial diffusivity; IL, interleukin.

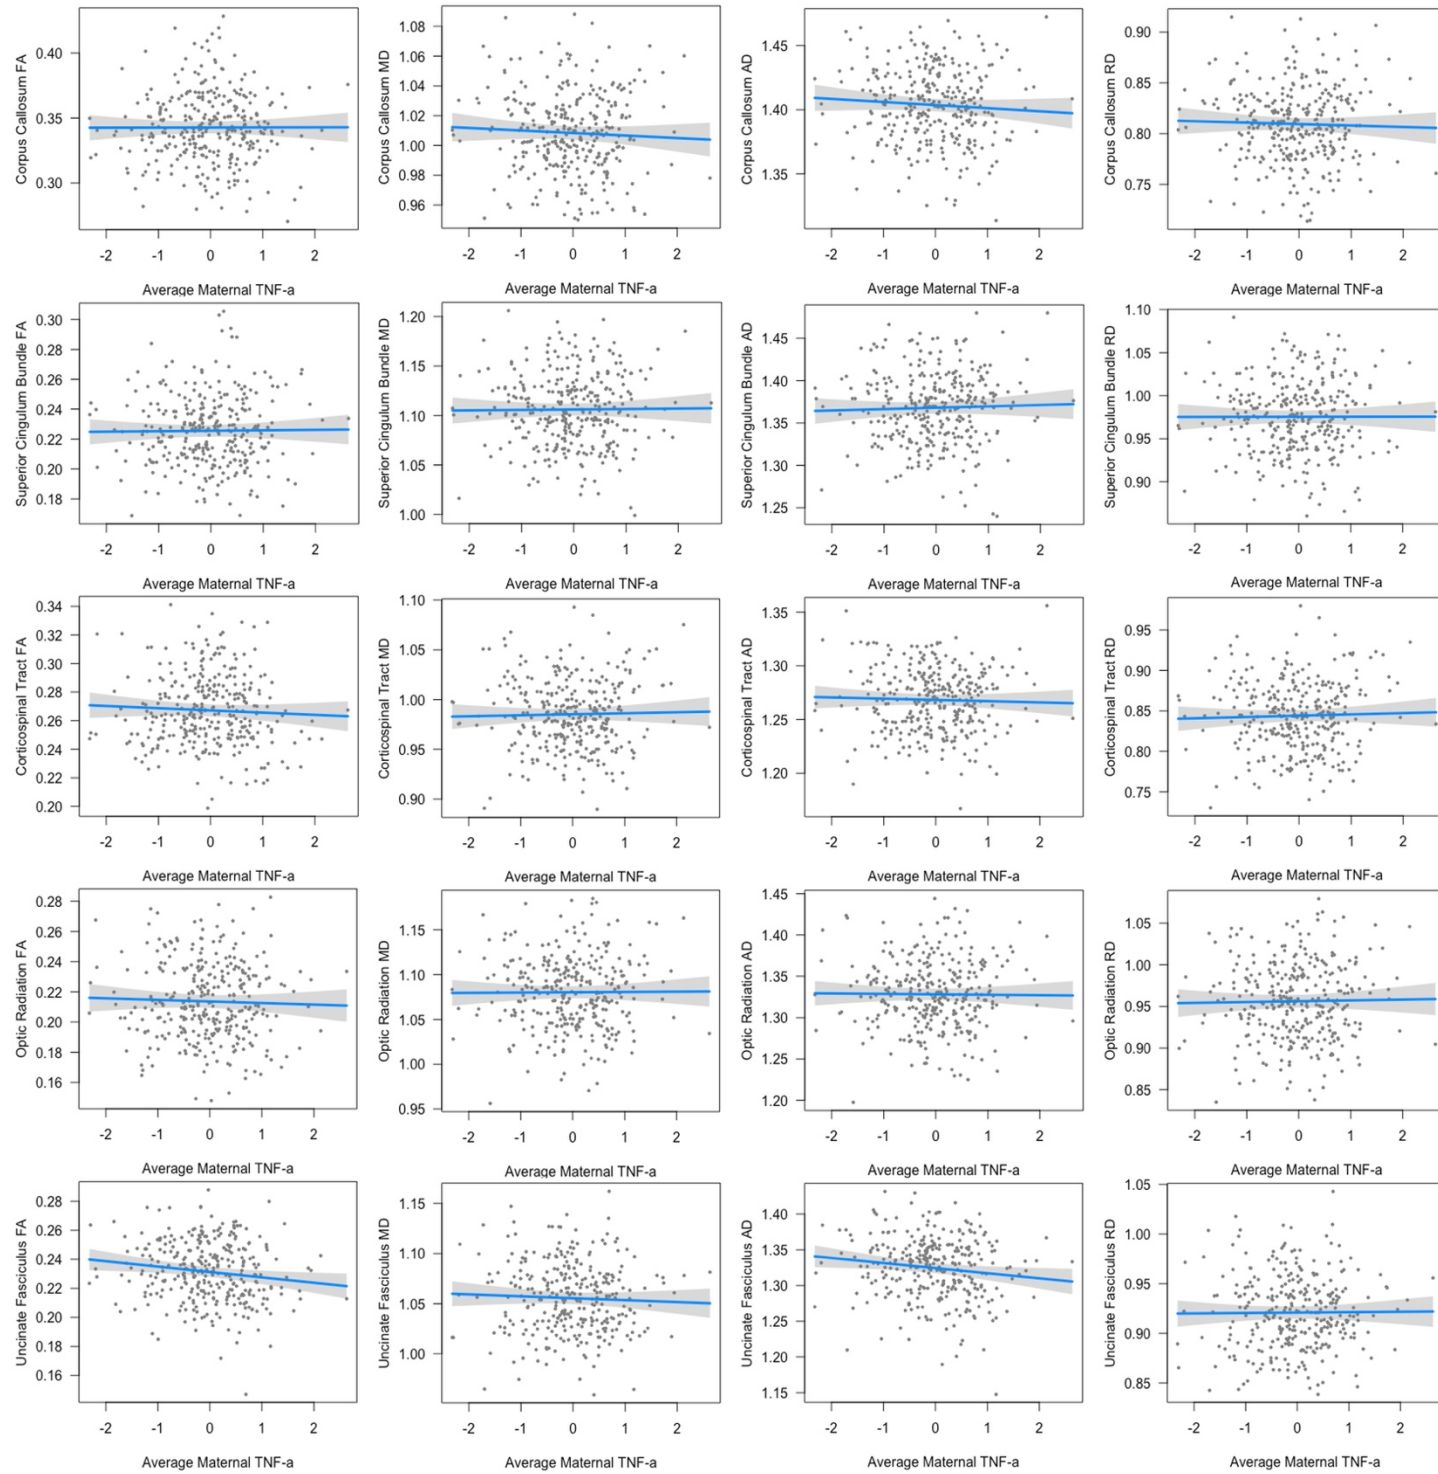

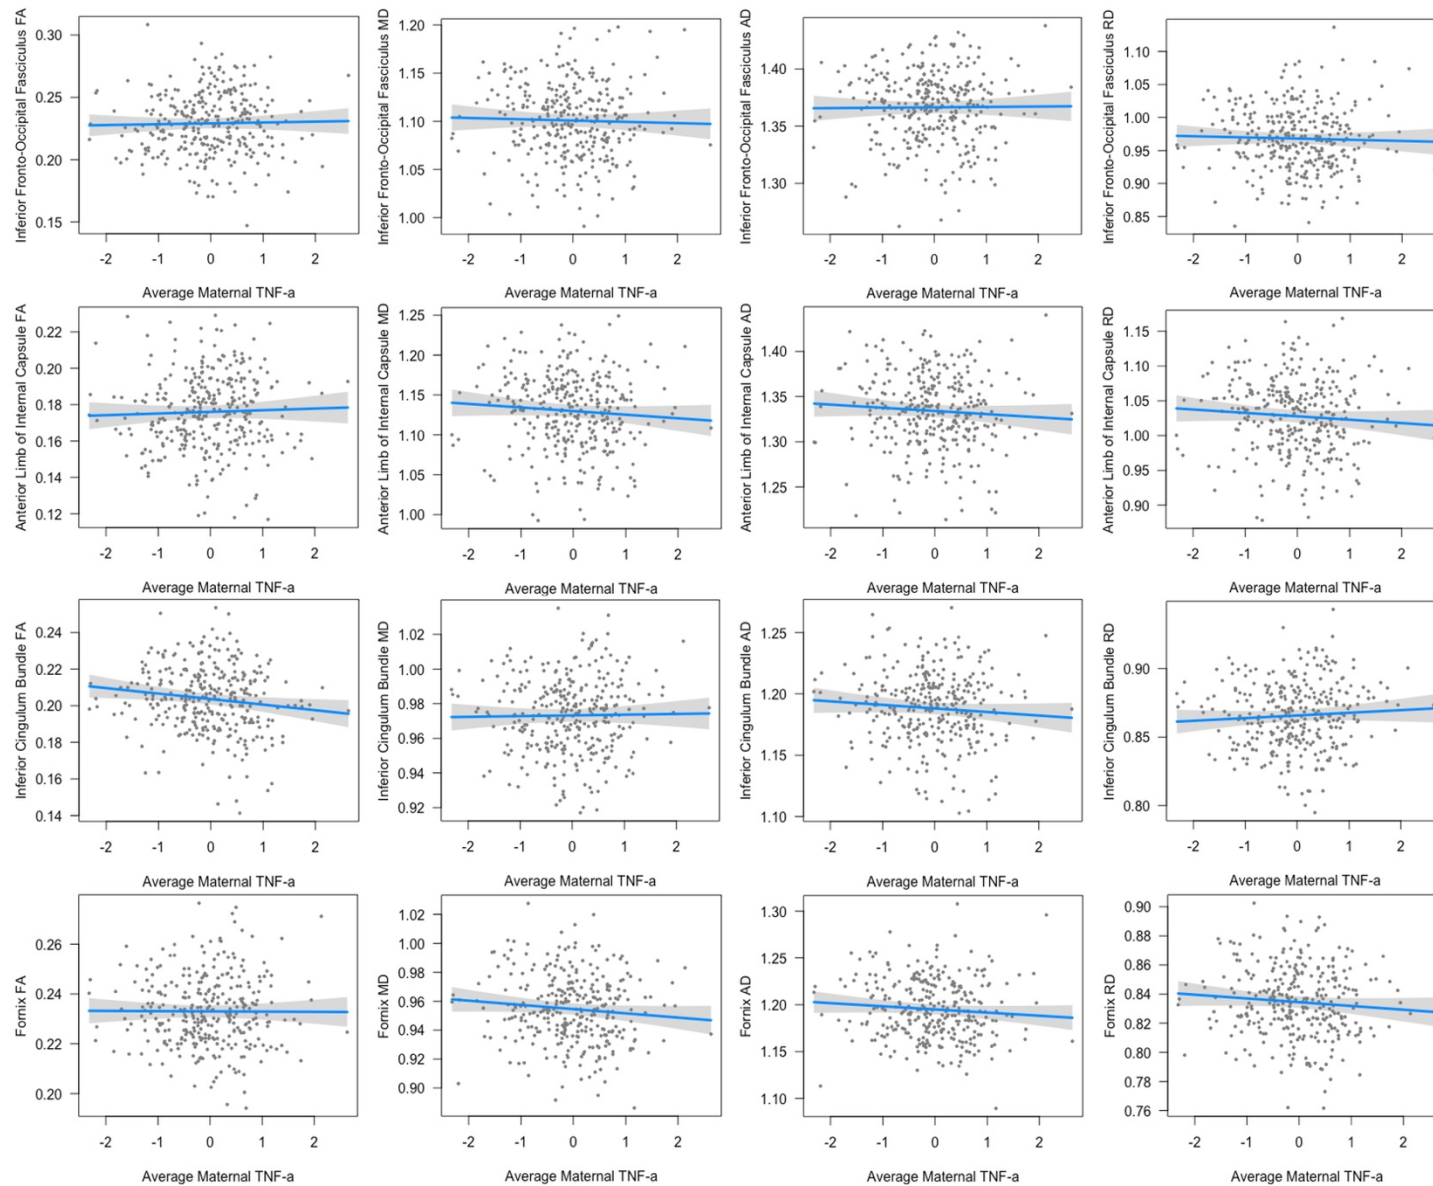

**Figure S5.** Multiple linear regression plots of the relationship between average maternal tumor necrosis factor alpha levels during pregnancy and neonatal white matter tract dMRI parameters. Covariates in models are child sex, gestational age at delivery, infant postmenstrual age at scan, and NICU stay. FA, fractional anisotropy; MD, mean diffusivity; AD, axial diffusivity; RD, radial diffusivity; TNF-a, tumor necrosis factor alpha.

## Supplementary Methods

Covariates for the SES group and maternal cytokine analysis included maternal age and maternal pre-pregnancy body mass index (BMI) to account for their potentially confounding roles on cytokine levels during pregnancy. Aging<sup>1</sup> and increased BMI<sup>2</sup> are linked to heightened concentrations of circulating cytokines and proinflammatory markers. For SES group, neonatal dMRI, and maternal cytokine analyses, covariates included sex, NICU stay >7 days, gestational age (GA) at delivery, and infant postmenstrual age (PMA) at scan<sup>3,4</sup>. While all infants in this sample were scanned within the first month of life, there was variability in PMA that may impact measures of white matter microstructure. Prior analyses from the same cohort used in the current study showed that infant PMA at scan accounted for 13-31% of the variance in MD, 18-32% of the variance in RD, 4-17% of the variance in AD, and 8-26% of the variance in FA across tracks and was therefore included as a covariate to account for expected age-related differences in infant white matter connectivity metrics.<sup>5</sup> Additionally, GA ranged from 28-41 weeks and was therefore included as a covariate. Our sample also included infants who were admitted to the NICU (>7 days). Given that NICU stressors have been associated with regional alterations in brain structure and function,<sup>6</sup> we controlled for NICU stay (no NICU stay = 0, NICU stay = 1) in all analyses. Finally, prior studies have reported sex differences in infant dMRI measures.<sup>7</sup> Therefore, models were adjusted for infant sex assigned at birth (male = 1, female = 2).

### *Psychosocial stress.*

In each trimester, mothers completed the Edinburg Postnatal Depression Scale (EPDS)<sup>8</sup> and the Cohen Perceived Stress Scale (PSS)<sup>9</sup> to assess depression symptoms and perceived stress, respectively. At the neonatal MRI scan, mothers completed the Stress and Adversity Inventory for Adults (STRAIN)<sup>10</sup> and the Everyday Discrimination Survey<sup>11</sup> to assess stressful/traumatic life events (count and severity) and racial discrimination, respectively. These observed variables were analyzed using structural equation modeling, resulting in the latent factor “psychosocial stress”. Observed psychosocial stress variables were all correlated (range 0.21-0.93, all  $p < 0.01$ ). See Luby et al.<sup>12</sup> for details. Mothers in the very low SES group had higher Psychosocial Stress scores ( $m=0.18$ ,  $SD=0.96$ ) than mothers in the lower-to-higher SES group ( $m=-0.39$ ,  $SD=0.76$ ,  $p<0.01$ ). There was a negative relationship between neonatal CBIF and maternal Psychosocial Stress ( $\beta=-0.13$ ;  $q=0.02$ ) controlling for child sex, NICU stay, GA at delivery, and infant PMA. There were no other associations between infant dMRI metrics and maternal Psychosocial Stress. Additionally, there were no associations between maternal Psychosocial stress scores and cytokine levels during pregnancy controlling for maternal age and pre-pregnancy BMI.

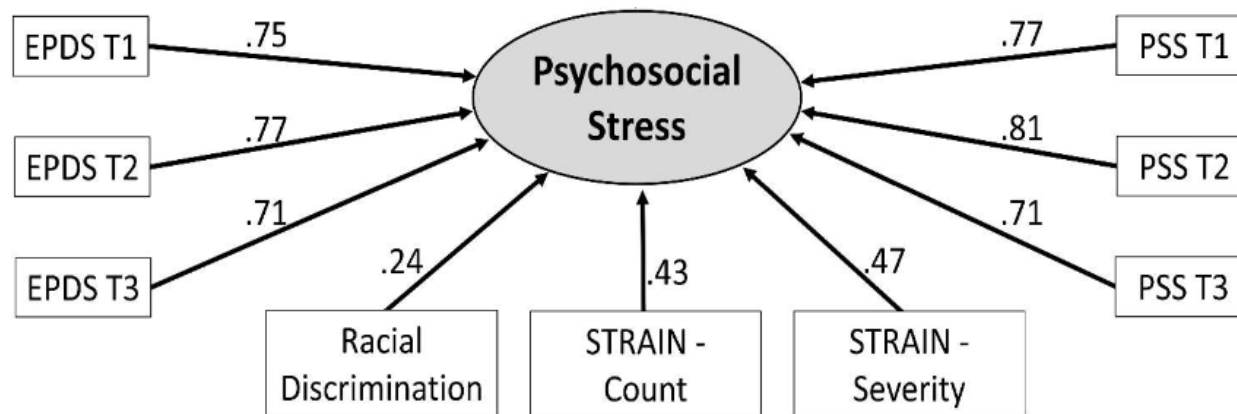

**Figure S6.** Structural equation model of psychosocial stress latent factor. Adapted from Luby et al.<sup>12</sup>, Figure S1 illustrates the latent prenatal Psychosocial Stress factor and its observed components (n=399). Standard estimates between the latent and observed variables are shown. T1, trimester 1; T2, trimester 2; T3, trimester 3; EPDS, Edinburg Postnatal Depression Scale; STRAIN, Stress and Adversity Inventory for Adults; PSS, Cohen Perceived Stress Scale.

## Supplementary Discussion

Early research into neonatal diffusion-based MR imaging revealed that water diffusion in the brain decreases while anisotropy rises with increasing age<sup>13-15</sup>. That is, as the brain matures, its water content declines, resulting in a drop in MD. Conversely, anisotropy values tend to increase with brain maturation due to increases in myelin content, resulting in age-dependent increases in FA<sup>16</sup>. However, FA values are more susceptible to noise than MD values – they are considerably affected by the number of diffusion-weighting directions<sup>17-19</sup>, and this effect is greater for isotropic than anisotropic structures<sup>20</sup>. Consequently, FA values tend to be overestimated due to such noise<sup>21</sup>.

Another caveat related to FA in neonates is its dependence on myelin content. In utero, the human fetal brain's major white matter tracts primarily develop over the second and third trimesters. During the first trimester, some commissural (e.g., corpus callosum) and projection (e.g., corticospinal tract) fibers are present, followed by limbic (e.g., cingulum) and association (fronto-occipital fasciculus) tracts that develop into the second and third trimesters<sup>4, 22, 23</sup>. While there is little myelin present during gestation, growth of myelin sheath around neuronal axons begins around mid-to-late gestation and is critical for short- and long-reaching communication in the brain<sup>24</sup>. Limbic and association fibers continue to myelinate into the first two postnatal years<sup>25</sup>. This developmental timing is important when considering FA in neonates – not all white matter tracts studied here are myelinated by the sampled age (i.e., >30 days). Therefore, we primarily focus on tract diffusivity in our discussion of findings while reminding the reader that our interpretation of FA-related results should be understood in the context of the caveats outlined here.

We found that family SES was related to white matter tract diffusivity (MD), but not anisotropy (FA), at birth. Neonates in the very low SES group displayed significantly lower MD in all tracts investigated except for the corpus callosum. The differential timing of white matter tract development in the human brain is characterized by two categories: “early developing” and “late developing”<sup>26</sup>. Early developing tracts include projections connecting sensorimotor regions, whereas later developing tracts project to and from association systems. In the current study, we found evidence of lower MD and AD in both early and later developing tracks, and lower RD primarily in later developing tracts in neonates born to very low SES families. Reflecting findings from Lean et al.<sup>5</sup>, our results suggest that SES may alter white matter microstructure regardless of myelination timing as we found relations to both early and late developing tracts. Reductions in MD neonatally reflect brain maturation. Here, we found evidence for aberrant maturation of brain-wide white matter tracts in neonates born to families experiencing economic hardship. A recent Perspective by Tooley et al.<sup>27</sup> outlined how environmental stressors, such as those commonly experienced by individuals from low SES backgrounds, may impact the pace of brain development. Children living in poverty face higher instances of crime<sup>28</sup>, toxin exposure (e.g., lead, mercury)<sup>29</sup>, noise and air pollution<sup>30</sup>, sleep disturbances<sup>31</sup>, and nutrient deficiencies<sup>32</sup>. Exposure to such stressors *in utero* has the potential to disrupt synaptic plasticity and myelination, ultimately affecting the course of neurodevelopment in profound ways. Specifically, they posit exposure to chronic, negative events accelerates brain maturation and reduces plasticity<sup>33</sup>. Our findings point to altered maturation of white matter in association with low SES, such that axonal integrity (as indicated by AD) may be altered across tracts regardless of their maturational timing and myelination (as indicated by RD) may be impacted in tracts that continue to develop postnatally.

Maternal inflammatory biomarkers during pregnancy were also associated with SES and altered white matter microstructure. IL-6 was the only cytokine studied here associated with family SES. Mothers in the very low SES group had significantly higher average IL-6 concentrations than those in the lower-to-higher SES group. Additionally, pregnant mothers with higher average IL-6 concentration birthed offspring with significantly lower AD in both early and later developing white matter tracts, and lower FA in both the corticospinal tract and uncinate. IL-6, a cytokine characterized

by its pro-inflammatory function, plays a necessary role in fetal brain development<sup>34</sup>. However, chronically elevated levels may have deleterious effects on cell survival, synaptogenesis, and axonal growth<sup>35</sup>. In mice, a single maternal injection of IL-6 can yield offspring with significant behavioral abnormalities<sup>36,37</sup>, illustrating the fetal brain's malleability in response to its environment. Our finding of lower neonatal AD across most tracts in relation to elevated maternal IL-6 concentration supports the notion that heightened inflammatory cytokine exposure may alter the course of axonal maturation. In terms of tract FA, a study by Rasmussen et al.<sup>38</sup> similarly found that elevated maternal IL-6 was associated with lower uncinate FA in newborns. The uncinate plays a key role in communication between regions involved in emotion regulation and higher-order cognition, and its integrity is associated with socioemotional development. Though our results suggest a negative relationship between maternal IL-6 and neonatal uncinate FA, it is important to note that FA is relatively insensitive to isotropic processes. Since the uncinate is one of the last structures to fully myelinate, this is of particular concern<sup>39,40</sup>. While we refrain from maturational rate inferences due to such concerns, our results in conjunction with those of Rasmussen et al. suggest that the uncinate in a developing fetus may be one tract that is sensitive to maternal inflammation during pregnancy.

In addition, we found that higher average maternal IL-10 concentration was associated with offspring exhibiting higher MD and RD in the corticospinal tract, higher RD in the inferior cingulum bundle, and lower FA in the corticospinal tract, inferior fronto-occipital fasciculus, and inferior cingulum bundle. IL-10, a key anti-inflammatory cytokine, has the ability to suppress inflammatory cytokine production. However, chronically elevated IL-10 concentrations have been implicated in behavioral abnormalities<sup>41</sup> and demyelination of white matter<sup>42</sup> in animal models. In patients with schizophrenia, higher circulating IL-10 levels have been linked with widespread increases in white matter MD and RD and decreases in FA<sup>43</sup>. While IL-10's role as a protective regulator has been highlighted in the literature, here we provide evidence for its role in neonatal white matter alterations. That is, elevated maternal IL-10 concentrations during gestation may have implications for maturational disturbances of major projection, limbic, and association fibers.

To interpret the pattern of results for SES and cytokine relations to white matter measures, we must also consider normal maturation and neurodevelopment. Myelination starts *in utero* and, for some prefrontal fiber tracts, is not complete until adolescence. As the brain matures, its water content declines, resulting in a drop in MD. Conversely, anisotropy values tend to increase with brain maturation due to increasing myelin content, resulting in age-dependent increases in FA<sup>16</sup>. At the PMA studied herein, some tracts are myelinated and others are not, which affects the interpretation of FA values. While MD reflects water displacements in all directions within a voxel, FA represents the spatial heterogeneity of those displacements. FA values in myelinated white matter thereby reflect the degree of myelination, with heavier or more mature myelination leading to higher FA values. For unmyelinated white matter tracts, FA is related to the packing of parallel fibers, with tighter packing leading to higher FA values. At the age at which infants were evaluated for this study (term equivalent PMA), the CST and, to a lesser extent, the OR are myelinated (i.e., earlier developing), and the remainder of the white matter tracts included in this study are not (i.e., later developing). Overall, higher RD values with lower FA suggest altered maturation and, in the case of the earlier developing tracts, reduced myelination<sup>44-47</sup>.



## References

1. Michaud M, Balardy L, Moulis G, Gaudin C, Peyrot C, Vellas B *et al.* Proinflammatory cytokines, aging, and age-related diseases. *J Am Med Dir Assoc* 2013; **14**(12): 877-882.
2. Maguire RL, House JS, Lloyd DT, Skinner HG, Allen TK, Raffi AM *et al.* Associations between maternal obesity, gestational cytokine levels and child obesity in the NEST cohort. *Pediatr Obes* 2021; **16**(7): e12763.
3. Back SA, Luo NL, Borenstein NS, Levine JM, Volpe JJ, Kinney HC. Late oligodendrocyte progenitors coincide with the developmental window of vulnerability for human perinatal white matter injury. *J Neurosci* 2001; **21**(4): 1302-1312.
4. Dubois J, Dehaene-Lambertz G, Kulikova S, Poupon C, Hüppi PS, Hertz-Pannier L. The early development of brain white matter: a review of imaging studies in fetuses, newborns and infants. *Neuroscience* 2014; **276**: 48-71.
5. Lean RE, Smyser CD, Brady RG, Triplett RL, Kaplan S, Kenley JK *et al.* Exposure to Prenatal Social Disadvantage and Maternal Psychosocial Stress: Relationships to Neonatal White Matter Connectivity. *medRxiv* 2022.
6. Smith GC, Gutovich J, Smyser C, Pineda R, Newnham C, Tjoeng TH *et al.* Neonatal intensive care unit stress is associated with brain development in preterm infants. *Ann Neurol* 2011; **70**(4): 541-549.
7. Dean DC, Planalp EM, Wooten W, Adluru N, Kecskemeti SR, Frye C *et al.* Mapping White Matter Microstructure in the One Month Human Brain. *Sci Rep* 2017; **7**(1): 9759.
8. Cox JL, Holden JM, Sagovsky R. Detection of postnatal depression. Development of the 10-item Edinburgh Postnatal Depression Scale. *Br J Psychiatry* 1987; **150**: 782-786.
9. Cohen S, Kamarck T, Mermelstein R. A global measure of perceived stress. *J Health Soc Behav* 1983; **24**(4): 385-396.
10. Slavich GM, Shields GS. Assessing Lifetime Stress Exposure Using the Stress and Adversity Inventory for Adults (Adult STRAIN): An Overview and Initial Validation. *Psychosom Med* 2018; **80**(1): 17-27.
11. Williams DR, Yan Yu, Jackson JS, Anderson NB. Racial Differences in Physical and Mental Health: Socio-economic Status, Stress and Discrimination. *J Health Psychol* 1997; **2**(3): 335-351.
12. Luby JL, Barch DM, Warner B, Rogers C, Smyser C, Triplett R *et al.* Modeling prenatal adversity/advantage: Effects on birth weight. *medRxiv* 2021.

13. Hüppi PS, Maier SE, Peled S, Zientara GP, Barnes PD, Jolesz FA *et al.* Microstructural development of human newborn cerebral white matter assessed in vivo by diffusion tensor magnetic resonance imaging. *Pediatr Res* 1998; **44**(4): 584-590.
14. Neil JJ, Shiran SI, McKinstry RC, Schefft GL, Snyder AZ, Almlí CR *et al.* Normal brain in human newborns: apparent diffusion coefficient and diffusion anisotropy measured by using diffusion tensor MR imaging. *Radiology* 1998; **209**(1): 57-66.
15. Mukherjee P, Miller JH, Shimony JS, Conturo TE, Lee BC, Almlí CR *et al.* Normal brain maturation during childhood: developmental trends characterized with diffusion-tensor MR imaging. *Radiology* 2001; **221**(2): 349-358.
16. Beaulieu C, Fenrich FR, Allen PS. Multicomponent water proton transverse relaxation and T2-discriminated water diffusion in myelinated and nonmyelinated nerve. *Magn Reson Imaging* 1998; **16**(10): 1201-1210.
17. Bastin ME, Armitage PA, Marshall I. A theoretical study of the effect of experimental noise on the measurement of anisotropy in diffusion imaging. *Magn Reson Imaging* 1998; **16**(7): 773-785.
18. Anderson AW. Theoretical analysis of the effects of noise on diffusion tensor imaging. *Magn Reson Med* 2001; **46**(6): 1174-1188.
19. Skare S, Li T, Nordell B, Ingvar M. Noise considerations in the determination of diffusion tensor anisotropy. *Magn Reson Imaging* 2000; **18**(6): 659-669.
20. Giannelli M, Cosottini M, Michelassi MC, Lazzarotti G, Belmonte G, Bartolozzi C *et al.* Dependence of brain DTI maps of fractional anisotropy and mean diffusivity on the number of diffusion weighting directions. *J Appl Clin Med Phys* 2009; **11**(1): 2927.
21. Pierpaoli C, Basser PJ. Toward a quantitative assessment of diffusion anisotropy. *Magn Reson Med* 1996; **36**(6): 893-906.
22. Ouyang M, Dubois J, Yu Q, Mukherjee P, Huang H. Delineation of early brain development from fetuses to infants with diffusion MRI and beyond. *Neuroimage* 2019; **185**: 836-850.
23. Takahashi E, Folkerth RD, Galaburda AM, Grant PE. Emerging cerebral connectivity in the human fetal brain: an MR tractography study. *Cereb Cortex* 2012; **22**(2): 455-464.
24. Fields RD. Neuroscience. Change in the brain's white matter. *Science* 2010; **330**(6005): 768-769.
25. Geng X, Gouttard S, Sharma A, Gu H, Styner M, Lin W *et al.* Quantitative tract-based white matter development from birth to age 2 years. *Neuroimage* 2012; **61**(3): 542-557.

26. Sydnor VJ, Larsen B, Bassett DS, Alexander-Bloch A, Fair DA, Liston C *et al.* Neurodevelopment of the association cortices: Patterns, mechanisms, and implications for psychopathology. *Neuron* 2021; **109**(18): 2820-2846.
27. Tooley UA, Bassett DS, Mackey AP. Environmental influences on the pace of brain development. *Nat Rev Neurosci* 2021; **22**(6): 372-384.
28. Brady RG, Rogers CE, Prochaska T, Kaplan S, Lean RE, Smyser TA *et al.* The Effects of Prenatal Exposure to Neighborhood Crime on Neonatal Functional Connectivity. *Biol Psychiatry* 2022; **92**(2): 139-148.
29. Rauh VA, Landrigan PJ, Claudio L. Housing and health: intersection of poverty and environmental exposures. *Ann N Y Acad Sci* 2008; **1136**: 276-288.
30. Zhang M, Mueller NT, Wang H, Hong X, Appel LJ, Wang X. Maternal exposure to ambient particulate matter  $\leq 2.5 \mu\text{m}$  during pregnancy and the risk for high blood pressure in childhood. *Hypertension* 2018; **72**(1): 194-201.
31. Hoyniak CP, Whalen D, Luby J, Barch D, Miller JP, Zhao P *et al.* Chronodisruption during Pregnancy Mediates the Relationship between Social Disadvantage and Reduced Brain Maturation in Neonates. *medRxiv* 2022.
32. Ernawati E, Kurniawati L, Umijati S. Correlation between Gestational Weight Gain in the Second and Third Trimester and Preeclampsia Risk: A Study From Indonesia. *Indian Journal of Forensic Medicine & Toxicology* 2021; **15**(4): 1072-1078.
33. Bock J, Wainstock T, Braun K, Segal M. Stress In Utero: Prenatal Programming of Brain Plasticity and Cognition. *Biol Psychiatry* 2015; **78**(5): 315-326.
34. Burns TM, Clough JA, Klein RM, Wood GW, Berman NE. Developmental regulation of cytokine expression in the mouse brain. *Growth Factors* 1993; **9**(4): 253-258.
35. Deverman BE, Patterson PH. Cytokines and CNS development. *Neuron* 2009; **64**(1): 61-78.
36. Smith SE, Li J, Garbett K, Mirnics K, Patterson PH. Maternal immune activation alters fetal brain development through interleukin-6. *J Neurosci* 2007; **27**(40): 10695-10702.
37. Samuelsson A-M, Jennische E, Hansson H-A, Holmang A. Prenatal exposure to interleukin-6 results in inflammatory neurodegeneration in hippocampus with NMDA/GABAA dysregulation and impaired spatial learning. *American Journal of Physiology-Regulatory, Integrative and Comparative Physiology* 2006; **290**(5): R1345-R1356.

38. Rasmussen JM, Graham AM, Entringer S, Gilmore JH, Styner M, Fair DA *et al.* Maternal Interleukin-6 concentration during pregnancy is associated with variation in frontolimbic white matter and cognitive development in early life. *Neuroimage* 2019; **185**: 825-835.
39. Miranda-Dominguez O, Mills BD, Grayson D, Woodall A, Grant KA, Kroenke CD *et al.* Bridging the gap between the human and macaque connectome: a quantitative comparison of global interspecies structure-function relationships and network topology. *J Neurosci* 2014; **34**(16): 5552-5563.
40. Grayson DS, Fair DA. Development of large-scale functional networks from birth to adulthood: A guide to the neuroimaging literature. *Neuroimage* 2017; **160**: 15-31.
41. Meyer U, Murray PJ, Urwyler A, Yee BK, Schedlowski M, Feldon J. Adult behavioral and pharmacological dysfunctions following disruption of the fetal brain balance between pro-inflammatory and IL-10-mediated anti-inflammatory signaling. *Mol Psychiatry* 2008; **13**(2): 208-221.
42. Puntambekar SS, Hinton DR, Yin X, Savarin C, Bergmann CC, Trapp BD *et al.* Interleukin-10 is a critical regulator of white matter lesion containment following viral induced demyelination. *Glia* 2015; **63**(11): 2106-2120.
43. Fu G, Zhang W, Dai J, Liu J, Li F, Wu D *et al.* Increased Peripheral Interleukin 10 Relate to White Matter Integrity in Schizophrenia. *Front Neurosci* 2019; **13**: 52.
44. Buyanova IS, Arsalidou M. Cerebral White Matter Myelination and Relations to Age, Gender, and Cognition: A Selective Review. *Front Hum Neurosci* 2021; **15**: 662031.
45. Kinney HC, Brody BA, Kloman AS, Gilles FH. Sequence of central nervous system myelination in human infancy. II. Patterns of myelination in autopsied infants. *J Neuropathol Exp Neurol* 1988; **47**(3): 217-234.
46. Brody BA, Kinney HC, Kloman AS, Gilles FH. Sequence of central nervous system myelination in human infancy. I. An autopsy study of myelination. *J Neuropathol Exp Neurol* 1987; **46**(3): 283-301.
47. Yakovlev PI. The myelogenetic cycles of regional maturation of the brain. *Regional development of the brain in early life* 1967: 3-70.
